# Supplementary material for: Isolation and transcriptome analysis of a biotechnologically promising Black Sea protist, Thraustochytrium aureum ssp. strugatskii
Source: PeerJ. 2022 Mar 9;10:e12737. doi: 10.7717/peerj.12737 (PMC8917795; doi:10.7717/peerj.12737)
Supplement: Supplemental Information 3 [file peerj-10-12737-s003.xlsx]

## Sheet: Place of material collection
Species	Place of material collection	Source
Aurantiochytrium limacinum	Seawater in mangrove area, Colonia, Yap Islands, Micronesia, Oceania	American Type Culture Collection
Botryochytrium radiatum	Langkawi Is., Malaysia	https://doi.org/10.1007/S10267-007-0377-1
Hondaea fermentalgiana	Mayotte Island (Indian Ocean)	https://doi.org/10.1016/j.algal.2018.08.018
Parietichytrium sarkarianum	Penang Is., Malaysia	https://doi.org/10.1007/S10267-007-0377-1
Parietichytrium sarkarianum	Iriomote Is., Japan	https://doi.org/10.1007/S10267-007-0377-1
Schizochytrium limacinum	West Pacific Ocean	https://doi.org/10.1017/S0953756297005170
Schizochytrium sp. ATCC 20888	Estuarine water, California	American Type Culture Collection
Schizochytrium sp. CCTCC M209059	-	https://doi.org/10.1007/s11814-013-0020-0
Sicyoidochytrium minutum	Langkawi Is., Malaysia	https://doi.org/10.1007/S10267-007-0377-1
Thraustochytrium aureum Goldstein ATCC 34304	Littoral water, Woods Hole, Massachusetts, USA	American Type Culture Collection
Thraustochytrium kinnei	King George Island, Antarctic islands	American Type Culture Collection
Thraustochytrium roseum	New Haven, USA	American Type Culture Collection
Ulkenia amoeboidea	Hiroshima, Japan	https://doi.org/10.1007/S10267-007-0377-1

## Sheet: Proteome source
Species	Proteome source
Aplanochytriun kerguelense PBS07 v1.0	https://phycocosm.jgi.doe.gov/Aplke1/Aplke1.home.html
Aurantiochytrium limacinum ATCC MYA-1381	https://mycocosm.jgi.doe.gov/Aurli1/Aurli1.home.html
Aurecoccus anophagefferens	NCBI - PRJNA259758
Hondaea fermentalgiana	NCBI - PRJDB6540
Phytophthora infestans	NCBI - PRJNA17665
Saprolegnia parasitica	NCBI - PRJNA280969
Schizochytrium aggregatum ATCC 28209	https://mycocosm.jgi.doe.gov/Schag1/Schag1.home.html

## Sheet: Genome source
Species	Genome source
Aplanochytriun kerguelense PBS07 v1.0	https://phycocosm.jgi.doe.gov/Aplke1/Aplke1.home.html
Aurantiochytrium limacinum ATCC MYA-1381	https://mycocosm.jgi.doe.gov/Aurli1/Aurli1.home.html
Hondaea fermentalgiana	NCBI - PRJDB6540
Schizochytrium aggregatum ATCC 28209	https://mycocosm.jgi.doe.gov/Schag1/Schag1.home.html
Thraustochytrium sp. ATCC 26185	NCBI - ASM215423v1
