# Supplementary material for: Isolation and transcriptome analysis of a biotechnologically promising Black Sea protist, Thraustochytrium aureum ssp. strugatskii
Source: PeerJ. 2022 Mar 9;10:e12737. doi: 10.7717/peerj.12737 (PMC8917795; doi:10.7717/peerj.12737)
Supplement: Supplemental Information 4 [file peerj-10-12737-s004.xlsx]

## Sheet: Pfam_hofe
T. aureum ssp. strugatski predicted protein	Pfam domain ID	Domain start	Domain end	E-value
TRINITY_DN30406_c0_g1::TRINITY_DN30406_c0_g1_i1::g.81980::m.81980	PF00001.21	34	111	1.4e-06
TRINITY_DN16705_c0_g1::TRINITY_DN16705_c0_g1_i2::g.36326::m.36326	PF00001.21	15	133	0.00034
TRINITY_DN9633_c0_g1::TRINITY_DN9633_c0_g1_i1::g.14033::m.14033	PF00002.24	61	162	2.7e-10
TRINITY_DN22170_c0_g1::TRINITY_DN22170_c0_g1_i3::g.72087::m.72087	PF00002.24	717	956	3e-07
TRINITY_DN22099_c0_g1::TRINITY_DN22099_c0_g1_i3::g.71240::m.71240	PF00002.24	703	932	1e-08
TRINITY_DN22099_c0_g1::TRINITY_DN22099_c0_g1_i2::g.71233::m.71233	PF00002.24	701	930	9.8e-09
TRINITY_DN19650_c0_g1::TRINITY_DN19650_c0_g1_i2::g.51026::m.51026	PF00002.24	784	942	3e-08
TRINITY_DN19650_c0_g1::TRINITY_DN19650_c0_g1_i1::g.51016::m.51016	PF00002.24	784	942	3e-08
TRINITY_DN9817_c0_g1::TRINITY_DN9817_c0_g1_i1::g.14596::m.14596	PF00003.22	63	170	0.00025
TRINITY_DN706_c0_g1::TRINITY_DN706_c0_g1_i1::g.924::m.924	PF00003.22	72	108	0.00072
TRINITY_DN5109_c0_g1::TRINITY_DN5109_c0_g1_i2::g.6489::m.6489	PF00003.22	2	91	8.7e-10
TRINITY_DN5109_c0_g1::TRINITY_DN5109_c0_g1_i1::g.6486::m.6486	PF00003.22	2	130	6.6e-14
TRINITY_DN479_c0_g1::TRINITY_DN479_c0_g1_i1::g.640::m.640	PF00003.22	14	205	1.6e-34
TRINITY_DN34189_c0_g1::TRINITY_DN34189_c0_g1_i1::g.85345::m.85345	PF00003.22	1	76	2.6e-14
TRINITY_DN32943_c0_g1::TRINITY_DN32943_c0_g1_i1::g.84176::m.84176	PF00003.22	6	171	6.7e-19
TRINITY_DN32897_c0_g1::TRINITY_DN32897_c0_g1_i1::g.84149::m.84149	PF00003.22	21	118	3.3e-09
TRINITY_DN32738_c0_g1::TRINITY_DN32738_c0_g1_i1::g.83965::m.83965	PF00003.22	15	110	1.1e-12
TRINITY_DN31287_c0_g1::TRINITY_DN31287_c0_g1_i1::g.82853::m.82853	PF00003.22	13	129	1.5e-18
TRINITY_DN306_c0_g1::TRINITY_DN306_c0_g1_i1::g.424::m.424	PF00003.22	20	110	3.5e-07
TRINITY_DN28659_c0_g1::TRINITY_DN28659_c0_g1_i1::g.80419::m.80419	PF00003.22	24	100	7.8e-05
TRINITY_DN27448_c0_g1::TRINITY_DN27448_c0_g1_i1::g.79356::m.79356	PF00003.22	26	123	1.1e-17
TRINITY_DN26808_c0_g1::TRINITY_DN26808_c0_g1_i1::g.78692::m.78692	PF00003.22	15	112	1.1e-09
TRINITY_DN26544_c0_g1::TRINITY_DN26544_c0_g1_i1::g.78386::m.78386	PF00003.22	23	79	0.00048
TRINITY_DN26356_c0_g1::TRINITY_DN26356_c0_g1_i1::g.78131::m.78131	PF00003.22	2	79	4.6e-15
TRINITY_DN24962_c0_g1::TRINITY_DN24962_c0_g1_i1::g.77059::m.77059	PF00003.22	17	166	6.4e-22
TRINITY_DN23325_c0_g1::TRINITY_DN23325_c0_g1_i1::g.75477::m.75477	PF00003.22	69	111	4.5e-05
TRINITY_DN22101_c0_g2::TRINITY_DN22101_c0_g2_i6::g.72376::m.72376	PF00003.22	471	551	8.4e-10
TRINITY_DN22101_c0_g2::TRINITY_DN22101_c0_g2_i5::g.72373::m.72373	PF00003.22	560	753	1.3e-21
TRINITY_DN22101_c0_g2::TRINITY_DN22101_c0_g2_i4::g.72370::m.72370	PF00003.22	552	745	1.3e-21
TRINITY_DN22092_c0_g1::TRINITY_DN22092_c0_g1_i3::g.71287::m.71287	PF00003.22	318	545	1.7e-19
TRINITY_DN22092_c0_g1::TRINITY_DN22092_c0_g1_i2::g.71282::m.71282	PF00003.22	307	534	1.6e-19
TRINITY_DN21979_c0_g1::TRINITY_DN21979_c0_g1_i1::g.69633::m.69633	PF00003.22	836	1077	2.6e-39
TRINITY_DN21409_c0_g1::TRINITY_DN21409_c0_g1_i1::g.64126::m.64126	PF00003.22	526	763	3.1e-26
TRINITY_DN21316_c0_g1::TRINITY_DN21316_c0_g1_i1::g.62794::m.62794	PF00003.22	71	288	3e-14
TRINITY_DN21234_c0_g1::TRINITY_DN21234_c0_g1_i1::g.62263::m.62263	PF00003.22	555	786	2.6e-15
TRINITY_DN21080_c0_g1::TRINITY_DN21080_c0_g1_i1::g.60819::m.60819	PF00003.22	779	1031	3.1e-38
TRINITY_DN20949_c0_g1::TRINITY_DN20949_c0_g1_i2::g.60131::m.60131	PF00003.22	244	468	1.3e-22
TRINITY_DN20949_c0_g1::TRINITY_DN20949_c0_g1_i1::g.60126::m.60126	PF00003.22	248	472	1.3e-22
TRINITY_DN20329_c0_g1::TRINITY_DN20329_c0_g1_i2::g.55669::m.55669	PF00003.22	78	303	2.2e-17
TRINITY_DN20329_c0_g1::TRINITY_DN20329_c0_g1_i1::g.55662::m.55662	PF00003.22	78	303	2.1e-17
TRINITY_DN20199_c0_g1::TRINITY_DN20199_c0_g1_i1::g.54021::m.54021	PF00003.22	16	75	5.4e-38
TRINITY_DN20199_c0_g1::TRINITY_DN20199_c0_g1_i1::g.54021::m.54021	PF00003.22	521	777	5.4e-38
TRINITY_DN20155_c0_g1::TRINITY_DN20155_c0_g1_i1::g.54577::m.54577	PF00003.22	74	364	6e-15
TRINITY_DN19845_c0_g1::TRINITY_DN19845_c0_g1_i1::g.52612::m.52612	PF00003.22	1018	1271	6.4e-33
TRINITY_DN19764_c0_g1::TRINITY_DN19764_c0_g1_i1::g.51615::m.51615	PF00003.22	586	834	6e-38
TRINITY_DN19582_c0_g1::TRINITY_DN19582_c0_g1_i1::g.50379::m.50379	PF00003.22	447	723	4.5e-31
TRINITY_DN19434_c0_g1::TRINITY_DN19434_c0_g1_i4::g.49891::m.49891	PF00003.22	2	135	7.7e-20
TRINITY_DN19434_c0_g1::TRINITY_DN19434_c0_g1_i3::g.49881::m.49881	PF00003.22	2	135	7.7e-20
TRINITY_DN19434_c0_g1::TRINITY_DN19434_c0_g1_i2::g.49877::m.49877	PF00003.22	2	135	1e-19
TRINITY_DN19434_c0_g1::TRINITY_DN19434_c0_g1_i1::g.49872::m.49872	PF00003.22	2	135	7.7e-20
TRINITY_DN19307_c0_g1::TRINITY_DN19307_c0_g1_i1::g.48975::m.48975	PF00003.22	312	562	1.8e-38
TRINITY_DN19080_c0_g1::TRINITY_DN19080_c0_g1_i1::g.47700::m.47700	PF00003.22	535	790	1.3e-36
TRINITY_DN18863_c0_g1::TRINITY_DN18863_c0_g1_i2::g.46367::m.46367	PF00003.22	188	425	1.4e-18
TRINITY_DN18863_c0_g1::TRINITY_DN18863_c0_g1_i1::g.46364::m.46364	PF00003.22	76	313	9.1e-19
TRINITY_DN18748_c0_g1::TRINITY_DN18748_c0_g1_i1::g.45976::m.45976	PF00003.22	522	772	1.2e-43
TRINITY_DN16018_c0_g1::TRINITY_DN16018_c0_g1_i1::g.33280::m.33280	PF00003.22	126	351	3e-28
TRINITY_DN15641_c0_g1::TRINITY_DN15641_c0_g1_i1::g.31757::m.31757	PF00003.22	495	720	3.2e-24
TRINITY_DN15364_c0_g1::TRINITY_DN15364_c0_g1_i1::g.30782::m.30782	PF00003.22	521	630	1.3e-10
TRINITY_DN12738_c0_g1::TRINITY_DN12738_c0_g1_i1::g.22199::m.22199	PF00003.22	17	208	6.2e-37
TRINITY_DN12369_c0_g1::TRINITY_DN12369_c0_g1_i1::g.20997::m.20997	PF00003.22	27	128	1.1e-10
TRINITY_DN11926_c0_g1::TRINITY_DN11926_c0_g1_i2::g.19916::m.19916	PF00003.22	23	216	2.3e-33
TRINITY_DN11865_c0_g1::TRINITY_DN11865_c0_g1_i1::g.19503::m.19503	PF00003.22	215	293	1.9e-09
TRINITY_DN11283_c0_g1::TRINITY_DN11283_c0_g1_i1::g.17878::m.17878	PF00003.22	10	138	1.6e-14
TRINITY_DN10023_c0_g1::TRINITY_DN10023_c0_g1_i1::g.15076::m.15076	PF00003.22	93	186	3e-17
TRINITY_DN9679_c0_g1::TRINITY_DN9679_c0_g1_i1::g.14105::m.14105	PF00004.29	8	102	1.2e-14
TRINITY_DN9648_c0_g1::TRINITY_DN9648_c0_g1_i1::g.14148::m.14148	PF00004.29	11	118	6.8e-07
TRINITY_DN9639_c0_g1::TRINITY_DN9639_c0_g1_i1::g.14151::m.14151	PF00004.29	53	218	1.8e-05
TRINITY_DN9531_c0_g1::TRINITY_DN9531_c0_g1_i1::g.13783::m.13783	PF00004.29	147	177	3.8e-05
TRINITY_DN9531_c0_g1::TRINITY_DN9531_c0_g1_i1::g.13783::m.13783	PF00004.29	314	335	3.8e-05
TRINITY_DN9189_c0_g1::TRINITY_DN9189_c0_g1_i1::g.13042::m.13042	PF00004.29	13	54	1.9e-30
TRINITY_DN9189_c0_g1::TRINITY_DN9189_c0_g1_i1::g.13042::m.13042	PF00004.29	48	75	1.9e-30
TRINITY_DN9189_c0_g1::TRINITY_DN9189_c0_g1_i1::g.13042::m.13042	PF00004.29	144	237	1.9e-30
TRINITY_DN8842_c0_g1::TRINITY_DN8842_c0_g1_i1::g.12427::m.12427	PF00004.29	65	218	1.9e-08
TRINITY_DN8687_c0_g1::TRINITY_DN8687_c0_g1_i1::g.12083::m.12083	PF00004.29	58	175	3.8e-16
TRINITY_DN8687_c0_g1::TRINITY_DN8687_c0_g1_i1::g.12083::m.12083	PF00004.29	282	311	3.8e-16
TRINITY_DN812_c0_g1::TRINITY_DN812_c0_g1_i1::g.1047::m.1047	PF00004.29	1	67	2.5e-14
TRINITY_DN812_c0_g1::TRINITY_DN812_c0_g1_i1::g.1047::m.1047	PF00004.29	108	146	2.5e-14
TRINITY_DN7646_c0_g1::TRINITY_DN7646_c0_g1_i1::g.10376::m.10376	PF00004.29	310	386	7.1e-05
TRINITY_DN7261_c0_g1::TRINITY_DN7261_c0_g1_i1::g.9783::m.9783	PF00004.29	35	172	7e-38
TRINITY_DN7077_c0_g1::TRINITY_DN7077_c0_g1_i1::g.9538::m.9538	PF00004.29	32	59	2.2e-05
TRINITY_DN7077_c0_g1::TRINITY_DN7077_c0_g1_i1::g.9538::m.9538	PF00004.29	318	350	2.2e-05
TRINITY_DN7077_c0_g1::TRINITY_DN7077_c0_g1_i1::g.9538::m.9538	PF00004.29	464	474	2.2e-05
TRINITY_DN6598_c0_g1::TRINITY_DN6598_c0_g1_i1::g.8650::m.8650	PF00004.29	193	320	4.9e-48
TRINITY_DN6598_c0_g1::TRINITY_DN6598_c0_g1_i1::g.8650::m.8650	PF00004.29	475	603	4.9e-48
TRINITY_DN6394_c0_g1::TRINITY_DN6394_c0_g1_i1::g.8296::m.8296	PF00004.29	14	137	6.9e-12
TRINITY_DN6394_c0_g1::TRINITY_DN6394_c0_g1_i1::g.8296::m.8296	PF00004.29	165	185	6.9e-12
TRINITY_DN5936_c0_g1::TRINITY_DN5936_c0_g1_i1::g.7620::m.7620	PF00004.29	58	179	6.1e-36
TRINITY_DN4031_c0_g1::TRINITY_DN4031_c0_g1_i1::g.5075::m.5075	PF00004.29	1	122	2.8e-34
TRINITY_DN33514_c0_g1::TRINITY_DN33514_c0_g1_i1::g.84848::m.84848	PF00004.29	69	203	5.6e-07
TRINITY_DN31825_c0_g1::TRINITY_DN31825_c0_g1_i1::g.83343::m.83343	PF00004.29	5	36	1.5e-07
TRINITY_DN31825_c0_g1::TRINITY_DN31825_c0_g1_i1::g.83343::m.83343	PF00004.29	82	101	1.5e-07
TRINITY_DN28189_c0_g1::TRINITY_DN28189_c0_g1_i1::g.79708::m.79708	PF00004.29	5	41	0.00014
TRINITY_DN26749_c0_g1::TRINITY_DN26749_c0_g1_i1::g.78579::m.78579	PF00004.29	1	74	0.00015
TRINITY_DN26520_c0_g1::TRINITY_DN26520_c0_g1_i1::g.78336::m.78336	PF00004.29	69	103	0.00013
TRINITY_DN26520_c0_g1::TRINITY_DN26520_c0_g1_i1::g.78336::m.78336	PF00004.29	214	312	0.00013
TRINITY_DN239_c0_g1::TRINITY_DN239_c0_g1_i1::g.297::m.297	PF00004.29	36	59	0.00035
TRINITY_DN22269_c2_g1::TRINITY_DN22269_c2_g1_i2::g.74099::m.74099	PF00004.29	157	182	0.00013
TRINITY_DN22269_c2_g1::TRINITY_DN22269_c2_g1_i1::g.74098::m.74098	PF00004.29	157	182	0.00019
TRINITY_DN22254_c0_g2::TRINITY_DN22254_c0_g2_i1::g.72906::m.72906	PF00004.29	486	660	3.7e-05
TRINITY_DN22254_c0_g2::TRINITY_DN22254_c0_g2_i1::g.72906::m.72906	PF00004.29	1180	1192	3.7e-05
TRINITY_DN22254_c0_g2::TRINITY_DN22254_c0_g2_i1::g.72906::m.72906	PF00004.29	1267	1355	3.7e-05
TRINITY_DN22231_c1_g2::TRINITY_DN22231_c1_g2_i1::g.73798::m.73798	PF00004.29	573	595	0.00058
TRINITY_DN22231_c1_g2::TRINITY_DN22231_c1_g2_i1::g.73798::m.73798	PF00004.29	1316	1364	0.00058
TRINITY_DN22158_c1_g2::TRINITY_DN22158_c1_g2_i2::g.72474::m.72474	PF00004.29	167	279	1.6e-24
TRINITY_DN22158_c1_g2::TRINITY_DN22158_c1_g2_i2::g.72474::m.72474	PF00004.29	571	665	1.6e-24
TRINITY_DN22138_c2_g1::TRINITY_DN22138_c2_g1_i1::g.72726::m.72726	PF00004.29	269	312	2.2e-05
TRINITY_DN22138_c2_g1::TRINITY_DN22138_c2_g1_i1::g.72726::m.72726	PF00004.29	630	649	2.2e-05
TRINITY_DN22118_c0_g1::TRINITY_DN22118_c0_g1_i1::g.72580::m.72580	PF00004.29	317	466	2.4e-97
TRINITY_DN22118_c0_g1::TRINITY_DN22118_c0_g1_i1::g.72580::m.72580	PF00004.29	636	766	2.4e-97
TRINITY_DN22029_c0_g3::TRINITY_DN22029_c0_g3_i3::g.70226::m.70226	PF00004.29	276	333	1.4e-13
TRINITY_DN22029_c0_g3::TRINITY_DN22029_c0_g3_i2::g.70219::m.70219	PF00004.29	276	333	1.4e-13
TRINITY_DN22029_c0_g3::TRINITY_DN22029_c0_g3_i1::g.70213::m.70213	PF00004.29	276	333	1.4e-13
TRINITY_DN22029_c0_g1::TRINITY_DN22029_c0_g1_i5::g.70222::m.70222	PF00004.29	1	109	7e-42
TRINITY_DN22029_c0_g1::TRINITY_DN22029_c0_g1_i5::g.70222::m.70222	PF00004.29	250	366	7e-42
TRINITY_DN22029_c0_g1::TRINITY_DN22029_c0_g1_i4::g.70216::m.70216	PF00004.29	5	58	1.8e-26
TRINITY_DN22029_c0_g1::TRINITY_DN22029_c0_g1_i4::g.70216::m.70216	PF00004.29	199	315	1.8e-26
TRINITY_DN22029_c0_g1::TRINITY_DN22029_c0_g1_i3::g.70208::m.70208	PF00004.29	16	91	6.3e-32
TRINITY_DN22029_c0_g1::TRINITY_DN22029_c0_g1_i3::g.70208::m.70208	PF00004.29	232	348	6.3e-32
TRINITY_DN22029_c0_g1::TRINITY_DN22029_c0_g1_i2::g.70203::m.70203	PF00004.29	19	129	6.6e-42
TRINITY_DN22029_c0_g1::TRINITY_DN22029_c0_g1_i2::g.70203::m.70203	PF00004.29	270	386	6.6e-42
TRINITY_DN22029_c0_g1::TRINITY_DN22029_c0_g1_i1::g.70198::m.70198	PF00004.29	1	109	7e-42
TRINITY_DN22029_c0_g1::TRINITY_DN22029_c0_g1_i1::g.70198::m.70198	PF00004.29	250	366	7e-42
TRINITY_DN21994_c0_g1::TRINITY_DN21994_c0_g1_i4::g.69189::m.69189	PF00004.29	110	266	0.00011
TRINITY_DN21994_c0_g1::TRINITY_DN21994_c0_g1_i1::g.69168::m.69168	PF00004.29	110	266	0.00011
TRINITY_DN21966_c1_g1::TRINITY_DN21966_c1_g1_i2::g.69415::m.69415	PF00004.29	194	218	1.1e-22
TRINITY_DN21966_c1_g1::TRINITY_DN21966_c1_g1_i2::g.69415::m.69415	PF00004.29	648	784	1.1e-22
TRINITY_DN21966_c1_g1::TRINITY_DN21966_c1_g1_i1::g.69412::m.69412	PF00004.29	196	220	7.3e-23
TRINITY_DN21966_c1_g1::TRINITY_DN21966_c1_g1_i1::g.69412::m.69412	PF00004.29	650	786	7.3e-23
TRINITY_DN21865_c0_g1::TRINITY_DN21865_c0_g1_i1::g.67579::m.67579	PF00004.29	113	152	2.1e-07
TRINITY_DN21865_c0_g1::TRINITY_DN21865_c0_g1_i1::g.67579::m.67579	PF00004.29	433	555	2.1e-07
TRINITY_DN21813_c0_g1::TRINITY_DN21813_c0_g1_i4::g.67559::m.67559	PF00004.29	104	153	4.7e-10
TRINITY_DN21813_c0_g1::TRINITY_DN21813_c0_g1_i4::g.67559::m.67559	PF00004.29	303	345	4.7e-10
TRINITY_DN21813_c0_g1::TRINITY_DN21813_c0_g1_i2::g.67553::m.67553	PF00004.29	104	153	4.7e-10
TRINITY_DN21813_c0_g1::TRINITY_DN21813_c0_g1_i2::g.67553::m.67553	PF00004.29	303	345	4.7e-10
TRINITY_DN21805_c0_g1::TRINITY_DN21805_c0_g1_i8::g.68058::m.68058	PF00004.29	124	237	3.7e-13
TRINITY_DN21805_c0_g1::TRINITY_DN21805_c0_g1_i6::g.68053::m.68053	PF00004.29	124	194	2.8e-06
TRINITY_DN21805_c0_g1::TRINITY_DN21805_c0_g1_i5::g.68048::m.68048	PF00004.29	124	236	3.5e-13
TRINITY_DN21805_c0_g1::TRINITY_DN21805_c0_g1_i4::g.68041::m.68041	PF00004.29	124	237	1e-23
TRINITY_DN21805_c0_g1::TRINITY_DN21805_c0_g1_i4::g.68041::m.68041	PF00004.29	355	386	1e-23
TRINITY_DN21805_c0_g1::TRINITY_DN21805_c0_g1_i4::g.68041::m.68041	PF00004.29	426	442	1e-23
TRINITY_DN21805_c0_g1::TRINITY_DN21805_c0_g1_i4::g.68041::m.68041	PF00004.29	531	653	1e-23
TRINITY_DN21805_c0_g1::TRINITY_DN21805_c0_g1_i3::g.68037::m.68037	PF00004.29	124	237	3.8e-13
TRINITY_DN21805_c0_g1::TRINITY_DN21805_c0_g1_i2::g.68032::m.68032	PF00004.29	124	194	2.8e-06
TRINITY_DN21805_c0_g1::TRINITY_DN21805_c0_g1_i1::g.68025::m.68025	PF00004.29	124	237	1.6e-23
TRINITY_DN21805_c0_g1::TRINITY_DN21805_c0_g1_i1::g.68025::m.68025	PF00004.29	355	386	1.6e-23
TRINITY_DN21805_c0_g1::TRINITY_DN21805_c0_g1_i1::g.68025::m.68025	PF00004.29	426	442	1.6e-23
TRINITY_DN21805_c0_g1::TRINITY_DN21805_c0_g1_i1::g.68025::m.68025	PF00004.29	531	653	1.6e-23
TRINITY_DN21777_c1_g1::TRINITY_DN21777_c1_g1_i9::g.66989::m.66989	PF00004.29	798	855	7.5e-05
TRINITY_DN21777_c1_g1::TRINITY_DN21777_c1_g1_i9::g.66989::m.66989	PF00004.29	1082	1105	7.5e-05
TRINITY_DN21777_c1_g1::TRINITY_DN21777_c1_g1_i8::g.66979::m.66979	PF00004.29	784	841	7.3e-05
TRINITY_DN21777_c1_g1::TRINITY_DN21777_c1_g1_i8::g.66979::m.66979	PF00004.29	1068	1091	7.3e-05
TRINITY_DN21777_c1_g1::TRINITY_DN21777_c1_g1_i4::g.66970::m.66970	PF00004.29	784	841	7.3e-05
TRINITY_DN21777_c1_g1::TRINITY_DN21777_c1_g1_i4::g.66970::m.66970	PF00004.29	1068	1091	7.3e-05
TRINITY_DN21777_c1_g1::TRINITY_DN21777_c1_g1_i3::g.66964::m.66964	PF00004.29	798	855	7.5e-05
TRINITY_DN21777_c1_g1::TRINITY_DN21777_c1_g1_i3::g.66964::m.66964	PF00004.29	1082	1105	7.5e-05
TRINITY_DN21777_c1_g1::TRINITY_DN21777_c1_g1_i2::g.66958::m.66958	PF00004.29	784	841	7.3e-05
TRINITY_DN21777_c1_g1::TRINITY_DN21777_c1_g1_i2::g.66958::m.66958	PF00004.29	1068	1091	7.3e-05
TRINITY_DN21777_c1_g1::TRINITY_DN21777_c1_g1_i1::g.66948::m.66948	PF00004.29	798	855	7.5e-05
TRINITY_DN21777_c1_g1::TRINITY_DN21777_c1_g1_i1::g.66948::m.66948	PF00004.29	1082	1105	7.5e-05
TRINITY_DN21669_c0_g2::TRINITY_DN21669_c0_g2_i1::g.66296::m.66296	PF00004.29	283	318	2.3e-18
TRINITY_DN21669_c0_g2::TRINITY_DN21669_c0_g2_i1::g.66296::m.66296	PF00004.29	475	503	2.3e-18
TRINITY_DN21669_c0_g2::TRINITY_DN21669_c0_g2_i1::g.66296::m.66296	PF00004.29	742	776	2.3e-18
TRINITY_DN21669_c0_g2::TRINITY_DN21669_c0_g2_i1::g.66296::m.66296	PF00004.29	1055	1089	2.3e-18
TRINITY_DN21570_c0_g1::TRINITY_DN21570_c0_g1_i1::g.64625::m.64625	PF00004.29	251	382	1.8e-41
TRINITY_DN21334_c0_g1::TRINITY_DN21334_c0_g1_i1::g.63392::m.63392	PF00004.29	390	407	0.0001
TRINITY_DN21334_c0_g1::TRINITY_DN21334_c0_g1_i1::g.63392::m.63392	PF00004.29	731	754	0.0001
TRINITY_DN21294_c0_g1::TRINITY_DN21294_c0_g1_i5::g.62602::m.62602	PF00004.29	278	300	8.7e-25
TRINITY_DN21294_c0_g1::TRINITY_DN21294_c0_g1_i5::g.62602::m.62602	PF00004.29	397	534	8.7e-25
TRINITY_DN21294_c0_g1::TRINITY_DN21294_c0_g1_i4::g.62597::m.62597	PF00004.29	278	300	8.6e-25
TRINITY_DN21294_c0_g1::TRINITY_DN21294_c0_g1_i4::g.62597::m.62597	PF00004.29	397	534	8.6e-25
TRINITY_DN21294_c0_g1::TRINITY_DN21294_c0_g1_i3::g.62594::m.62594	PF00004.29	219	243	3.7e-08
TRINITY_DN21294_c0_g1::TRINITY_DN21294_c0_g1_i3::g.62594::m.62594	PF00004.29	339	375	3.7e-08
TRINITY_DN21294_c0_g1::TRINITY_DN21294_c0_g1_i2::g.62590::m.62590	PF00004.29	277	300	4.9e-08
TRINITY_DN21294_c0_g1::TRINITY_DN21294_c0_g1_i2::g.62590::m.62590	PF00004.29	397	433	4.9e-08
TRINITY_DN21294_c0_g1::TRINITY_DN21294_c0_g1_i1::g.62584::m.62584	PF00004.29	377	399	1e-24
TRINITY_DN21294_c0_g1::TRINITY_DN21294_c0_g1_i1::g.62584::m.62584	PF00004.29	496	633	1e-24
TRINITY_DN21164_c0_g1::TRINITY_DN21164_c0_g1_i1::g.61406::m.61406	PF00004.29	131	257	1.5e-34
TRINITY_DN20864_c0_g1::TRINITY_DN20864_c0_g1_i1::g.59147::m.59147	PF00004.29	23	47	0.00045
TRINITY_DN20864_c0_g1::TRINITY_DN20864_c0_g1_i1::g.59147::m.59147	PF00004.29	347	374	0.00045
TRINITY_DN20864_c0_g1::TRINITY_DN20864_c0_g1_i1::g.59147::m.59147	PF00004.29	714	792	0.00045
TRINITY_DN20757_c0_g1::TRINITY_DN20757_c0_g1_i3::g.58401::m.58401	PF00004.29	184	197	2.1e-05
TRINITY_DN20757_c0_g1::TRINITY_DN20757_c0_g1_i3::g.58401::m.58401	PF00004.29	704	791	2.1e-05
TRINITY_DN20751_c0_g1::TRINITY_DN20751_c0_g1_i6::g.58301::m.58301	PF00004.29	88	147	7.1e-05
TRINITY_DN20751_c0_g1::TRINITY_DN20751_c0_g1_i3::g.58285::m.58285	PF00004.29	88	147	7e-05
TRINITY_DN20751_c0_g1::TRINITY_DN20751_c0_g1_i2::g.58277::m.58277	PF00004.29	88	147	7e-05
TRINITY_DN20751_c0_g1::TRINITY_DN20751_c0_g1_i1::g.58269::m.58269	PF00004.29	88	147	7e-05
TRINITY_DN20726_c0_g1::TRINITY_DN20726_c0_g1_i1::g.58462::m.58462	PF00004.29	321	492	0.00043
TRINITY_DN20539_c0_g1::TRINITY_DN20539_c0_g1_i1::g.57046::m.57046	PF00004.29	300	342	0.00058
TRINITY_DN20539_c0_g1::TRINITY_DN20539_c0_g1_i1::g.57046::m.57046	PF00004.29	376	469	0.00058
TRINITY_DN20208_c0_g1::TRINITY_DN20208_c0_g1_i1::g.54819::m.54819	PF00004.29	14	41	9.1e-05
TRINITY_DN20208_c0_g1::TRINITY_DN20208_c0_g1_i1::g.54819::m.54819	PF00004.29	120	158	9.1e-05
TRINITY_DN20185_c0_g1::TRINITY_DN20185_c0_g1_i1::g.54316::m.54316	PF00004.29	161	222	5.6e-08
TRINITY_DN20185_c0_g1::TRINITY_DN20185_c0_g1_i1::g.54316::m.54316	PF00004.29	442	463	5.6e-08
TRINITY_DN20185_c0_g1::TRINITY_DN20185_c0_g1_i1::g.54316::m.54316	PF00004.29	638	665	5.6e-08
TRINITY_DN19722_c0_g1::TRINITY_DN19722_c0_g1_i1::g.51636::m.51636	PF00004.29	270	399	6.2e-97
TRINITY_DN19722_c0_g1::TRINITY_DN19722_c0_g1_i1::g.51636::m.51636	PF00004.29	543	675	6.2e-97
TRINITY_DN19672_c0_g1::TRINITY_DN19672_c0_g1_i1::g.50886::m.50886	PF00004.29	376	454	3e-16
TRINITY_DN19672_c0_g1::TRINITY_DN19672_c0_g1_i1::g.50886::m.50886	PF00004.29	567	612	3e-16
TRINITY_DN19663_c0_g1::TRINITY_DN19663_c0_g1_i1::g.51007::m.51007	PF00004.29	551	585	5.1e-06
TRINITY_DN19659_c2_g1::TRINITY_DN19659_c2_g1_i1::g.50790::m.50790	PF00004.29	316	445	1.3e-43
TRINITY_DN19659_c1_g1::TRINITY_DN19659_c1_g1_i2::g.50787::m.50787	PF00004.29	257	393	2.3e-41
TRINITY_DN19659_c1_g1::TRINITY_DN19659_c1_g1_i1::g.50785::m.50785	PF00004.29	4	54	3.8e-12
TRINITY_DN19659_c1_g1::TRINITY_DN19659_c1_g1_i1::g.50785::m.50785	PF00004.29	96	116	3.8e-12
TRINITY_DN19659_c0_g1::TRINITY_DN19659_c0_g1_i1::g.50781::m.50781	PF00004.29	234	297	2.1e-22
TRINITY_DN19420_c0_g1::TRINITY_DN19420_c0_g1_i1::g.49418::m.49418	PF00004.29	256	356	7.4e-32
TRINITY_DN19408_c0_g1::TRINITY_DN19408_c0_g1_i3::g.49445::m.49445	PF00004.29	462	578	4e-19
TRINITY_DN19408_c0_g1::TRINITY_DN19408_c0_g1_i1::g.49438::m.49438	PF00004.29	462	578	4e-19
TRINITY_DN19357_c0_g1::TRINITY_DN19357_c0_g1_i2::g.48867::m.48867	PF00004.29	207	339	6.6e-44
TRINITY_DN19357_c0_g1::TRINITY_DN19357_c0_g1_i1::g.48864::m.48864	PF00004.29	207	339	6.6e-44
TRINITY_DN19145_c0_g1::TRINITY_DN19145_c0_g1_i1::g.48014::m.48014	PF00004.29	126	256	3.4e-48
TRINITY_DN19122_c0_g1::TRINITY_DN19122_c0_g1_i1::g.47857::m.47857	PF00004.29	13	139	5.3e-23
TRINITY_DN18974_c0_g1::TRINITY_DN18974_c0_g1_i3::g.46661::m.46661	PF00004.29	352	477	5.1e-23
TRINITY_DN18951_c0_g1::TRINITY_DN18951_c0_g1_i3::g.46941::m.46941	PF00004.29	106	235	9.5e-36
TRINITY_DN18951_c0_g1::TRINITY_DN18951_c0_g1_i2::g.46936::m.46936	PF00004.29	106	235	9.5e-36
TRINITY_DN18874_c0_g1::TRINITY_DN18874_c0_g1_i1::g.46460::m.46460	PF00004.29	65	119	0.00051
TRINITY_DN18874_c0_g1::TRINITY_DN18874_c0_g1_i1::g.46460::m.46460	PF00004.29	300	330	0.00051
TRINITY_DN18874_c0_g1::TRINITY_DN18874_c0_g1_i1::g.46460::m.46460	PF00004.29	499	544	0.00051
TRINITY_DN18762_c0_g1::TRINITY_DN18762_c0_g1_i1::g.45811::m.45811	PF00004.29	92	221	7.6e-43
TRINITY_DN18453_c0_g1::TRINITY_DN18453_c0_g1_i1::g.44464::m.44464	PF00004.29	620	651	4.4e-11
TRINITY_DN18453_c0_g1::TRINITY_DN18453_c0_g1_i1::g.44464::m.44464	PF00004.29	898	920	4.4e-11
TRINITY_DN18453_c0_g1::TRINITY_DN18453_c0_g1_i1::g.44464::m.44464	PF00004.29	1282	1328	4.4e-11
TRINITY_DN18085_c0_g1::TRINITY_DN18085_c0_g1_i1::g.42144::m.42144	PF00004.29	35	140	1.3e-17
TRINITY_DN18060_c0_g1::TRINITY_DN18060_c0_g1_i1::g.42251::m.42251	PF00004.29	67	206	0.00096
TRINITY_DN18030_c0_g1::TRINITY_DN18030_c0_g1_i1::g.42134::m.42134	PF00004.29	18	46	2.7e-08
TRINITY_DN18030_c0_g1::TRINITY_DN18030_c0_g1_i1::g.42134::m.42134	PF00004.29	226	297	2.7e-08
TRINITY_DN18030_c0_g1::TRINITY_DN18030_c0_g1_i1::g.42134::m.42134	PF00004.29	493	527	2.7e-08
TRINITY_DN1794_c0_g1::TRINITY_DN1794_c0_g1_i1::g.2163::m.2163	PF00004.29	67	208	3.3e-33
TRINITY_DN17743_c0_g1::TRINITY_DN17743_c0_g1_i1::g.40860::m.40860	PF00004.29	96	202	0.00024
TRINITY_DN17638_c0_g1::TRINITY_DN17638_c0_g1_i1::g.40217::m.40217	PF00004.29	55	83	1.8e-06
TRINITY_DN17638_c0_g1::TRINITY_DN17638_c0_g1_i1::g.40217::m.40217	PF00004.29	126	149	1.8e-06
TRINITY_DN17638_c0_g1::TRINITY_DN17638_c0_g1_i1::g.40217::m.40217	PF00004.29	872	890	1.8e-06
TRINITY_DN17507_c0_g1::TRINITY_DN17507_c0_g1_i1::g.39904::m.39904	PF00004.29	72	209	6.6e-43
TRINITY_DN17376_c0_g1::TRINITY_DN17376_c0_g1_i2::g.38833::m.38833	PF00004.29	52	96	3.1e-06
TRINITY_DN17376_c0_g1::TRINITY_DN17376_c0_g1_i2::g.38833::m.38833	PF00004.29	128	275	3.1e-06
TRINITY_DN17376_c0_g1::TRINITY_DN17376_c0_g1_i1::g.38831::m.38831	PF00004.29	52	96	3.1e-06
TRINITY_DN17376_c0_g1::TRINITY_DN17376_c0_g1_i1::g.38831::m.38831	PF00004.29	128	275	3.1e-06
TRINITY_DN17335_c0_g1::TRINITY_DN17335_c0_g1_i1::g.39080::m.39080	PF00004.29	249	269	0.00028
TRINITY_DN17129_c0_g1::TRINITY_DN17129_c0_g1_i1::g.37780::m.37780	PF00004.29	188	319	5.3e-37
TRINITY_DN17094_c0_g1::TRINITY_DN17094_c0_g1_i1::g.37606::m.37606	PF00004.29	107	161	6.6e-15
TRINITY_DN17094_c0_g1::TRINITY_DN17094_c0_g1_i1::g.37606::m.37606	PF00004.29	280	383	6.6e-15
TRINITY_DN16865_c1_g1::TRINITY_DN16865_c1_g1_i1::g.36497::m.36497	PF00004.29	99	148	1.9e-09
TRINITY_DN16749_c0_g1::TRINITY_DN16749_c0_g1_i1::g.36010::m.36010	PF00004.29	45	175	8.2e-41
TRINITY_DN16607_c0_g1::TRINITY_DN16607_c0_g1_i1::g.35676::m.35676	PF00004.29	192	217	0.00039
TRINITY_DN16607_c0_g1::TRINITY_DN16607_c0_g1_i1::g.35676::m.35676	PF00004.29	244	317	0.00039
TRINITY_DN16607_c0_g1::TRINITY_DN16607_c0_g1_i1::g.35676::m.35676	PF00004.29	448	491	0.00039
TRINITY_DN16504_c0_g1::TRINITY_DN16504_c0_g1_i1::g.35641::m.35641	PF00004.29	48	117	7.4e-47
TRINITY_DN16504_c0_g1::TRINITY_DN16504_c0_g1_i1::g.35641::m.35641	PF00004.29	196	328	7.4e-47
TRINITY_DN16376_c0_g1::TRINITY_DN16376_c0_g1_i1::g.34733::m.34733	PF00004.29	527	544	4.5e-40
TRINITY_DN16376_c0_g1::TRINITY_DN16376_c0_g1_i1::g.34733::m.34733	PF00004.29	1561	1686	4.5e-40
TRINITY_DN16376_c0_g1::TRINITY_DN16376_c0_g1_i1::g.34733::m.34733	PF00004.29	1840	1951	4.5e-40
TRINITY_DN16376_c0_g1::TRINITY_DN16376_c0_g1_i1::g.34733::m.34733	PF00004.29	2119	2224	4.5e-40
TRINITY_DN16376_c0_g1::TRINITY_DN16376_c0_g1_i1::g.34733::m.34733	PF00004.29	2475	2512	4.5e-40
TRINITY_DN16198_c0_g1::TRINITY_DN16198_c0_g1_i1::g.33874::m.33874	PF00004.29	88	109	5.1e-05
TRINITY_DN16198_c0_g1::TRINITY_DN16198_c0_g1_i1::g.33874::m.33874	PF00004.29	402	459	5.1e-05
TRINITY_DN16066_c0_g1::TRINITY_DN16066_c0_g1_i2::g.33488::m.33488	PF00004.29	30	152	9.7e-23
TRINITY_DN16066_c0_g1::TRINITY_DN16066_c0_g1_i1::g.33485::m.33485	PF00004.29	189	334	1.4e-33
TRINITY_DN15826_c0_g1::TRINITY_DN15826_c0_g1_i1::g.32374::m.32374	PF00004.29	104	226	2.4e-16
TRINITY_DN15550_c0_g1::TRINITY_DN15550_c0_g1_i2::g.31420::m.31420	PF00004.29	8	36	0.00023
TRINITY_DN15550_c0_g1::TRINITY_DN15550_c0_g1_i1::g.31415::m.31415	PF00004.29	8	36	0.00023
TRINITY_DN14815_c0_g1::TRINITY_DN14815_c0_g1_i1::g.28984::m.28984	PF00004.29	173	306	2.6e-42
TRINITY_DN14748_c0_g1::TRINITY_DN14748_c0_g1_i1::g.28409::m.28409	PF00004.29	10	31	0.00086
TRINITY_DN14748_c0_g1::TRINITY_DN14748_c0_g1_i1::g.28409::m.28409	PF00004.29	302	328	0.00086
TRINITY_DN14297_c0_g1::TRINITY_DN14297_c0_g1_i1::g.26841::m.26841	PF00004.29	265	397	4.1e-41
TRINITY_DN14297_c0_g1::TRINITY_DN14297_c0_g1_i1::g.26841::m.26841	PF00004.29	439	465	4.1e-41
TRINITY_DN14020_c0_g1::TRINITY_DN14020_c0_g1_i1::g.26057::m.26057	PF00004.29	88	205	1.4e-17
TRINITY_DN13368_c0_g1::TRINITY_DN13368_c0_g1_i1::g.23800::m.23800	PF00004.29	182	348	9.5e-05
TRINITY_DN13313_c0_g1::TRINITY_DN13313_c0_g1_i1::g.23829::m.23829	PF00004.29	85	208	7.3e-16
TRINITY_DN12982_c0_g1::TRINITY_DN12982_c0_g1_i2::g.22862::m.22862	PF00004.29	9	122	1e-13
TRINITY_DN12819_c0_g1::TRINITY_DN12819_c0_g1_i1::g.22545::m.22545	PF00004.29	176	295	2e-07
TRINITY_DN12523_c0_g1::TRINITY_DN12523_c0_g1_i1::g.21609::m.21609	PF00004.29	1	103	7.3e-29
TRINITY_DN12461_c0_g1::TRINITY_DN12461_c0_g1_i1::g.21264::m.21264	PF00004.29	1	152	1.2e-20
TRINITY_DN12461_c0_g1::TRINITY_DN12461_c0_g1_i1::g.21264::m.21264	PF00004.29	337	375	1.2e-20
TRINITY_DN12363_c0_g1::TRINITY_DN12363_c0_g1_i1::g.21056::m.21056	PF00004.29	78	104	6.6e-06
TRINITY_DN12167_c0_g1::TRINITY_DN12167_c0_g1_i1::g.20435::m.20435	PF00004.29	407	589	0.00022
TRINITY_DN11513_c0_g1::TRINITY_DN11513_c0_g1_i1::g.18787::m.18787	PF00004.29	264	333	2.2e-07
TRINITY_DN11200_c0_g1::TRINITY_DN11200_c0_g1_i1::g.17998::m.17998	PF00004.29	82	95	0.00018
TRINITY_DN11200_c0_g1::TRINITY_DN11200_c0_g1_i1::g.17998::m.17998	PF00004.29	299	320	0.00018
TRINITY_DN10592_c0_g1::TRINITY_DN10592_c0_g1_i1::g.16222::m.16222	PF00004.29	149	237	0.00095
TRINITY_DN9878_c0_g1::TRINITY_DN9878_c0_g1_i1::g.14746::m.14746	PF00005.27	369	519	2.6e-31
TRINITY_DN9713_c0_g1::TRINITY_DN9713_c0_g1_i1::g.14290::m.14290	PF00005.27	31	175	5.6e-29
TRINITY_DN9540_c0_g1::TRINITY_DN9540_c0_g1_i1::g.13813::m.13813	PF00005.27	199	242	1e-09
TRINITY_DN9531_c0_g1::TRINITY_DN9531_c0_g1_i1::g.13783::m.13783	PF00005.27	111	149	6.7e-08
TRINITY_DN9531_c0_g1::TRINITY_DN9531_c0_g1_i1::g.13783::m.13783	PF00005.27	300	339	6.7e-08
TRINITY_DN9077_c0_g1::TRINITY_DN9077_c0_g1_i1::g.12755::m.12755	PF00005.27	5	94	1.6e-15
TRINITY_DN7075_c0_g1::TRINITY_DN7075_c0_g1_i1::g.9493::m.9493	PF00005.27	50	84	0.00012
TRINITY_DN7075_c0_g1::TRINITY_DN7075_c0_g1_i1::g.9493::m.9493	PF00005.27	125	155	0.00012
TRINITY_DN7057_c0_g1::TRINITY_DN7057_c0_g1_i1::g.9602::m.9602	PF00005.27	17	57	1.5e-07
TRINITY_DN6598_c0_g1::TRINITY_DN6598_c0_g1_i1::g.8650::m.8650	PF00005.27	193	212	0.00017
TRINITY_DN6598_c0_g1::TRINITY_DN6598_c0_g1_i1::g.8650::m.8650	PF00005.27	475	497	0.00017
TRINITY_DN568_c0_g1::TRINITY_DN568_c0_g1_i1::g.767::m.767	PF00005.27	1	110	9.2e-09
TRINITY_DN5398_c0_g1::TRINITY_DN5398_c0_g1_i1::g.6834::m.6834	PF00005.27	39	182	4.1e-30
TRINITY_DN4730_c0_g1::TRINITY_DN4730_c0_g1_i1::g.5945::m.5945	PF00005.27	47	74	0.00013
TRINITY_DN4730_c0_g1::TRINITY_DN4730_c0_g1_i1::g.5945::m.5945	PF00005.27	275	285	0.00013
TRINITY_DN3507_c0_g1::TRINITY_DN3507_c0_g1_i1::g.4369::m.4369	PF00005.27	174	299	4.5e-22
TRINITY_DN33778_c0_g1::TRINITY_DN33778_c0_g1_i1::g.85083::m.85083	PF00005.27	93	132	0.00057
TRINITY_DN32188_c0_g1::TRINITY_DN32188_c0_g1_i1::g.83518::m.83518	PF00005.27	14	50	3.6e-05
TRINITY_DN31813_c0_g1::TRINITY_DN31813_c0_g1_i1::g.83390::m.83390	PF00005.27	5	134	4.6e-15
TRINITY_DN30546_c0_g1::TRINITY_DN30546_c0_g1_i1::g.82103::m.82103	PF00005.27	37	99	1e-09
TRINITY_DN30438_c0_g1::TRINITY_DN30438_c0_g1_i1::g.81977::m.81977	PF00005.27	9	72	9e-08
TRINITY_DN29714_c0_g1::TRINITY_DN29714_c0_g1_i1::g.81401::m.81401	PF00005.27	37	139	1.9e-17
TRINITY_DN28938_c0_g1::TRINITY_DN28938_c0_g1_i1::g.80704::m.80704	PF00005.27	38	111	6.4e-15
TRINITY_DN28611_c0_g1::TRINITY_DN28611_c0_g1_i1::g.80337::m.80337	PF00005.27	1	138	1.1e-18
TRINITY_DN2817_c0_g1::TRINITY_DN2817_c0_g1_i1::g.3540::m.3540	PF00005.27	66	160	1.7e-17
TRINITY_DN27711_c0_g1::TRINITY_DN27711_c0_g1_i1::g.79507::m.79507	PF00005.27	118	154	0.00038
TRINITY_DN27465_c0_g1::TRINITY_DN27465_c0_g1_i1::g.79325::m.79325	PF00005.27	65	87	2.3e-05
TRINITY_DN27243_c0_g1::TRINITY_DN27243_c0_g1_i1::g.79091::m.79091	PF00005.27	1	121	7.2e-19
TRINITY_DN26802_c0_g1::TRINITY_DN26802_c0_g1_i1::g.78760::m.78760	PF00005.27	23	154	1.3e-20
TRINITY_DN26463_c0_g1::TRINITY_DN26463_c0_g1_i1::g.78251::m.78251	PF00005.27	70	100	2.5e-07
TRINITY_DN2520_c0_g1::TRINITY_DN2520_c0_g1_i1::g.3068::m.3068	PF00005.27	3	25	0.00099
TRINITY_DN2506_c0_g1::TRINITY_DN2506_c0_g1_i1::g.3050::m.3050	PF00005.27	1	138	6e-26
TRINITY_DN24262_c0_g1::TRINITY_DN24262_c0_g1_i1::g.76278::m.76278	PF00005.27	39	39	0.001
TRINITY_DN24262_c0_g1::TRINITY_DN24262_c0_g1_i1::g.76278::m.76278	PF00005.27	95	119	0.001
TRINITY_DN24189_c0_g1::TRINITY_DN24189_c0_g1_i1::g.76149::m.76149	PF00005.27	4	103	1.7e-17
TRINITY_DN2299_c0_g1::TRINITY_DN2299_c0_g1_i1::g.2743::m.2743	PF00005.27	145	221	3.1e-14
TRINITY_DN22361_c0_g1::TRINITY_DN22361_c0_g1_i1::g.74339::m.74339	PF00005.27	78	107	0.0003
TRINITY_DN22258_c2_g3::TRINITY_DN22258_c2_g3_i1::g.73778::m.73778	PF00005.27	35	86	1.1e-22
TRINITY_DN22258_c2_g3::TRINITY_DN22258_c2_g3_i1::g.73778::m.73778	PF00005.27	201	262	1.1e-22
TRINITY_DN22258_c2_g1::TRINITY_DN22258_c2_g1_i1::g.73772::m.73772	PF00005.27	41	120	1.7e-11
TRINITY_DN22258_c2_g1::TRINITY_DN22258_c2_g1_i1::g.73772::m.73772	PF00005.27	147	194	1.7e-11
TRINITY_DN22256_c0_g1::TRINITY_DN22256_c0_g1_i1::g.73817::m.73817	PF00005.27	516	657	3.9e-54
TRINITY_DN22256_c0_g1::TRINITY_DN22256_c0_g1_i1::g.73817::m.73817	PF00005.27	1730	1872	3.9e-54
TRINITY_DN22254_c0_g2::TRINITY_DN22254_c0_g2_i1::g.72906::m.72906	PF00005.27	474	624	3.1e-69
TRINITY_DN22254_c0_g2::TRINITY_DN22254_c0_g2_i1::g.72906::m.72906	PF00005.27	1166	1324	3.1e-69
TRINITY_DN22254_c0_g1::TRINITY_DN22254_c0_g1_i1::g.72904::m.72904	PF00005.27	1	31	1.8e-10
TRINITY_DN22231_c1_g2::TRINITY_DN22231_c1_g2_i1::g.73798::m.73798	PF00005.27	559	693	1.3e-51
TRINITY_DN22231_c1_g2::TRINITY_DN22231_c1_g2_i1::g.73798::m.73798	PF00005.27	1207	1359	1.3e-51
TRINITY_DN22165_c0_g1::TRINITY_DN22165_c0_g1_i1::g.72711::m.72711	PF00005.27	513	672	4.9e-48
TRINITY_DN22165_c0_g1::TRINITY_DN22165_c0_g1_i1::g.72711::m.72711	PF00005.27	1338	1485	4.9e-48
TRINITY_DN22158_c1_g2::TRINITY_DN22158_c1_g2_i2::g.72474::m.72474	PF00005.27	167	186	0.00039
TRINITY_DN22158_c1_g2::TRINITY_DN22158_c1_g2_i2::g.72474::m.72474	PF00005.27	391	427	0.00039
TRINITY_DN22158_c1_g2::TRINITY_DN22158_c1_g2_i2::g.72474::m.72474	PF00005.27	571	597	0.00039
TRINITY_DN22138_c2_g1::TRINITY_DN22138_c2_g1_i1::g.72726::m.72726	PF00005.27	255	426	6e-43
TRINITY_DN22138_c2_g1::TRINITY_DN22138_c2_g1_i1::g.72726::m.72726	PF00005.27	618	753	6e-43
TRINITY_DN22122_c0_g1::TRINITY_DN22122_c0_g1_i1::g.71518::m.71518	PF00005.27	596	738	2.1e-54
TRINITY_DN22122_c0_g1::TRINITY_DN22122_c0_g1_i1::g.71518::m.71518	PF00005.27	1539	1680	2.1e-54
TRINITY_DN22118_c0_g1::TRINITY_DN22118_c0_g1_i1::g.72580::m.72580	PF00005.27	310	338	2.8e-06
TRINITY_DN22118_c0_g1::TRINITY_DN22118_c0_g1_i1::g.72580::m.72580	PF00005.27	632	657	2.8e-06
TRINITY_DN22116_c1_g2::TRINITY_DN22116_c1_g2_i1::g.72245::m.72245	PF00005.27	12	53	2e-05
TRINITY_DN22112_c0_g1::TRINITY_DN22112_c0_g1_i3::g.71456::m.71456	PF00005.27	461	610	7.3e-35
TRINITY_DN22112_c0_g1::TRINITY_DN22112_c0_g1_i3::g.71456::m.71456	PF00005.27	1136	1287	7.3e-35
TRINITY_DN22112_c0_g1::TRINITY_DN22112_c0_g1_i2::g.71453::m.71453	PF00005.27	325	333	9.8e-07
TRINITY_DN22112_c0_g1::TRINITY_DN22112_c0_g1_i2::g.71453::m.71453	PF00005.27	384	424	9.8e-07
TRINITY_DN22112_c0_g1::TRINITY_DN22112_c0_g1_i1::g.71447::m.71447	PF00005.27	461	610	7.3e-35
TRINITY_DN22112_c0_g1::TRINITY_DN22112_c0_g1_i1::g.71447::m.71447	PF00005.27	1136	1287	7.3e-35
TRINITY_DN22085_c1_g1::TRINITY_DN22085_c1_g1_i1::g.70407::m.70407	PF00005.27	631	793	1.6e-26
TRINITY_DN21951_c6_g3::TRINITY_DN21951_c6_g3_i1::g.69828::m.69828	PF00005.27	11	54	0.00042
TRINITY_DN21936_c0_g1::TRINITY_DN21936_c0_g1_i5::g.69686::m.69686	PF00005.27	65	204	2.6e-27
TRINITY_DN21936_c0_g1::TRINITY_DN21936_c0_g1_i4::g.69684::m.69684	PF00005.27	63	202	2.6e-27
TRINITY_DN21936_c0_g1::TRINITY_DN21936_c0_g1_i3::g.69677::m.69677	PF00005.27	588	727	1.7e-55
TRINITY_DN21936_c0_g1::TRINITY_DN21936_c0_g1_i3::g.69677::m.69677	PF00005.27	1506	1647	1.7e-55
TRINITY_DN21936_c0_g1::TRINITY_DN21936_c0_g1_i2::g.69674::m.69674	PF00005.27	31	76	1.2e-27
TRINITY_DN21936_c0_g1::TRINITY_DN21936_c0_g1_i2::g.69674::m.69674	PF00005.27	94	233	1.2e-27
TRINITY_DN21936_c0_g1::TRINITY_DN21936_c0_g1_i1::g.69667::m.69667	PF00005.27	588	727	1.7e-55
TRINITY_DN21936_c0_g1::TRINITY_DN21936_c0_g1_i1::g.69667::m.69667	PF00005.27	1506	1647	1.7e-55
TRINITY_DN21865_c0_g1::TRINITY_DN21865_c0_g1_i1::g.67579::m.67579	PF00005.27	102	265	1.1e-44
TRINITY_DN21865_c0_g1::TRINITY_DN21865_c0_g1_i1::g.67579::m.67579	PF00005.27	424	558	1.1e-44
TRINITY_DN21805_c0_g1::TRINITY_DN21805_c0_g1_i4::g.68041::m.68041	PF00005.27	124	144	0.00039
TRINITY_DN21805_c0_g1::TRINITY_DN21805_c0_g1_i4::g.68041::m.68041	PF00005.27	248	263	0.00039
TRINITY_DN21805_c0_g1::TRINITY_DN21805_c0_g1_i4::g.68041::m.68041	PF00005.27	358	383	0.00039
TRINITY_DN21805_c0_g1::TRINITY_DN21805_c0_g1_i4::g.68041::m.68041	PF00005.27	530	562	0.00039
TRINITY_DN21805_c0_g1::TRINITY_DN21805_c0_g1_i1::g.68025::m.68025	PF00005.27	124	144	0.00075
TRINITY_DN21805_c0_g1::TRINITY_DN21805_c0_g1_i1::g.68025::m.68025	PF00005.27	248	263	0.00075
TRINITY_DN21805_c0_g1::TRINITY_DN21805_c0_g1_i1::g.68025::m.68025	PF00005.27	358	383	0.00075
TRINITY_DN21805_c0_g1::TRINITY_DN21805_c0_g1_i1::g.68025::m.68025	PF00005.27	530	562	0.00075
TRINITY_DN21777_c1_g1::TRINITY_DN21777_c1_g1_i9::g.66989::m.66989	PF00005.27	785	927	5.9e-45
TRINITY_DN21777_c1_g1::TRINITY_DN21777_c1_g1_i9::g.66989::m.66989	PF00005.27	1069	1303	5.9e-45
TRINITY_DN21777_c1_g1::TRINITY_DN21777_c1_g1_i8::g.66979::m.66979	PF00005.27	771	913	5.7e-45
TRINITY_DN21777_c1_g1::TRINITY_DN21777_c1_g1_i8::g.66979::m.66979	PF00005.27	1055	1289	5.7e-45
TRINITY_DN21777_c1_g1::TRINITY_DN21777_c1_g1_i7::g.66975::m.66975	PF00005.27	458	587	1e-12
TRINITY_DN21777_c1_g1::TRINITY_DN21777_c1_g1_i4::g.66970::m.66970	PF00005.27	771	913	5.7e-45
TRINITY_DN21777_c1_g1::TRINITY_DN21777_c1_g1_i4::g.66970::m.66970	PF00005.27	1055	1289	5.7e-45
TRINITY_DN21777_c1_g1::TRINITY_DN21777_c1_g1_i3::g.66964::m.66964	PF00005.27	785	927	5.9e-45
TRINITY_DN21777_c1_g1::TRINITY_DN21777_c1_g1_i3::g.66964::m.66964	PF00005.27	1069	1303	5.9e-45
TRINITY_DN21777_c1_g1::TRINITY_DN21777_c1_g1_i2::g.66958::m.66958	PF00005.27	771	913	5.7e-45
TRINITY_DN21777_c1_g1::TRINITY_DN21777_c1_g1_i2::g.66958::m.66958	PF00005.27	1055	1289	5.7e-45
TRINITY_DN21777_c1_g1::TRINITY_DN21777_c1_g1_i1::g.66948::m.66948	PF00005.27	785	927	5.9e-45
TRINITY_DN21777_c1_g1::TRINITY_DN21777_c1_g1_i1::g.66948::m.66948	PF00005.27	1069	1303	5.9e-45
TRINITY_DN21742_c0_g1::TRINITY_DN21742_c0_g1_i3::g.67201::m.67201	PF00005.27	387	538	5.7e-27
TRINITY_DN21742_c0_g1::TRINITY_DN21742_c0_g1_i1::g.67196::m.67196	PF00005.27	467	618	7.1e-27
TRINITY_DN21726_c0_g1::TRINITY_DN21726_c0_g1_i1::g.67032::m.67032	PF00005.27	215	364	1.8e-22
TRINITY_DN21712_c0_g1::TRINITY_DN21712_c0_g1_i1::g.66748::m.66748	PF00005.27	483	618	5e-19
TRINITY_DN21709_c0_g1::TRINITY_DN21709_c0_g1_i1::g.66878::m.66878	PF00005.27	434	582	3.1e-28
TRINITY_DN21669_c0_g2::TRINITY_DN21669_c0_g2_i1::g.66296::m.66296	PF00005.27	276	346	2.7e-12
TRINITY_DN21669_c0_g2::TRINITY_DN21669_c0_g2_i1::g.66296::m.66296	PF00005.27	744	763	2.7e-12
TRINITY_DN21669_c0_g2::TRINITY_DN21669_c0_g2_i1::g.66296::m.66296	PF00005.27	1042	1074	2.7e-12
TRINITY_DN21561_c0_g1::TRINITY_DN21561_c0_g1_i1::g.65038::m.65038	PF00005.27	466	625	1e-38
TRINITY_DN21561_c0_g1::TRINITY_DN21561_c0_g1_i1::g.65038::m.65038	PF00005.27	1178	1261	1e-38
TRINITY_DN21451_c0_g1::TRINITY_DN21451_c0_g1_i2::g.64399::m.64399	PF00005.27	39	171	9.2e-45
TRINITY_DN21451_c0_g1::TRINITY_DN21451_c0_g1_i2::g.64399::m.64399	PF00005.27	738	891	9.2e-45
TRINITY_DN21424_c0_g1::TRINITY_DN21424_c0_g1_i1::g.63746::m.63746	PF00005.27	77	104	2e-07
TRINITY_DN21424_c0_g1::TRINITY_DN21424_c0_g1_i1::g.63746::m.63746	PF00005.27	350	406	2e-07
TRINITY_DN21334_c0_g1::TRINITY_DN21334_c0_g1_i1::g.63392::m.63392	PF00005.27	376	545	1.6e-49
TRINITY_DN21334_c0_g1::TRINITY_DN21334_c0_g1_i1::g.63392::m.63392	PF00005.27	608	629	1.6e-49
TRINITY_DN21334_c0_g1::TRINITY_DN21334_c0_g1_i1::g.63392::m.63392	PF00005.27	718	848	1.6e-49
TRINITY_DN21284_c0_g1::TRINITY_DN21284_c0_g1_i1::g.62674::m.62674	PF00005.27	628	790	1e-26
TRINITY_DN21187_c1_g1::TRINITY_DN21187_c1_g1_i1::g.61393::m.61393	PF00005.27	522	656	1.1e-53
TRINITY_DN21187_c1_g1::TRINITY_DN21187_c1_g1_i1::g.61393::m.61393	PF00005.27	1136	1288	1.1e-53
TRINITY_DN21082_c0_g1::TRINITY_DN21082_c0_g1_i4::g.60802::m.60802	PF00005.27	7	28	0.0003
TRINITY_DN21082_c0_g1::TRINITY_DN21082_c0_g1_i3::g.60795::m.60795	PF00005.27	653	787	4.1e-50
TRINITY_DN21082_c0_g1::TRINITY_DN21082_c0_g1_i3::g.60795::m.60795	PF00005.27	1290	1437	4.1e-50
TRINITY_DN21020_c0_g2::TRINITY_DN21020_c0_g2_i1::g.60359::m.60359	PF00005.27	24	177	4.3e-27
TRINITY_DN21019_c0_g1::TRINITY_DN21019_c0_g1_i2::g.60761::m.60761	PF00005.27	137	288	2e-28
TRINITY_DN21019_c0_g1::TRINITY_DN21019_c0_g1_i1::g.60755::m.60755	PF00005.27	137	288	2e-28
TRINITY_DN20741_c0_g1::TRINITY_DN20741_c0_g1_i2::g.58645::m.58645	PF00005.27	549	701	1.8e-33
TRINITY_DN20741_c0_g1::TRINITY_DN20741_c0_g1_i1::g.58640::m.58640	PF00005.27	83	235	3.4e-34
TRINITY_DN20726_c0_g1::TRINITY_DN20726_c0_g1_i1::g.58462::m.58462	PF00005.27	161	183	1.9e-31
TRINITY_DN20726_c0_g1::TRINITY_DN20726_c0_g1_i1::g.58462::m.58462	PF00005.27	307	456	1.9e-31
TRINITY_DN20697_c0_g1::TRINITY_DN20697_c0_g1_i1::g.57558::m.57558	PF00005.27	458	534	5.9e-17
TRINITY_DN20641_c1_g1::TRINITY_DN20641_c1_g1_i1::g.57930::m.57930	PF00005.27	1	130	7.4e-15
TRINITY_DN20355_c0_g1::TRINITY_DN20355_c0_g1_i1::g.55811::m.55811	PF00005.27	640	783	8.6e-30
TRINITY_DN20185_c0_g1::TRINITY_DN20185_c0_g1_i1::g.54316::m.54316	PF00005.27	155	299	7e-39
TRINITY_DN20185_c0_g1::TRINITY_DN20185_c0_g1_i1::g.54316::m.54316	PF00005.27	431	562	7e-39
TRINITY_DN20117_c0_g1::TRINITY_DN20117_c0_g1_i1::g.54153::m.54153	PF00005.27	510	659	2.2e-35
TRINITY_DN20077_c0_g1::TRINITY_DN20077_c0_g1_i1::g.53642::m.53642	PF00005.27	748	888	3.9e-17
TRINITY_DN20067_c0_g1::TRINITY_DN20067_c0_g1_i1::g.53942::m.53942	PF00005.27	83	231	3.6e-28
TRINITY_DN19888_c0_g1::TRINITY_DN19888_c0_g1_i1::g.52242::m.52242	PF00005.27	531	679	9.3e-36
TRINITY_DN19769_c0_g1::TRINITY_DN19769_c0_g1_i1::g.51562::m.51562	PF00005.27	44	179	3.2e-17
TRINITY_DN19743_c0_g1::TRINITY_DN19743_c0_g1_i1::g.51550::m.51550	PF00005.27	144	164	3.8e-07
TRINITY_DN19743_c0_g1::TRINITY_DN19743_c0_g1_i1::g.51550::m.51550	PF00005.27	194	235	3.8e-07
TRINITY_DN19743_c0_g1::TRINITY_DN19743_c0_g1_i1::g.51550::m.51550	PF00005.27	426	443	3.8e-07
TRINITY_DN19743_c0_g1::TRINITY_DN19743_c0_g1_i1::g.51550::m.51550	PF00005.27	487	506	3.8e-07
TRINITY_DN19722_c0_g1::TRINITY_DN19722_c0_g1_i1::g.51636::m.51636	PF00005.27	262	290	2.2e-05
TRINITY_DN19722_c0_g1::TRINITY_DN19722_c0_g1_i1::g.51636::m.51636	PF00005.27	535	565	2.2e-05
TRINITY_DN19705_c0_g1::TRINITY_DN19705_c0_g1_i1::g.51656::m.51656	PF00005.27	89	241	1.5e-26
TRINITY_DN19513_c0_g1::TRINITY_DN19513_c0_g1_i1::g.50077::m.50077	PF00005.27	171	325	5.7e-23
TRINITY_DN19301_c0_g1::TRINITY_DN19301_c0_g1_i1::g.49307::m.49307	PF00005.27	69	111	0.00017
TRINITY_DN19142_c0_g1::TRINITY_DN19142_c0_g1_i1::g.48025::m.48025	PF00005.27	18	145	4.6e-40
TRINITY_DN19142_c0_g1::TRINITY_DN19142_c0_g1_i1::g.48025::m.48025	PF00005.27	650	857	4.6e-40
TRINITY_DN18645_c0_g1::TRINITY_DN18645_c0_g1_i1::g.45028::m.45028	PF00005.27	34	169	7.1e-43
TRINITY_DN18645_c0_g1::TRINITY_DN18645_c0_g1_i1::g.45028::m.45028	PF00005.27	756	919	7.1e-43
TRINITY_DN18555_c0_g1::TRINITY_DN18555_c0_g1_i1::g.44799::m.44799	PF00005.27	31	175	2.8e-17
TRINITY_DN18453_c0_g1::TRINITY_DN18453_c0_g1_i1::g.44464::m.44464	PF00005.27	621	634	0.00067
TRINITY_DN18453_c0_g1::TRINITY_DN18453_c0_g1_i1::g.44464::m.44464	PF00005.27	898	923	0.00067
TRINITY_DN18453_c0_g1::TRINITY_DN18453_c0_g1_i1::g.44464::m.44464	PF00005.27	1282	1299	0.00067
TRINITY_DN18110_c0_g1::TRINITY_DN18110_c0_g1_i3::g.42610::m.42610	PF00005.27	5	147	1.7e-27
TRINITY_DN18110_c0_g1::TRINITY_DN18110_c0_g1_i1::g.42601::m.42601	PF00005.27	5	147	1.7e-27
TRINITY_DN18030_c0_g1::TRINITY_DN18030_c0_g1_i1::g.42134::m.42134	PF00005.27	9	52	9.2e-07
TRINITY_DN18030_c0_g1::TRINITY_DN18030_c0_g1_i1::g.42134::m.42134	PF00005.27	493	515	9.2e-07
TRINITY_DN18013_c0_g1::TRINITY_DN18013_c0_g1_i2::g.42101::m.42101	PF00005.27	69	224	3.1e-20
TRINITY_DN18013_c0_g1::TRINITY_DN18013_c0_g1_i1::g.42098::m.42098	PF00005.27	103	258	3.9e-20
TRINITY_DN17709_c0_g1::TRINITY_DN17709_c0_g1_i1::g.40600::m.40600	PF00005.27	108	258	2.6e-24
TRINITY_DN17684_c0_g1::TRINITY_DN17684_c0_g1_i1::g.40357::m.40357	PF00005.27	167	322	5.3e-29
TRINITY_DN17638_c0_g1::TRINITY_DN17638_c0_g1_i1::g.40217::m.40217	PF00005.27	114	288	6.9e-38
TRINITY_DN17638_c0_g1::TRINITY_DN17638_c0_g1_i1::g.40217::m.40217	PF00005.27	857	1004	6.9e-38
TRINITY_DN17596_c0_g1::TRINITY_DN17596_c0_g1_i1::g.39850::m.39850	PF00005.27	1	139	2.8e-19
TRINITY_DN17440_c0_g1::TRINITY_DN17440_c0_g1_i1::g.39611::m.39611	PF00005.27	221	374	8.4e-29
TRINITY_DN17009_c0_g1::TRINITY_DN17009_c0_g1_i1::g.37482::m.37482	PF00005.27	448	598	3.6e-33
TRINITY_DN16990_c0_g1::TRINITY_DN16990_c0_g1_i1::g.37274::m.37274	PF00005.27	424	567	4.2e-24
TRINITY_DN16376_c0_g1::TRINITY_DN16376_c0_g1_i1::g.34733::m.34733	PF00005.27	528	538	0.00035
TRINITY_DN16376_c0_g1::TRINITY_DN16376_c0_g1_i1::g.34733::m.34733	PF00005.27	1560	1635	0.00035
TRINITY_DN16376_c0_g1::TRINITY_DN16376_c0_g1_i1::g.34733::m.34733	PF00005.27	1839	1870	0.00035
TRINITY_DN16376_c0_g1::TRINITY_DN16376_c0_g1_i1::g.34733::m.34733	PF00005.27	2119	2134	0.00035
TRINITY_DN16337_c0_g1::TRINITY_DN16337_c0_g1_i2::g.34745::m.34745	PF00005.27	442	594	3.6e-19
TRINITY_DN16337_c0_g1::TRINITY_DN16337_c0_g1_i2::g.34745::m.34745	PF00005.27	639	665	3.6e-19
TRINITY_DN16337_c0_g1::TRINITY_DN16337_c0_g1_i1::g.34743::m.34743	PF00005.27	1	139	3.5e-16
TRINITY_DN16337_c0_g1::TRINITY_DN16337_c0_g1_i1::g.34743::m.34743	PF00005.27	184	210	3.5e-16
TRINITY_DN16198_c0_g1::TRINITY_DN16198_c0_g1_i1::g.33874::m.33874	PF00005.27	74	235	2.7e-35
TRINITY_DN16198_c0_g1::TRINITY_DN16198_c0_g1_i1::g.33874::m.33874	PF00005.27	389	547	2.7e-35
TRINITY_DN16086_c0_g1::TRINITY_DN16086_c0_g1_i1::g.33305::m.33305	PF00005.27	5	23	4.7e-10
TRINITY_DN16086_c0_g1::TRINITY_DN16086_c0_g1_i1::g.33305::m.33305	PF00005.27	430	483	4.7e-10
TRINITY_DN16061_c0_g1::TRINITY_DN16061_c0_g1_i1::g.33504::m.33504	PF00005.27	395	536	7.9e-26
TRINITY_DN15465_c0_g1::TRINITY_DN15465_c0_g1_i1::g.31201::m.31201	PF00005.27	45	68	0.00025
TRINITY_DN15465_c0_g1::TRINITY_DN15465_c0_g1_i1::g.31201::m.31201	PF00005.27	289	326	0.00025
TRINITY_DN15465_c0_g1::TRINITY_DN15465_c0_g1_i1::g.31201::m.31201	PF00005.27	496	523	0.00025
TRINITY_DN15235_c0_g1::TRINITY_DN15235_c0_g1_i1::g.30266::m.30266	PF00005.27	35	177	5.6e-24
TRINITY_DN15191_c0_g1::TRINITY_DN15191_c0_g1_i1::g.29911::m.29911	PF00005.27	160	314	2e-13
TRINITY_DN15084_c0_g1::TRINITY_DN15084_c0_g1_i1::g.29806::m.29806	PF00005.27	585	662	5.4e-16
TRINITY_DN1471_c0_g1::TRINITY_DN1471_c0_g1_i1::g.1721::m.1721	PF00005.27	168	335	8.6e-12
TRINITY_DN14628_c0_g1::TRINITY_DN14628_c0_g1_i1::g.28099::m.28099	PF00005.27	43	151	5.3e-08
TRINITY_DN14581_c0_g1::TRINITY_DN14581_c0_g1_i1::g.27749::m.27749	PF00005.27	20	149	1.3e-24
TRINITY_DN14552_c0_g1::TRINITY_DN14552_c0_g1_i1::g.27955::m.27955	PF00005.27	9	43	7.7e-13
TRINITY_DN14552_c0_g1::TRINITY_DN14552_c0_g1_i1::g.27955::m.27955	PF00005.27	53	69	7.7e-13
TRINITY_DN14374_c0_g1::TRINITY_DN14374_c0_g1_i1::g.27038::m.27038	PF00005.27	97	246	1.7e-28
TRINITY_DN14182_c0_g1::TRINITY_DN14182_c0_g1_i1::g.26572::m.26572	PF00005.27	72	236	5.5e-22
TRINITY_DN14182_c0_g1::TRINITY_DN14182_c0_g1_i1::g.26572::m.26572	PF00005.27	275	338	5.5e-22
TRINITY_DN13314_c0_g1::TRINITY_DN13314_c0_g1_i1::g.23816::m.23816	PF00005.27	3	32	7.3e-10
TRINITY_DN13314_c0_g1::TRINITY_DN13314_c0_g1_i1::g.23816::m.23816	PF00005.27	48	65	7.3e-10
TRINITY_DN12875_c0_g1::TRINITY_DN12875_c0_g1_i1::g.22337::m.22337	PF00005.27	1	140	1e-13
TRINITY_DN12405_c0_g1::TRINITY_DN12405_c0_g1_i1::g.21252::m.21252	PF00005.27	287	439	1.2e-30
TRINITY_DN12338_c0_g1::TRINITY_DN12338_c0_g1_i1::g.20907::m.20907	PF00005.27	12	108	3.6e-09
TRINITY_DN12167_c0_g1::TRINITY_DN12167_c0_g1_i1::g.20435::m.20435	PF00005.27	395	552	6.5e-34
TRINITY_DN11544_c0_g1::TRINITY_DN11544_c0_g1_i1::g.18827::m.18827	PF00005.27	238	260	5.5e-08
TRINITY_DN11544_c0_g1::TRINITY_DN11544_c0_g1_i1::g.18827::m.18827	PF00005.27	319	359	5.5e-08
TRINITY_DN11489_c0_g1::TRINITY_DN11489_c0_g1_i1::g.18504::m.18504	PF00005.27	57	80	0.00025
TRINITY_DN1147_c0_g1::TRINITY_DN1147_c0_g1_i1::g.1419::m.1419	PF00005.27	4	35	8.4e-08
TRINITY_DN11441_c0_g1::TRINITY_DN11441_c0_g1_i1::g.18603::m.18603	PF00005.27	62	115	5e-07
TRINITY_DN11417_c0_g1::TRINITY_DN11417_c0_g1_i1::g.18564::m.18564	PF00005.27	9	128	4.6e-10
TRINITY_DN11401_c0_g1::TRINITY_DN11401_c0_g1_i1::g.18397::m.18397	PF00005.27	126	281	1.3e-22
TRINITY_DN11239_c0_g1::TRINITY_DN11239_c0_g1_i1::g.17855::m.17855	PF00005.27	160	329	2.5e-34
TRINITY_DN11163_c1_g1::TRINITY_DN11163_c1_g1_i1::g.17797::m.17797	PF00005.27	20	51	5.4e-05
TRINITY_DN10648_c0_g1::TRINITY_DN10648_c0_g1_i1::g.16486::m.16486	PF00005.27	153	308	3.2e-24
TRINITY_DN10568_c0_g1::TRINITY_DN10568_c0_g1_i1::g.16237::m.16237	PF00005.27	68	213	2.8e-19
TRINITY_DN5288_c0_g1::TRINITY_DN5288_c0_g1_i1::g.6720::m.6720	PF00006.25	21	110	9.3e-22
TRINITY_DN22192_c0_g1::TRINITY_DN22192_c0_g1_i3::g.72388::m.72388	PF00006.25	163	385	2e-62
TRINITY_DN22138_c2_g1::TRINITY_DN22138_c2_g1_i1::g.72726::m.72726	PF00006.25	31	56	0.00058
TRINITY_DN22138_c2_g1::TRINITY_DN22138_c2_g1_i1::g.72726::m.72726	PF00006.25	262	288	0.00058
TRINITY_DN22138_c2_g1::TRINITY_DN22138_c2_g1_i1::g.72726::m.72726	PF00006.25	623	646	0.00058
TRINITY_DN21639_c0_g1::TRINITY_DN21639_c0_g1_i2::g.66481::m.66481	PF00006.25	46	64	3.5e-12
TRINITY_DN21639_c0_g1::TRINITY_DN21639_c0_g1_i2::g.66481::m.66481	PF00006.25	154	361	3.5e-12
TRINITY_DN21639_c0_g1::TRINITY_DN21639_c0_g1_i1::g.66476::m.66476	PF00006.25	24	185	2.3e-09
TRINITY_DN19546_c0_g1::TRINITY_DN19546_c0_g1_i1::g.50098::m.50098	PF00006.25	233	457	7.4e-103
TRINITY_DN19439_c0_g1::TRINITY_DN19439_c0_g1_i2::g.49589::m.49589	PF00006.25	193	329	2.4e-06
TRINITY_DN19439_c0_g1::TRINITY_DN19439_c0_g1_i1::g.49584::m.49584	PF00006.25	193	329	2.9e-06
TRINITY_DN18184_c0_g1::TRINITY_DN18184_c0_g1_i1::g.42566::m.42566	PF00006.25	2	223	2.3e-72
TRINITY_DN15313_c0_g1::TRINITY_DN15313_c0_g1_i1::g.30840::m.30840	PF00006.25	211	436	1.9e-65
TRINITY_DN9743_c0_g1::TRINITY_DN9743_c0_g1_i1::g.14302::m.14302	PF00008.27	59	79	2.9e-05
TRINITY_DN9743_c0_g1::TRINITY_DN9743_c0_g1_i1::g.14302::m.14302	PF00008.27	125	147	2.9e-05
TRINITY_DN9743_c0_g1::TRINITY_DN9743_c0_g1_i1::g.14302::m.14302	PF00008.27	154	174	2.9e-05
TRINITY_DN9743_c0_g1::TRINITY_DN9743_c0_g1_i1::g.14302::m.14302	PF00008.27	209	214	2.9e-05
TRINITY_DN9743_c0_g1::TRINITY_DN9743_c0_g1_i1::g.14302::m.14302	PF00008.27	240	243	2.9e-05
TRINITY_DN9743_c0_g1::TRINITY_DN9743_c0_g1_i1::g.14302::m.14302	PF00008.27	284	307	2.9e-05
TRINITY_DN8621_c0_g1::TRINITY_DN8621_c0_g1_i1::g.12071::m.12071	PF00008.27	248	278	0.00044
TRINITY_DN8312_c0_g1::TRINITY_DN8312_c0_g1_i1::g.11649::m.11649	PF00008.27	26	50	3.3e-06
TRINITY_DN8228_c0_g1::TRINITY_DN8228_c0_g1_i1::g.11501::m.11501	PF00008.27	32	39	3.4e-05
TRINITY_DN8228_c0_g1::TRINITY_DN8228_c0_g1_i1::g.11501::m.11501	PF00008.27	43	64	3.4e-05
TRINITY_DN8228_c0_g1::TRINITY_DN8228_c0_g1_i1::g.11501::m.11501	PF00008.27	105	115	3.4e-05
TRINITY_DN8228_c0_g1::TRINITY_DN8228_c0_g1_i1::g.11501::m.11501	PF00008.27	122	135	3.4e-05
TRINITY_DN791_c0_g1::TRINITY_DN791_c0_g1_i1::g.922::m.922	PF00008.27	87	100	0.00049
TRINITY_DN791_c0_g1::TRINITY_DN791_c0_g1_i1::g.922::m.922	PF00008.27	115	139	0.00049
TRINITY_DN7677_c0_g1::TRINITY_DN7677_c0_g1_i1::g.10528::m.10528	PF00008.27	105	125	0.00016
TRINITY_DN7677_c0_g1::TRINITY_DN7677_c0_g1_i1::g.10528::m.10528	PF00008.27	145	160	0.00016
TRINITY_DN31454_c0_g1::TRINITY_DN31454_c0_g1_i1::g.83041::m.83041	PF00008.27	61	83	0.00024
TRINITY_DN31454_c0_g1::TRINITY_DN31454_c0_g1_i1::g.83041::m.83041	PF00008.27	101	114	0.00024
TRINITY_DN29210_c0_g1::TRINITY_DN29210_c0_g1_i1::g.81102::m.81102	PF00008.27	1	14	7.1e-06
TRINITY_DN29210_c0_g1::TRINITY_DN29210_c0_g1_i1::g.81102::m.81102	PF00008.27	42	65	7.1e-06
TRINITY_DN29210_c0_g1::TRINITY_DN29210_c0_g1_i1::g.81102::m.81102	PF00008.27	72	87	7.1e-06
TRINITY_DN21811_c0_g1::TRINITY_DN21811_c0_g1_i2::g.68004::m.68004	PF00008.27	19	40	5.2e-05
TRINITY_DN21811_c0_g1::TRINITY_DN21811_c0_g1_i1::g.67999::m.67999	PF00008.27	19	40	5.2e-05
TRINITY_DN20810_c0_g1::TRINITY_DN20810_c0_g1_i1::g.59380::m.59380	PF00008.27	18	45	0.00018
TRINITY_DN19862_c0_g1::TRINITY_DN19862_c0_g1_i1::g.52130::m.52130	PF00008.27	90	119	0.00089
TRINITY_DN19862_c0_g1::TRINITY_DN19862_c0_g1_i1::g.52130::m.52130	PF00008.27	194	199	0.00089
TRINITY_DN15401_c0_g1::TRINITY_DN15401_c0_g1_i1::g.30882::m.30882	PF00008.27	41	63	0.00029
TRINITY_DN9776_c0_g1::TRINITY_DN9776_c0_g1_i1::g.14470::m.14470	PF00009.27	3	106	0.00016
TRINITY_DN9290_c0_g1::TRINITY_DN9290_c0_g1_i1::g.13281::m.13281	PF00009.27	41	57	7.3e-07
TRINITY_DN9290_c0_g1::TRINITY_DN9290_c0_g1_i1::g.13281::m.13281	PF00009.27	79	199	7.3e-07
TRINITY_DN33781_c0_g1::TRINITY_DN33781_c0_g1_i1::g.85055::m.85055	PF00009.27	33	114	4.9e-33
TRINITY_DN33570_c0_g1::TRINITY_DN33570_c0_g1_i1::g.84854::m.84854	PF00009.27	1	71	1.7e-19
TRINITY_DN31872_c0_g1::TRINITY_DN31872_c0_g1_i1::g.83339::m.83339	PF00009.27	2	98	6.3e-15
TRINITY_DN31065_c0_g1::TRINITY_DN31065_c0_g1_i1::g.82610::m.82610	PF00009.27	37	66	2.3e-05
TRINITY_DN22611_c0_g1::TRINITY_DN22611_c0_g1_i1::g.74745::m.74745	PF00009.27	5	202	1.4e-54
TRINITY_DN21917_c0_g2::TRINITY_DN21917_c0_g2_i1::g.69513::m.69513	PF00009.27	5	156	5.2e-49
TRINITY_DN21773_c0_g1::TRINITY_DN21773_c0_g1_i4::g.66785::m.66785	PF00009.27	2	47	1.9e-37
TRINITY_DN21773_c0_g1::TRINITY_DN21773_c0_g1_i4::g.66785::m.66785	PF00009.27	132	268	1.9e-37
TRINITY_DN21773_c0_g1::TRINITY_DN21773_c0_g1_i3::g.66783::m.66783	PF00009.27	33	94	1.5e-34
TRINITY_DN21773_c0_g1::TRINITY_DN21773_c0_g1_i3::g.66783::m.66783	PF00009.27	176	225	1.5e-34
TRINITY_DN21773_c0_g1::TRINITY_DN21773_c0_g1_i2::g.66778::m.66778	PF00009.27	33	91	5.5e-47
TRINITY_DN21773_c0_g1::TRINITY_DN21773_c0_g1_i2::g.66778::m.66778	PF00009.27	176	312	5.5e-47
TRINITY_DN21773_c0_g1::TRINITY_DN21773_c0_g1_i1::g.66772::m.66772	PF00009.27	22	80	5.4e-47
TRINITY_DN21773_c0_g1::TRINITY_DN21773_c0_g1_i1::g.66772::m.66772	PF00009.27	165	301	5.4e-47
TRINITY_DN21769_c0_g1::TRINITY_DN21769_c0_g1_i1::g.66580::m.66580	PF00009.27	60	252	2.8e-52
TRINITY_DN21764_c0_g1::TRINITY_DN21764_c0_g1_i1::g.67386::m.67386	PF00009.27	84	278	4.6e-59
TRINITY_DN21741_c0_g1::TRINITY_DN21741_c0_g1_i1::g.66798::m.66798	PF00009.27	167	327	1.4e-30
TRINITY_DN21741_c0_g1::TRINITY_DN21741_c0_g1_i1::g.66798::m.66798	PF00009.27	527	527	1.4e-30
TRINITY_DN21724_c0_g1::TRINITY_DN21724_c0_g1_i1::g.66706::m.66706	PF00009.27	341	460	0.00082
TRINITY_DN21676_c0_g1::TRINITY_DN21676_c0_g1_i2::g.66500::m.66500	PF00009.27	67	417	2.3e-62
TRINITY_DN21676_c0_g1::TRINITY_DN21676_c0_g1_i1::g.66498::m.66498	PF00009.27	25	116	3.3e-34
TRINITY_DN21486_c0_g1::TRINITY_DN21486_c0_g1_i3::g.63825::m.63825	PF00009.27	12	28	2.5e-06
TRINITY_DN21486_c0_g1::TRINITY_DN21486_c0_g1_i3::g.63825::m.63825	PF00009.27	46	148	2.5e-06
TRINITY_DN21486_c0_g1::TRINITY_DN21486_c0_g1_i2::g.63822::m.63822	PF00009.27	12	28	2.5e-06
TRINITY_DN21486_c0_g1::TRINITY_DN21486_c0_g1_i2::g.63822::m.63822	PF00009.27	46	148	2.5e-06
TRINITY_DN21486_c0_g1::TRINITY_DN21486_c0_g1_i1::g.63818::m.63818	PF00009.27	12	28	2.5e-06
TRINITY_DN21486_c0_g1::TRINITY_DN21486_c0_g1_i1::g.63818::m.63818	PF00009.27	46	148	2.5e-06
TRINITY_DN21424_c0_g1::TRINITY_DN21424_c0_g1_i1::g.63746::m.63746	PF00009.27	78	103	4.1e-13
TRINITY_DN21424_c0_g1::TRINITY_DN21424_c0_g1_i1::g.63746::m.63746	PF00009.27	163	285	4.1e-13
TRINITY_DN21424_c0_g1::TRINITY_DN21424_c0_g1_i1::g.63746::m.63746	PF00009.27	353	374	4.1e-13
TRINITY_DN21424_c0_g1::TRINITY_DN21424_c0_g1_i1::g.63746::m.63746	PF00009.27	452	564	4.1e-13
TRINITY_DN20896_c1_g1::TRINITY_DN20896_c1_g1_i1::g.59102::m.59102	PF00009.27	173	240	9.8e-05
TRINITY_DN20896_c1_g1::TRINITY_DN20896_c1_g1_i1::g.59102::m.59102	PF00009.27	274	297	9.8e-05
TRINITY_DN20896_c1_g1::TRINITY_DN20896_c1_g1_i1::g.59102::m.59102	PF00009.27	319	330	9.8e-05
TRINITY_DN20751_c0_g1::TRINITY_DN20751_c0_g1_i6::g.58301::m.58301	PF00009.27	86	111	2e-08
TRINITY_DN20751_c0_g1::TRINITY_DN20751_c0_g1_i6::g.58301::m.58301	PF00009.27	141	213	2e-08
TRINITY_DN20751_c0_g1::TRINITY_DN20751_c0_g1_i3::g.58285::m.58285	PF00009.27	86	111	2e-08
TRINITY_DN20751_c0_g1::TRINITY_DN20751_c0_g1_i3::g.58285::m.58285	PF00009.27	141	213	2e-08
TRINITY_DN20751_c0_g1::TRINITY_DN20751_c0_g1_i2::g.58277::m.58277	PF00009.27	86	111	2e-08
TRINITY_DN20751_c0_g1::TRINITY_DN20751_c0_g1_i2::g.58277::m.58277	PF00009.27	141	213	2e-08
TRINITY_DN20751_c0_g1::TRINITY_DN20751_c0_g1_i1::g.58269::m.58269	PF00009.27	86	111	2e-08
TRINITY_DN20751_c0_g1::TRINITY_DN20751_c0_g1_i1::g.58269::m.58269	PF00009.27	141	213	2e-08
TRINITY_DN20645_c0_g1::TRINITY_DN20645_c0_g1_i1::g.57743::m.57743	PF00009.27	40	165	1.2e-05
TRINITY_DN20634_c0_g1::TRINITY_DN20634_c0_g1_i4::g.57740::m.57740	PF00009.27	14	35	0.00025
TRINITY_DN20634_c0_g1::TRINITY_DN20634_c0_g1_i4::g.57740::m.57740	PF00009.27	164	245	0.00025
TRINITY_DN20634_c0_g1::TRINITY_DN20634_c0_g1_i3::g.57737::m.57737	PF00009.27	14	35	1.1e-05
TRINITY_DN20634_c0_g1::TRINITY_DN20634_c0_g1_i3::g.57737::m.57737	PF00009.27	154	247	1.1e-05
TRINITY_DN20553_c0_g1::TRINITY_DN20553_c0_g1_i2::g.57072::m.57072	PF00009.27	3	21	3.2e-05
TRINITY_DN20553_c0_g1::TRINITY_DN20553_c0_g1_i2::g.57072::m.57072	PF00009.27	48	175	3.2e-05
TRINITY_DN20553_c0_g1::TRINITY_DN20553_c0_g1_i1::g.57069::m.57069	PF00009.27	3	21	3.2e-05
TRINITY_DN20553_c0_g1::TRINITY_DN20553_c0_g1_i1::g.57069::m.57069	PF00009.27	48	175	3.2e-05
TRINITY_DN20375_c0_g1::TRINITY_DN20375_c0_g1_i1::g.55657::m.55657	PF00009.27	199	269	1.9e-06
TRINITY_DN20375_c0_g1::TRINITY_DN20375_c0_g1_i1::g.55657::m.55657	PF00009.27	346	387	1.9e-06
TRINITY_DN20357_c0_g1::TRINITY_DN20357_c0_g1_i1::g.55314::m.55314	PF00009.27	48	62	3.3e-06
TRINITY_DN20357_c0_g1::TRINITY_DN20357_c0_g1_i1::g.55314::m.55314	PF00009.27	90	205	3.3e-06
TRINITY_DN19970_c0_g1::TRINITY_DN19970_c0_g1_i1::g.53077::m.53077	PF00009.27	261	456	3.9e-44
TRINITY_DN19711_c0_g1::TRINITY_DN19711_c0_g1_i3::g.51906::m.51906	PF00009.27	49	63	0.00021
TRINITY_DN19711_c0_g1::TRINITY_DN19711_c0_g1_i3::g.51906::m.51906	PF00009.27	96	213	0.00021
TRINITY_DN19711_c0_g1::TRINITY_DN19711_c0_g1_i2::g.51901::m.51901	PF00009.27	49	63	0.00021
TRINITY_DN19711_c0_g1::TRINITY_DN19711_c0_g1_i2::g.51901::m.51901	PF00009.27	96	213	0.00021
TRINITY_DN19665_c1_g1::TRINITY_DN19665_c1_g1_i1::g.51092::m.51092	PF00009.27	52	326	1.1e-60
TRINITY_DN19474_c0_g1::TRINITY_DN19474_c0_g1_i2::g.49533::m.49533	PF00009.27	30	252	2.5e-25
TRINITY_DN19474_c0_g1::TRINITY_DN19474_c0_g1_i1::g.49530::m.49530	PF00009.27	20	242	2.3e-25
TRINITY_DN19301_c0_g1::TRINITY_DN19301_c0_g1_i1::g.49307::m.49307	PF00009.27	74	293	4.1e-12
TRINITY_DN19265_c0_g1::TRINITY_DN19265_c0_g1_i1::g.48591::m.48591	PF00009.27	122	147	0.00023
TRINITY_DN19265_c0_g1::TRINITY_DN19265_c0_g1_i1::g.48591::m.48591	PF00009.27	231	251	0.00023
TRINITY_DN19241_c0_g1::TRINITY_DN19241_c0_g1_i1::g.48527::m.48527	PF00009.27	79	469	7.5e-58
TRINITY_DN19206_c0_g1::TRINITY_DN19206_c0_g1_i1::g.48340::m.48340	PF00009.27	135	334	6.8e-27
TRINITY_DN19004_c0_g1::TRINITY_DN19004_c0_g1_i1::g.47234::m.47234	PF00009.27	35	205	1.1e-28
TRINITY_DN18712_c0_g1::TRINITY_DN18712_c0_g1_i3::g.45808::m.45808	PF00009.27	88	105	0.00036
TRINITY_DN18712_c0_g1::TRINITY_DN18712_c0_g1_i3::g.45808::m.45808	PF00009.27	118	246	0.00036
TRINITY_DN18712_c0_g1::TRINITY_DN18712_c0_g1_i2::g.45805::m.45805	PF00009.27	88	105	0.00036
TRINITY_DN18712_c0_g1::TRINITY_DN18712_c0_g1_i2::g.45805::m.45805	PF00009.27	118	246	0.00036
TRINITY_DN18652_c0_g1::TRINITY_DN18652_c0_g1_i4::g.45508::m.45508	PF00009.27	110	236	7.9e-06
TRINITY_DN18652_c0_g1::TRINITY_DN18652_c0_g1_i1::g.45498::m.45498	PF00009.27	103	229	6.3e-06
TRINITY_DN18571_c0_g1::TRINITY_DN18571_c0_g1_i1::g.44530::m.44530	PF00009.27	63	151	1.1e-05
TRINITY_DN18458_c0_g1::TRINITY_DN18458_c0_g1_i1::g.44393::m.44393	PF00009.27	82	102	3.4e-05
TRINITY_DN18458_c0_g1::TRINITY_DN18458_c0_g1_i1::g.44393::m.44393	PF00009.27	128	238	3.4e-05
TRINITY_DN18266_c0_g1::TRINITY_DN18266_c0_g1_i1::g.43067::m.43067	PF00009.27	10	97	9.3e-05
TRINITY_DN18007_c0_g1::TRINITY_DN18007_c0_g1_i1::g.41904::m.41904	PF00009.27	18	204	5.2e-06
TRINITY_DN17843_c0_g1::TRINITY_DN17843_c0_g1_i1::g.41378::m.41378	PF00009.27	122	341	2.8e-45
TRINITY_DN17575_c0_g1::TRINITY_DN17575_c0_g1_i4::g.39991::m.39991	PF00009.27	43	216	4.8e-49
TRINITY_DN17575_c0_g1::TRINITY_DN17575_c0_g1_i3::g.39986::m.39986	PF00009.27	43	216	2e-48
TRINITY_DN17575_c0_g1::TRINITY_DN17575_c0_g1_i2::g.39980::m.39980	PF00009.27	43	216	4.8e-49
TRINITY_DN17575_c0_g1::TRINITY_DN17575_c0_g1_i1::g.39976::m.39976	PF00009.27	43	216	2e-48
TRINITY_DN17413_c0_g1::TRINITY_DN17413_c0_g1_i1::g.39225::m.39225	PF00009.27	26	235	4.9e-36
TRINITY_DN17189_c1_g1::TRINITY_DN17189_c1_g1_i1::g.38187::m.38187	PF00009.27	158	235	1.4e-08
TRINITY_DN17189_c1_g1::TRINITY_DN17189_c1_g1_i1::g.38187::m.38187	PF00009.27	265	320	1.4e-08
TRINITY_DN16983_c0_g1::TRINITY_DN16983_c0_g1_i1::g.36935::m.36935	PF00009.27	79	146	8.9e-06
TRINITY_DN16983_c0_g1::TRINITY_DN16983_c0_g1_i1::g.36935::m.36935	PF00009.27	146	241	8.9e-06
TRINITY_DN16893_c0_g1::TRINITY_DN16893_c0_g1_i1::g.36640::m.36640	PF00009.27	146	268	4.6e-05
TRINITY_DN16667_c0_g1::TRINITY_DN16667_c0_g1_i1::g.36005::m.36005	PF00009.27	49	153	3.2e-06
TRINITY_DN16468_c0_g1::TRINITY_DN16468_c0_g1_i3::g.35235::m.35235	PF00009.27	113	292	4e-06
TRINITY_DN16468_c0_g1::TRINITY_DN16468_c0_g1_i1::g.35227::m.35227	PF00009.27	115	294	4.1e-06
TRINITY_DN16326_c0_g1::TRINITY_DN16326_c0_g1_i2::g.34416::m.34416	PF00009.27	36	168	4.8e-05
TRINITY_DN16326_c0_g1::TRINITY_DN16326_c0_g1_i1::g.34415::m.34415	PF00009.27	122	252	0.00019
TRINITY_DN16023_c0_g1::TRINITY_DN16023_c0_g1_i2::g.33217::m.33217	PF00009.27	18	38	2.9e-05
TRINITY_DN16023_c0_g1::TRINITY_DN16023_c0_g1_i2::g.33217::m.33217	PF00009.27	57	173	2.9e-05
TRINITY_DN16023_c0_g1::TRINITY_DN16023_c0_g1_i1::g.33213::m.33213	PF00009.27	18	38	2.9e-05
TRINITY_DN16023_c0_g1::TRINITY_DN16023_c0_g1_i1::g.33213::m.33213	PF00009.27	57	173	2.9e-05
TRINITY_DN15903_c0_g1::TRINITY_DN15903_c0_g1_i1::g.32894::m.32894	PF00009.27	3	124	8.3e-06
TRINITY_DN15347_c0_g1::TRINITY_DN15347_c0_g1_i2::g.30645::m.30645	PF00009.27	23	47	9.8e-05
TRINITY_DN15347_c0_g1::TRINITY_DN15347_c0_g1_i2::g.30645::m.30645	PF00009.27	70	185	9.8e-05
TRINITY_DN15347_c0_g1::TRINITY_DN15347_c0_g1_i1::g.30644::m.30644	PF00009.27	42	135	0.00046
TRINITY_DN14275_c0_g1::TRINITY_DN14275_c0_g1_i1::g.26966::m.26966	PF00009.27	16	30	3e-07
TRINITY_DN14275_c0_g1::TRINITY_DN14275_c0_g1_i1::g.26966::m.26966	PF00009.27	47	177	3e-07
TRINITY_DN13827_c0_g1::TRINITY_DN13827_c0_g1_i1::g.25369::m.25369	PF00009.27	63	180	3.7e-06
TRINITY_DN13076_c0_g1::TRINITY_DN13076_c0_g1_i1::g.22955::m.22955	PF00009.27	64	309	2.1e-08
TRINITY_DN13011_c0_g1::TRINITY_DN13011_c0_g1_i1::g.23073::m.23073	PF00009.27	52	84	9.8e-06
TRINITY_DN12281_c0_g1::TRINITY_DN12281_c0_g1_i1::g.20625::m.20625	PF00009.27	8	88	0.00088
TRINITY_DN11755_c0_g1::TRINITY_DN11755_c0_g1_i1::g.19267::m.19267	PF00009.27	81	396	3.7e-44
TRINITY_DN11489_c0_g1::TRINITY_DN11489_c0_g1_i1::g.18504::m.18504	PF00009.27	57	78	1.7e-06
TRINITY_DN11489_c0_g1::TRINITY_DN11489_c0_g1_i1::g.18504::m.18504	PF00009.27	100	178	1.7e-06
TRINITY_DN10917_c0_g1::TRINITY_DN10917_c0_g1_i1::g.17116::m.17116	PF00009.27	18	52	0.00017
TRINITY_DN10917_c0_g1::TRINITY_DN10917_c0_g1_i1::g.17116::m.17116	PF00009.27	46	106	0.00017
TRINITY_DN10917_c0_g1::TRINITY_DN10917_c0_g1_i1::g.17116::m.17116	PF00009.27	203	375	0.00017
TRINITY_DN10855_c0_g1::TRINITY_DN10855_c0_g1_i1::g.16891::m.16891	PF00009.27	7	26	2.9e-06
TRINITY_DN10855_c0_g1::TRINITY_DN10855_c0_g1_i1::g.16891::m.16891	PF00009.27	143	210	2.9e-06
TRINITY_DN10089_c0_g1::TRINITY_DN10089_c0_g1_i1::g.15224::m.15224	PF00009.27	120	237	0.00056
TRINITY_DN5959_c0_g1::TRINITY_DN5959_c0_g1_i1::g.7594::m.7594	PF00010.26	15	27	0.00059
TRINITY_DN5959_c0_g1::TRINITY_DN5959_c0_g1_i1::g.7594::m.7594	PF00010.26	230	279	0.00059
TRINITY_DN22250_c0_g2::TRINITY_DN22250_c0_g2_i1::g.72993::m.72993	PF00010.26	59	106	5.3e-10
TRINITY_DN22250_c0_g2::TRINITY_DN22250_c0_g2_i1::g.72993::m.72993	PF00010.26	149	196	5.3e-10
TRINITY_DN21860_c0_g1::TRINITY_DN21860_c0_g1_i1::g.67703::m.67703	PF00010.26	421	488	7.3e-10
TRINITY_DN21858_c0_g1::TRINITY_DN21858_c0_g1_i1::g.68332::m.68332	PF00010.26	105	114	9.8e-07
TRINITY_DN21858_c0_g1::TRINITY_DN21858_c0_g1_i1::g.68332::m.68332	PF00010.26	188	235	9.8e-07
TRINITY_DN20195_c1_g1::TRINITY_DN20195_c1_g1_i1::g.54169::m.54169	PF00010.26	285	332	3.6e-07
TRINITY_DN19712_c0_g1::TRINITY_DN19712_c0_g1_i9::g.51844::m.51844	PF00010.26	178	226	1.8e-09
TRINITY_DN19712_c0_g1::TRINITY_DN19712_c0_g1_i7::g.51836::m.51836	PF00010.26	178	226	1.8e-09
TRINITY_DN19712_c0_g1::TRINITY_DN19712_c0_g1_i5::g.51830::m.51830	PF00010.26	178	226	1.8e-09
TRINITY_DN19712_c0_g1::TRINITY_DN19712_c0_g1_i4::g.51823::m.51823	PF00010.26	178	226	1.8e-09
TRINITY_DN19712_c0_g1::TRINITY_DN19712_c0_g1_i2::g.51813::m.51813	PF00010.26	178	226	1.8e-09
TRINITY_DN19712_c0_g1::TRINITY_DN19712_c0_g1_i1::g.51808::m.51808	PF00010.26	178	226	1.8e-09
TRINITY_DN14700_c0_g1::TRINITY_DN14700_c0_g1_i1::g.28419::m.28419	PF00010.26	213	263	3.6e-10
TRINITY_DN14396_c0_g1::TRINITY_DN14396_c0_g1_i1::g.27267::m.27267	PF00010.26	148	198	1.3e-11
TRINITY_DN11891_c0_g1::TRINITY_DN11891_c0_g1_i1::g.19707::m.19707	PF00010.26	154	204	1.2e-07
TRINITY_DN11891_c0_g1::TRINITY_DN11891_c0_g1_i1::g.19707::m.19707	PF00010.26	207	218	1.2e-07
TRINITY_DN17116_c0_g1::TRINITY_DN17116_c0_g1_i3::g.37735::m.37735	PF00011.21	31	131	3.3e-20
TRINITY_DN17116_c0_g1::TRINITY_DN17116_c0_g1_i2::g.37731::m.37731	PF00011.21	20	120	2.5e-20
TRINITY_DN16491_c0_g1::TRINITY_DN16491_c0_g1_i1::g.34895::m.34895	PF00011.21	82	183	1.3e-19
TRINITY_DN7561_c0_g1::TRINITY_DN7561_c0_g1_i1::g.10271::m.10271	PF00012.20	8	140	4.3e-47
TRINITY_DN7185_c0_g1::TRINITY_DN7185_c0_g1_i1::g.9634::m.9634	PF00012.20	5	126	6.4e-25
TRINITY_DN30431_c0_g1::TRINITY_DN30431_c0_g1_i1::g.81936::m.81936	PF00012.20	11	91	1.5e-17
TRINITY_DN28403_c0_g1::TRINITY_DN28403_c0_g1_i1::g.80200::m.80200	PF00012.20	1	125	4.2e-38
TRINITY_DN26698_c0_g1::TRINITY_DN26698_c0_g1_i1::g.78527::m.78527	PF00012.20	1	168	5.4e-34
TRINITY_DN26296_c0_g1::TRINITY_DN26296_c0_g1_i1::g.78088::m.78088	PF00012.20	1	176	2.3e-51
TRINITY_DN246_c0_g1::TRINITY_DN246_c0_g1_i1::g.380::m.380	PF00012.20	39	325	1.1e-58
TRINITY_DN22263_c1_g1::TRINITY_DN22263_c1_g1_i1::g.74259::m.74259	PF00012.20	1	99	1e-36
TRINITY_DN22263_c0_g4::TRINITY_DN22263_c0_g4_i2::g.74253::m.74253	PF00012.20	32	154	7.8e-49
TRINITY_DN22263_c0_g4::TRINITY_DN22263_c0_g4_i1::g.74251::m.74251	PF00012.20	9	131	3.4e-49
TRINITY_DN22263_c0_g1::TRINITY_DN22263_c0_g1_i3::g.74247::m.74247	PF00012.20	1	406	7.1e-150
TRINITY_DN22263_c0_g1::TRINITY_DN22263_c0_g1_i2::g.74241::m.74241	PF00012.20	1	406	7.1e-150
TRINITY_DN22206_c0_g1::TRINITY_DN22206_c0_g1_i6::g.73699::m.73699	PF00012.20	3	628	9.1e-116
TRINITY_DN22206_c0_g1::TRINITY_DN22206_c0_g1_i5::g.73695::m.73695	PF00012.20	37	418	2.1e-96
TRINITY_DN22206_c0_g1::TRINITY_DN22206_c0_g1_i4::g.73693::m.73693	PF00012.20	3	384	2.8e-98
TRINITY_DN22206_c0_g1::TRINITY_DN22206_c0_g1_i3::g.73688::m.73688	PF00012.20	3	689	1.8e-120
TRINITY_DN22206_c0_g1::TRINITY_DN22206_c0_g1_i3::g.73688::m.73688	PF00012.20	689	754	1.8e-120
TRINITY_DN22206_c0_g1::TRINITY_DN22206_c0_g1_i2::g.73684::m.73684	PF00012.20	38	419	9.3e-98
TRINITY_DN22206_c0_g1::TRINITY_DN22206_c0_g1_i1::g.73681::m.73681	PF00012.20	3	618	2.5e-114
TRINITY_DN21879_c0_g1::TRINITY_DN21879_c0_g1_i1::g.67621::m.67621	PF00012.20	1	171	1.7e-78
TRINITY_DN21457_c0_g1::TRINITY_DN21457_c0_g1_i3::g.63906::m.63906	PF00012.20	29	450	4.4e-81
TRINITY_DN21457_c0_g1::TRINITY_DN21457_c0_g1_i2::g.63902::m.63902	PF00012.20	33	183	1.8e-19
TRINITY_DN21457_c0_g1::TRINITY_DN21457_c0_g1_i1::g.63898::m.63898	PF00012.20	29	634	1.2e-86
TRINITY_DN21457_c0_g1::TRINITY_DN21457_c0_g1_i1::g.63898::m.63898	PF00012.20	679	768	1.2e-86
TRINITY_DN21326_c0_g1::TRINITY_DN21326_c0_g1_i1::g.63329::m.63329	PF00012.20	52	429	5.9e-51
TRINITY_DN21326_c0_g1::TRINITY_DN21326_c0_g1_i1::g.63329::m.63329	PF00012.20	466	570	5.9e-51
TRINITY_DN21326_c0_g1::TRINITY_DN21326_c0_g1_i1::g.63329::m.63329	PF00012.20	722	753	5.9e-51
TRINITY_DN2066_c0_g1::TRINITY_DN2066_c0_g1_i1::g.2554::m.2554	PF00012.20	301	382	2e-18
TRINITY_DN20481_c0_g2::TRINITY_DN20481_c0_g2_i1::g.56120::m.56120	PF00012.20	1	199	1.6e-91
TRINITY_DN20098_c0_g4::TRINITY_DN20098_c0_g4_i1::g.53429::m.53429	PF00012.20	1	89	2.9e-23
TRINITY_DN20098_c0_g1::TRINITY_DN20098_c0_g1_i2::g.53425::m.53425	PF00012.20	2	96	6e-15
TRINITY_DN19522_c0_g1::TRINITY_DN19522_c0_g1_i1::g.50053::m.50053	PF00012.20	1	216	6e-103
TRINITY_DN19429_c0_g1::TRINITY_DN19429_c0_g1_i2::g.49691::m.49691	PF00012.20	57	141	5e-37
TRINITY_DN19275_c0_g1::TRINITY_DN19275_c0_g1_i1::g.48790::m.48790	PF00012.20	76	243	7.8e-06
TRINITY_DN19275_c0_g1::TRINITY_DN19275_c0_g1_i1::g.48790::m.48790	PF00012.20	299	321	7.8e-06
TRINITY_DN18161_c0_g1::TRINITY_DN18161_c0_g1_i1::g.42770::m.42770	PF00012.20	14	176	6.5e-72
TRINITY_DN17755_c0_g1::TRINITY_DN17755_c0_g1_i1::g.40739::m.40739	PF00012.20	3	66	0.00016
TRINITY_DN13468_c0_g1::TRINITY_DN13468_c0_g1_i1::g.24198::m.24198	PF00012.20	1	116	8.6e-68
TRINITY_DN12249_c0_g3::TRINITY_DN12249_c0_g3_i1::g.20809::m.20809	PF00012.20	2	132	4.9e-46
TRINITY_DN12249_c0_g1::TRINITY_DN12249_c0_g1_i1::g.20806::m.20806	PF00012.20	1	116	4.2e-42
TRINITY_DN10481_c0_g1::TRINITY_DN10481_c0_g1_i1::g.16069::m.16069	PF00012.20	44	203	5.4e-19
TRINITY_DN4950_c0_g1::TRINITY_DN4950_c0_g1_i1::g.6109::m.6109	PF00013.29	52	124	1.4e-09
TRINITY_DN21878_c0_g1::TRINITY_DN21878_c0_g1_i1::g.68225::m.68225	PF00013.29	706	763	1.1e-05
TRINITY_DN21749_c0_g1::TRINITY_DN21749_c0_g1_i2::g.67230::m.67230	PF00013.29	191	238	1.4e-06
TRINITY_DN21749_c0_g1::TRINITY_DN21749_c0_g1_i1::g.67225::m.67225	PF00013.29	191	238	1.4e-06
TRINITY_DN21612_c0_g1::TRINITY_DN21612_c0_g1_i1::g.65779::m.65779	PF00013.29	147	193	1.7e-65
TRINITY_DN21612_c0_g1::TRINITY_DN21612_c0_g1_i1::g.65779::m.65779	PF00013.29	209	258	1.7e-65
TRINITY_DN21612_c0_g1::TRINITY_DN21612_c0_g1_i1::g.65779::m.65779	PF00013.29	276	324	1.7e-65
TRINITY_DN21612_c0_g1::TRINITY_DN21612_c0_g1_i1::g.65779::m.65779	PF00013.29	341	397	1.7e-65
TRINITY_DN21612_c0_g1::TRINITY_DN21612_c0_g1_i1::g.65779::m.65779	PF00013.29	411	463	1.7e-65
TRINITY_DN21612_c0_g1::TRINITY_DN21612_c0_g1_i1::g.65779::m.65779	PF00013.29	490	537	1.7e-65
TRINITY_DN21583_c0_g1::TRINITY_DN21583_c0_g1_i3::g.64692::m.64692	PF00013.29	44	103	3e-15
TRINITY_DN21583_c0_g1::TRINITY_DN21583_c0_g1_i1::g.64683::m.64683	PF00013.29	44	103	3e-15
TRINITY_DN21540_c0_g1::TRINITY_DN21540_c0_g1_i1::g.65163::m.65163	PF00013.29	166	225	3.3e-22
TRINITY_DN21540_c0_g1::TRINITY_DN21540_c0_g1_i1::g.65163::m.65163	PF00013.29	231	291	3.3e-22
TRINITY_DN21050_c1_g1::TRINITY_DN21050_c1_g1_i4::g.60454::m.60454	PF00013.29	246	314	3e-24
TRINITY_DN21050_c1_g1::TRINITY_DN21050_c1_g1_i4::g.60454::m.60454	PF00013.29	331	396	3e-24
TRINITY_DN21050_c1_g1::TRINITY_DN21050_c1_g1_i3::g.60449::m.60449	PF00013.29	239	307	3e-24
TRINITY_DN21050_c1_g1::TRINITY_DN21050_c1_g1_i3::g.60449::m.60449	PF00013.29	324	389	3e-24
TRINITY_DN21050_c1_g1::TRINITY_DN21050_c1_g1_i2::g.60444::m.60444	PF00013.29	246	314	3e-24
TRINITY_DN21050_c1_g1::TRINITY_DN21050_c1_g1_i2::g.60444::m.60444	PF00013.29	331	396	3e-24
TRINITY_DN21050_c1_g1::TRINITY_DN21050_c1_g1_i1::g.60439::m.60439	PF00013.29	239	307	3e-24
TRINITY_DN21050_c1_g1::TRINITY_DN21050_c1_g1_i1::g.60439::m.60439	PF00013.29	324	389	3e-24
TRINITY_DN19618_c0_g1::TRINITY_DN19618_c0_g1_i1::g.50767::m.50767	PF00013.29	591	629	1.1e-07
TRINITY_DN17298_c0_g1::TRINITY_DN17298_c0_g1_i1::g.38441::m.38441	PF00013.29	68	130	5.6e-37
TRINITY_DN17298_c0_g1::TRINITY_DN17298_c0_g1_i1::g.38441::m.38441	PF00013.29	167	229	5.6e-37
TRINITY_DN17298_c0_g1::TRINITY_DN17298_c0_g1_i1::g.38441::m.38441	PF00013.29	332	395	5.6e-37
TRINITY_DN16501_c0_g1::TRINITY_DN16501_c0_g1_i1::g.35513::m.35513	PF00013.29	34	56	4.1e-27
TRINITY_DN16501_c0_g1::TRINITY_DN16501_c0_g1_i1::g.35513::m.35513	PF00013.29	141	182	4.1e-27
TRINITY_DN16501_c0_g1::TRINITY_DN16501_c0_g1_i1::g.35513::m.35513	PF00013.29	205	263	4.1e-27
TRINITY_DN16501_c0_g1::TRINITY_DN16501_c0_g1_i1::g.35513::m.35513	PF00013.29	274	323	4.1e-27
TRINITY_DN15919_c0_g1::TRINITY_DN15919_c0_g1_i1::g.33081::m.33081	PF00013.29	263	325	1.3e-15
TRINITY_DN15654_c0_g1::TRINITY_DN15654_c0_g1_i1::g.31961::m.31961	PF00013.29	150	203	1.3e-50
TRINITY_DN15654_c0_g1::TRINITY_DN15654_c0_g1_i1::g.31961::m.31961	PF00013.29	228	277	1.3e-50
TRINITY_DN15654_c0_g1::TRINITY_DN15654_c0_g1_i1::g.31961::m.31961	PF00013.29	302	342	1.3e-50
TRINITY_DN15654_c0_g1::TRINITY_DN15654_c0_g1_i1::g.31961::m.31961	PF00013.29	363	420	1.3e-50
TRINITY_DN15654_c0_g1::TRINITY_DN15654_c0_g1_i1::g.31961::m.31961	PF00013.29	447	493	1.3e-50
TRINITY_DN15654_c0_g1::TRINITY_DN15654_c0_g1_i1::g.31961::m.31961	PF00013.29	503	557	1.3e-50
TRINITY_DN15654_c0_g1::TRINITY_DN15654_c0_g1_i1::g.31961::m.31961	PF00013.29	572	654	1.3e-50
TRINITY_DN15654_c0_g1::TRINITY_DN15654_c0_g1_i1::g.31961::m.31961	PF00013.29	684	706	1.3e-50
TRINITY_DN13990_c0_g1::TRINITY_DN13990_c0_g1_i1::g.25653::m.25653	PF00013.29	10	69	1.3e-15
TRINITY_DN12434_c0_g1::TRINITY_DN12434_c0_g1_i1::g.21308::m.21308	PF00013.29	54	114	3.9e-09
TRINITY_DN22963_c0_g1::TRINITY_DN22963_c0_g1_i1::g.75081::m.75081	PF00015.21	12	86	0.00022
TRINITY_DN14876_c0_g1::TRINITY_DN14876_c0_g1_i2::g.28971::m.28971	PF00015.21	19	44	0.00012
TRINITY_DN14876_c0_g1::TRINITY_DN14876_c0_g1_i2::g.28971::m.28971	PF00015.21	97	149	0.00012
TRINITY_DN21519_c0_g1::TRINITY_DN21519_c0_g1_i1::g.65444::m.65444	PF00017.24	46	78	1.3e-12
TRINITY_DN21519_c0_g1::TRINITY_DN21519_c0_g1_i1::g.65444::m.65444	PF00017.24	1052	1136	1.3e-12
TRINITY_DN21519_c0_g1::TRINITY_DN21519_c0_g1_i1::g.65444::m.65444	PF00017.24	1185	1229	1.3e-12
TRINITY_DN18335_c0_g1::TRINITY_DN18335_c0_g1_i1::g.43673::m.43673	PF00017.24	303	388	4.6e-17
TRINITY_DN18335_c0_g1::TRINITY_DN18335_c0_g1_i1::g.43673::m.43673	PF00017.24	415	483	4.6e-17
TRINITY_DN15615_c0_g1::TRINITY_DN15615_c0_g1_i1::g.31944::m.31944	PF00017.24	184	235	4.2e-06
TRINITY_DN13115_c0_g1::TRINITY_DN13115_c0_g1_i1::g.23196::m.23196	PF00017.24	253	310	2.7e-08
TRINITY_DN9199_c0_g1::TRINITY_DN9199_c0_g1_i1::g.12918::m.12918	PF00018.28	161	205	7.2e-12
TRINITY_DN9126_c0_g1::TRINITY_DN9126_c0_g1_i1::g.12889::m.12889	PF00018.28	183	227	4.1e-08
TRINITY_DN28178_c0_g1::TRINITY_DN28178_c0_g1_i1::g.79728::m.79728	PF00018.28	64	98	3.9e-05
TRINITY_DN26341_c0_g1::TRINITY_DN26341_c0_g1_i1::g.78178::m.78178	PF00018.28	40	86	1.1e-14
TRINITY_DN23964_c0_g1::TRINITY_DN23964_c0_g1_i1::g.75972::m.75972	PF00018.28	68	113	1.4e-11
TRINITY_DN22973_c0_g1::TRINITY_DN22973_c0_g1_i1::g.75113::m.75113	PF00018.28	9	60	2.1e-08
TRINITY_DN21954_c1_g1::TRINITY_DN21954_c1_g1_i2::g.68933::m.68933	PF00018.28	8	54	1.7e-21
TRINITY_DN21954_c1_g1::TRINITY_DN21954_c1_g1_i2::g.68933::m.68933	PF00018.28	240	285	1.7e-21
TRINITY_DN21954_c1_g1::TRINITY_DN21954_c1_g1_i1::g.68928::m.68928	PF00018.28	8	54	1.7e-21
TRINITY_DN21954_c1_g1::TRINITY_DN21954_c1_g1_i1::g.68928::m.68928	PF00018.28	240	285	1.7e-21
TRINITY_DN21807_c0_g1::TRINITY_DN21807_c0_g1_i1::g.68229::m.68229	PF00018.28	380	423	8.7e-08
TRINITY_DN21800_c1_g2::TRINITY_DN21800_c1_g2_i1::g.67527::m.67527	PF00018.28	341	378	2.6e-13
TRINITY_DN21467_c0_g1::TRINITY_DN21467_c0_g1_i1::g.64257::m.64257	PF00018.28	47	93	7.4e-10
TRINITY_DN21379_c0_g1::TRINITY_DN21379_c0_g1_i2::g.62953::m.62953	PF00018.28	353	399	2.7e-07
TRINITY_DN21379_c0_g1::TRINITY_DN21379_c0_g1_i1::g.62951::m.62951	PF00018.28	97	143	6.5e-08
TRINITY_DN21354_c0_g1::TRINITY_DN21354_c0_g1_i1::g.62918::m.62918	PF00018.28	238	282	4.3e-15
TRINITY_DN21250_c0_g1::TRINITY_DN21250_c0_g1_i1::g.62529::m.62529	PF00018.28	30	72	8.2e-05
TRINITY_DN21011_c0_g1::TRINITY_DN21011_c0_g1_i1::g.60430::m.60430	PF00018.28	312	358	6.3e-16
TRINITY_DN20755_c1_g1::TRINITY_DN20755_c1_g1_i1::g.58055::m.58055	PF00018.28	192	236	9.1e-17
TRINITY_DN20147_c0_g1::TRINITY_DN20147_c0_g1_i2::g.54489::m.54489	PF00018.28	63	109	4.5e-47
TRINITY_DN20147_c0_g1::TRINITY_DN20147_c0_g1_i2::g.54489::m.54489	PF00018.28	211	257	4.5e-47
TRINITY_DN20147_c0_g1::TRINITY_DN20147_c0_g1_i2::g.54489::m.54489	PF00018.28	298	344	4.5e-47
TRINITY_DN20147_c0_g1::TRINITY_DN20147_c0_g1_i1::g.54488::m.54488	PF00018.28	90	136	6.2e-47
TRINITY_DN20147_c0_g1::TRINITY_DN20147_c0_g1_i1::g.54488::m.54488	PF00018.28	238	284	6.2e-47
TRINITY_DN20147_c0_g1::TRINITY_DN20147_c0_g1_i1::g.54488::m.54488	PF00018.28	325	371	6.2e-47
TRINITY_DN19755_c0_g1::TRINITY_DN19755_c0_g1_i3::g.51537::m.51537	PF00018.28	5	57	2.5e-06
TRINITY_DN19555_c0_g1::TRINITY_DN19555_c0_g1_i1::g.50452::m.50452	PF00018.28	32	76	5.1e-33
TRINITY_DN19555_c0_g1::TRINITY_DN19555_c0_g1_i1::g.50452::m.50452	PF00018.28	94	141	5.1e-33
TRINITY_DN19427_c0_g1::TRINITY_DN19427_c0_g1_i3::g.49496::m.49496	PF00018.28	401	450	1.2e-08
TRINITY_DN19427_c0_g1::TRINITY_DN19427_c0_g1_i2::g.49489::m.49489	PF00018.28	615	664	1.5e-08
TRINITY_DN19427_c0_g1::TRINITY_DN19427_c0_g1_i1::g.49482::m.49482	PF00018.28	615	664	1.5e-08
TRINITY_DN19345_c0_g1::TRINITY_DN19345_c0_g1_i1::g.49319::m.49319	PF00018.28	79	124	7.7e-45
TRINITY_DN19345_c0_g1::TRINITY_DN19345_c0_g1_i1::g.49319::m.49319	PF00018.28	227	273	7.7e-45
TRINITY_DN19345_c0_g1::TRINITY_DN19345_c0_g1_i1::g.49319::m.49319	PF00018.28	355	405	7.7e-45
TRINITY_DN19151_c0_g1::TRINITY_DN19151_c0_g1_i1::g.47939::m.47939	PF00018.28	404	449	2.1e-13
TRINITY_DN19102_c0_g1::TRINITY_DN19102_c0_g1_i1::g.47847::m.47847	PF00018.28	265	309	7.3e-10
TRINITY_DN18969_c0_g1::TRINITY_DN18969_c0_g1_i2::g.46645::m.46645	PF00018.28	275	312	9.9e-06
TRINITY_DN18969_c0_g1::TRINITY_DN18969_c0_g1_i1::g.46643::m.46643	PF00018.28	275	312	9.9e-06
TRINITY_DN18116_c0_g1::TRINITY_DN18116_c0_g1_i1::g.42794::m.42794	PF00018.28	294	342	3e-26
TRINITY_DN18116_c0_g1::TRINITY_DN18116_c0_g1_i1::g.42794::m.42794	PF00018.28	404	450	3e-26
TRINITY_DN17808_c0_g1::TRINITY_DN17808_c0_g1_i2::g.41422::m.41422	PF00018.28	84	126	7.9e-12
TRINITY_DN17808_c0_g1::TRINITY_DN17808_c0_g1_i1::g.41419::m.41419	PF00018.28	68	110	6.2e-12
TRINITY_DN17741_c0_g1::TRINITY_DN17741_c0_g1_i1::g.40876::m.40876	PF00018.28	177	215	5.5e-08
TRINITY_DN17508_c0_g1::TRINITY_DN17508_c0_g1_i1::g.39707::m.39707	PF00018.28	31	77	5.6e-12
TRINITY_DN16163_c0_g1::TRINITY_DN16163_c0_g1_i1::g.33567::m.33567	PF00018.28	26	39	2.6e-11
TRINITY_DN16163_c0_g1::TRINITY_DN16163_c0_g1_i1::g.33567::m.33567	PF00018.28	99	145	2.6e-11
TRINITY_DN16122_c0_g1::TRINITY_DN16122_c0_g1_i1::g.33754::m.33754	PF00018.28	221	232	2.2e-18
TRINITY_DN16122_c0_g1::TRINITY_DN16122_c0_g1_i1::g.33754::m.33754	PF00018.28	389	434	2.2e-18
TRINITY_DN15795_c0_g1::TRINITY_DN15795_c0_g1_i1::g.32101::m.32101	PF00018.28	155	200	1.3e-14
TRINITY_DN15708_c0_g1::TRINITY_DN15708_c0_g1_i1::g.32332::m.32332	PF00018.28	2	32	0.00014
TRINITY_DN15202_c0_g1::TRINITY_DN15202_c0_g1_i1::g.30414::m.30414	PF00018.28	29	77	1.2e-10
TRINITY_DN15181_c0_g1::TRINITY_DN15181_c0_g1_i1::g.29926::m.29926	PF00018.28	53	98	2.5e-24
TRINITY_DN15181_c0_g1::TRINITY_DN15181_c0_g1_i1::g.29926::m.29926	PF00018.28	165	208	2.5e-24
TRINITY_DN14823_c0_g1::TRINITY_DN14823_c0_g1_i1::g.28958::m.28958	PF00018.28	463	476	6.5e-19
TRINITY_DN14823_c0_g1::TRINITY_DN14823_c0_g1_i1::g.28958::m.28958	PF00018.28	580	628	6.5e-19
TRINITY_DN14823_c0_g1::TRINITY_DN14823_c0_g1_i1::g.28958::m.28958	PF00018.28	736	787	6.5e-19
TRINITY_DN14451_c0_g1::TRINITY_DN14451_c0_g1_i1::g.27494::m.27494	PF00018.28	432	479	6.9e-08
TRINITY_DN13527_c0_g1::TRINITY_DN13527_c0_g1_i2::g.24490::m.24490	PF00018.28	6	55	1.7e-07
TRINITY_DN13527_c0_g1::TRINITY_DN13527_c0_g1_i2::g.24490::m.24490	PF00018.28	74	84	1.7e-07
TRINITY_DN13527_c0_g1::TRINITY_DN13527_c0_g1_i1::g.24487::m.24487	PF00018.28	6	55	1.6e-07
TRINITY_DN13527_c0_g1::TRINITY_DN13527_c0_g1_i1::g.24487::m.24487	PF00018.28	74	84	1.6e-07
TRINITY_DN10137_c0_g1::TRINITY_DN10137_c0_g1_i1::g.15324::m.15324	PF00018.28	248	294	1.2e-11
TRINITY_DN34107_c0_g1::TRINITY_DN34107_c0_g1_i1::g.85355::m.85355	PF00020.18	3	29	5e-06
TRINITY_DN34107_c0_g1::TRINITY_DN34107_c0_g1_i1::g.85355::m.85355	PF00020.18	40	61	5e-06
TRINITY_DN34107_c0_g1::TRINITY_DN34107_c0_g1_i1::g.85355::m.85355	PF00020.18	79	106	5e-06
TRINITY_DN28601_c0_g1::TRINITY_DN28601_c0_g1_i1::g.80430::m.80430	PF00020.18	14	36	2.4e-05
TRINITY_DN28601_c0_g1::TRINITY_DN28601_c0_g1_i1::g.80430::m.80430	PF00020.18	52	59	2.4e-05
TRINITY_DN28601_c0_g1::TRINITY_DN28601_c0_g1_i1::g.80430::m.80430	PF00020.18	71	88	2.4e-05
TRINITY_DN28601_c0_g1::TRINITY_DN28601_c0_g1_i1::g.80430::m.80430	PF00020.18	87	104	2.4e-05
TRINITY_DN27817_c0_g1::TRINITY_DN27817_c0_g1_i1::g.79588::m.79588	PF00020.18	4	41	4.4e-06
TRINITY_DN27817_c0_g1::TRINITY_DN27817_c0_g1_i1::g.79588::m.79588	PF00020.18	39	64	4.4e-06
TRINITY_DN27817_c0_g1::TRINITY_DN27817_c0_g1_i1::g.79588::m.79588	PF00020.18	71	90	4.4e-06
TRINITY_DN27817_c0_g1::TRINITY_DN27817_c0_g1_i1::g.79588::m.79588	PF00020.18	103	111	4.4e-06
TRINITY_DN10236_c0_g1::TRINITY_DN10236_c0_g1_i1::g.15612::m.15612	PF00020.18	11	49	4.3e-05
TRINITY_DN10236_c0_g1::TRINITY_DN10236_c0_g1_i1::g.15612::m.15612	PF00020.18	32	54	4.3e-05
TRINITY_DN10236_c0_g1::TRINITY_DN10236_c0_g1_i1::g.15612::m.15612	PF00020.18	72	87	4.3e-05
TRINITY_DN8840_c0_g1::TRINITY_DN8840_c0_g1_i1::g.12414::m.12414	PF00022.19	32	401	2.6e-47
TRINITY_DN8465_c0_g1::TRINITY_DN8465_c0_g1_i1::g.11778::m.11778	PF00022.19	4	171	2.6e-54
TRINITY_DN5194_c0_g1::TRINITY_DN5194_c0_g1_i1::g.6411::m.6411	PF00022.19	134	272	9.9e-45
TRINITY_DN30922_c0_g1::TRINITY_DN30922_c0_g1_i1::g.82520::m.82520	PF00022.19	27	69	3.1e-10
TRINITY_DN28851_c0_g1::TRINITY_DN28851_c0_g1_i1::g.80629::m.80629	PF00022.19	1	96	3.7e-36
TRINITY_DN25084_c0_g1::TRINITY_DN25084_c0_g1_i1::g.77140::m.77140	PF00022.19	52	136	4.1e-22
TRINITY_DN24509_c0_g1::TRINITY_DN24509_c0_g1_i1::g.76587::m.76587	PF00022.19	15	156	4.7e-44
TRINITY_DN22217_c0_g4::TRINITY_DN22217_c0_g4_i1::g.73065::m.73065	PF00022.19	1	131	2e-58
TRINITY_DN22217_c0_g3::TRINITY_DN22217_c0_g3_i5::g.73066::m.73066	PF00022.19	2	175	6.4e-68
TRINITY_DN22217_c0_g3::TRINITY_DN22217_c0_g3_i3::g.73058::m.73058	PF00022.19	2	176	3.5e-68
TRINITY_DN22217_c0_g3::TRINITY_DN22217_c0_g3_i2::g.73057::m.73057	PF00022.19	2	176	5.4e-69
TRINITY_DN22217_c0_g2::TRINITY_DN22217_c0_g2_i3::g.73062::m.73062	PF00022.19	100	389	1.8e-92
TRINITY_DN22217_c0_g2::TRINITY_DN22217_c0_g2_i2::g.73059::m.73059	PF00022.19	100	377	3.5e-86
TRINITY_DN22217_c0_g2::TRINITY_DN22217_c0_g2_i1::g.73054::m.73054	PF00022.19	3	102	1.4e-24
TRINITY_DN21885_c0_g3::TRINITY_DN21885_c0_g3_i2::g.67979::m.67979	PF00022.19	15	293	3.4e-48
TRINITY_DN21885_c0_g3::TRINITY_DN21885_c0_g3_i2::g.67979::m.67979	PF00022.19	346	383	3.4e-48
TRINITY_DN21658_c1_g1::TRINITY_DN21658_c1_g1_i3::g.66179::m.66179	PF00022.19	1	199	6.8e-76
TRINITY_DN21658_c1_g1::TRINITY_DN21658_c1_g1_i2::g.66177::m.66177	PF00022.19	10	165	1e-60
TRINITY_DN21658_c1_g1::TRINITY_DN21658_c1_g1_i1::g.66175::m.66175	PF00022.19	57	258	3e-76
TRINITY_DN19846_c1_g1::TRINITY_DN19846_c1_g1_i2::g.52152::m.52152	PF00022.19	2	103	3.5e-40
TRINITY_DN18868_c0_g1::TRINITY_DN18868_c0_g1_i1::g.46546::m.46546	PF00022.19	6	377	7.9e-113
TRINITY_DN18727_c0_g1::TRINITY_DN18727_c0_g1_i1::g.45780::m.45780	PF00022.19	77	297	8.7e-72
TRINITY_DN18512_c0_g2::TRINITY_DN18512_c0_g2_i1::g.44932::m.44932	PF00022.19	6	153	3.3e-42
TRINITY_DN18512_c0_g1::TRINITY_DN18512_c0_g1_i1::g.44929::m.44929	PF00022.19	2	247	5.4e-43
TRINITY_DN18424_c0_g2::TRINITY_DN18424_c0_g2_i1::g.44277::m.44277	PF00022.19	3	256	3.3e-71
TRINITY_DN18424_c0_g1::TRINITY_DN18424_c0_g1_i1::g.44274::m.44274	PF00022.19	2	136	1.9e-32
TRINITY_DN17628_c0_g1::TRINITY_DN17628_c0_g1_i2::g.40408::m.40408	PF00022.19	71	418	4.6e-85
TRINITY_DN16477_c0_g1::TRINITY_DN16477_c0_g1_i1::g.34986::m.34986	PF00022.19	68	506	2.7e-70
TRINITY_DN16237_c0_g1::TRINITY_DN16237_c0_g1_i1::g.34382::m.34382	PF00022.19	28	52	3e-11
TRINITY_DN16237_c0_g1::TRINITY_DN16237_c0_g1_i1::g.34382::m.34382	PF00022.19	83	119	3e-11
TRINITY_DN16182_c0_g1::TRINITY_DN16182_c0_g1_i1::g.33898::m.33898	PF00022.19	9	383	1.1e-89
TRINITY_DN14110_c0_g1::TRINITY_DN14110_c0_g1_i1::g.26453::m.26453	PF00022.19	5	381	9.6e-125
TRINITY_DN11431_c0_g1::TRINITY_DN11431_c0_g1_i1::g.18568::m.18568	PF00022.19	24	204	2.5e-19
TRINITY_DN9975_c0_g1::TRINITY_DN9975_c0_g1_i1::g.14874::m.14874	PF00023.30	289	309	1.2e-06
TRINITY_DN9975_c0_g1::TRINITY_DN9975_c0_g1_i1::g.14874::m.14874	PF00023.30	316	340	1.2e-06
TRINITY_DN9975_c0_g1::TRINITY_DN9975_c0_g1_i1::g.14874::m.14874	PF00023.30	342	356	1.2e-06
TRINITY_DN9775_c0_g1::TRINITY_DN9775_c0_g1_i1::g.14279::m.14279	PF00023.30	35	62	4.2e-13
TRINITY_DN9775_c0_g1::TRINITY_DN9775_c0_g1_i1::g.14279::m.14279	PF00023.30	70	96	4.2e-13
TRINITY_DN9775_c0_g1::TRINITY_DN9775_c0_g1_i1::g.14279::m.14279	PF00023.30	101	117	4.2e-13
TRINITY_DN9775_c0_g1::TRINITY_DN9775_c0_g1_i1::g.14279::m.14279	PF00023.30	131	148	4.2e-13
TRINITY_DN9775_c0_g1::TRINITY_DN9775_c0_g1_i1::g.14279::m.14279	PF00023.30	160	187	4.2e-13
TRINITY_DN9775_c0_g1::TRINITY_DN9775_c0_g1_i1::g.14279::m.14279	PF00023.30	191	218	4.2e-13
TRINITY_DN9775_c0_g1::TRINITY_DN9775_c0_g1_i1::g.14279::m.14279	PF00023.30	274	287	4.2e-13
TRINITY_DN957_c0_g1::TRINITY_DN957_c0_g1_i1::g.1179::m.1179	PF00023.30	88	144	3.1e-14
TRINITY_DN957_c0_g1::TRINITY_DN957_c0_g1_i1::g.1179::m.1179	PF00023.30	150	181	3.1e-14
TRINITY_DN957_c0_g1::TRINITY_DN957_c0_g1_i1::g.1179::m.1179	PF00023.30	187	211	3.1e-14
TRINITY_DN957_c0_g1::TRINITY_DN957_c0_g1_i1::g.1179::m.1179	PF00023.30	226	237	3.1e-14
TRINITY_DN9440_c0_g1::TRINITY_DN9440_c0_g1_i1::g.13719::m.13719	PF00023.30	72	95	2e-21
TRINITY_DN9440_c0_g1::TRINITY_DN9440_c0_g1_i1::g.13719::m.13719	PF00023.30	112	138	2e-21
TRINITY_DN9440_c0_g1::TRINITY_DN9440_c0_g1_i1::g.13719::m.13719	PF00023.30	149	170	2e-21
TRINITY_DN9440_c0_g1::TRINITY_DN9440_c0_g1_i1::g.13719::m.13719	PF00023.30	180	208	2e-21
TRINITY_DN9398_c0_g1::TRINITY_DN9398_c0_g1_i1::g.13364::m.13364	PF00023.30	16	45	6.8e-15
TRINITY_DN9398_c0_g1::TRINITY_DN9398_c0_g1_i1::g.13364::m.13364	PF00023.30	51	74	6.8e-15
TRINITY_DN9398_c0_g1::TRINITY_DN9398_c0_g1_i1::g.13364::m.13364	PF00023.30	86	111	6.8e-15
TRINITY_DN9398_c0_g1::TRINITY_DN9398_c0_g1_i1::g.13364::m.13364	PF00023.30	118	146	6.8e-15
TRINITY_DN9398_c0_g1::TRINITY_DN9398_c0_g1_i1::g.13364::m.13364	PF00023.30	149	157	6.8e-15
TRINITY_DN9352_c0_g1::TRINITY_DN9352_c0_g1_i1::g.13474::m.13474	PF00023.30	100	121	1.7e-11
TRINITY_DN9352_c0_g1::TRINITY_DN9352_c0_g1_i1::g.13474::m.13474	PF00023.30	145	162	1.7e-11
TRINITY_DN9352_c0_g1::TRINITY_DN9352_c0_g1_i1::g.13474::m.13474	PF00023.30	208	227	1.7e-11
TRINITY_DN9352_c0_g1::TRINITY_DN9352_c0_g1_i1::g.13474::m.13474	PF00023.30	244	267	1.7e-11
TRINITY_DN9352_c0_g1::TRINITY_DN9352_c0_g1_i1::g.13474::m.13474	PF00023.30	281	302	1.7e-11
TRINITY_DN9352_c0_g1::TRINITY_DN9352_c0_g1_i1::g.13474::m.13474	PF00023.30	348	372	1.7e-11
TRINITY_DN9352_c0_g1::TRINITY_DN9352_c0_g1_i1::g.13474::m.13474	PF00023.30	384	408	1.7e-11
TRINITY_DN9352_c0_g1::TRINITY_DN9352_c0_g1_i1::g.13474::m.13474	PF00023.30	419	448	1.7e-11
TRINITY_DN930_c0_g1::TRINITY_DN930_c0_g1_i1::g.1166::m.1166	PF00023.30	75	106	1.7e-10
TRINITY_DN930_c0_g1::TRINITY_DN930_c0_g1_i1::g.1166::m.1166	PF00023.30	109	136	1.7e-10
TRINITY_DN930_c0_g1::TRINITY_DN930_c0_g1_i1::g.1166::m.1166	PF00023.30	144	165	1.7e-10
TRINITY_DN9071_c0_g1::TRINITY_DN9071_c0_g1_i1::g.12809::m.12809	PF00023.30	12	34	6.8e-11
TRINITY_DN9071_c0_g1::TRINITY_DN9071_c0_g1_i1::g.12809::m.12809	PF00023.30	38	89	6.8e-11
TRINITY_DN9071_c0_g1::TRINITY_DN9071_c0_g1_i1::g.12809::m.12809	PF00023.30	111	123	6.8e-11
TRINITY_DN9071_c0_g1::TRINITY_DN9071_c0_g1_i1::g.12809::m.12809	PF00023.30	125	133	6.8e-11
TRINITY_DN8933_c0_g1::TRINITY_DN8933_c0_g1_i1::g.12593::m.12593	PF00023.30	15	42	1.8e-22
TRINITY_DN8933_c0_g1::TRINITY_DN8933_c0_g1_i1::g.12593::m.12593	PF00023.30	47	77	1.8e-22
TRINITY_DN8933_c0_g1::TRINITY_DN8933_c0_g1_i1::g.12593::m.12593	PF00023.30	82	110	1.8e-22
TRINITY_DN8933_c0_g1::TRINITY_DN8933_c0_g1_i1::g.12593::m.12593	PF00023.30	117	137	1.8e-22
TRINITY_DN8846_c0_g1::TRINITY_DN8846_c0_g1_i1::g.12356::m.12356	PF00023.30	7	32	5.6e-10
TRINITY_DN8846_c0_g1::TRINITY_DN8846_c0_g1_i1::g.12356::m.12356	PF00023.30	37	53	5.6e-10
TRINITY_DN8846_c0_g1::TRINITY_DN8846_c0_g1_i1::g.12356::m.12356	PF00023.30	124	149	5.6e-10
TRINITY_DN8846_c0_g1::TRINITY_DN8846_c0_g1_i1::g.12356::m.12356	PF00023.30	157	174	5.6e-10
TRINITY_DN8846_c0_g1::TRINITY_DN8846_c0_g1_i1::g.12356::m.12356	PF00023.30	249	269	5.6e-10
TRINITY_DN8846_c0_g1::TRINITY_DN8846_c0_g1_i1::g.12356::m.12356	PF00023.30	278	293	5.6e-10
TRINITY_DN8846_c0_g1::TRINITY_DN8846_c0_g1_i1::g.12356::m.12356	PF00023.30	307	321	5.6e-10
TRINITY_DN8686_c0_g1::TRINITY_DN8686_c0_g1_i1::g.12014::m.12014	PF00023.30	5	20	9.6e-12
TRINITY_DN8686_c0_g1::TRINITY_DN8686_c0_g1_i1::g.12014::m.12014	PF00023.30	34	52	9.6e-12
TRINITY_DN8686_c0_g1::TRINITY_DN8686_c0_g1_i1::g.12014::m.12014	PF00023.30	94	116	9.6e-12
TRINITY_DN8686_c0_g1::TRINITY_DN8686_c0_g1_i1::g.12014::m.12014	PF00023.30	125	148	9.6e-12
TRINITY_DN8686_c0_g1::TRINITY_DN8686_c0_g1_i1::g.12014::m.12014	PF00023.30	155	174	9.6e-12
TRINITY_DN8686_c0_g1::TRINITY_DN8686_c0_g1_i1::g.12014::m.12014	PF00023.30	185	212	9.6e-12
TRINITY_DN8686_c0_g1::TRINITY_DN8686_c0_g1_i1::g.12014::m.12014	PF00023.30	217	234	9.6e-12
TRINITY_DN8420_c0_g1::TRINITY_DN8420_c0_g1_i1::g.11815::m.11815	PF00023.30	4	36	9.8e-22
TRINITY_DN8420_c0_g1::TRINITY_DN8420_c0_g1_i1::g.11815::m.11815	PF00023.30	38	68	9.8e-22
TRINITY_DN8420_c0_g1::TRINITY_DN8420_c0_g1_i1::g.11815::m.11815	PF00023.30	71	98	9.8e-22
TRINITY_DN8140_c0_g1::TRINITY_DN8140_c0_g1_i1::g.11312::m.11312	PF00023.30	15	39	2.5e-26
TRINITY_DN8140_c0_g1::TRINITY_DN8140_c0_g1_i1::g.11312::m.11312	PF00023.30	48	72	2.5e-26
TRINITY_DN8140_c0_g1::TRINITY_DN8140_c0_g1_i1::g.11312::m.11312	PF00023.30	78	107	2.5e-26
TRINITY_DN8140_c0_g1::TRINITY_DN8140_c0_g1_i1::g.11312::m.11312	PF00023.30	111	137	2.5e-26
TRINITY_DN8140_c0_g1::TRINITY_DN8140_c0_g1_i1::g.11312::m.11312	PF00023.30	147	171	2.5e-26
TRINITY_DN8140_c0_g1::TRINITY_DN8140_c0_g1_i1::g.11312::m.11312	PF00023.30	182	209	2.5e-26
TRINITY_DN8140_c0_g1::TRINITY_DN8140_c0_g1_i1::g.11312::m.11312	PF00023.30	212	239	2.5e-26
TRINITY_DN8059_c0_g1::TRINITY_DN8059_c0_g1_i1::g.11070::m.11070	PF00023.30	78	107	9.2e-18
TRINITY_DN8059_c0_g1::TRINITY_DN8059_c0_g1_i1::g.11070::m.11070	PF00023.30	112	136	9.2e-18
TRINITY_DN8059_c0_g1::TRINITY_DN8059_c0_g1_i1::g.11070::m.11070	PF00023.30	150	172	9.2e-18
TRINITY_DN8059_c0_g1::TRINITY_DN8059_c0_g1_i1::g.11070::m.11070	PF00023.30	249	277	9.2e-18
TRINITY_DN8059_c0_g1::TRINITY_DN8059_c0_g1_i1::g.11070::m.11070	PF00023.30	280	308	9.2e-18
TRINITY_DN8058_c0_g1::TRINITY_DN8058_c0_g1_i1::g.11157::m.11157	PF00023.30	30	41	4.1e-07
TRINITY_DN8058_c0_g1::TRINITY_DN8058_c0_g1_i1::g.11157::m.11157	PF00023.30	62	83	4.1e-07
TRINITY_DN8058_c0_g1::TRINITY_DN8058_c0_g1_i1::g.11157::m.11157	PF00023.30	103	121	4.1e-07
TRINITY_DN8058_c0_g1::TRINITY_DN8058_c0_g1_i1::g.11157::m.11157	PF00023.30	159	173	4.1e-07
TRINITY_DN7742_c0_g1::TRINITY_DN7742_c0_g1_i1::g.10643::m.10643	PF00023.30	55	86	1.9e-21
TRINITY_DN7742_c0_g1::TRINITY_DN7742_c0_g1_i1::g.10643::m.10643	PF00023.30	87	117	1.9e-21
TRINITY_DN7742_c0_g1::TRINITY_DN7742_c0_g1_i1::g.10643::m.10643	PF00023.30	129	155	1.9e-21
TRINITY_DN7742_c0_g1::TRINITY_DN7742_c0_g1_i1::g.10643::m.10643	PF00023.30	157	161	1.9e-21
TRINITY_DN7658_c0_g1::TRINITY_DN7658_c0_g1_i1::g.10497::m.10497	PF00023.30	76	96	6.7e-15
TRINITY_DN7658_c0_g1::TRINITY_DN7658_c0_g1_i1::g.10497::m.10497	PF00023.30	120	145	6.7e-15
TRINITY_DN7658_c0_g1::TRINITY_DN7658_c0_g1_i1::g.10497::m.10497	PF00023.30	157	187	6.7e-15
TRINITY_DN7567_c0_g1::TRINITY_DN7567_c0_g1_i1::g.10287::m.10287	PF00023.30	21	51	5.4e-17
TRINITY_DN7567_c0_g1::TRINITY_DN7567_c0_g1_i1::g.10287::m.10287	PF00023.30	58	88	5.4e-17
TRINITY_DN7567_c0_g1::TRINITY_DN7567_c0_g1_i1::g.10287::m.10287	PF00023.30	92	119	5.4e-17
TRINITY_DN7567_c0_g1::TRINITY_DN7567_c0_g1_i1::g.10287::m.10287	PF00023.30	122	148	5.4e-17
TRINITY_DN7500_c0_g1::TRINITY_DN7500_c0_g1_i1::g.10313::m.10313	PF00023.30	45	63	2.1e-09
TRINITY_DN7500_c0_g1::TRINITY_DN7500_c0_g1_i1::g.10313::m.10313	PF00023.30	88	115	2.1e-09
TRINITY_DN7372_c0_g1::TRINITY_DN7372_c0_g1_i1::g.10073::m.10073	PF00023.30	62	91	6.1e-14
TRINITY_DN7372_c0_g1::TRINITY_DN7372_c0_g1_i1::g.10073::m.10073	PF00023.30	98	127	6.1e-14
TRINITY_DN7372_c0_g1::TRINITY_DN7372_c0_g1_i1::g.10073::m.10073	PF00023.30	129	141	6.1e-14
TRINITY_DN7347_c0_g1::TRINITY_DN7347_c0_g1_i1::g.10006::m.10006	PF00023.30	2	22	1.2e-21
TRINITY_DN7347_c0_g1::TRINITY_DN7347_c0_g1_i1::g.10006::m.10006	PF00023.30	35	65	1.2e-21
TRINITY_DN7347_c0_g1::TRINITY_DN7347_c0_g1_i1::g.10006::m.10006	PF00023.30	67	98	1.2e-21
TRINITY_DN7347_c0_g1::TRINITY_DN7347_c0_g1_i1::g.10006::m.10006	PF00023.30	101	128	1.2e-21
TRINITY_DN7347_c0_g1::TRINITY_DN7347_c0_g1_i1::g.10006::m.10006	PF00023.30	134	159	1.2e-21
TRINITY_DN7295_c0_g1::TRINITY_DN7295_c0_g1_i1::g.9805::m.9805	PF00023.30	1	19	1.2e-27
TRINITY_DN7295_c0_g1::TRINITY_DN7295_c0_g1_i1::g.9805::m.9805	PF00023.30	29	55	1.2e-27
TRINITY_DN7295_c0_g1::TRINITY_DN7295_c0_g1_i1::g.9805::m.9805	PF00023.30	64	85	1.2e-27
TRINITY_DN7295_c0_g1::TRINITY_DN7295_c0_g1_i1::g.9805::m.9805	PF00023.30	94	127	1.2e-27
TRINITY_DN7295_c0_g1::TRINITY_DN7295_c0_g1_i1::g.9805::m.9805	PF00023.30	129	159	1.2e-27
TRINITY_DN7295_c0_g1::TRINITY_DN7295_c0_g1_i1::g.9805::m.9805	PF00023.30	163	177	1.2e-27
TRINITY_DN7232_c0_g1::TRINITY_DN7232_c0_g1_i1::g.9902::m.9902	PF00023.30	29	35	1.3e-13
TRINITY_DN7232_c0_g1::TRINITY_DN7232_c0_g1_i1::g.9902::m.9902	PF00023.30	40	68	1.3e-13
TRINITY_DN7232_c0_g1::TRINITY_DN7232_c0_g1_i1::g.9902::m.9902	PF00023.30	78	103	1.3e-13
TRINITY_DN7232_c0_g1::TRINITY_DN7232_c0_g1_i1::g.9902::m.9902	PF00023.30	144	150	1.3e-13
TRINITY_DN7232_c0_g1::TRINITY_DN7232_c0_g1_i1::g.9902::m.9902	PF00023.30	205	227	1.3e-13
TRINITY_DN7232_c0_g1::TRINITY_DN7232_c0_g1_i1::g.9902::m.9902	PF00023.30	239	262	1.3e-13
TRINITY_DN6956_c0_g1::TRINITY_DN6956_c0_g1_i1::g.9406::m.9406	PF00023.30	6	37	3.3e-12
TRINITY_DN6956_c0_g1::TRINITY_DN6956_c0_g1_i1::g.9406::m.9406	PF00023.30	41	64	3.3e-12
TRINITY_DN6956_c0_g1::TRINITY_DN6956_c0_g1_i1::g.9406::m.9406	PF00023.30	75	85	3.3e-12
TRINITY_DN6891_c0_g1::TRINITY_DN6891_c0_g1_i1::g.9193::m.9193	PF00023.30	109	124	8.4e-05
TRINITY_DN6891_c0_g1::TRINITY_DN6891_c0_g1_i1::g.9193::m.9193	PF00023.30	170	180	8.4e-05
TRINITY_DN6891_c0_g1::TRINITY_DN6891_c0_g1_i1::g.9193::m.9193	PF00023.30	228	242	8.4e-05
TRINITY_DN6891_c0_g1::TRINITY_DN6891_c0_g1_i1::g.9193::m.9193	PF00023.30	250	276	8.4e-05
TRINITY_DN6891_c0_g1::TRINITY_DN6891_c0_g1_i1::g.9193::m.9193	PF00023.30	279	298	8.4e-05
TRINITY_DN6828_c0_g1::TRINITY_DN6828_c0_g1_i1::g.9217::m.9217	PF00023.30	88	118	2.7e-27
TRINITY_DN6828_c0_g1::TRINITY_DN6828_c0_g1_i1::g.9217::m.9217	PF00023.30	120	155	2.7e-27
TRINITY_DN6828_c0_g1::TRINITY_DN6828_c0_g1_i1::g.9217::m.9217	PF00023.30	160	182	2.7e-27
TRINITY_DN6828_c0_g1::TRINITY_DN6828_c0_g1_i1::g.9217::m.9217	PF00023.30	193	223	2.7e-27
TRINITY_DN6828_c0_g1::TRINITY_DN6828_c0_g1_i1::g.9217::m.9217	PF00023.30	228	256	2.7e-27
TRINITY_DN6828_c0_g1::TRINITY_DN6828_c0_g1_i1::g.9217::m.9217	PF00023.30	259	283	2.7e-27
TRINITY_DN6828_c0_g1::TRINITY_DN6828_c0_g1_i1::g.9217::m.9217	PF00023.30	304	325	2.7e-27
TRINITY_DN6633_c0_g1::TRINITY_DN6633_c0_g1_i1::g.8779::m.8779	PF00023.30	153	163	2.2e-11
TRINITY_DN6633_c0_g1::TRINITY_DN6633_c0_g1_i1::g.8779::m.8779	PF00023.30	173	197	2.2e-11
TRINITY_DN6633_c0_g1::TRINITY_DN6633_c0_g1_i1::g.8779::m.8779	PF00023.30	211	230	2.2e-11
TRINITY_DN6633_c0_g1::TRINITY_DN6633_c0_g1_i1::g.8779::m.8779	PF00023.30	235	258	2.2e-11
TRINITY_DN6633_c0_g1::TRINITY_DN6633_c0_g1_i1::g.8779::m.8779	PF00023.30	310	338	2.2e-11
TRINITY_DN6633_c0_g1::TRINITY_DN6633_c0_g1_i1::g.8779::m.8779	PF00023.30	342	410	2.2e-11
TRINITY_DN6611_c0_g1::TRINITY_DN6611_c0_g1_i1::g.8899::m.8899	PF00023.30	414	432	6.3e-09
TRINITY_DN6611_c0_g1::TRINITY_DN6611_c0_g1_i1::g.8899::m.8899	PF00023.30	440	468	6.3e-09
TRINITY_DN6611_c0_g1::TRINITY_DN6611_c0_g1_i1::g.8899::m.8899	PF00023.30	476	498	6.3e-09
TRINITY_DN6458_c0_g1::TRINITY_DN6458_c0_g1_i1::g.8501::m.8501	PF00023.30	9	40	1.7e-13
TRINITY_DN6458_c0_g1::TRINITY_DN6458_c0_g1_i1::g.8501::m.8501	PF00023.30	42	74	1.7e-13
TRINITY_DN6458_c0_g1::TRINITY_DN6458_c0_g1_i1::g.8501::m.8501	PF00023.30	78	105	1.7e-13
TRINITY_DN6458_c0_g1::TRINITY_DN6458_c0_g1_i1::g.8501::m.8501	PF00023.30	109	129	1.7e-13
TRINITY_DN6327_c0_g1::TRINITY_DN6327_c0_g1_i1::g.8283::m.8283	PF00023.30	162	192	5.8e-07
TRINITY_DN6327_c0_g1::TRINITY_DN6327_c0_g1_i1::g.8283::m.8283	PF00023.30	195	203	5.8e-07
TRINITY_DN5878_c0_g1::TRINITY_DN5878_c0_g1_i1::g.7414::m.7414	PF00023.30	31	56	1.3e-16
TRINITY_DN5878_c0_g1::TRINITY_DN5878_c0_g1_i1::g.7414::m.7414	PF00023.30	65	95	1.3e-16
TRINITY_DN5878_c0_g1::TRINITY_DN5878_c0_g1_i1::g.7414::m.7414	PF00023.30	98	129	1.3e-16
TRINITY_DN5850_c0_g1::TRINITY_DN5850_c0_g1_i1::g.7450::m.7450	PF00023.30	6	26	0.00012
TRINITY_DN5850_c0_g1::TRINITY_DN5850_c0_g1_i1::g.7450::m.7450	PF00023.30	37	57	0.00012
TRINITY_DN5850_c0_g1::TRINITY_DN5850_c0_g1_i1::g.7450::m.7450	PF00023.30	69	83	0.00012
TRINITY_DN5850_c0_g1::TRINITY_DN5850_c0_g1_i1::g.7450::m.7450	PF00023.30	100	116	0.00012
TRINITY_DN5850_c0_g1::TRINITY_DN5850_c0_g1_i1::g.7450::m.7450	PF00023.30	128	147	0.00012
TRINITY_DN5850_c0_g1::TRINITY_DN5850_c0_g1_i1::g.7450::m.7450	PF00023.30	189	200	0.00012
TRINITY_DN5813_c0_g1::TRINITY_DN5813_c0_g1_i1::g.7280::m.7280	PF00023.30	3	32	7.7e-06
TRINITY_DN5813_c0_g1::TRINITY_DN5813_c0_g1_i1::g.7280::m.7280	PF00023.30	43	68	7.7e-06
TRINITY_DN5754_c0_g1::TRINITY_DN5754_c0_g1_i1::g.7255::m.7255	PF00023.30	146	154	1.7e-15
TRINITY_DN5754_c0_g1::TRINITY_DN5754_c0_g1_i1::g.7255::m.7255	PF00023.30	182	205	1.7e-15
TRINITY_DN5754_c0_g1::TRINITY_DN5754_c0_g1_i1::g.7255::m.7255	PF00023.30	212	243	1.7e-15
TRINITY_DN5754_c0_g1::TRINITY_DN5754_c0_g1_i1::g.7255::m.7255	PF00023.30	246	274	1.7e-15
TRINITY_DN5754_c0_g1::TRINITY_DN5754_c0_g1_i1::g.7255::m.7255	PF00023.30	280	286	1.7e-15
TRINITY_DN5746_c0_g1::TRINITY_DN5746_c0_g1_i1::g.7223::m.7223	PF00023.30	16	37	5.5e-14
TRINITY_DN5746_c0_g1::TRINITY_DN5746_c0_g1_i1::g.7223::m.7223	PF00023.30	78	95	5.5e-14
TRINITY_DN5746_c0_g1::TRINITY_DN5746_c0_g1_i1::g.7223::m.7223	PF00023.30	106	121	5.5e-14
TRINITY_DN5746_c0_g1::TRINITY_DN5746_c0_g1_i1::g.7223::m.7223	PF00023.30	131	157	5.5e-14
TRINITY_DN5746_c0_g1::TRINITY_DN5746_c0_g1_i1::g.7223::m.7223	PF00023.30	168	188	5.5e-14
TRINITY_DN5731_c0_g1::TRINITY_DN5731_c0_g1_i1::g.7199::m.7199	PF00023.30	4	17	0.00021
TRINITY_DN5731_c0_g1::TRINITY_DN5731_c0_g1_i1::g.7199::m.7199	PF00023.30	22	45	0.00021
TRINITY_DN5680_c0_g1::TRINITY_DN5680_c0_g1_i1::g.7066::m.7066	PF00023.30	68	92	1.2e-24
TRINITY_DN5680_c0_g1::TRINITY_DN5680_c0_g1_i1::g.7066::m.7066	PF00023.30	96	127	1.2e-24
TRINITY_DN5680_c0_g1::TRINITY_DN5680_c0_g1_i1::g.7066::m.7066	PF00023.30	128	148	1.2e-24
TRINITY_DN5680_c0_g1::TRINITY_DN5680_c0_g1_i1::g.7066::m.7066	PF00023.30	161	182	1.2e-24
TRINITY_DN5680_c0_g1::TRINITY_DN5680_c0_g1_i1::g.7066::m.7066	PF00023.30	199	219	1.2e-24
TRINITY_DN5680_c0_g1::TRINITY_DN5680_c0_g1_i1::g.7066::m.7066	PF00023.30	266	311	1.2e-24
TRINITY_DN5680_c0_g1::TRINITY_DN5680_c0_g1_i1::g.7066::m.7066	PF00023.30	316	323	1.2e-24
TRINITY_DN5123_c0_g1::TRINITY_DN5123_c0_g1_i1::g.6539::m.6539	PF00023.30	30	54	3.9e-13
TRINITY_DN5123_c0_g1::TRINITY_DN5123_c0_g1_i1::g.6539::m.6539	PF00023.30	59	87	3.9e-13
TRINITY_DN5123_c0_g1::TRINITY_DN5123_c0_g1_i1::g.6539::m.6539	PF00023.30	133	155	3.9e-13
TRINITY_DN5123_c0_g1::TRINITY_DN5123_c0_g1_i1::g.6539::m.6539	PF00023.30	157	187	3.9e-13
TRINITY_DN473_c0_g1::TRINITY_DN473_c0_g1_i1::g.588::m.588	PF00023.30	76	107	5.6e-06
TRINITY_DN473_c0_g1::TRINITY_DN473_c0_g1_i1::g.588::m.588	PF00023.30	110	117	5.6e-06
TRINITY_DN4705_c0_g1::TRINITY_DN4705_c0_g1_i1::g.5891::m.5891	PF00023.30	22	48	2.7e-15
TRINITY_DN4705_c0_g1::TRINITY_DN4705_c0_g1_i1::g.5891::m.5891	PF00023.30	57	84	2.7e-15
TRINITY_DN4705_c0_g1::TRINITY_DN4705_c0_g1_i1::g.5891::m.5891	PF00023.30	88	114	2.7e-15
TRINITY_DN4705_c0_g1::TRINITY_DN4705_c0_g1_i1::g.5891::m.5891	PF00023.30	121	141	2.7e-15
TRINITY_DN4610_c0_g1::TRINITY_DN4610_c0_g1_i1::g.5842::m.5842	PF00023.30	55	75	1.4e-05
TRINITY_DN4610_c0_g1::TRINITY_DN4610_c0_g1_i1::g.5842::m.5842	PF00023.30	97	116	1.4e-05
TRINITY_DN4404_c0_g1::TRINITY_DN4404_c0_g1_i1::g.5514::m.5514	PF00023.30	7	37	1.4e-06
TRINITY_DN4404_c0_g1::TRINITY_DN4404_c0_g1_i1::g.5514::m.5514	PF00023.30	68	82	1.4e-06
TRINITY_DN4404_c0_g1::TRINITY_DN4404_c0_g1_i1::g.5514::m.5514	PF00023.30	99	115	1.4e-06
TRINITY_DN4228_c0_g1::TRINITY_DN4228_c0_g1_i1::g.5261::m.5261	PF00023.30	18	36	8.1e-05
TRINITY_DN4228_c0_g1::TRINITY_DN4228_c0_g1_i1::g.5261::m.5261	PF00023.30	44	75	8.1e-05
TRINITY_DN3847_c0_g1::TRINITY_DN3847_c0_g1_i1::g.4924::m.4924	PF00023.30	63	74	0.00025
TRINITY_DN3847_c0_g1::TRINITY_DN3847_c0_g1_i1::g.4924::m.4924	PF00023.30	77	108	0.00025
TRINITY_DN3847_c0_g1::TRINITY_DN3847_c0_g1_i1::g.4922::m.4922	PF00023.30	1	32	1.5e-08
TRINITY_DN3847_c0_g1::TRINITY_DN3847_c0_g1_i1::g.4922::m.4922	PF00023.30	36	48	1.5e-08
TRINITY_DN3812_c0_g1::TRINITY_DN3812_c0_g1_i1::g.4902::m.4902	PF00023.30	6	36	9.9e-10
TRINITY_DN3545_c0_g1::TRINITY_DN3545_c0_g1_i1::g.4416::m.4416	PF00023.30	444	478	6.2e-06
TRINITY_DN3545_c0_g1::TRINITY_DN3545_c0_g1_i1::g.4416::m.4416	PF00023.30	495	515	6.2e-06
TRINITY_DN34053_c0_g1::TRINITY_DN34053_c0_g1_i1::g.85289::m.85289	PF00023.30	21	49	8.3e-05
TRINITY_DN34053_c0_g1::TRINITY_DN34053_c0_g1_i1::g.85289::m.85289	PF00023.30	57	80	8.3e-05
TRINITY_DN34053_c0_g1::TRINITY_DN34053_c0_g1_i1::g.85289::m.85289	PF00023.30	97	105	8.3e-05
TRINITY_DN33968_c0_g1::TRINITY_DN33968_c0_g1_i1::g.85220::m.85220	PF00023.30	20	50	1.1e-19
TRINITY_DN33968_c0_g1::TRINITY_DN33968_c0_g1_i1::g.85220::m.85220	PF00023.30	56	84	1.1e-19
TRINITY_DN33968_c0_g1::TRINITY_DN33968_c0_g1_i1::g.85220::m.85220	PF00023.30	91	117	1.1e-19
TRINITY_DN33968_c0_g1::TRINITY_DN33968_c0_g1_i1::g.85220::m.85220	PF00023.30	124	133	1.1e-19
TRINITY_DN33916_c0_g1::TRINITY_DN33916_c0_g1_i1::g.85177::m.85177	PF00023.30	19	47	2.2e-10
TRINITY_DN33916_c0_g1::TRINITY_DN33916_c0_g1_i1::g.85177::m.85177	PF00023.30	47	69	2.2e-10
TRINITY_DN33916_c0_g1::TRINITY_DN33916_c0_g1_i1::g.85177::m.85177	PF00023.30	84	109	2.2e-10
TRINITY_DN33916_c0_g1::TRINITY_DN33916_c0_g1_i1::g.85177::m.85177	PF00023.30	114	140	2.2e-10
TRINITY_DN33916_c0_g1::TRINITY_DN33916_c0_g1_i1::g.85177::m.85177	PF00023.30	146	166	2.2e-10
TRINITY_DN3367_c0_g1::TRINITY_DN3367_c0_g1_i1::g.4174::m.4174	PF00023.30	69	104	5.7e-16
TRINITY_DN3367_c0_g1::TRINITY_DN3367_c0_g1_i1::g.4174::m.4174	PF00023.30	107	128	5.7e-16
TRINITY_DN3367_c0_g1::TRINITY_DN3367_c0_g1_i1::g.4174::m.4174	PF00023.30	140	160	5.7e-16
TRINITY_DN33458_c0_g1::TRINITY_DN33458_c0_g1_i1::g.84812::m.84812	PF00023.30	1	28	1e-38
TRINITY_DN33458_c0_g1::TRINITY_DN33458_c0_g1_i1::g.84812::m.84812	PF00023.30	44	61	1e-38
TRINITY_DN33458_c0_g1::TRINITY_DN33458_c0_g1_i1::g.84812::m.84812	PF00023.30	64	94	1e-38
TRINITY_DN33458_c0_g1::TRINITY_DN33458_c0_g1_i1::g.84812::m.84812	PF00023.30	98	129	1e-38
TRINITY_DN33458_c0_g1::TRINITY_DN33458_c0_g1_i1::g.84812::m.84812	PF00023.30	131	161	1e-38
TRINITY_DN33458_c0_g1::TRINITY_DN33458_c0_g1_i1::g.84812::m.84812	PF00023.30	163	186	1e-38
TRINITY_DN33458_c0_g1::TRINITY_DN33458_c0_g1_i1::g.84812::m.84812	PF00023.30	197	217	1e-38
TRINITY_DN33458_c0_g1::TRINITY_DN33458_c0_g1_i1::g.84812::m.84812	PF00023.30	232	247	1e-38
TRINITY_DN33458_c0_g1::TRINITY_DN33458_c0_g1_i1::g.84812::m.84812	PF00023.30	264	286	1e-38
TRINITY_DN33135_c0_g1::TRINITY_DN33135_c0_g1_i1::g.84486::m.84486	PF00023.30	4	10	1.4e-09
TRINITY_DN33135_c0_g1::TRINITY_DN33135_c0_g1_i1::g.84486::m.84486	PF00023.30	17	41	1.4e-09
TRINITY_DN33135_c0_g1::TRINITY_DN33135_c0_g1_i1::g.84486::m.84486	PF00023.30	48	72	1.4e-09
TRINITY_DN33135_c0_g1::TRINITY_DN33135_c0_g1_i1::g.84486::m.84486	PF00023.30	80	94	1.4e-09
TRINITY_DN32944_c0_g1::TRINITY_DN32944_c0_g1_i1::g.84279::m.84279	PF00023.30	9	29	1.1e-08
TRINITY_DN32944_c0_g1::TRINITY_DN32944_c0_g1_i1::g.84279::m.84279	PF00023.30	67	92	1.1e-08
TRINITY_DN32944_c0_g1::TRINITY_DN32944_c0_g1_i1::g.84279::m.84279	PF00023.30	99	123	1.1e-08
TRINITY_DN32944_c0_g1::TRINITY_DN32944_c0_g1_i1::g.84279::m.84279	PF00023.30	133	144	1.1e-08
TRINITY_DN32619_c0_g1::TRINITY_DN32619_c0_g1_i1::g.83849::m.83849	PF00023.30	93	119	5.1e-08
TRINITY_DN32619_c0_g1::TRINITY_DN32619_c0_g1_i1::g.83849::m.83849	PF00023.30	121	152	5.1e-08
TRINITY_DN32289_c0_g1::TRINITY_DN32289_c0_g1_i1::g.83577::m.83577	PF00023.30	12	42	1.3e-07
TRINITY_DN32289_c0_g1::TRINITY_DN32289_c0_g1_i1::g.83577::m.83577	PF00023.30	45	65	1.3e-07
TRINITY_DN3181_c0_g1::TRINITY_DN3181_c0_g1_i1::g.3798::m.3798	PF00023.30	5	20	9.6e-07
TRINITY_DN3181_c0_g1::TRINITY_DN3181_c0_g1_i1::g.3798::m.3798	PF00023.30	25	51	9.6e-07
TRINITY_DN3181_c0_g1::TRINITY_DN3181_c0_g1_i1::g.3798::m.3798	PF00023.30	59	84	9.6e-07
TRINITY_DN3181_c0_g1::TRINITY_DN3181_c0_g1_i1::g.3798::m.3798	PF00023.30	118	132	9.6e-07
TRINITY_DN31747_c0_g1::TRINITY_DN31747_c0_g1_i1::g.83302::m.83302	PF00023.30	24	31	3.1e-24
TRINITY_DN31747_c0_g1::TRINITY_DN31747_c0_g1_i1::g.83302::m.83302	PF00023.30	54	79	3.1e-24
TRINITY_DN31747_c0_g1::TRINITY_DN31747_c0_g1_i1::g.83302::m.83302	PF00023.30	100	118	3.1e-24
TRINITY_DN31747_c0_g1::TRINITY_DN31747_c0_g1_i1::g.83302::m.83302	PF00023.30	154	185	3.1e-24
TRINITY_DN31747_c0_g1::TRINITY_DN31747_c0_g1_i1::g.83302::m.83302	PF00023.30	188	217	3.1e-24
TRINITY_DN31747_c0_g1::TRINITY_DN31747_c0_g1_i1::g.83302::m.83302	PF00023.30	224	253	3.1e-24
TRINITY_DN31747_c0_g1::TRINITY_DN31747_c0_g1_i1::g.83302::m.83302	PF00023.30	256	263	3.1e-24
TRINITY_DN31564_c0_g1::TRINITY_DN31564_c0_g1_i1::g.83142::m.83142	PF00023.30	79	108	3.1e-08
TRINITY_DN31564_c0_g1::TRINITY_DN31564_c0_g1_i1::g.83142::m.83142	PF00023.30	112	136	3.1e-08
TRINITY_DN31453_c0_g1::TRINITY_DN31453_c0_g1_i1::g.83001::m.83001	PF00023.30	22	35	5.4e-11
TRINITY_DN31453_c0_g1::TRINITY_DN31453_c0_g1_i1::g.83001::m.83001	PF00023.30	43	62	5.4e-11
TRINITY_DN31453_c0_g1::TRINITY_DN31453_c0_g1_i1::g.83001::m.83001	PF00023.30	89	118	5.4e-11
TRINITY_DN31453_c0_g1::TRINITY_DN31453_c0_g1_i1::g.83001::m.83001	PF00023.30	120	130	5.4e-11
TRINITY_DN30651_c0_g1::TRINITY_DN30651_c0_g1_i1::g.82168::m.82168	PF00023.30	13	30	1.2e-18
TRINITY_DN30651_c0_g1::TRINITY_DN30651_c0_g1_i1::g.82168::m.82168	PF00023.30	33	63	1.2e-18
TRINITY_DN30651_c0_g1::TRINITY_DN30651_c0_g1_i1::g.82168::m.82168	PF00023.30	65	99	1.2e-18
TRINITY_DN30651_c0_g1::TRINITY_DN30651_c0_g1_i1::g.82168::m.82168	PF00023.30	126	131	1.2e-18
TRINITY_DN30545_c0_g1::TRINITY_DN30545_c0_g1_i1::g.82001::m.82001	PF00023.30	41	56	1.4e-07
TRINITY_DN30545_c0_g1::TRINITY_DN30545_c0_g1_i1::g.82001::m.82001	PF00023.30	72	89	1.4e-07
TRINITY_DN30545_c0_g1::TRINITY_DN30545_c0_g1_i1::g.82001::m.82001	PF00023.30	100	112	1.4e-07
TRINITY_DN30439_c0_g1::TRINITY_DN30439_c0_g1_i1::g.81928::m.81928	PF00023.30	2	30	1.4e-16
TRINITY_DN30439_c0_g1::TRINITY_DN30439_c0_g1_i1::g.81928::m.81928	PF00023.30	33	57	1.4e-16
TRINITY_DN30439_c0_g1::TRINITY_DN30439_c0_g1_i1::g.81928::m.81928	PF00023.30	71	94	1.4e-16
TRINITY_DN30439_c0_g1::TRINITY_DN30439_c0_g1_i1::g.81928::m.81928	PF00023.30	102	115	1.4e-16
TRINITY_DN30333_c0_g1::TRINITY_DN30333_c0_g1_i1::g.81805::m.81805	PF00023.30	1	31	9.7e-20
TRINITY_DN30333_c0_g1::TRINITY_DN30333_c0_g1_i1::g.81805::m.81805	PF00023.30	34	70	9.7e-20
TRINITY_DN30333_c0_g1::TRINITY_DN30333_c0_g1_i1::g.81805::m.81805	PF00023.30	73	103	9.7e-20
TRINITY_DN30333_c0_g1::TRINITY_DN30333_c0_g1_i1::g.81805::m.81805	PF00023.30	143	175	9.7e-20
TRINITY_DN30086_c0_g1::TRINITY_DN30086_c0_g1_i1::g.81594::m.81594	PF00023.30	1	12	1.4e-09
TRINITY_DN30086_c0_g1::TRINITY_DN30086_c0_g1_i1::g.81594::m.81594	PF00023.30	52	72	1.4e-09
TRINITY_DN30086_c0_g1::TRINITY_DN30086_c0_g1_i1::g.81594::m.81594	PF00023.30	84	97	1.4e-09
TRINITY_DN30003_c0_g1::TRINITY_DN30003_c0_g1_i1::g.81579::m.81579	PF00023.30	7	42	6.7e-22
TRINITY_DN30003_c0_g1::TRINITY_DN30003_c0_g1_i1::g.81579::m.81579	PF00023.30	44	70	6.7e-22
TRINITY_DN30003_c0_g1::TRINITY_DN30003_c0_g1_i1::g.81579::m.81579	PF00023.30	78	100	6.7e-22
TRINITY_DN29305_c0_g1::TRINITY_DN29305_c0_g1_i1::g.81178::m.81178	PF00023.30	24	31	0.00055
TRINITY_DN29305_c0_g1::TRINITY_DN29305_c0_g1_i1::g.81178::m.81178	PF00023.30	69	97	0.00055
TRINITY_DN29044_c0_g1::TRINITY_DN29044_c0_g1_i1::g.80835::m.80835	PF00023.30	19	50	5.2e-05
TRINITY_DN29044_c0_g1::TRINITY_DN29044_c0_g1_i1::g.80835::m.80835	PF00023.30	68	72	5.2e-05
TRINITY_DN28865_c0_g1::TRINITY_DN28865_c0_g1_i1::g.80649::m.80649	PF00023.30	71	76	9.6e-12
TRINITY_DN28865_c0_g1::TRINITY_DN28865_c0_g1_i1::g.80649::m.80649	PF00023.30	91	118	9.6e-12
TRINITY_DN28865_c0_g1::TRINITY_DN28865_c0_g1_i1::g.80649::m.80649	PF00023.30	120	150	9.6e-12
TRINITY_DN28865_c0_g1::TRINITY_DN28865_c0_g1_i1::g.80649::m.80649	PF00023.30	156	173	9.6e-12
TRINITY_DN28828_c0_g1::TRINITY_DN28828_c0_g1_i1::g.80627::m.80627	PF00023.30	80	87	1.4e-15
TRINITY_DN28828_c0_g1::TRINITY_DN28828_c0_g1_i1::g.80627::m.80627	PF00023.30	113	147	1.4e-15
TRINITY_DN28828_c0_g1::TRINITY_DN28828_c0_g1_i1::g.80627::m.80627	PF00023.30	150	180	1.4e-15
TRINITY_DN28828_c0_g1::TRINITY_DN28828_c0_g1_i1::g.80627::m.80627	PF00023.30	183	215	1.4e-15
TRINITY_DN28474_c0_g1::TRINITY_DN28474_c0_g1_i1::g.80123::m.80123	PF00023.30	2	18	1e-06
TRINITY_DN28474_c0_g1::TRINITY_DN28474_c0_g1_i1::g.80123::m.80123	PF00023.30	35	49	1e-06
TRINITY_DN28474_c0_g1::TRINITY_DN28474_c0_g1_i1::g.80123::m.80123	PF00023.30	63	81	1e-06
TRINITY_DN28474_c0_g1::TRINITY_DN28474_c0_g1_i1::g.80123::m.80123	PF00023.30	91	119	1e-06
TRINITY_DN28474_c0_g1::TRINITY_DN28474_c0_g1_i1::g.80123::m.80123	PF00023.30	126	148	1e-06
TRINITY_DN28474_c0_g1::TRINITY_DN28474_c0_g1_i1::g.80123::m.80123	PF00023.30	155	180	1e-06
TRINITY_DN28474_c0_g1::TRINITY_DN28474_c0_g1_i1::g.80123::m.80123	PF00023.30	189	202	1e-06
TRINITY_DN28418_c0_g1::TRINITY_DN28418_c0_g1_i1::g.80149::m.80149	PF00023.30	36	51	1.5e-06
TRINITY_DN28418_c0_g1::TRINITY_DN28418_c0_g1_i1::g.80149::m.80149	PF00023.30	67	91	1.5e-06
TRINITY_DN28418_c0_g1::TRINITY_DN28418_c0_g1_i1::g.80149::m.80149	PF00023.30	97	110	1.5e-06
TRINITY_DN28394_c0_g1::TRINITY_DN28394_c0_g1_i1::g.79977::m.79977	PF00023.30	10	41	9.2e-12
TRINITY_DN28394_c0_g1::TRINITY_DN28394_c0_g1_i1::g.79977::m.79977	PF00023.30	44	70	9.2e-12
TRINITY_DN28394_c0_g1::TRINITY_DN28394_c0_g1_i1::g.79977::m.79977	PF00023.30	85	148	9.2e-12
TRINITY_DN28394_c0_g1::TRINITY_DN28394_c0_g1_i1::g.79977::m.79977	PF00023.30	165	184	9.2e-12
TRINITY_DN27951_c0_g1::TRINITY_DN27951_c0_g1_i1::g.79644::m.79644	PF00023.30	68	99	0.00017
TRINITY_DN27951_c0_g1::TRINITY_DN27951_c0_g1_i1::g.79644::m.79644	PF00023.30	104	128	0.00017
TRINITY_DN27951_c0_g1::TRINITY_DN27951_c0_g1_i1::g.79644::m.79644	PF00023.30	132	143	0.00017
TRINITY_DN27473_c0_g1::TRINITY_DN27473_c0_g1_i1::g.79311::m.79311	PF00023.30	6	29	3e-05
TRINITY_DN27473_c0_g1::TRINITY_DN27473_c0_g1_i1::g.79311::m.79311	PF00023.30	72	86	3e-05
TRINITY_DN27473_c0_g1::TRINITY_DN27473_c0_g1_i1::g.79311::m.79311	PF00023.30	137	153	3e-05
TRINITY_DN2712_c0_g1::TRINITY_DN2712_c0_g1_i1::g.3285::m.3285	PF00023.30	188	207	0.00074
TRINITY_DN2712_c0_g1::TRINITY_DN2712_c0_g1_i1::g.3285::m.3285	PF00023.30	444	461	0.00074
TRINITY_DN2712_c0_g1::TRINITY_DN2712_c0_g1_i1::g.3285::m.3285	PF00023.30	481	486	0.00074
TRINITY_DN2712_c0_g1::TRINITY_DN2712_c0_g1_i1::g.3285::m.3285	PF00023.30	510	528	0.00074
TRINITY_DN27087_c0_g1::TRINITY_DN27087_c0_g1_i1::g.78969::m.78969	PF00023.30	16	43	0.00016
TRINITY_DN27087_c0_g1::TRINITY_DN27087_c0_g1_i1::g.78969::m.78969	PF00023.30	47	68	0.00016
TRINITY_DN27087_c0_g1::TRINITY_DN27087_c0_g1_i1::g.78969::m.78969	PF00023.30	90	123	0.00016
TRINITY_DN26943_c0_g1::TRINITY_DN26943_c0_g1_i1::g.78850::m.78850	PF00023.30	18	29	4.1e-05
TRINITY_DN26943_c0_g1::TRINITY_DN26943_c0_g1_i1::g.78850::m.78850	PF00023.30	58	75	4.1e-05
TRINITY_DN26943_c0_g1::TRINITY_DN26943_c0_g1_i1::g.78850::m.78850	PF00023.30	97	119	4.1e-05
TRINITY_DN26941_c0_g1::TRINITY_DN26941_c0_g1_i1::g.78848::m.78848	PF00023.30	11	44	8.4e-07
TRINITY_DN26941_c0_g1::TRINITY_DN26941_c0_g1_i1::g.78848::m.78848	PF00023.30	46	72	8.4e-07
TRINITY_DN26680_c0_g1::TRINITY_DN26680_c0_g1_i1::g.78550::m.78550	PF00023.30	17	40	2.3e-06
TRINITY_DN26680_c0_g1::TRINITY_DN26680_c0_g1_i1::g.78550::m.78550	PF00023.30	49	71	2.3e-06
TRINITY_DN26680_c0_g1::TRINITY_DN26680_c0_g1_i1::g.78550::m.78550	PF00023.30	126	139	2.3e-06
TRINITY_DN26649_c0_g1::TRINITY_DN26649_c0_g1_i1::g.78547::m.78547	PF00023.30	35	48	1.6e-19
TRINITY_DN26649_c0_g1::TRINITY_DN26649_c0_g1_i1::g.78547::m.78547	PF00023.30	67	92	1.6e-19
TRINITY_DN26649_c0_g1::TRINITY_DN26649_c0_g1_i1::g.78547::m.78547	PF00023.30	149	177	1.6e-19
TRINITY_DN26649_c0_g1::TRINITY_DN26649_c0_g1_i1::g.78547::m.78547	PF00023.30	182	210	1.6e-19
TRINITY_DN26631_c0_g1::TRINITY_DN26631_c0_g1_i1::g.78508::m.78508	PF00023.30	79	109	9.2e-08
TRINITY_DN26631_c0_g1::TRINITY_DN26631_c0_g1_i1::g.78508::m.78508	PF00023.30	112	142	9.2e-08
TRINITY_DN26618_c0_g1::TRINITY_DN26618_c0_g1_i1::g.78448::m.78448	PF00023.30	54	77	5.1e-16
TRINITY_DN26618_c0_g1::TRINITY_DN26618_c0_g1_i1::g.78448::m.78448	PF00023.30	88	116	5.1e-16
TRINITY_DN26618_c0_g1::TRINITY_DN26618_c0_g1_i1::g.78448::m.78448	PF00023.30	119	146	5.1e-16
TRINITY_DN26618_c0_g1::TRINITY_DN26618_c0_g1_i1::g.78448::m.78448	PF00023.30	151	159	5.1e-16
TRINITY_DN26440_c0_g1::TRINITY_DN26440_c0_g1_i1::g.78244::m.78244	PF00023.30	50	75	1.7e-07
TRINITY_DN26440_c0_g1::TRINITY_DN26440_c0_g1_i1::g.78244::m.78244	PF00023.30	77	106	1.7e-07
TRINITY_DN26066_c0_g1::TRINITY_DN26066_c0_g1_i1::g.77725::m.77725	PF00023.30	10	37	3.8e-15
TRINITY_DN26066_c0_g1::TRINITY_DN26066_c0_g1_i1::g.77725::m.77725	PF00023.30	49	78	3.8e-15
TRINITY_DN26066_c0_g1::TRINITY_DN26066_c0_g1_i1::g.77725::m.77725	PF00023.30	102	115	3.8e-15
TRINITY_DN26066_c0_g1::TRINITY_DN26066_c0_g1_i1::g.77725::m.77725	PF00023.30	127	148	3.8e-15
TRINITY_DN26066_c0_g1::TRINITY_DN26066_c0_g1_i1::g.77725::m.77725	PF00023.30	152	181	3.8e-15
TRINITY_DN25289_c0_g1::TRINITY_DN25289_c0_g1_i1::g.77298::m.77298	PF00023.30	2	10	4.6e-16
TRINITY_DN25289_c0_g1::TRINITY_DN25289_c0_g1_i1::g.77298::m.77298	PF00023.30	32	61	4.6e-16
TRINITY_DN25289_c0_g1::TRINITY_DN25289_c0_g1_i1::g.77298::m.77298	PF00023.30	64	96	4.6e-16
TRINITY_DN25289_c0_g1::TRINITY_DN25289_c0_g1_i1::g.77298::m.77298	PF00023.30	100	122	4.6e-16
TRINITY_DN25053_c0_g1::TRINITY_DN25053_c0_g1_i1::g.77086::m.77086	PF00023.30	1	23	3.9e-13
TRINITY_DN25053_c0_g1::TRINITY_DN25053_c0_g1_i1::g.77086::m.77086	PF00023.30	28	46	3.9e-13
TRINITY_DN25053_c0_g1::TRINITY_DN25053_c0_g1_i1::g.77086::m.77086	PF00023.30	66	96	3.9e-13
TRINITY_DN25053_c0_g1::TRINITY_DN25053_c0_g1_i1::g.77086::m.77086	PF00023.30	102	112	3.9e-13
TRINITY_DN2473_c0_g1::TRINITY_DN2473_c0_g1_i1::g.2938::m.2938	PF00023.30	7	18	1.6e-15
TRINITY_DN2473_c0_g1::TRINITY_DN2473_c0_g1_i1::g.2938::m.2938	PF00023.30	66	96	1.6e-15
TRINITY_DN2473_c0_g1::TRINITY_DN2473_c0_g1_i1::g.2938::m.2938	PF00023.30	115	122	1.6e-15
TRINITY_DN2473_c0_g1::TRINITY_DN2473_c0_g1_i1::g.2938::m.2938	PF00023.30	162	188	1.6e-15
TRINITY_DN2473_c0_g1::TRINITY_DN2473_c0_g1_i1::g.2938::m.2938	PF00023.30	195	225	1.6e-15
TRINITY_DN2473_c0_g1::TRINITY_DN2473_c0_g1_i1::g.2938::m.2938	PF00023.30	231	252	1.6e-15
TRINITY_DN24716_c0_g1::TRINITY_DN24716_c0_g1_i1::g.76781::m.76781	PF00023.30	2	24	2.8e-08
TRINITY_DN24716_c0_g1::TRINITY_DN24716_c0_g1_i1::g.76781::m.76781	PF00023.30	30	55	2.8e-08
TRINITY_DN24716_c0_g1::TRINITY_DN24716_c0_g1_i1::g.76781::m.76781	PF00023.30	57	86	2.8e-08
TRINITY_DN24716_c0_g1::TRINITY_DN24716_c0_g1_i1::g.76781::m.76781	PF00023.30	96	105	2.8e-08
TRINITY_DN24138_c0_g1::TRINITY_DN24138_c0_g1_i1::g.76146::m.76146	PF00023.30	2	10	1.9e-15
TRINITY_DN24138_c0_g1::TRINITY_DN24138_c0_g1_i1::g.76146::m.76146	PF00023.30	33	41	1.9e-15
TRINITY_DN24138_c0_g1::TRINITY_DN24138_c0_g1_i1::g.76146::m.76146	PF00023.30	48	62	1.9e-15
TRINITY_DN24138_c0_g1::TRINITY_DN24138_c0_g1_i1::g.76146::m.76146	PF00023.30	76	106	1.9e-15
TRINITY_DN24138_c0_g1::TRINITY_DN24138_c0_g1_i1::g.76146::m.76146	PF00023.30	108	139	1.9e-15
TRINITY_DN24097_c0_g1::TRINITY_DN24097_c0_g1_i1::g.76079::m.76079	PF00023.30	72	103	1.9e-13
TRINITY_DN24097_c0_g1::TRINITY_DN24097_c0_g1_i1::g.76079::m.76079	PF00023.30	107	138	1.9e-13
TRINITY_DN23987_c0_g1::TRINITY_DN23987_c0_g1_i1::g.75985::m.75985	PF00023.30	227	262	1.1e-07
TRINITY_DN23987_c0_g1::TRINITY_DN23987_c0_g1_i1::g.75985::m.75985	PF00023.30	267	286	1.1e-07
TRINITY_DN23986_c0_g1::TRINITY_DN23986_c0_g1_i1::g.75884::m.75884	PF00023.30	13	41	2.1e-19
TRINITY_DN23986_c0_g1::TRINITY_DN23986_c0_g1_i1::g.75884::m.75884	PF00023.30	50	78	2.1e-19
TRINITY_DN23986_c0_g1::TRINITY_DN23986_c0_g1_i1::g.75884::m.75884	PF00023.30	81	101	2.1e-19
TRINITY_DN23139_c0_g1::TRINITY_DN23139_c0_g1_i1::g.75342::m.75342	PF00023.30	143	163	3.8e-13
TRINITY_DN23139_c0_g1::TRINITY_DN23139_c0_g1_i1::g.75342::m.75342	PF00023.30	183	212	3.8e-13
TRINITY_DN23139_c0_g1::TRINITY_DN23139_c0_g1_i1::g.75342::m.75342	PF00023.30	214	235	3.8e-13
TRINITY_DN23139_c0_g1::TRINITY_DN23139_c0_g1_i1::g.75342::m.75342	PF00023.30	248	256	3.8e-13
TRINITY_DN22967_c0_g1::TRINITY_DN22967_c0_g1_i1::g.75126::m.75126	PF00023.30	67	97	2.8e-19
TRINITY_DN22967_c0_g1::TRINITY_DN22967_c0_g1_i1::g.75126::m.75126	PF00023.30	100	135	2.8e-19
TRINITY_DN22967_c0_g1::TRINITY_DN22967_c0_g1_i1::g.75126::m.75126	PF00023.30	142	168	2.8e-19
TRINITY_DN22938_c0_g1::TRINITY_DN22938_c0_g1_i1::g.75109::m.75109	PF00023.30	3	33	8.3e-18
TRINITY_DN22938_c0_g1::TRINITY_DN22938_c0_g1_i1::g.75109::m.75109	PF00023.30	36	63	8.3e-18
TRINITY_DN22938_c0_g1::TRINITY_DN22938_c0_g1_i1::g.75109::m.75109	PF00023.30	66	92	8.3e-18
TRINITY_DN22938_c0_g1::TRINITY_DN22938_c0_g1_i1::g.75109::m.75109	PF00023.30	104	115	8.3e-18
TRINITY_DN22409_c0_g1::TRINITY_DN22409_c0_g1_i1::g.74487::m.74487	PF00023.30	26	49	0.00039
TRINITY_DN22409_c0_g1::TRINITY_DN22409_c0_g1_i1::g.74487::m.74487	PF00023.30	55	74	0.00039
TRINITY_DN22409_c0_g1::TRINITY_DN22409_c0_g1_i1::g.74487::m.74487	PF00023.30	133	144	0.00039
TRINITY_DN22409_c0_g1::TRINITY_DN22409_c0_g1_i1::g.74485::m.74485	PF00023.30	60	76	2e-19
TRINITY_DN22409_c0_g1::TRINITY_DN22409_c0_g1_i1::g.74485::m.74485	PF00023.30	95	121	2e-19
TRINITY_DN22409_c0_g1::TRINITY_DN22409_c0_g1_i1::g.74485::m.74485	PF00023.30	127	153	2e-19
TRINITY_DN22409_c0_g1::TRINITY_DN22409_c0_g1_i1::g.74485::m.74485	PF00023.30	157	187	2e-19
TRINITY_DN22409_c0_g1::TRINITY_DN22409_c0_g1_i1::g.74485::m.74485	PF00023.30	200	216	2e-19
TRINITY_DN22409_c0_g1::TRINITY_DN22409_c0_g1_i1::g.74485::m.74485	PF00023.30	223	239	2e-19
TRINITY_DN22409_c0_g1::TRINITY_DN22409_c0_g1_i1::g.74485::m.74485	PF00023.30	258	284	2e-19
TRINITY_DN22409_c0_g1::TRINITY_DN22409_c0_g1_i1::g.74485::m.74485	PF00023.30	302	326	2e-19
TRINITY_DN22409_c0_g1::TRINITY_DN22409_c0_g1_i1::g.74485::m.74485	PF00023.30	336	363	2e-19
TRINITY_DN22216_c0_g1::TRINITY_DN22216_c0_g1_i2::g.74045::m.74045	PF00023.30	2	16	0.00021
TRINITY_DN22216_c0_g1::TRINITY_DN22216_c0_g1_i2::g.74045::m.74045	PF00023.30	21	25	0.00021
TRINITY_DN22216_c0_g1::TRINITY_DN22216_c0_g1_i2::g.74045::m.74045	PF00023.30	69	101	0.00021
TRINITY_DN22216_c0_g1::TRINITY_DN22216_c0_g1_i2::g.74045::m.74045	PF00023.30	102	127	0.00021
TRINITY_DN22216_c0_g1::TRINITY_DN22216_c0_g1_i1::g.74036::m.74036	PF00023.30	36	63	2.9e-39
TRINITY_DN22216_c0_g1::TRINITY_DN22216_c0_g1_i1::g.74036::m.74036	PF00023.30	69	99	2.9e-39
TRINITY_DN22216_c0_g1::TRINITY_DN22216_c0_g1_i1::g.74036::m.74036	PF00023.30	108	134	2.9e-39
TRINITY_DN22216_c0_g1::TRINITY_DN22216_c0_g1_i1::g.74036::m.74036	PF00023.30	139	169	2.9e-39
TRINITY_DN22216_c0_g1::TRINITY_DN22216_c0_g1_i1::g.74036::m.74036	PF00023.30	173	199	2.9e-39
TRINITY_DN22216_c0_g1::TRINITY_DN22216_c0_g1_i1::g.74036::m.74036	PF00023.30	209	248	2.9e-39
TRINITY_DN22216_c0_g1::TRINITY_DN22216_c0_g1_i1::g.74036::m.74036	PF00023.30	301	333	2.9e-39
TRINITY_DN22216_c0_g1::TRINITY_DN22216_c0_g1_i1::g.74036::m.74036	PF00023.30	334	360	2.9e-39
TRINITY_DN22216_c0_g1::TRINITY_DN22216_c0_g1_i1::g.74036::m.74036	PF00023.30	451	488	2.9e-39
TRINITY_DN22216_c0_g1::TRINITY_DN22216_c0_g1_i1::g.74036::m.74036	PF00023.30	491	511	2.9e-39
TRINITY_DN22216_c0_g1::TRINITY_DN22216_c0_g1_i1::g.74036::m.74036	PF00023.30	525	548	2.9e-39
TRINITY_DN22216_c0_g1::TRINITY_DN22216_c0_g1_i1::g.74036::m.74036	PF00023.30	788	816	2.9e-39
TRINITY_DN22216_c0_g1::TRINITY_DN22216_c0_g1_i1::g.74036::m.74036	PF00023.30	830	846	2.9e-39
TRINITY_DN22216_c0_g1::TRINITY_DN22216_c0_g1_i1::g.74036::m.74036	PF00023.30	859	883	2.9e-39
TRINITY_DN22216_c0_g1::TRINITY_DN22216_c0_g1_i1::g.74036::m.74036	PF00023.30	893	912	2.9e-39
TRINITY_DN22070_c0_g1::TRINITY_DN22070_c0_g1_i1::g.70632::m.70632	PF00023.30	53	78	2.1e-30
TRINITY_DN22070_c0_g1::TRINITY_DN22070_c0_g1_i1::g.70632::m.70632	PF00023.30	81	111	2.1e-30
TRINITY_DN22070_c0_g1::TRINITY_DN22070_c0_g1_i1::g.70632::m.70632	PF00023.30	117	137	2.1e-30
TRINITY_DN22070_c0_g1::TRINITY_DN22070_c0_g1_i1::g.70632::m.70632	PF00023.30	152	181	2.1e-30
TRINITY_DN22070_c0_g1::TRINITY_DN22070_c0_g1_i1::g.70632::m.70632	PF00023.30	187	202	2.1e-30
TRINITY_DN22070_c0_g1::TRINITY_DN22070_c0_g1_i1::g.70632::m.70632	PF00023.30	226	256	2.1e-30
TRINITY_DN22070_c0_g1::TRINITY_DN22070_c0_g1_i1::g.70632::m.70632	PF00023.30	260	297	2.1e-30
TRINITY_DN22047_c0_g1::TRINITY_DN22047_c0_g1_i1::g.70528::m.70528	PF00023.30	46	67	0.00038
TRINITY_DN22047_c0_g1::TRINITY_DN22047_c0_g1_i1::g.70528::m.70528	PF00023.30	150	168	0.00038
TRINITY_DN22047_c0_g1::TRINITY_DN22047_c0_g1_i1::g.70528::m.70528	PF00023.30	317	333	0.00038
TRINITY_DN22047_c0_g1::TRINITY_DN22047_c0_g1_i1::g.70528::m.70528	PF00023.30	607	632	0.00038
TRINITY_DN22047_c0_g1::TRINITY_DN22047_c0_g1_i1::g.70528::m.70528	PF00023.30	787	809	0.00038
TRINITY_DN22047_c0_g1::TRINITY_DN22047_c0_g1_i1::g.70528::m.70528	PF00023.30	834	851	0.00038
TRINITY_DN22030_c1_g1::TRINITY_DN22030_c1_g1_i1::g.70446::m.70446	PF00023.30	260	286	1.1e-17
TRINITY_DN22030_c1_g1::TRINITY_DN22030_c1_g1_i1::g.70446::m.70446	PF00023.30	289	318	1.1e-17
TRINITY_DN22030_c1_g1::TRINITY_DN22030_c1_g1_i1::g.70446::m.70446	PF00023.30	322	353	1.1e-17
TRINITY_DN22030_c1_g1::TRINITY_DN22030_c1_g1_i1::g.70446::m.70446	PF00023.30	354	385	1.1e-17
TRINITY_DN22030_c1_g1::TRINITY_DN22030_c1_g1_i1::g.70446::m.70446	PF00023.30	391	411	1.1e-17
TRINITY_DN21982_c0_g1::TRINITY_DN21982_c0_g1_i1::g.69660::m.69660	PF00023.30	167	183	1.2e-15
TRINITY_DN21982_c0_g1::TRINITY_DN21982_c0_g1_i1::g.69660::m.69660	PF00023.30	198	227	1.2e-15
TRINITY_DN21982_c0_g1::TRINITY_DN21982_c0_g1_i1::g.69660::m.69660	PF00023.30	232	256	1.2e-15
TRINITY_DN21982_c0_g1::TRINITY_DN21982_c0_g1_i1::g.69660::m.69660	PF00023.30	263	282	1.2e-15
TRINITY_DN21982_c0_g1::TRINITY_DN21982_c0_g1_i1::g.69660::m.69660	PF00023.30	296	326	1.2e-15
TRINITY_DN21982_c0_g1::TRINITY_DN21982_c0_g1_i1::g.69660::m.69660	PF00023.30	329	361	1.2e-15
TRINITY_DN21982_c0_g1::TRINITY_DN21982_c0_g1_i1::g.69660::m.69660	PF00023.30	363	376	1.2e-15
TRINITY_DN21931_c0_g1::TRINITY_DN21931_c0_g1_i2::g.69617::m.69617	PF00023.30	68	86	0.00016
TRINITY_DN21931_c0_g1::TRINITY_DN21931_c0_g1_i2::g.69617::m.69617	PF00023.30	133	159	0.00016
TRINITY_DN21931_c0_g1::TRINITY_DN21931_c0_g1_i2::g.69617::m.69617	PF00023.30	217	232	0.00016
TRINITY_DN21931_c0_g1::TRINITY_DN21931_c0_g1_i2::g.69617::m.69617	PF00023.30	242	256	0.00016
TRINITY_DN21931_c0_g1::TRINITY_DN21931_c0_g1_i2::g.69617::m.69617	PF00023.30	283	316	0.00016
TRINITY_DN21931_c0_g1::TRINITY_DN21931_c0_g1_i2::g.69617::m.69617	PF00023.30	319	339	0.00016
TRINITY_DN21931_c0_g1::TRINITY_DN21931_c0_g1_i2::g.69617::m.69617	PF00023.30	352	392	0.00016
TRINITY_DN21876_c0_g1::TRINITY_DN21876_c0_g1_i4::g.67955::m.67955	PF00023.30	9	27	5.5e-17
TRINITY_DN21876_c0_g1::TRINITY_DN21876_c0_g1_i4::g.67955::m.67955	PF00023.30	34	64	5.5e-17
TRINITY_DN21876_c0_g1::TRINITY_DN21876_c0_g1_i4::g.67955::m.67955	PF00023.30	69	96	5.5e-17
TRINITY_DN21876_c0_g1::TRINITY_DN21876_c0_g1_i4::g.67955::m.67955	PF00023.30	103	115	5.5e-17
TRINITY_DN21876_c0_g1::TRINITY_DN21876_c0_g1_i3::g.67947::m.67947	PF00023.30	9	27	5.5e-17
TRINITY_DN21876_c0_g1::TRINITY_DN21876_c0_g1_i3::g.67947::m.67947	PF00023.30	34	64	5.5e-17
TRINITY_DN21876_c0_g1::TRINITY_DN21876_c0_g1_i3::g.67947::m.67947	PF00023.30	69	96	5.5e-17
TRINITY_DN21876_c0_g1::TRINITY_DN21876_c0_g1_i3::g.67947::m.67947	PF00023.30	103	115	5.5e-17
TRINITY_DN21761_c0_g1::TRINITY_DN21761_c0_g1_i3::g.67190::m.67190	PF00023.30	15	39	4.9e-20
TRINITY_DN21761_c0_g1::TRINITY_DN21761_c0_g1_i3::g.67190::m.67190	PF00023.30	44	72	4.9e-20
TRINITY_DN21761_c0_g1::TRINITY_DN21761_c0_g1_i3::g.67190::m.67190	PF00023.30	75	106	4.9e-20
TRINITY_DN21761_c0_g1::TRINITY_DN21761_c0_g1_i3::g.67190::m.67190	PF00023.30	108	138	4.9e-20
TRINITY_DN21761_c0_g1::TRINITY_DN21761_c0_g1_i3::g.67190::m.67190	PF00023.30	141	163	4.9e-20
TRINITY_DN21761_c0_g1::TRINITY_DN21761_c0_g1_i1::g.67186::m.67186	PF00023.30	9	33	4.7e-20
TRINITY_DN21761_c0_g1::TRINITY_DN21761_c0_g1_i1::g.67186::m.67186	PF00023.30	38	66	4.7e-20
TRINITY_DN21761_c0_g1::TRINITY_DN21761_c0_g1_i1::g.67186::m.67186	PF00023.30	69	100	4.7e-20
TRINITY_DN21761_c0_g1::TRINITY_DN21761_c0_g1_i1::g.67186::m.67186	PF00023.30	102	132	4.7e-20
TRINITY_DN21761_c0_g1::TRINITY_DN21761_c0_g1_i1::g.67186::m.67186	PF00023.30	135	157	4.7e-20
TRINITY_DN21753_c0_g1::TRINITY_DN21753_c0_g1_i1::g.67143::m.67143	PF00023.30	180	191	1.9e-05
TRINITY_DN21753_c0_g1::TRINITY_DN21753_c0_g1_i1::g.67143::m.67143	PF00023.30	353	381	1.9e-05
TRINITY_DN21753_c0_g1::TRINITY_DN21753_c0_g1_i1::g.67143::m.67143	PF00023.30	387	412	1.9e-05
TRINITY_DN21753_c0_g1::TRINITY_DN21753_c0_g1_i1::g.67143::m.67143	PF00023.30	422	436	1.9e-05
TRINITY_DN21702_c0_g1::TRINITY_DN21702_c0_g1_i2::g.66890::m.66890	PF00023.30	11	20	6.6e-15
TRINITY_DN21702_c0_g1::TRINITY_DN21702_c0_g1_i2::g.66890::m.66890	PF00023.30	26	56	6.6e-15
TRINITY_DN21702_c0_g1::TRINITY_DN21702_c0_g1_i2::g.66890::m.66890	PF00023.30	59	89	6.6e-15
TRINITY_DN21702_c0_g1::TRINITY_DN21702_c0_g1_i2::g.66890::m.66890	PF00023.30	92	101	6.6e-15
TRINITY_DN21702_c0_g1::TRINITY_DN21702_c0_g1_i1::g.66887::m.66887	PF00023.30	67	94	4.7e-68
TRINITY_DN21702_c0_g1::TRINITY_DN21702_c0_g1_i1::g.66887::m.66887	PF00023.30	99	127	4.7e-68
TRINITY_DN21702_c0_g1::TRINITY_DN21702_c0_g1_i1::g.66887::m.66887	PF00023.30	132	160	4.7e-68
TRINITY_DN21702_c0_g1::TRINITY_DN21702_c0_g1_i1::g.66887::m.66887	PF00023.30	165	195	4.7e-68
TRINITY_DN21702_c0_g1::TRINITY_DN21702_c0_g1_i1::g.66887::m.66887	PF00023.30	199	224	4.7e-68
TRINITY_DN21702_c0_g1::TRINITY_DN21702_c0_g1_i1::g.66887::m.66887	PF00023.30	233	251	4.7e-68
TRINITY_DN21702_c0_g1::TRINITY_DN21702_c0_g1_i1::g.66887::m.66887	PF00023.30	470	497	4.7e-68
TRINITY_DN21702_c0_g1::TRINITY_DN21702_c0_g1_i1::g.66887::m.66887	PF00023.30	501	530	4.7e-68
TRINITY_DN21702_c0_g1::TRINITY_DN21702_c0_g1_i1::g.66887::m.66887	PF00023.30	534	565	4.7e-68
TRINITY_DN21702_c0_g1::TRINITY_DN21702_c0_g1_i1::g.66887::m.66887	PF00023.30	567	590	4.7e-68
TRINITY_DN21702_c0_g1::TRINITY_DN21702_c0_g1_i1::g.66887::m.66887	PF00023.30	602	625	4.7e-68
TRINITY_DN21702_c0_g1::TRINITY_DN21702_c0_g1_i1::g.66887::m.66887	PF00023.30	630	658	4.7e-68
TRINITY_DN21702_c0_g1::TRINITY_DN21702_c0_g1_i1::g.66887::m.66887	PF00023.30	666	691	4.7e-68
TRINITY_DN21702_c0_g1::TRINITY_DN21702_c0_g1_i1::g.66887::m.66887	PF00023.30	697	727	4.7e-68
TRINITY_DN21702_c0_g1::TRINITY_DN21702_c0_g1_i1::g.66887::m.66887	PF00023.30	730	760	4.7e-68
TRINITY_DN21702_c0_g1::TRINITY_DN21702_c0_g1_i1::g.66887::m.66887	PF00023.30	763	788	4.7e-68
TRINITY_DN21702_c0_g1::TRINITY_DN21702_c0_g1_i1::g.66887::m.66887	PF00023.30	797	821	4.7e-68
TRINITY_DN21619_c0_g1::TRINITY_DN21619_c0_g1_i1::g.66351::m.66351	PF00023.30	182	212	4.2e-17
TRINITY_DN21619_c0_g1::TRINITY_DN21619_c0_g1_i1::g.66351::m.66351	PF00023.30	215	235	4.2e-17
TRINITY_DN21619_c0_g1::TRINITY_DN21619_c0_g1_i1::g.66351::m.66351	PF00023.30	263	276	4.2e-17
TRINITY_DN21619_c0_g1::TRINITY_DN21619_c0_g1_i1::g.66351::m.66351	PF00023.30	290	320	4.2e-17
TRINITY_DN21619_c0_g1::TRINITY_DN21619_c0_g1_i1::g.66351::m.66351	PF00023.30	323	353	4.2e-17
TRINITY_DN21619_c0_g1::TRINITY_DN21619_c0_g1_i1::g.66351::m.66351	PF00023.30	356	377	4.2e-17
TRINITY_DN21534_c0_g1::TRINITY_DN21534_c0_g1_i1::g.65559::m.65559	PF00023.30	45	53	6.2e-14
TRINITY_DN21534_c0_g1::TRINITY_DN21534_c0_g1_i1::g.65559::m.65559	PF00023.30	55	88	6.2e-14
TRINITY_DN21534_c0_g1::TRINITY_DN21534_c0_g1_i1::g.65559::m.65559	PF00023.30	90	118	6.2e-14
TRINITY_DN21484_c0_g1::TRINITY_DN21484_c0_g1_i2::g.64452::m.64452	PF00023.30	191	195	2e-09
TRINITY_DN21484_c0_g1::TRINITY_DN21484_c0_g1_i2::g.64452::m.64452	PF00023.30	507	528	2e-09
TRINITY_DN21484_c0_g1::TRINITY_DN21484_c0_g1_i2::g.64452::m.64452	PF00023.30	541	558	2e-09
TRINITY_DN21484_c0_g1::TRINITY_DN21484_c0_g1_i2::g.64452::m.64452	PF00023.30	578	595	2e-09
TRINITY_DN21484_c0_g1::TRINITY_DN21484_c0_g1_i2::g.64452::m.64452	PF00023.30	608	640	2e-09
TRINITY_DN21484_c0_g1::TRINITY_DN21484_c0_g1_i2::g.64452::m.64452	PF00023.30	676	700	2e-09
TRINITY_DN21484_c0_g1::TRINITY_DN21484_c0_g1_i1::g.64442::m.64442	PF00023.30	191	195	2e-09
TRINITY_DN21484_c0_g1::TRINITY_DN21484_c0_g1_i1::g.64442::m.64442	PF00023.30	507	528	2e-09
TRINITY_DN21484_c0_g1::TRINITY_DN21484_c0_g1_i1::g.64442::m.64442	PF00023.30	541	558	2e-09
TRINITY_DN21484_c0_g1::TRINITY_DN21484_c0_g1_i1::g.64442::m.64442	PF00023.30	578	595	2e-09
TRINITY_DN21484_c0_g1::TRINITY_DN21484_c0_g1_i1::g.64442::m.64442	PF00023.30	608	640	2e-09
TRINITY_DN21484_c0_g1::TRINITY_DN21484_c0_g1_i1::g.64442::m.64442	PF00023.30	676	700	2e-09
TRINITY_DN21361_c0_g1::TRINITY_DN21361_c0_g1_i8::g.63631::m.63631	PF00023.30	586	616	2.3e-08
TRINITY_DN21361_c0_g1::TRINITY_DN21361_c0_g1_i8::g.63631::m.63631	PF00023.30	619	646	2.3e-08
TRINITY_DN21361_c0_g1::TRINITY_DN21361_c0_g1_i7::g.63621::m.63621	PF00023.30	586	616	2.3e-08
TRINITY_DN21361_c0_g1::TRINITY_DN21361_c0_g1_i7::g.63621::m.63621	PF00023.30	619	646	2.3e-08
TRINITY_DN21361_c0_g1::TRINITY_DN21361_c0_g1_i6::g.63609::m.63609	PF00023.30	586	616	2.4e-08
TRINITY_DN21361_c0_g1::TRINITY_DN21361_c0_g1_i6::g.63609::m.63609	PF00023.30	619	646	2.4e-08
TRINITY_DN21361_c0_g1::TRINITY_DN21361_c0_g1_i5::g.63598::m.63598	PF00023.30	580	610	2.3e-08
TRINITY_DN21361_c0_g1::TRINITY_DN21361_c0_g1_i5::g.63598::m.63598	PF00023.30	613	640	2.3e-08
TRINITY_DN21361_c0_g1::TRINITY_DN21361_c0_g1_i4::g.63589::m.63589	PF00023.30	580	610	2.3e-08
TRINITY_DN21361_c0_g1::TRINITY_DN21361_c0_g1_i4::g.63589::m.63589	PF00023.30	613	640	2.3e-08
TRINITY_DN21361_c0_g1::TRINITY_DN21361_c0_g1_i1::g.63572::m.63572	PF00023.30	586	616	2.4e-08
TRINITY_DN21361_c0_g1::TRINITY_DN21361_c0_g1_i1::g.63572::m.63572	PF00023.30	619	646	2.4e-08
TRINITY_DN21249_c0_g1::TRINITY_DN21249_c0_g1_i3::g.62649::m.62649	PF00023.30	36	58	3.5e-14
TRINITY_DN21249_c0_g1::TRINITY_DN21249_c0_g1_i3::g.62649::m.62649	PF00023.30	64	93	3.5e-14
TRINITY_DN21249_c0_g1::TRINITY_DN21249_c0_g1_i3::g.62649::m.62649	PF00023.30	96	119	3.5e-14
TRINITY_DN21249_c0_g1::TRINITY_DN21249_c0_g1_i3::g.62649::m.62649	PF00023.30	139	161	3.5e-14
TRINITY_DN21249_c0_g1::TRINITY_DN21249_c0_g1_i3::g.62649::m.62649	PF00023.30	169	196	3.5e-14
TRINITY_DN21249_c0_g1::TRINITY_DN21249_c0_g1_i2::g.62644::m.62644	PF00023.30	84	107	1.7e-44
TRINITY_DN21249_c0_g1::TRINITY_DN21249_c0_g1_i2::g.62644::m.62644	PF00023.30	113	142	1.7e-44
TRINITY_DN21249_c0_g1::TRINITY_DN21249_c0_g1_i2::g.62644::m.62644	PF00023.30	145	168	1.7e-44
TRINITY_DN21249_c0_g1::TRINITY_DN21249_c0_g1_i2::g.62644::m.62644	PF00023.30	190	210	1.7e-44
TRINITY_DN21249_c0_g1::TRINITY_DN21249_c0_g1_i2::g.62644::m.62644	PF00023.30	218	245	1.7e-44
TRINITY_DN21249_c0_g1::TRINITY_DN21249_c0_g1_i2::g.62644::m.62644	PF00023.30	256	282	1.7e-44
TRINITY_DN21249_c0_g1::TRINITY_DN21249_c0_g1_i2::g.62644::m.62644	PF00023.30	291	318	1.7e-44
TRINITY_DN21249_c0_g1::TRINITY_DN21249_c0_g1_i2::g.62644::m.62644	PF00023.30	332	360	1.7e-44
TRINITY_DN21249_c0_g1::TRINITY_DN21249_c0_g1_i2::g.62644::m.62644	PF00023.30	370	395	1.7e-44
TRINITY_DN21249_c0_g1::TRINITY_DN21249_c0_g1_i2::g.62644::m.62644	PF00023.30	406	431	1.7e-44
TRINITY_DN21249_c0_g1::TRINITY_DN21249_c0_g1_i2::g.62644::m.62644	PF00023.30	476	499	1.7e-44
TRINITY_DN21249_c0_g1::TRINITY_DN21249_c0_g1_i1::g.62640::m.62640	PF00023.30	84	107	3e-44
TRINITY_DN21249_c0_g1::TRINITY_DN21249_c0_g1_i1::g.62640::m.62640	PF00023.30	113	142	3e-44
TRINITY_DN21249_c0_g1::TRINITY_DN21249_c0_g1_i1::g.62640::m.62640	PF00023.30	145	168	3e-44
TRINITY_DN21249_c0_g1::TRINITY_DN21249_c0_g1_i1::g.62640::m.62640	PF00023.30	190	210	3e-44
TRINITY_DN21249_c0_g1::TRINITY_DN21249_c0_g1_i1::g.62640::m.62640	PF00023.30	218	245	3e-44
TRINITY_DN21249_c0_g1::TRINITY_DN21249_c0_g1_i1::g.62640::m.62640	PF00023.30	256	282	3e-44
TRINITY_DN21249_c0_g1::TRINITY_DN21249_c0_g1_i1::g.62640::m.62640	PF00023.30	291	319	3e-44
TRINITY_DN21249_c0_g1::TRINITY_DN21249_c0_g1_i1::g.62640::m.62640	PF00023.30	332	360	3e-44
TRINITY_DN21249_c0_g1::TRINITY_DN21249_c0_g1_i1::g.62640::m.62640	PF00023.30	370	395	3e-44
TRINITY_DN21249_c0_g1::TRINITY_DN21249_c0_g1_i1::g.62640::m.62640	PF00023.30	406	431	3e-44
TRINITY_DN21249_c0_g1::TRINITY_DN21249_c0_g1_i1::g.62640::m.62640	PF00023.30	445	470	3e-44
TRINITY_DN21249_c0_g1::TRINITY_DN21249_c0_g1_i1::g.62640::m.62640	PF00023.30	476	499	3e-44
TRINITY_DN21249_c0_g1::TRINITY_DN21249_c0_g1_i1::g.62640::m.62640	PF00023.30	502	521	3e-44
TRINITY_DN21245_c0_g1::TRINITY_DN21245_c0_g1_i1::g.61989::m.61989	PF00023.30	16	47	4.4e-53
TRINITY_DN21245_c0_g1::TRINITY_DN21245_c0_g1_i1::g.61989::m.61989	PF00023.30	49	75	4.4e-53
TRINITY_DN21245_c0_g1::TRINITY_DN21245_c0_g1_i1::g.61989::m.61989	PF00023.30	86	112	4.4e-53
TRINITY_DN21245_c0_g1::TRINITY_DN21245_c0_g1_i1::g.61989::m.61989	PF00023.30	117	146	4.4e-53
TRINITY_DN21245_c0_g1::TRINITY_DN21245_c0_g1_i1::g.61989::m.61989	PF00023.30	149	181	4.4e-53
TRINITY_DN21245_c0_g1::TRINITY_DN21245_c0_g1_i1::g.61989::m.61989	PF00023.30	182	210	4.4e-53
TRINITY_DN21245_c0_g1::TRINITY_DN21245_c0_g1_i1::g.61989::m.61989	PF00023.30	215	246	4.4e-53
TRINITY_DN21245_c0_g1::TRINITY_DN21245_c0_g1_i1::g.61989::m.61989	PF00023.30	249	276	4.4e-53
TRINITY_DN21245_c0_g1::TRINITY_DN21245_c0_g1_i1::g.61989::m.61989	PF00023.30	494	515	4.4e-53
TRINITY_DN21245_c0_g1::TRINITY_DN21245_c0_g1_i1::g.61989::m.61989	PF00023.30	528	545	4.4e-53
TRINITY_DN21245_c0_g1::TRINITY_DN21245_c0_g1_i1::g.61989::m.61989	PF00023.30	554	584	4.4e-53
TRINITY_DN21245_c0_g1::TRINITY_DN21245_c0_g1_i1::g.61989::m.61989	PF00023.30	587	617	4.4e-53
TRINITY_DN21245_c0_g1::TRINITY_DN21245_c0_g1_i1::g.61989::m.61989	PF00023.30	620	650	4.4e-53
TRINITY_DN21245_c0_g1::TRINITY_DN21245_c0_g1_i1::g.61989::m.61989	PF00023.30	653	679	4.4e-53
TRINITY_DN21245_c0_g1::TRINITY_DN21245_c0_g1_i1::g.61989::m.61989	PF00023.30	688	715	4.4e-53
TRINITY_DN21228_c0_g1::TRINITY_DN21228_c0_g1_i1::g.62492::m.62492	PF00023.30	51	77	2.1e-07
TRINITY_DN21228_c0_g1::TRINITY_DN21228_c0_g1_i1::g.62492::m.62492	PF00023.30	84	119	2.1e-07
TRINITY_DN21228_c0_g1::TRINITY_DN21228_c0_g1_i1::g.62492::m.62492	PF00023.30	123	133	2.1e-07
TRINITY_DN21195_c0_g1::TRINITY_DN21195_c0_g1_i1::g.61631::m.61631	PF00023.30	395	421	1.1e-27
TRINITY_DN21195_c0_g1::TRINITY_DN21195_c0_g1_i1::g.61631::m.61631	PF00023.30	424	454	1.1e-27
TRINITY_DN21195_c0_g1::TRINITY_DN21195_c0_g1_i1::g.61631::m.61631	PF00023.30	458	488	1.1e-27
TRINITY_DN21195_c0_g1::TRINITY_DN21195_c0_g1_i1::g.61631::m.61631	PF00023.30	491	523	1.1e-27
TRINITY_DN21195_c0_g1::TRINITY_DN21195_c0_g1_i1::g.61631::m.61631	PF00023.30	524	555	1.1e-27
TRINITY_DN21195_c0_g1::TRINITY_DN21195_c0_g1_i1::g.61631::m.61631	PF00023.30	557	582	1.1e-27
TRINITY_DN21063_c0_g1::TRINITY_DN21063_c0_g1_i1::g.60412::m.60412	PF00023.30	169	183	2.5e-20
TRINITY_DN21063_c0_g1::TRINITY_DN21063_c0_g1_i1::g.60412::m.60412	PF00023.30	212	221	2.5e-20
TRINITY_DN21063_c0_g1::TRINITY_DN21063_c0_g1_i1::g.60412::m.60412	PF00023.30	344	354	2.5e-20
TRINITY_DN21063_c0_g1::TRINITY_DN21063_c0_g1_i1::g.60412::m.60412	PF00023.30	489	504	2.5e-20
TRINITY_DN21063_c0_g1::TRINITY_DN21063_c0_g1_i1::g.60412::m.60412	PF00023.30	508	530	2.5e-20
TRINITY_DN21063_c0_g1::TRINITY_DN21063_c0_g1_i1::g.60412::m.60412	PF00023.30	538	563	2.5e-20
TRINITY_DN21063_c0_g1::TRINITY_DN21063_c0_g1_i1::g.60412::m.60412	PF00023.30	619	636	2.5e-20
TRINITY_DN21063_c0_g1::TRINITY_DN21063_c0_g1_i1::g.60412::m.60412	PF00023.30	639	667	2.5e-20
TRINITY_DN21063_c0_g1::TRINITY_DN21063_c0_g1_i1::g.60412::m.60412	PF00023.30	675	704	2.5e-20
TRINITY_DN21063_c0_g1::TRINITY_DN21063_c0_g1_i1::g.60412::m.60412	PF00023.30	869	890	2.5e-20
TRINITY_DN21063_c0_g1::TRINITY_DN21063_c0_g1_i1::g.60412::m.60412	PF00023.30	903	933	2.5e-20
TRINITY_DN21063_c0_g1::TRINITY_DN21063_c0_g1_i1::g.60412::m.60412	PF00023.30	936	958	2.5e-20
TRINITY_DN21063_c0_g1::TRINITY_DN21063_c0_g1_i1::g.60412::m.60412	PF00023.30	968	997	2.5e-20
TRINITY_DN21025_c1_g1::TRINITY_DN21025_c1_g1_i1::g.61013::m.61013	PF00023.30	244	269	1.8e-13
TRINITY_DN21025_c1_g1::TRINITY_DN21025_c1_g1_i1::g.61013::m.61013	PF00023.30	347	366	1.8e-13
TRINITY_DN21025_c1_g1::TRINITY_DN21025_c1_g1_i1::g.61013::m.61013	PF00023.30	369	397	1.8e-13
TRINITY_DN21025_c1_g1::TRINITY_DN21025_c1_g1_i1::g.61013::m.61013	PF00023.30	401	432	1.8e-13
TRINITY_DN21025_c1_g1::TRINITY_DN21025_c1_g1_i1::g.61013::m.61013	PF00023.30	440	463	1.8e-13
TRINITY_DN21025_c1_g1::TRINITY_DN21025_c1_g1_i1::g.61013::m.61013	PF00023.30	467	496	1.8e-13
TRINITY_DN21025_c1_g1::TRINITY_DN21025_c1_g1_i1::g.61013::m.61013	PF00023.30	500	522	1.8e-13
TRINITY_DN21025_c1_g1::TRINITY_DN21025_c1_g1_i1::g.61013::m.61013	PF00023.30	537	554	1.8e-13
TRINITY_DN21025_c1_g1::TRINITY_DN21025_c1_g1_i1::g.61013::m.61013	PF00023.30	596	603	1.8e-13
TRINITY_DN20975_c0_g1::TRINITY_DN20975_c0_g1_i2::g.60018::m.60018	PF00023.30	2	14	7.5e-25
TRINITY_DN20975_c0_g1::TRINITY_DN20975_c0_g1_i2::g.60018::m.60018	PF00023.30	24	52	7.5e-25
TRINITY_DN20975_c0_g1::TRINITY_DN20975_c0_g1_i2::g.60018::m.60018	PF00023.30	57	85	7.5e-25
TRINITY_DN20975_c0_g1::TRINITY_DN20975_c0_g1_i2::g.60018::m.60018	PF00023.30	87	116	7.5e-25
TRINITY_DN20975_c0_g1::TRINITY_DN20975_c0_g1_i2::g.60018::m.60018	PF00023.30	120	155	7.5e-25
TRINITY_DN20975_c0_g1::TRINITY_DN20975_c0_g1_i2::g.60018::m.60018	PF00023.30	158	186	7.5e-25
TRINITY_DN20975_c0_g1::TRINITY_DN20975_c0_g1_i2::g.60018::m.60018	PF00023.30	188	212	7.5e-25
TRINITY_DN20975_c0_g1::TRINITY_DN20975_c0_g1_i1::g.60013::m.60013	PF00023.30	84	103	1.2e-86
TRINITY_DN20975_c0_g1::TRINITY_DN20975_c0_g1_i1::g.60013::m.60013	PF00023.30	108	136	1.2e-86
TRINITY_DN20975_c0_g1::TRINITY_DN20975_c0_g1_i1::g.60013::m.60013	PF00023.30	150	174	1.2e-86
TRINITY_DN20975_c0_g1::TRINITY_DN20975_c0_g1_i1::g.60013::m.60013	PF00023.30	188	211	1.2e-86
TRINITY_DN20975_c0_g1::TRINITY_DN20975_c0_g1_i1::g.60013::m.60013	PF00023.30	221	243	1.2e-86
TRINITY_DN20975_c0_g1::TRINITY_DN20975_c0_g1_i1::g.60013::m.60013	PF00023.30	261	291	1.2e-86
TRINITY_DN20975_c0_g1::TRINITY_DN20975_c0_g1_i1::g.60013::m.60013	PF00023.30	293	321	1.2e-86
TRINITY_DN20975_c0_g1::TRINITY_DN20975_c0_g1_i1::g.60013::m.60013	PF00023.30	332	358	1.2e-86
TRINITY_DN20975_c0_g1::TRINITY_DN20975_c0_g1_i1::g.60013::m.60013	PF00023.30	363	388	1.2e-86
TRINITY_DN20975_c0_g1::TRINITY_DN20975_c0_g1_i1::g.60013::m.60013	PF00023.30	394	421	1.2e-86
TRINITY_DN20975_c0_g1::TRINITY_DN20975_c0_g1_i1::g.60013::m.60013	PF00023.30	433	458	1.2e-86
TRINITY_DN20975_c0_g1::TRINITY_DN20975_c0_g1_i1::g.60013::m.60013	PF00023.30	465	488	1.2e-86
TRINITY_DN20975_c0_g1::TRINITY_DN20975_c0_g1_i1::g.60013::m.60013	PF00023.30	518	541	1.2e-86
TRINITY_DN20975_c0_g1::TRINITY_DN20975_c0_g1_i1::g.60013::m.60013	PF00023.30	551	579	1.2e-86
TRINITY_DN20975_c0_g1::TRINITY_DN20975_c0_g1_i1::g.60013::m.60013	PF00023.30	584	612	1.2e-86
TRINITY_DN20975_c0_g1::TRINITY_DN20975_c0_g1_i1::g.60013::m.60013	PF00023.30	614	643	1.2e-86
TRINITY_DN20975_c0_g1::TRINITY_DN20975_c0_g1_i1::g.60013::m.60013	PF00023.30	647	682	1.2e-86
TRINITY_DN20975_c0_g1::TRINITY_DN20975_c0_g1_i1::g.60013::m.60013	PF00023.30	685	713	1.2e-86
TRINITY_DN20975_c0_g1::TRINITY_DN20975_c0_g1_i1::g.60013::m.60013	PF00023.30	715	739	1.2e-86
TRINITY_DN20815_c0_g1::TRINITY_DN20815_c0_g1_i1::g.59353::m.59353	PF00023.30	19	33	2.6e-16
TRINITY_DN20815_c0_g1::TRINITY_DN20815_c0_g1_i1::g.59353::m.59353	PF00023.30	58	86	2.6e-16
TRINITY_DN20815_c0_g1::TRINITY_DN20815_c0_g1_i1::g.59353::m.59353	PF00023.30	89	134	2.6e-16
TRINITY_DN20815_c0_g1::TRINITY_DN20815_c0_g1_i1::g.59353::m.59353	PF00023.30	143	172	2.6e-16
TRINITY_DN20815_c0_g1::TRINITY_DN20815_c0_g1_i1::g.59353::m.59353	PF00023.30	175	205	2.6e-16
TRINITY_DN20754_c0_g1::TRINITY_DN20754_c0_g1_i1::g.58622::m.58622	PF00023.30	47	64	8.1e-05
TRINITY_DN20754_c0_g1::TRINITY_DN20754_c0_g1_i1::g.58622::m.58622	PF00023.30	77	104	8.1e-05
TRINITY_DN20754_c0_g1::TRINITY_DN20754_c0_g1_i1::g.58622::m.58622	PF00023.30	106	115	8.1e-05
TRINITY_DN20578_c0_g1::TRINITY_DN20578_c0_g1_i2::g.56965::m.56965	PF00023.30	19	52	1e-13
TRINITY_DN20578_c0_g1::TRINITY_DN20578_c0_g1_i2::g.56965::m.56965	PF00023.30	93	113	1e-13
TRINITY_DN20578_c0_g1::TRINITY_DN20578_c0_g1_i2::g.56965::m.56965	PF00023.30	143	167	1e-13
TRINITY_DN20578_c0_g1::TRINITY_DN20578_c0_g1_i2::g.56965::m.56965	PF00023.30	178	190	1e-13
TRINITY_DN20578_c0_g1::TRINITY_DN20578_c0_g1_i1::g.56963::m.56963	PF00023.30	4	18	1.9e-18
TRINITY_DN20578_c0_g1::TRINITY_DN20578_c0_g1_i1::g.56963::m.56963	PF00023.30	220	253	1.9e-18
TRINITY_DN20578_c0_g1::TRINITY_DN20578_c0_g1_i1::g.56963::m.56963	PF00023.30	294	314	1.9e-18
TRINITY_DN20578_c0_g1::TRINITY_DN20578_c0_g1_i1::g.56963::m.56963	PF00023.30	344	368	1.9e-18
TRINITY_DN20578_c0_g1::TRINITY_DN20578_c0_g1_i1::g.56963::m.56963	PF00023.30	379	403	1.9e-18
TRINITY_DN20578_c0_g1::TRINITY_DN20578_c0_g1_i1::g.56963::m.56963	PF00023.30	411	431	1.9e-18
TRINITY_DN20568_c0_g1::TRINITY_DN20568_c0_g1_i2::g.56567::m.56567	PF00023.30	18	42	1e-08
TRINITY_DN20568_c0_g1::TRINITY_DN20568_c0_g1_i2::g.56567::m.56567	PF00023.30	46	75	1e-08
TRINITY_DN20568_c0_g1::TRINITY_DN20568_c0_g1_i2::g.56567::m.56567	PF00023.30	80	106	1e-08
TRINITY_DN20568_c0_g1::TRINITY_DN20568_c0_g1_i2::g.56567::m.56567	PF00023.30	164	193	1e-08
TRINITY_DN20568_c0_g1::TRINITY_DN20568_c0_g1_i2::g.56567::m.56567	PF00023.30	196	200	1e-08
TRINITY_DN20568_c0_g1::TRINITY_DN20568_c0_g1_i2::g.56567::m.56567	PF00023.30	373	397	1e-08
TRINITY_DN20568_c0_g1::TRINITY_DN20568_c0_g1_i1::g.56565::m.56565	PF00023.30	18	42	1e-08
TRINITY_DN20568_c0_g1::TRINITY_DN20568_c0_g1_i1::g.56565::m.56565	PF00023.30	46	75	1e-08
TRINITY_DN20568_c0_g1::TRINITY_DN20568_c0_g1_i1::g.56565::m.56565	PF00023.30	80	106	1e-08
TRINITY_DN20568_c0_g1::TRINITY_DN20568_c0_g1_i1::g.56565::m.56565	PF00023.30	164	193	1e-08
TRINITY_DN20568_c0_g1::TRINITY_DN20568_c0_g1_i1::g.56565::m.56565	PF00023.30	196	200	1e-08
TRINITY_DN20568_c0_g1::TRINITY_DN20568_c0_g1_i1::g.56565::m.56565	PF00023.30	373	397	1e-08
TRINITY_DN20508_c0_g1::TRINITY_DN20508_c0_g1_i1::g.56809::m.56809	PF00023.30	73	99	1.2e-31
TRINITY_DN20508_c0_g1::TRINITY_DN20508_c0_g1_i1::g.56809::m.56809	PF00023.30	108	136	1.2e-31
TRINITY_DN20508_c0_g1::TRINITY_DN20508_c0_g1_i1::g.56809::m.56809	PF00023.30	142	171	1.2e-31
TRINITY_DN20508_c0_g1::TRINITY_DN20508_c0_g1_i1::g.56809::m.56809	PF00023.30	174	194	1.2e-31
TRINITY_DN20508_c0_g1::TRINITY_DN20508_c0_g1_i1::g.56809::m.56809	PF00023.30	212	233	1.2e-31
TRINITY_DN20508_c0_g1::TRINITY_DN20508_c0_g1_i1::g.56809::m.56809	PF00023.30	252	279	1.2e-31
TRINITY_DN20508_c0_g1::TRINITY_DN20508_c0_g1_i1::g.56809::m.56809	PF00023.30	282	312	1.2e-31
TRINITY_DN20508_c0_g1::TRINITY_DN20508_c0_g1_i1::g.56809::m.56809	PF00023.30	322	334	1.2e-31
TRINITY_DN20162_c0_g1::TRINITY_DN20162_c0_g1_i1::g.54018::m.54018	PF00023.30	527	556	2.1e-08
TRINITY_DN20162_c0_g1::TRINITY_DN20162_c0_g1_i1::g.54018::m.54018	PF00023.30	558	577	2.1e-08
TRINITY_DN20137_c0_g1::TRINITY_DN20137_c0_g1_i1::g.54387::m.54387	PF00023.30	193	223	1.4e-13
TRINITY_DN20137_c0_g1::TRINITY_DN20137_c0_g1_i1::g.54387::m.54387	PF00023.30	228	260	1.4e-13
TRINITY_DN20137_c0_g1::TRINITY_DN20137_c0_g1_i1::g.54387::m.54387	PF00023.30	264	288	1.4e-13
TRINITY_DN20128_c0_g1::TRINITY_DN20128_c0_g1_i2::g.54476::m.54476	PF00023.30	82	111	4.6e-05
TRINITY_DN20128_c0_g1::TRINITY_DN20128_c0_g1_i1::g.54475::m.54475	PF00023.30	49	78	3.4e-05
TRINITY_DN20122_c0_g1::TRINITY_DN20122_c0_g1_i1::g.54559::m.54559	PF00023.30	677	703	3.7e-05
TRINITY_DN20122_c0_g1::TRINITY_DN20122_c0_g1_i1::g.54559::m.54559	PF00023.30	711	723	3.7e-05
TRINITY_DN20122_c0_g1::TRINITY_DN20122_c0_g1_i1::g.54559::m.54559	PF00023.30	754	781	3.7e-05
TRINITY_DN19823_c0_g1::TRINITY_DN19823_c0_g1_i1::g.52240::m.52240	PF00023.30	70	92	5.6e-16
TRINITY_DN19823_c0_g1::TRINITY_DN19823_c0_g1_i1::g.52240::m.52240	PF00023.30	96	119	5.6e-16
TRINITY_DN19823_c0_g1::TRINITY_DN19823_c0_g1_i1::g.52240::m.52240	PF00023.30	131	150	5.6e-16
TRINITY_DN19823_c0_g1::TRINITY_DN19823_c0_g1_i1::g.52240::m.52240	PF00023.30	167	196	5.6e-16
TRINITY_DN19823_c0_g1::TRINITY_DN19823_c0_g1_i1::g.52240::m.52240	PF00023.30	341	374	5.6e-16
TRINITY_DN19823_c0_g1::TRINITY_DN19823_c0_g1_i1::g.52240::m.52240	PF00023.30	377	397	5.6e-16
TRINITY_DN19823_c0_g1::TRINITY_DN19823_c0_g1_i1::g.52240::m.52240	PF00023.30	411	421	5.6e-16
TRINITY_DN19774_c0_g1::TRINITY_DN19774_c0_g1_i2::g.51798::m.51798	PF00023.30	85	112	4.3e-28
TRINITY_DN19774_c0_g1::TRINITY_DN19774_c0_g1_i2::g.51798::m.51798	PF00023.30	121	148	4.3e-28
TRINITY_DN19774_c0_g1::TRINITY_DN19774_c0_g1_i2::g.51798::m.51798	PF00023.30	151	182	4.3e-28
TRINITY_DN19774_c0_g1::TRINITY_DN19774_c0_g1_i2::g.51798::m.51798	PF00023.30	186	214	4.3e-28
TRINITY_DN19774_c0_g1::TRINITY_DN19774_c0_g1_i2::g.51798::m.51798	PF00023.30	217	242	4.3e-28
TRINITY_DN19774_c0_g1::TRINITY_DN19774_c0_g1_i1::g.51793::m.51793	PF00023.30	85	112	4.3e-28
TRINITY_DN19774_c0_g1::TRINITY_DN19774_c0_g1_i1::g.51793::m.51793	PF00023.30	121	148	4.3e-28
TRINITY_DN19774_c0_g1::TRINITY_DN19774_c0_g1_i1::g.51793::m.51793	PF00023.30	151	182	4.3e-28
TRINITY_DN19774_c0_g1::TRINITY_DN19774_c0_g1_i1::g.51793::m.51793	PF00023.30	186	214	4.3e-28
TRINITY_DN19774_c0_g1::TRINITY_DN19774_c0_g1_i1::g.51793::m.51793	PF00023.30	217	242	4.3e-28
TRINITY_DN19731_c0_g1::TRINITY_DN19731_c0_g1_i1::g.51665::m.51665	PF00023.30	243	273	1.1e-13
TRINITY_DN19731_c0_g1::TRINITY_DN19731_c0_g1_i1::g.51665::m.51665	PF00023.30	276	295	1.1e-13
TRINITY_DN19731_c0_g1::TRINITY_DN19731_c0_g1_i1::g.51665::m.51665	PF00023.30	318	337	1.1e-13
TRINITY_DN19412_c0_g1::TRINITY_DN19412_c0_g1_i1::g.49994::m.49994	PF00023.30	203	220	3.9e-23
TRINITY_DN19412_c0_g1::TRINITY_DN19412_c0_g1_i1::g.49994::m.49994	PF00023.30	223	253	3.9e-23
TRINITY_DN19412_c0_g1::TRINITY_DN19412_c0_g1_i1::g.49994::m.49994	PF00023.30	257	283	3.9e-23
TRINITY_DN19412_c0_g1::TRINITY_DN19412_c0_g1_i1::g.49994::m.49994	PF00023.30	289	320	3.9e-23
TRINITY_DN19412_c0_g1::TRINITY_DN19412_c0_g1_i1::g.49994::m.49994	PF00023.30	323	342	3.9e-23
TRINITY_DN19412_c0_g1::TRINITY_DN19412_c0_g1_i1::g.49994::m.49994	PF00023.30	356	370	3.9e-23
TRINITY_DN19412_c0_g1::TRINITY_DN19412_c0_g1_i1::g.49994::m.49994	PF00023.30	389	409	3.9e-23
TRINITY_DN19412_c0_g1::TRINITY_DN19412_c0_g1_i1::g.49994::m.49994	PF00023.30	429	452	3.9e-23
TRINITY_DN19412_c0_g1::TRINITY_DN19412_c0_g1_i1::g.49994::m.49994	PF00023.30	465	482	3.9e-23
TRINITY_DN19399_c0_g1::TRINITY_DN19399_c0_g1_i1::g.49183::m.49183	PF00023.30	2	34	2.5e-16
TRINITY_DN19399_c0_g1::TRINITY_DN19399_c0_g1_i1::g.49183::m.49183	PF00023.30	42	71	2.5e-16
TRINITY_DN19399_c0_g1::TRINITY_DN19399_c0_g1_i1::g.49183::m.49183	PF00023.30	81	104	2.5e-16
TRINITY_DN19399_c0_g1::TRINITY_DN19399_c0_g1_i1::g.49183::m.49183	PF00023.30	107	135	2.5e-16
TRINITY_DN19399_c0_g1::TRINITY_DN19399_c0_g1_i1::g.49183::m.49183	PF00023.30	147	171	2.5e-16
TRINITY_DN19399_c0_g1::TRINITY_DN19399_c0_g1_i1::g.49183::m.49183	PF00023.30	223	239	2.5e-16
TRINITY_DN19399_c0_g1::TRINITY_DN19399_c0_g1_i1::g.49183::m.49183	PF00023.30	242	278	2.5e-16
TRINITY_DN19399_c0_g1::TRINITY_DN19399_c0_g1_i1::g.49183::m.49183	PF00023.30	293	308	2.5e-16
TRINITY_DN19399_c0_g1::TRINITY_DN19399_c0_g1_i1::g.49183::m.49183	PF00023.30	324	330	2.5e-16
TRINITY_DN19399_c0_g1::TRINITY_DN19399_c0_g1_i1::g.49183::m.49183	PF00023.30	366	377	2.5e-16
TRINITY_DN19394_c0_g1::TRINITY_DN19394_c0_g1_i2::g.49109::m.49109	PF00023.30	82	106	1.1e-14
TRINITY_DN19394_c0_g1::TRINITY_DN19394_c0_g1_i2::g.49109::m.49109	PF00023.30	112	137	1.1e-14
TRINITY_DN19394_c0_g1::TRINITY_DN19394_c0_g1_i2::g.49109::m.49109	PF00023.30	140	168	1.1e-14
TRINITY_DN19394_c0_g1::TRINITY_DN19394_c0_g1_i2::g.49109::m.49109	PF00023.30	179	200	1.1e-14
TRINITY_DN19394_c0_g1::TRINITY_DN19394_c0_g1_i2::g.49109::m.49109	PF00023.30	210	231	1.1e-14
TRINITY_DN19394_c0_g1::TRINITY_DN19394_c0_g1_i2::g.49109::m.49109	PF00023.30	236	262	1.1e-14
TRINITY_DN19394_c0_g1::TRINITY_DN19394_c0_g1_i2::g.49109::m.49109	PF00023.30	299	321	1.1e-14
TRINITY_DN19394_c0_g1::TRINITY_DN19394_c0_g1_i2::g.49109::m.49109	PF00023.30	329	348	1.1e-14
TRINITY_DN19394_c0_g1::TRINITY_DN19394_c0_g1_i2::g.49109::m.49109	PF00023.30	356	380	1.1e-14
TRINITY_DN19394_c0_g1::TRINITY_DN19394_c0_g1_i2::g.49109::m.49109	PF00023.30	387	404	1.1e-14
TRINITY_DN19394_c0_g1::TRINITY_DN19394_c0_g1_i2::g.49109::m.49109	PF00023.30	425	443	1.1e-14
TRINITY_DN19394_c0_g1::TRINITY_DN19394_c0_g1_i2::g.49109::m.49109	PF00023.30	455	472	1.1e-14
TRINITY_DN19394_c0_g1::TRINITY_DN19394_c0_g1_i1::g.49107::m.49107	PF00023.30	78	102	1.2e-10
TRINITY_DN19394_c0_g1::TRINITY_DN19394_c0_g1_i1::g.49107::m.49107	PF00023.30	109	133	1.2e-10
TRINITY_DN19394_c0_g1::TRINITY_DN19394_c0_g1_i1::g.49107::m.49107	PF00023.30	136	164	1.2e-10
TRINITY_DN19394_c0_g1::TRINITY_DN19394_c0_g1_i1::g.49107::m.49107	PF00023.30	175	196	1.2e-10
TRINITY_DN19394_c0_g1::TRINITY_DN19394_c0_g1_i1::g.49107::m.49107	PF00023.30	208	227	1.2e-10
TRINITY_DN19394_c0_g1::TRINITY_DN19394_c0_g1_i1::g.49107::m.49107	PF00023.30	232	258	1.2e-10
TRINITY_DN19289_c0_g1::TRINITY_DN19289_c0_g1_i2::g.48517::m.48517	PF00023.30	24	46	1.8e-25
TRINITY_DN19289_c0_g1::TRINITY_DN19289_c0_g1_i2::g.48517::m.48517	PF00023.30	56	84	1.8e-25
TRINITY_DN19289_c0_g1::TRINITY_DN19289_c0_g1_i2::g.48517::m.48517	PF00023.30	91	116	1.8e-25
TRINITY_DN19289_c0_g1::TRINITY_DN19289_c0_g1_i2::g.48517::m.48517	PF00023.30	123	150	1.8e-25
TRINITY_DN19289_c0_g1::TRINITY_DN19289_c0_g1_i2::g.48517::m.48517	PF00023.30	157	163	1.8e-25
TRINITY_DN19289_c0_g1::TRINITY_DN19289_c0_g1_i1::g.48511::m.48511	PF00023.30	160	182	2.2e-26
TRINITY_DN19289_c0_g1::TRINITY_DN19289_c0_g1_i1::g.48511::m.48511	PF00023.30	192	220	2.2e-26
TRINITY_DN19289_c0_g1::TRINITY_DN19289_c0_g1_i1::g.48511::m.48511	PF00023.30	227	250	2.2e-26
TRINITY_DN19289_c0_g1::TRINITY_DN19289_c0_g1_i1::g.48511::m.48511	PF00023.30	259	286	2.2e-26
TRINITY_DN19289_c0_g1::TRINITY_DN19289_c0_g1_i1::g.48511::m.48511	PF00023.30	293	317	2.2e-26
TRINITY_DN19074_c0_g1::TRINITY_DN19074_c0_g1_i1::g.47367::m.47367	PF00023.30	20	27	1.8e-12
TRINITY_DN19074_c0_g1::TRINITY_DN19074_c0_g1_i1::g.47367::m.47367	PF00023.30	32	63	1.8e-12
TRINITY_DN19074_c0_g1::TRINITY_DN19074_c0_g1_i1::g.47367::m.47367	PF00023.30	66	96	1.8e-12
TRINITY_DN19074_c0_g1::TRINITY_DN19074_c0_g1_i1::g.47367::m.47367	PF00023.30	100	130	1.8e-12
TRINITY_DN19074_c0_g1::TRINITY_DN19074_c0_g1_i1::g.47367::m.47367	PF00023.30	139	150	1.8e-12
TRINITY_DN19074_c0_g1::TRINITY_DN19074_c0_g1_i1::g.47364::m.47364	PF00023.30	80	94	2.3e-17
TRINITY_DN19074_c0_g1::TRINITY_DN19074_c0_g1_i1::g.47364::m.47364	PF00023.30	97	121	2.3e-17
TRINITY_DN19074_c0_g1::TRINITY_DN19074_c0_g1_i1::g.47364::m.47364	PF00023.30	131	155	2.3e-17
TRINITY_DN19074_c0_g1::TRINITY_DN19074_c0_g1_i1::g.47364::m.47364	PF00023.30	209	231	2.3e-17
TRINITY_DN19074_c0_g1::TRINITY_DN19074_c0_g1_i1::g.47364::m.47364	PF00023.30	308	333	2.3e-17
TRINITY_DN19074_c0_g1::TRINITY_DN19074_c0_g1_i1::g.47364::m.47364	PF00023.30	336	364	2.3e-17
TRINITY_DN19074_c0_g1::TRINITY_DN19074_c0_g1_i1::g.47364::m.47364	PF00023.30	381	396	2.3e-17
TRINITY_DN19074_c0_g1::TRINITY_DN19074_c0_g1_i1::g.47364::m.47364	PF00023.30	411	421	2.3e-17
TRINITY_DN19074_c0_g1::TRINITY_DN19074_c0_g1_i1::g.47364::m.47364	PF00023.30	476	485	2.3e-17
TRINITY_DN19074_c0_g1::TRINITY_DN19074_c0_g1_i1::g.47364::m.47364	PF00023.30	530	555	2.3e-17
TRINITY_DN19074_c0_g1::TRINITY_DN19074_c0_g1_i1::g.47364::m.47364	PF00023.30	563	586	2.3e-17
TRINITY_DN18921_c0_g1::TRINITY_DN18921_c0_g1_i1::g.46640::m.46640	PF00023.30	16	43	1.2e-11
TRINITY_DN18921_c0_g1::TRINITY_DN18921_c0_g1_i1::g.46640::m.46640	PF00023.30	81	99	1.2e-11
TRINITY_DN18921_c0_g1::TRINITY_DN18921_c0_g1_i1::g.46640::m.46640	PF00023.30	116	141	1.2e-11
TRINITY_DN18921_c0_g1::TRINITY_DN18921_c0_g1_i1::g.46640::m.46640	PF00023.30	153	183	1.2e-11
TRINITY_DN18921_c0_g1::TRINITY_DN18921_c0_g1_i1::g.46640::m.46640	PF00023.30	185	206	1.2e-11
TRINITY_DN18522_c0_g1::TRINITY_DN18522_c0_g1_i1::g.44547::m.44547	PF00023.30	1	10	4.9e-27
TRINITY_DN18522_c0_g1::TRINITY_DN18522_c0_g1_i1::g.44547::m.44547	PF00023.30	21	49	4.9e-27
TRINITY_DN18522_c0_g1::TRINITY_DN18522_c0_g1_i1::g.44547::m.44547	PF00023.30	56	96	4.9e-27
TRINITY_DN18522_c0_g1::TRINITY_DN18522_c0_g1_i1::g.44547::m.44547	PF00023.30	110	122	4.9e-27
TRINITY_DN18522_c0_g1::TRINITY_DN18522_c0_g1_i1::g.44547::m.44547	PF00023.30	148	175	4.9e-27
TRINITY_DN18522_c0_g1::TRINITY_DN18522_c0_g1_i1::g.44547::m.44547	PF00023.30	181	208	4.9e-27
TRINITY_DN18522_c0_g1::TRINITY_DN18522_c0_g1_i1::g.44547::m.44547	PF00023.30	218	249	4.9e-27
TRINITY_DN18522_c0_g1::TRINITY_DN18522_c0_g1_i1::g.44547::m.44547	PF00023.30	253	285	4.9e-27
TRINITY_DN18522_c0_g1::TRINITY_DN18522_c0_g1_i1::g.44547::m.44547	PF00023.30	292	315	4.9e-27
TRINITY_DN18517_c0_g1::TRINITY_DN18517_c0_g1_i9::g.44524::m.44524	PF00023.30	20	34	3.3e-14
TRINITY_DN18517_c0_g1::TRINITY_DN18517_c0_g1_i9::g.44524::m.44524	PF00023.30	55	80	3.3e-14
TRINITY_DN18517_c0_g1::TRINITY_DN18517_c0_g1_i9::g.44524::m.44524	PF00023.30	85	114	3.3e-14
TRINITY_DN18517_c0_g1::TRINITY_DN18517_c0_g1_i9::g.44524::m.44524	PF00023.30	119	130	3.3e-14
TRINITY_DN18517_c0_g1::TRINITY_DN18517_c0_g1_i8::g.44522::m.44522	PF00023.30	20	34	2.5e-25
TRINITY_DN18517_c0_g1::TRINITY_DN18517_c0_g1_i8::g.44522::m.44522	PF00023.30	55	80	2.5e-25
TRINITY_DN18517_c0_g1::TRINITY_DN18517_c0_g1_i8::g.44522::m.44522	PF00023.30	85	113	2.5e-25
TRINITY_DN18517_c0_g1::TRINITY_DN18517_c0_g1_i8::g.44522::m.44522	PF00023.30	118	145	2.5e-25
TRINITY_DN18517_c0_g1::TRINITY_DN18517_c0_g1_i8::g.44522::m.44522	PF00023.30	151	179	2.5e-25
TRINITY_DN18517_c0_g1::TRINITY_DN18517_c0_g1_i7::g.44520::m.44520	PF00023.30	20	34	3e-27
TRINITY_DN18517_c0_g1::TRINITY_DN18517_c0_g1_i7::g.44520::m.44520	PF00023.30	55	80	3e-27
TRINITY_DN18517_c0_g1::TRINITY_DN18517_c0_g1_i7::g.44520::m.44520	PF00023.30	85	113	3e-27
TRINITY_DN18517_c0_g1::TRINITY_DN18517_c0_g1_i7::g.44520::m.44520	PF00023.30	118	145	3e-27
TRINITY_DN18517_c0_g1::TRINITY_DN18517_c0_g1_i7::g.44520::m.44520	PF00023.30	151	179	3e-27
TRINITY_DN18517_c0_g1::TRINITY_DN18517_c0_g1_i7::g.44520::m.44520	PF00023.30	184	193	3e-27
TRINITY_DN18517_c0_g1::TRINITY_DN18517_c0_g1_i6::g.44518::m.44518	PF00023.30	37	62	6.4e-31
TRINITY_DN18517_c0_g1::TRINITY_DN18517_c0_g1_i6::g.44518::m.44518	PF00023.30	67	95	6.4e-31
TRINITY_DN18517_c0_g1::TRINITY_DN18517_c0_g1_i6::g.44518::m.44518	PF00023.30	100	131	6.4e-31
TRINITY_DN18517_c0_g1::TRINITY_DN18517_c0_g1_i6::g.44518::m.44518	PF00023.30	134	162	6.4e-31
TRINITY_DN18517_c0_g1::TRINITY_DN18517_c0_g1_i6::g.44518::m.44518	PF00023.30	166	186	6.4e-31
TRINITY_DN18517_c0_g1::TRINITY_DN18517_c0_g1_i4::g.44516::m.44516	PF00023.30	20	34	1.5e-29
TRINITY_DN18517_c0_g1::TRINITY_DN18517_c0_g1_i4::g.44516::m.44516	PF00023.30	55	80	1.5e-29
TRINITY_DN18517_c0_g1::TRINITY_DN18517_c0_g1_i4::g.44516::m.44516	PF00023.30	85	113	1.5e-29
TRINITY_DN18517_c0_g1::TRINITY_DN18517_c0_g1_i4::g.44516::m.44516	PF00023.30	118	145	1.5e-29
TRINITY_DN18517_c0_g1::TRINITY_DN18517_c0_g1_i4::g.44516::m.44516	PF00023.30	151	179	1.5e-29
TRINITY_DN18517_c0_g1::TRINITY_DN18517_c0_g1_i4::g.44516::m.44516	PF00023.30	184	193	1.5e-29
TRINITY_DN18517_c0_g1::TRINITY_DN18517_c0_g1_i3::g.44514::m.44514	PF00023.30	13	43	2.6e-30
TRINITY_DN18517_c0_g1::TRINITY_DN18517_c0_g1_i3::g.44514::m.44514	PF00023.30	46	73	2.6e-30
TRINITY_DN18517_c0_g1::TRINITY_DN18517_c0_g1_i3::g.44514::m.44514	PF00023.30	78	105	2.6e-30
TRINITY_DN18517_c0_g1::TRINITY_DN18517_c0_g1_i3::g.44514::m.44514	PF00023.30	111	139	2.6e-30
TRINITY_DN18517_c0_g1::TRINITY_DN18517_c0_g1_i2::g.44511::m.44511	PF00023.30	13	43	8.6e-35
TRINITY_DN18517_c0_g1::TRINITY_DN18517_c0_g1_i2::g.44511::m.44511	PF00023.30	46	73	8.6e-35
TRINITY_DN18517_c0_g1::TRINITY_DN18517_c0_g1_i2::g.44511::m.44511	PF00023.30	78	105	8.6e-35
TRINITY_DN18517_c0_g1::TRINITY_DN18517_c0_g1_i2::g.44511::m.44511	PF00023.30	111	139	8.6e-35
TRINITY_DN18517_c0_g1::TRINITY_DN18517_c0_g1_i2::g.44511::m.44511	PF00023.30	144	153	8.6e-35
TRINITY_DN18517_c0_g1::TRINITY_DN18517_c0_g1_i11::g.44528::m.44528	PF00023.30	20	34	3.7e-28
TRINITY_DN18517_c0_g1::TRINITY_DN18517_c0_g1_i11::g.44528::m.44528	PF00023.30	55	80	3.7e-28
TRINITY_DN18517_c0_g1::TRINITY_DN18517_c0_g1_i11::g.44528::m.44528	PF00023.30	85	113	3.7e-28
TRINITY_DN18517_c0_g1::TRINITY_DN18517_c0_g1_i11::g.44528::m.44528	PF00023.30	119	147	3.7e-28
TRINITY_DN18517_c0_g1::TRINITY_DN18517_c0_g1_i11::g.44528::m.44528	PF00023.30	151	184	3.7e-28
TRINITY_DN18517_c0_g1::TRINITY_DN18517_c0_g1_i11::g.44528::m.44528	PF00023.30	184	205	3.7e-28
TRINITY_DN18517_c0_g1::TRINITY_DN18517_c0_g1_i10::g.44525::m.44525	PF00023.30	20	34	7.7e-30
TRINITY_DN18517_c0_g1::TRINITY_DN18517_c0_g1_i10::g.44525::m.44525	PF00023.30	55	80	7.7e-30
TRINITY_DN18517_c0_g1::TRINITY_DN18517_c0_g1_i10::g.44525::m.44525	PF00023.30	85	113	7.7e-30
TRINITY_DN18517_c0_g1::TRINITY_DN18517_c0_g1_i10::g.44525::m.44525	PF00023.30	118	149	7.7e-30
TRINITY_DN18517_c0_g1::TRINITY_DN18517_c0_g1_i10::g.44525::m.44525	PF00023.30	152	179	7.7e-30
TRINITY_DN18517_c0_g1::TRINITY_DN18517_c0_g1_i10::g.44525::m.44525	PF00023.30	184	193	7.7e-30
TRINITY_DN18517_c0_g1::TRINITY_DN18517_c0_g1_i1::g.44510::m.44510	PF00023.30	20	34	3.6e-28
TRINITY_DN18517_c0_g1::TRINITY_DN18517_c0_g1_i1::g.44510::m.44510	PF00023.30	55	80	3.6e-28
TRINITY_DN18517_c0_g1::TRINITY_DN18517_c0_g1_i1::g.44510::m.44510	PF00023.30	85	113	3.6e-28
TRINITY_DN18517_c0_g1::TRINITY_DN18517_c0_g1_i1::g.44510::m.44510	PF00023.30	119	147	3.6e-28
TRINITY_DN18517_c0_g1::TRINITY_DN18517_c0_g1_i1::g.44510::m.44510	PF00023.30	151	184	3.6e-28
TRINITY_DN18517_c0_g1::TRINITY_DN18517_c0_g1_i1::g.44510::m.44510	PF00023.30	184	205	3.6e-28
TRINITY_DN18286_c0_g1::TRINITY_DN18286_c0_g1_i1::g.43435::m.43435	PF00023.30	131	142	4.4e-11
TRINITY_DN18286_c0_g1::TRINITY_DN18286_c0_g1_i1::g.43435::m.43435	PF00023.30	431	462	4.4e-11
TRINITY_DN18286_c0_g1::TRINITY_DN18286_c0_g1_i1::g.43435::m.43435	PF00023.30	466	494	4.4e-11
TRINITY_DN18286_c0_g1::TRINITY_DN18286_c0_g1_i1::g.43435::m.43435	PF00023.30	546	570	4.4e-11
TRINITY_DN18192_c0_g1::TRINITY_DN18192_c0_g1_i2::g.42637::m.42637	PF00023.30	91	107	1.2e-13
TRINITY_DN18192_c0_g1::TRINITY_DN18192_c0_g1_i2::g.42637::m.42637	PF00023.30	128	152	1.2e-13
TRINITY_DN18192_c0_g1::TRINITY_DN18192_c0_g1_i2::g.42637::m.42637	PF00023.30	170	179	1.2e-13
TRINITY_DN18192_c0_g1::TRINITY_DN18192_c0_g1_i2::g.42637::m.42637	PF00023.30	236	248	1.2e-13
TRINITY_DN18192_c0_g1::TRINITY_DN18192_c0_g1_i2::g.42637::m.42637	PF00023.30	274	294	1.2e-13
TRINITY_DN18192_c0_g1::TRINITY_DN18192_c0_g1_i2::g.42637::m.42637	PF00023.30	317	342	1.2e-13
TRINITY_DN18192_c0_g1::TRINITY_DN18192_c0_g1_i2::g.42637::m.42637	PF00023.30	350	370	1.2e-13
TRINITY_DN18192_c0_g1::TRINITY_DN18192_c0_g1_i1::g.42635::m.42635	PF00023.30	2	14	8.3e-15
TRINITY_DN18192_c0_g1::TRINITY_DN18192_c0_g1_i1::g.42635::m.42635	PF00023.30	40	60	8.3e-15
TRINITY_DN18192_c0_g1::TRINITY_DN18192_c0_g1_i1::g.42635::m.42635	PF00023.30	83	109	8.3e-15
TRINITY_DN18192_c0_g1::TRINITY_DN18192_c0_g1_i1::g.42635::m.42635	PF00023.30	116	138	8.3e-15
TRINITY_DN18083_c0_g1::TRINITY_DN18083_c0_g1_i4::g.41966::m.41966	PF00023.30	1	14	4.1e-19
TRINITY_DN18083_c0_g1::TRINITY_DN18083_c0_g1_i4::g.41966::m.41966	PF00023.30	22	52	4.1e-19
TRINITY_DN18083_c0_g1::TRINITY_DN18083_c0_g1_i4::g.41966::m.41966	PF00023.30	98	117	4.1e-19
TRINITY_DN18083_c0_g1::TRINITY_DN18083_c0_g1_i4::g.41966::m.41966	PF00023.30	142	167	4.1e-19
TRINITY_DN18083_c0_g1::TRINITY_DN18083_c0_g1_i4::g.41966::m.41966	PF00023.30	184	195	4.1e-19
TRINITY_DN18083_c0_g1::TRINITY_DN18083_c0_g1_i1::g.41956::m.41956	PF00023.30	1	14	4.1e-19
TRINITY_DN18083_c0_g1::TRINITY_DN18083_c0_g1_i1::g.41956::m.41956	PF00023.30	22	52	4.1e-19
TRINITY_DN18083_c0_g1::TRINITY_DN18083_c0_g1_i1::g.41956::m.41956	PF00023.30	98	117	4.1e-19
TRINITY_DN18083_c0_g1::TRINITY_DN18083_c0_g1_i1::g.41956::m.41956	PF00023.30	142	167	4.1e-19
TRINITY_DN18083_c0_g1::TRINITY_DN18083_c0_g1_i1::g.41956::m.41956	PF00023.30	184	195	4.1e-19
TRINITY_DN18059_c0_g1::TRINITY_DN18059_c0_g1_i4::g.42110::m.42110	PF00023.30	5	16	5.7e-05
TRINITY_DN18059_c0_g1::TRINITY_DN18059_c0_g1_i4::g.42110::m.42110	PF00023.30	47	47	5.7e-05
TRINITY_DN18059_c0_g1::TRINITY_DN18059_c0_g1_i4::g.42110::m.42110	PF00023.30	68	97	5.7e-05
TRINITY_DN18059_c0_g1::TRINITY_DN18059_c0_g1_i4::g.42110::m.42110	PF00023.30	125	137	5.7e-05
TRINITY_DN18059_c0_g1::TRINITY_DN18059_c0_g1_i3::g.42108::m.42108	PF00023.30	148	158	0.00013
TRINITY_DN18059_c0_g1::TRINITY_DN18059_c0_g1_i3::g.42108::m.42108	PF00023.30	211	240	0.00013
TRINITY_DN18059_c0_g1::TRINITY_DN18059_c0_g1_i3::g.42108::m.42108	PF00023.30	268	280	0.00013
TRINITY_DN18059_c0_g1::TRINITY_DN18059_c0_g1_i2::g.42106::m.42106	PF00023.30	5	16	7.6e-05
TRINITY_DN18059_c0_g1::TRINITY_DN18059_c0_g1_i2::g.42106::m.42106	PF00023.30	49	62	7.6e-05
TRINITY_DN18059_c0_g1::TRINITY_DN18059_c0_g1_i2::g.42106::m.42106	PF00023.30	68	97	7.6e-05
TRINITY_DN18059_c0_g1::TRINITY_DN18059_c0_g1_i2::g.42106::m.42106	PF00023.30	125	137	7.6e-05
TRINITY_DN18022_c0_g1::TRINITY_DN18022_c0_g1_i1::g.42026::m.42026	PF00023.30	377	403	5.9e-09
TRINITY_DN18022_c0_g1::TRINITY_DN18022_c0_g1_i1::g.42026::m.42026	PF00023.30	412	432	5.9e-09
TRINITY_DN18022_c0_g1::TRINITY_DN18022_c0_g1_i1::g.42026::m.42026	PF00023.30	442	465	5.9e-09
TRINITY_DN18022_c0_g1::TRINITY_DN18022_c0_g1_i1::g.42026::m.42026	PF00023.30	470	491	5.9e-09
TRINITY_DN18022_c0_g1::TRINITY_DN18022_c0_g1_i1::g.42026::m.42026	PF00023.30	501	523	5.9e-09
TRINITY_DN18022_c0_g1::TRINITY_DN18022_c0_g1_i1::g.42026::m.42026	PF00023.30	528	558	5.9e-09
TRINITY_DN17920_c0_g1::TRINITY_DN17920_c0_g1_i2::g.41640::m.41640	PF00023.30	17	47	1.5e-16
TRINITY_DN17920_c0_g1::TRINITY_DN17920_c0_g1_i2::g.41640::m.41640	PF00023.30	49	79	1.5e-16
TRINITY_DN17920_c0_g1::TRINITY_DN17920_c0_g1_i2::g.41640::m.41640	PF00023.30	82	104	1.5e-16
TRINITY_DN17920_c0_g1::TRINITY_DN17920_c0_g1_i2::g.41640::m.41640	PF00023.30	126	145	1.5e-16
TRINITY_DN17920_c0_g1::TRINITY_DN17920_c0_g1_i1::g.41638::m.41638	PF00023.30	5	32	9.4e-19
TRINITY_DN17920_c0_g1::TRINITY_DN17920_c0_g1_i1::g.41638::m.41638	PF00023.30	38	68	9.4e-19
TRINITY_DN17920_c0_g1::TRINITY_DN17920_c0_g1_i1::g.41638::m.41638	PF00023.30	70	100	9.4e-19
TRINITY_DN17920_c0_g1::TRINITY_DN17920_c0_g1_i1::g.41638::m.41638	PF00023.30	103	125	9.4e-19
TRINITY_DN17920_c0_g1::TRINITY_DN17920_c0_g1_i1::g.41638::m.41638	PF00023.30	147	166	9.4e-19
TRINITY_DN17866_c0_g1::TRINITY_DN17866_c0_g1_i1::g.41193::m.41193	PF00023.30	19	45	4.8e-27
TRINITY_DN17866_c0_g1::TRINITY_DN17866_c0_g1_i1::g.41193::m.41193	PF00023.30	52	83	4.8e-27
TRINITY_DN17866_c0_g1::TRINITY_DN17866_c0_g1_i1::g.41193::m.41193	PF00023.30	93	109	4.8e-27
TRINITY_DN17866_c0_g1::TRINITY_DN17866_c0_g1_i1::g.41193::m.41193	PF00023.30	128	159	4.8e-27
TRINITY_DN17866_c0_g1::TRINITY_DN17866_c0_g1_i1::g.41193::m.41193	PF00023.30	166	189	4.8e-27
TRINITY_DN17866_c0_g1::TRINITY_DN17866_c0_g1_i1::g.41193::m.41193	PF00023.30	200	218	4.8e-27
TRINITY_DN17866_c0_g1::TRINITY_DN17866_c0_g1_i1::g.41193::m.41193	PF00023.30	238	258	4.8e-27
TRINITY_DN17866_c0_g1::TRINITY_DN17866_c0_g1_i1::g.41193::m.41193	PF00023.30	281	312	4.8e-27
TRINITY_DN17866_c0_g1::TRINITY_DN17866_c0_g1_i1::g.41193::m.41193	PF00023.30	345	364	4.8e-27
TRINITY_DN17866_c0_g1::TRINITY_DN17866_c0_g1_i1::g.41193::m.41193	PF00023.30	378	397	4.8e-27
TRINITY_DN17794_c0_g1::TRINITY_DN17794_c0_g1_i1::g.40732::m.40732	PF00023.30	283	316	2.3e-08
TRINITY_DN17794_c0_g1::TRINITY_DN17794_c0_g1_i1::g.40732::m.40732	PF00023.30	318	339	2.3e-08
TRINITY_DN17777_c0_g1::TRINITY_DN17777_c0_g1_i2::g.40765::m.40765	PF00023.30	349	375	2.2e-06
TRINITY_DN17777_c0_g1::TRINITY_DN17777_c0_g1_i2::g.40765::m.40765	PF00023.30	381	406	2.2e-06
TRINITY_DN17777_c0_g1::TRINITY_DN17777_c0_g1_i1::g.40761::m.40761	PF00023.30	349	375	6e-06
TRINITY_DN17777_c0_g1::TRINITY_DN17777_c0_g1_i1::g.40761::m.40761	PF00023.30	381	406	6e-06
TRINITY_DN17673_c0_g1::TRINITY_DN17673_c0_g1_i1::g.40564::m.40564	PF00023.30	88	107	3.3e-15
TRINITY_DN17673_c0_g1::TRINITY_DN17673_c0_g1_i1::g.40564::m.40564	PF00023.30	127	149	3.3e-15
TRINITY_DN17673_c0_g1::TRINITY_DN17673_c0_g1_i1::g.40564::m.40564	PF00023.30	183	200	3.3e-15
TRINITY_DN17673_c0_g1::TRINITY_DN17673_c0_g1_i1::g.40564::m.40564	PF00023.30	217	245	3.3e-15
TRINITY_DN17673_c0_g1::TRINITY_DN17673_c0_g1_i1::g.40564::m.40564	PF00023.30	248	276	3.3e-15
TRINITY_DN17673_c0_g1::TRINITY_DN17673_c0_g1_i1::g.40564::m.40564	PF00023.30	322	341	3.3e-15
TRINITY_DN17673_c0_g1::TRINITY_DN17673_c0_g1_i1::g.40564::m.40564	PF00023.30	432	451	3.3e-15
TRINITY_DN17617_c0_g1::TRINITY_DN17617_c0_g1_i1::g.40570::m.40570	PF00023.30	68	88	1.9e-14
TRINITY_DN17617_c0_g1::TRINITY_DN17617_c0_g1_i1::g.40570::m.40570	PF00023.30	100	128	1.9e-14
TRINITY_DN17617_c0_g1::TRINITY_DN17617_c0_g1_i1::g.40570::m.40570	PF00023.30	130	158	1.9e-14
TRINITY_DN17617_c0_g1::TRINITY_DN17617_c0_g1_i1::g.40570::m.40570	PF00023.30	167	191	1.9e-14
TRINITY_DN17600_c0_g1::TRINITY_DN17600_c0_g1_i1::g.40543::m.40543	PF00023.30	245	252	2.8e-06
TRINITY_DN17600_c0_g1::TRINITY_DN17600_c0_g1_i1::g.40543::m.40543	PF00023.30	288	316	2.8e-06
TRINITY_DN17600_c0_g1::TRINITY_DN17600_c0_g1_i1::g.40543::m.40543	PF00023.30	321	335	2.8e-06
TRINITY_DN17600_c0_g1::TRINITY_DN17600_c0_g1_i1::g.40543::m.40543	PF00023.30	377	392	2.8e-06
TRINITY_DN17600_c0_g1::TRINITY_DN17600_c0_g1_i1::g.40543::m.40543	PF00023.30	395	426	2.8e-06
TRINITY_DN17375_c0_g1::TRINITY_DN17375_c0_g1_i1::g.38876::m.38876	PF00023.30	69	96	5.3e-06
TRINITY_DN17375_c0_g1::TRINITY_DN17375_c0_g1_i1::g.38876::m.38876	PF00023.30	186	208	5.3e-06
TRINITY_DN17375_c0_g1::TRINITY_DN17375_c0_g1_i1::g.38876::m.38876	PF00023.30	222	233	5.3e-06
TRINITY_DN17330_c0_g1::TRINITY_DN17330_c0_g1_i1::g.38821::m.38821	PF00023.30	197	223	1.2e-09
TRINITY_DN17330_c0_g1::TRINITY_DN17330_c0_g1_i1::g.38821::m.38821	PF00023.30	232	259	1.2e-09
TRINITY_DN17330_c0_g1::TRINITY_DN17330_c0_g1_i1::g.38821::m.38821	PF00023.30	269	294	1.2e-09
TRINITY_DN17330_c0_g1::TRINITY_DN17330_c0_g1_i1::g.38821::m.38821	PF00023.30	319	336	1.2e-09
TRINITY_DN17330_c0_g1::TRINITY_DN17330_c0_g1_i1::g.38821::m.38821	PF00023.30	354	381	1.2e-09
TRINITY_DN17330_c0_g1::TRINITY_DN17330_c0_g1_i1::g.38821::m.38821	PF00023.30	390	411	1.2e-09
TRINITY_DN17202_c0_g1::TRINITY_DN17202_c0_g1_i2::g.38539::m.38539	PF00023.30	39	47	1.2e-08
TRINITY_DN17202_c0_g1::TRINITY_DN17202_c0_g1_i2::g.38539::m.38539	PF00023.30	254	285	1.2e-08
TRINITY_DN17202_c0_g1::TRINITY_DN17202_c0_g1_i2::g.38539::m.38539	PF00023.30	287	314	1.2e-08
TRINITY_DN17202_c0_g1::TRINITY_DN17202_c0_g1_i1::g.38536::m.38536	PF00023.30	36	44	1.1e-08
TRINITY_DN17202_c0_g1::TRINITY_DN17202_c0_g1_i1::g.38536::m.38536	PF00023.30	251	282	1.1e-08
TRINITY_DN17202_c0_g1::TRINITY_DN17202_c0_g1_i1::g.38536::m.38536	PF00023.30	284	311	1.1e-08
TRINITY_DN17096_c0_g1::TRINITY_DN17096_c0_g1_i1::g.37342::m.37342	PF00023.30	23	62	7.5e-13
TRINITY_DN17096_c0_g1::TRINITY_DN17096_c0_g1_i1::g.37342::m.37342	PF00023.30	66	96	7.5e-13
TRINITY_DN16935_c0_g1::TRINITY_DN16935_c0_g1_i2::g.37221::m.37221	PF00023.30	127	157	2.1e-10
TRINITY_DN16935_c0_g1::TRINITY_DN16935_c0_g1_i2::g.37221::m.37221	PF00023.30	162	184	2.1e-10
TRINITY_DN16935_c0_g1::TRINITY_DN16935_c0_g1_i1::g.37218::m.37218	PF00023.30	127	157	2.1e-10
TRINITY_DN16935_c0_g1::TRINITY_DN16935_c0_g1_i1::g.37218::m.37218	PF00023.30	162	184	2.1e-10
TRINITY_DN16709_c0_g1::TRINITY_DN16709_c0_g1_i1::g.36457::m.36457	PF00023.30	5	17	4.7e-05
TRINITY_DN16709_c0_g1::TRINITY_DN16709_c0_g1_i1::g.36457::m.36457	PF00023.30	55	61	4.7e-05
TRINITY_DN16709_c0_g1::TRINITY_DN16709_c0_g1_i1::g.36457::m.36457	PF00023.30	72	89	4.7e-05
TRINITY_DN16709_c0_g1::TRINITY_DN16709_c0_g1_i1::g.36457::m.36457	PF00023.30	195	212	4.7e-05
TRINITY_DN16709_c0_g1::TRINITY_DN16709_c0_g1_i1::g.36457::m.36457	PF00023.30	231	239	4.7e-05
TRINITY_DN16640_c0_g1::TRINITY_DN16640_c0_g1_i1::g.35901::m.35901	PF00023.30	11	42	5.6e-36
TRINITY_DN16640_c0_g1::TRINITY_DN16640_c0_g1_i1::g.35901::m.35901	PF00023.30	45	65	5.6e-36
TRINITY_DN16640_c0_g1::TRINITY_DN16640_c0_g1_i1::g.35901::m.35901	PF00023.30	117	141	5.6e-36
TRINITY_DN16640_c0_g1::TRINITY_DN16640_c0_g1_i1::g.35901::m.35901	PF00023.30	144	175	5.6e-36
TRINITY_DN16640_c0_g1::TRINITY_DN16640_c0_g1_i1::g.35901::m.35901	PF00023.30	177	205	5.6e-36
TRINITY_DN16640_c0_g1::TRINITY_DN16640_c0_g1_i1::g.35901::m.35901	PF00023.30	218	237	5.6e-36
TRINITY_DN16640_c0_g1::TRINITY_DN16640_c0_g1_i1::g.35901::m.35901	PF00023.30	242	270	5.6e-36
TRINITY_DN16640_c0_g1::TRINITY_DN16640_c0_g1_i1::g.35901::m.35901	PF00023.30	276	304	5.6e-36
TRINITY_DN16640_c0_g1::TRINITY_DN16640_c0_g1_i1::g.35901::m.35901	PF00023.30	309	337	5.6e-36
TRINITY_DN16640_c0_g1::TRINITY_DN16640_c0_g1_i1::g.35901::m.35901	PF00023.30	342	373	5.6e-36
TRINITY_DN16640_c0_g1::TRINITY_DN16640_c0_g1_i1::g.35901::m.35901	PF00023.30	439	459	5.6e-36
TRINITY_DN16639_c0_g1::TRINITY_DN16639_c0_g1_i1::g.35657::m.35657	PF00023.30	28	59	0.00015
TRINITY_DN16505_c0_g1::TRINITY_DN16505_c0_g1_i1::g.35417::m.35417	PF00023.30	51	80	8.5e-13
TRINITY_DN16505_c0_g1::TRINITY_DN16505_c0_g1_i1::g.35417::m.35417	PF00023.30	84	114	8.5e-13
TRINITY_DN16505_c0_g1::TRINITY_DN16505_c0_g1_i1::g.35417::m.35417	PF00023.30	416	425	8.5e-13
TRINITY_DN16392_c0_g1::TRINITY_DN16392_c0_g1_i2::g.34793::m.34793	PF00023.30	7	31	7.6e-20
TRINITY_DN16392_c0_g1::TRINITY_DN16392_c0_g1_i2::g.34793::m.34793	PF00023.30	38	68	7.6e-20
TRINITY_DN16392_c0_g1::TRINITY_DN16392_c0_g1_i2::g.34793::m.34793	PF00023.30	70	101	7.6e-20
TRINITY_DN16392_c0_g1::TRINITY_DN16392_c0_g1_i2::g.34793::m.34793	PF00023.30	103	128	7.6e-20
TRINITY_DN16392_c0_g1::TRINITY_DN16392_c0_g1_i2::g.34793::m.34793	PF00023.30	136	154	7.6e-20
TRINITY_DN16349_c0_g1::TRINITY_DN16349_c0_g1_i1::g.34612::m.34612	PF00023.30	27	48	7.3e-07
TRINITY_DN16349_c0_g1::TRINITY_DN16349_c0_g1_i1::g.34612::m.34612	PF00023.30	67	92	7.3e-07
TRINITY_DN16349_c0_g1::TRINITY_DN16349_c0_g1_i1::g.34612::m.34612	PF00023.30	103	135	7.3e-07
TRINITY_DN16318_c0_g1::TRINITY_DN16318_c0_g1_i1::g.34595::m.34595	PF00023.30	151	159	1.5e-11
TRINITY_DN16318_c0_g1::TRINITY_DN16318_c0_g1_i1::g.34595::m.34595	PF00023.30	214	227	1.5e-11
TRINITY_DN16318_c0_g1::TRINITY_DN16318_c0_g1_i1::g.34595::m.34595	PF00023.30	236	261	1.5e-11
TRINITY_DN16318_c0_g1::TRINITY_DN16318_c0_g1_i1::g.34595::m.34595	PF00023.30	270	295	1.5e-11
TRINITY_DN16318_c0_g1::TRINITY_DN16318_c0_g1_i1::g.34595::m.34595	PF00023.30	587	592	1.5e-11
TRINITY_DN16244_c0_g1::TRINITY_DN16244_c0_g1_i1::g.34102::m.34102	PF00023.30	36	67	1.5e-08
TRINITY_DN16244_c0_g1::TRINITY_DN16244_c0_g1_i1::g.34102::m.34102	PF00023.30	70	77	1.5e-08
TRINITY_DN15985_c0_g1::TRINITY_DN15985_c0_g1_i1::g.32824::m.32824	PF00023.30	157	180	3.4e-06
TRINITY_DN15985_c0_g1::TRINITY_DN15985_c0_g1_i1::g.32824::m.32824	PF00023.30	200	213	3.4e-06
TRINITY_DN15985_c0_g1::TRINITY_DN15985_c0_g1_i1::g.32824::m.32824	PF00023.30	391	401	3.4e-06
TRINITY_DN15915_c0_g1::TRINITY_DN15915_c0_g1_i1::g.32865::m.32865	PF00023.30	69	84	1.2e-25
TRINITY_DN15915_c0_g1::TRINITY_DN15915_c0_g1_i1::g.32865::m.32865	PF00023.30	96	127	1.2e-25
TRINITY_DN15915_c0_g1::TRINITY_DN15915_c0_g1_i1::g.32865::m.32865	PF00023.30	131	160	1.2e-25
TRINITY_DN15915_c0_g1::TRINITY_DN15915_c0_g1_i1::g.32865::m.32865	PF00023.30	166	195	1.2e-25
TRINITY_DN15915_c0_g1::TRINITY_DN15915_c0_g1_i1::g.32865::m.32865	PF00023.30	200	232	1.2e-25
TRINITY_DN15915_c0_g1::TRINITY_DN15915_c0_g1_i1::g.32865::m.32865	PF00023.30	234	257	1.2e-25
TRINITY_DN15821_c0_g1::TRINITY_DN15821_c0_g1_i1::g.32465::m.32465	PF00023.30	12	42	6.3e-12
TRINITY_DN15821_c0_g1::TRINITY_DN15821_c0_g1_i1::g.32465::m.32465	PF00023.30	47	76	6.3e-12
TRINITY_DN15821_c0_g1::TRINITY_DN15821_c0_g1_i1::g.32465::m.32465	PF00023.30	121	129	6.3e-12
TRINITY_DN15821_c0_g1::TRINITY_DN15821_c0_g1_i1::g.32465::m.32465	PF00023.30	159	189	6.3e-12
TRINITY_DN15821_c0_g1::TRINITY_DN15821_c0_g1_i1::g.32465::m.32465	PF00023.30	193	200	6.3e-12
TRINITY_DN15745_c0_g1::TRINITY_DN15745_c0_g1_i2::g.32349::m.32349	PF00023.30	1	8	1.2e-15
TRINITY_DN15745_c0_g1::TRINITY_DN15745_c0_g1_i2::g.32349::m.32349	PF00023.30	11	41	1.2e-15
TRINITY_DN15745_c0_g1::TRINITY_DN15745_c0_g1_i2::g.32349::m.32349	PF00023.30	44	75	1.2e-15
TRINITY_DN15745_c0_g1::TRINITY_DN15745_c0_g1_i2::g.32349::m.32349	PF00023.30	77	97	1.2e-15
TRINITY_DN15742_c0_g1::TRINITY_DN15742_c0_g1_i1::g.32290::m.32290	PF00023.30	56	71	2.4e-17
TRINITY_DN15742_c0_g1::TRINITY_DN15742_c0_g1_i1::g.32290::m.32290	PF00023.30	90	111	2.4e-17
TRINITY_DN15742_c0_g1::TRINITY_DN15742_c0_g1_i1::g.32290::m.32290	PF00023.30	129	146	2.4e-17
TRINITY_DN15742_c0_g1::TRINITY_DN15742_c0_g1_i1::g.32290::m.32290	PF00023.30	204	234	2.4e-17
TRINITY_DN15742_c0_g1::TRINITY_DN15742_c0_g1_i1::g.32290::m.32290	PF00023.30	236	268	2.4e-17
TRINITY_DN1558_c0_g1::TRINITY_DN1558_c0_g1_i1::g.1920::m.1920	PF00023.30	11	34	5.7e-24
TRINITY_DN1558_c0_g1::TRINITY_DN1558_c0_g1_i1::g.1920::m.1920	PF00023.30	41	57	5.7e-24
TRINITY_DN1558_c0_g1::TRINITY_DN1558_c0_g1_i1::g.1920::m.1920	PF00023.30	66	92	5.7e-24
TRINITY_DN1558_c0_g1::TRINITY_DN1558_c0_g1_i1::g.1920::m.1920	PF00023.30	105	124	5.7e-24
TRINITY_DN1558_c0_g1::TRINITY_DN1558_c0_g1_i1::g.1920::m.1920	PF00023.30	136	158	5.7e-24
TRINITY_DN1558_c0_g1::TRINITY_DN1558_c0_g1_i1::g.1920::m.1920	PF00023.30	161	182	5.7e-24
TRINITY_DN1558_c0_g1::TRINITY_DN1558_c0_g1_i1::g.1920::m.1920	PF00023.30	220	220	5.7e-24
TRINITY_DN1558_c0_g1::TRINITY_DN1558_c0_g1_i1::g.1920::m.1920	PF00023.30	257	283	5.7e-24
TRINITY_DN1558_c0_g1::TRINITY_DN1558_c0_g1_i1::g.1920::m.1920	PF00023.30	289	314	5.7e-24
TRINITY_DN1558_c0_g1::TRINITY_DN1558_c0_g1_i1::g.1920::m.1920	PF00023.30	320	345	5.7e-24
TRINITY_DN1558_c0_g1::TRINITY_DN1558_c0_g1_i1::g.1920::m.1920	PF00023.30	351	370	5.7e-24
TRINITY_DN1558_c0_g1::TRINITY_DN1558_c0_g1_i1::g.1920::m.1920	PF00023.30	382	401	5.7e-24
TRINITY_DN1558_c0_g1::TRINITY_DN1558_c0_g1_i1::g.1920::m.1920	PF00023.30	418	433	5.7e-24
TRINITY_DN15568_c0_g1::TRINITY_DN15568_c0_g1_i1::g.31469::m.31469	PF00023.30	97	127	2.3e-21
TRINITY_DN15568_c0_g1::TRINITY_DN15568_c0_g1_i1::g.31469::m.31469	PF00023.30	134	158	2.3e-21
TRINITY_DN15568_c0_g1::TRINITY_DN15568_c0_g1_i1::g.31469::m.31469	PF00023.30	161	181	2.3e-21
TRINITY_DN15568_c0_g1::TRINITY_DN15568_c0_g1_i1::g.31469::m.31469	PF00023.30	195	224	2.3e-21
TRINITY_DN15568_c0_g1::TRINITY_DN15568_c0_g1_i1::g.31469::m.31469	PF00023.30	227	279	2.3e-21
TRINITY_DN15568_c0_g1::TRINITY_DN15568_c0_g1_i1::g.31469::m.31469	PF00023.30	290	300	2.3e-21
TRINITY_DN15518_c1_g1::TRINITY_DN15518_c1_g1_i1::g.31428::m.31428	PF00023.30	1	11	1.3e-07
TRINITY_DN15518_c1_g1::TRINITY_DN15518_c1_g1_i1::g.31428::m.31428	PF00023.30	15	41	1.3e-07
TRINITY_DN15518_c1_g1::TRINITY_DN15518_c1_g1_i1::g.31428::m.31428	PF00023.30	47	82	1.3e-07
TRINITY_DN15502_c0_g1::TRINITY_DN15502_c0_g1_i1::g.31512::m.31512	PF00023.30	153	179	0.00062
TRINITY_DN15502_c0_g1::TRINITY_DN15502_c0_g1_i1::g.31512::m.31512	PF00023.30	196	201	0.00062
TRINITY_DN15502_c0_g1::TRINITY_DN15502_c0_g1_i1::g.31512::m.31512	PF00023.30	244	250	0.00062
TRINITY_DN15502_c0_g1::TRINITY_DN15502_c0_g1_i1::g.31512::m.31512	PF00023.30	289	304	0.00062
TRINITY_DN15502_c0_g1::TRINITY_DN15502_c0_g1_i1::g.31512::m.31512	PF00023.30	336	354	0.00062
TRINITY_DN15502_c0_g1::TRINITY_DN15502_c0_g1_i1::g.31512::m.31512	PF00023.30	371	409	0.00062
TRINITY_DN15264_c0_g1::TRINITY_DN15264_c0_g1_i1::g.30535::m.30535	PF00023.30	72	97	6.2e-22
TRINITY_DN15264_c0_g1::TRINITY_DN15264_c0_g1_i1::g.30535::m.30535	PF00023.30	105	133	6.2e-22
TRINITY_DN15264_c0_g1::TRINITY_DN15264_c0_g1_i1::g.30535::m.30535	PF00023.30	139	170	6.2e-22
TRINITY_DN15264_c0_g1::TRINITY_DN15264_c0_g1_i1::g.30535::m.30535	PF00023.30	175	206	6.2e-22
TRINITY_DN15115_c0_g1::TRINITY_DN15115_c0_g1_i1::g.29984::m.29984	PF00023.30	6	36	8.6e-07
TRINITY_DN15105_c0_g1::TRINITY_DN15105_c0_g1_i1::g.29939::m.29939	PF00023.30	266	287	1.1e-14
TRINITY_DN15105_c0_g1::TRINITY_DN15105_c0_g1_i1::g.29939::m.29939	PF00023.30	294	323	1.1e-14
TRINITY_DN15105_c0_g1::TRINITY_DN15105_c0_g1_i1::g.29939::m.29939	PF00023.30	328	363	1.1e-14
TRINITY_DN15105_c0_g1::TRINITY_DN15105_c0_g1_i1::g.29939::m.29939	PF00023.30	366	380	1.1e-14
TRINITY_DN15105_c0_g1::TRINITY_DN15105_c0_g1_i1::g.29939::m.29939	PF00023.30	405	410	1.1e-14
TRINITY_DN14955_c0_g1::TRINITY_DN14955_c0_g1_i1::g.29176::m.29176	PF00023.30	26	42	1.6e-41
TRINITY_DN14955_c0_g1::TRINITY_DN14955_c0_g1_i1::g.29176::m.29176	PF00023.30	54	83	1.6e-41
TRINITY_DN14955_c0_g1::TRINITY_DN14955_c0_g1_i1::g.29176::m.29176	PF00023.30	87	111	1.6e-41
TRINITY_DN14955_c0_g1::TRINITY_DN14955_c0_g1_i1::g.29176::m.29176	PF00023.30	121	152	1.6e-41
TRINITY_DN14955_c0_g1::TRINITY_DN14955_c0_g1_i1::g.29176::m.29176	PF00023.30	159	186	1.6e-41
TRINITY_DN14955_c0_g1::TRINITY_DN14955_c0_g1_i1::g.29176::m.29176	PF00023.30	189	219	1.6e-41
TRINITY_DN14955_c0_g1::TRINITY_DN14955_c0_g1_i1::g.29176::m.29176	PF00023.30	224	255	1.6e-41
TRINITY_DN14955_c0_g1::TRINITY_DN14955_c0_g1_i1::g.29176::m.29176	PF00023.30	257	284	1.6e-41
TRINITY_DN14955_c0_g1::TRINITY_DN14955_c0_g1_i1::g.29176::m.29176	PF00023.30	305	326	1.6e-41
TRINITY_DN14955_c0_g1::TRINITY_DN14955_c0_g1_i1::g.29176::m.29176	PF00023.30	330	356	1.6e-41
TRINITY_DN14955_c0_g1::TRINITY_DN14955_c0_g1_i1::g.29176::m.29176	PF00023.30	361	395	1.6e-41
TRINITY_DN14955_c0_g1::TRINITY_DN14955_c0_g1_i1::g.29176::m.29176	PF00023.30	397	408	1.6e-41
TRINITY_DN14863_c0_g1::TRINITY_DN14863_c0_g1_i3::g.28729::m.28729	PF00023.30	3	16	0.0001
TRINITY_DN14863_c0_g1::TRINITY_DN14863_c0_g1_i3::g.28729::m.28729	PF00023.30	25	51	0.0001
TRINITY_DN14863_c0_g1::TRINITY_DN14863_c0_g1_i2::g.28728::m.28728	PF00023.30	3	16	0.00014
TRINITY_DN14863_c0_g1::TRINITY_DN14863_c0_g1_i2::g.28728::m.28728	PF00023.30	25	51	0.00014
TRINITY_DN14863_c0_g1::TRINITY_DN14863_c0_g1_i1::g.28727::m.28727	PF00023.30	3	16	0.00013
TRINITY_DN14863_c0_g1::TRINITY_DN14863_c0_g1_i1::g.28727::m.28727	PF00023.30	25	51	0.00013
TRINITY_DN14773_c1_g1::TRINITY_DN14773_c1_g1_i1::g.28598::m.28598	PF00023.30	18	24	6.2e-19
TRINITY_DN14773_c1_g1::TRINITY_DN14773_c1_g1_i1::g.28598::m.28598	PF00023.30	60	68	6.2e-19
TRINITY_DN14773_c1_g1::TRINITY_DN14773_c1_g1_i1::g.28598::m.28598	PF00023.30	159	181	6.2e-19
TRINITY_DN14773_c1_g1::TRINITY_DN14773_c1_g1_i1::g.28598::m.28598	PF00023.30	197	227	6.2e-19
TRINITY_DN14773_c1_g1::TRINITY_DN14773_c1_g1_i1::g.28598::m.28598	PF00023.30	229	255	6.2e-19
TRINITY_DN14773_c1_g1::TRINITY_DN14773_c1_g1_i1::g.28598::m.28598	PF00023.30	272	299	6.2e-19
TRINITY_DN14773_c1_g1::TRINITY_DN14773_c1_g1_i1::g.28598::m.28598	PF00023.30	306	327	6.2e-19
TRINITY_DN14657_c0_g1::TRINITY_DN14657_c0_g1_i1::g.28019::m.28019	PF00023.30	60	70	4e-13
TRINITY_DN14657_c0_g1::TRINITY_DN14657_c0_g1_i1::g.28019::m.28019	PF00023.30	74	103	4e-13
TRINITY_DN14657_c0_g1::TRINITY_DN14657_c0_g1_i1::g.28019::m.28019	PF00023.30	137	147	4e-13
TRINITY_DN14657_c0_g1::TRINITY_DN14657_c0_g1_i1::g.28019::m.28019	PF00023.30	169	200	4e-13
TRINITY_DN14657_c0_g1::TRINITY_DN14657_c0_g1_i1::g.28019::m.28019	PF00023.30	203	211	4e-13
TRINITY_DN14547_c0_g1::TRINITY_DN14547_c0_g1_i1::g.27736::m.27736	PF00023.30	75	99	2e-14
TRINITY_DN14547_c0_g1::TRINITY_DN14547_c0_g1_i1::g.27736::m.27736	PF00023.30	106	132	2e-14
TRINITY_DN14547_c0_g1::TRINITY_DN14547_c0_g1_i1::g.27736::m.27736	PF00023.30	137	165	2e-14
TRINITY_DN14547_c0_g1::TRINITY_DN14547_c0_g1_i1::g.27736::m.27736	PF00023.30	173	194	2e-14
TRINITY_DN14547_c0_g1::TRINITY_DN14547_c0_g1_i1::g.27736::m.27736	PF00023.30	197	223	2e-14
TRINITY_DN14514_c0_g1::TRINITY_DN14514_c0_g1_i1::g.27661::m.27661	PF00023.30	15	28	2.8e-10
TRINITY_DN14514_c0_g1::TRINITY_DN14514_c0_g1_i1::g.27661::m.27661	PF00023.30	35	57	2.8e-10
TRINITY_DN14514_c0_g1::TRINITY_DN14514_c0_g1_i1::g.27661::m.27661	PF00023.30	72	102	2.8e-10
TRINITY_DN14514_c0_g1::TRINITY_DN14514_c0_g1_i1::g.27661::m.27661	PF00023.30	115	135	2.8e-10
TRINITY_DN14333_c0_g1::TRINITY_DN14333_c0_g1_i1::g.27248::m.27248	PF00023.30	5	28	5.6e-12
TRINITY_DN14333_c0_g1::TRINITY_DN14333_c0_g1_i1::g.27248::m.27248	PF00023.30	36	61	5.6e-12
TRINITY_DN14333_c0_g1::TRINITY_DN14333_c0_g1_i1::g.27248::m.27248	PF00023.30	67	92	5.6e-12
TRINITY_DN14333_c0_g1::TRINITY_DN14333_c0_g1_i1::g.27248::m.27248	PF00023.30	96	115	5.6e-12
TRINITY_DN14333_c0_g1::TRINITY_DN14333_c0_g1_i1::g.27248::m.27248	PF00023.30	133	153	5.6e-12
TRINITY_DN14333_c0_g1::TRINITY_DN14333_c0_g1_i1::g.27248::m.27248	PF00023.30	159	176	5.6e-12
TRINITY_DN14306_c0_g2::TRINITY_DN14306_c0_g2_i1::g.27094::m.27094	PF00023.30	66	90	2.8e-09
TRINITY_DN14306_c0_g2::TRINITY_DN14306_c0_g2_i1::g.27094::m.27094	PF00023.30	103	126	2.8e-09
TRINITY_DN14306_c0_g2::TRINITY_DN14306_c0_g2_i1::g.27094::m.27094	PF00023.30	137	151	2.8e-09
TRINITY_DN14306_c0_g1::TRINITY_DN14306_c0_g1_i2::g.27092::m.27092	PF00023.30	19	39	6e-15
TRINITY_DN14306_c0_g1::TRINITY_DN14306_c0_g1_i2::g.27092::m.27092	PF00023.30	50	77	6e-15
TRINITY_DN14306_c0_g1::TRINITY_DN14306_c0_g1_i2::g.27092::m.27092	PF00023.30	87	112	6e-15
TRINITY_DN14306_c0_g1::TRINITY_DN14306_c0_g1_i2::g.27092::m.27092	PF00023.30	109	136	6e-15
TRINITY_DN14306_c0_g1::TRINITY_DN14306_c0_g1_i1::g.27091::m.27091	PF00023.30	48	75	7.6e-15
TRINITY_DN14306_c0_g1::TRINITY_DN14306_c0_g1_i1::g.27091::m.27091	PF00023.30	87	110	7.6e-15
TRINITY_DN14306_c0_g1::TRINITY_DN14306_c0_g1_i1::g.27091::m.27091	PF00023.30	110	136	7.6e-15
TRINITY_DN14077_c0_g1::TRINITY_DN14077_c0_g1_i1::g.26231::m.26231	PF00023.30	8	36	8e-39
TRINITY_DN14077_c0_g1::TRINITY_DN14077_c0_g1_i1::g.26231::m.26231	PF00023.30	41	68	8e-39
TRINITY_DN14077_c0_g1::TRINITY_DN14077_c0_g1_i1::g.26231::m.26231	PF00023.30	75	101	8e-39
TRINITY_DN14077_c0_g1::TRINITY_DN14077_c0_g1_i1::g.26231::m.26231	PF00023.30	108	135	8e-39
TRINITY_DN14077_c0_g1::TRINITY_DN14077_c0_g1_i1::g.26231::m.26231	PF00023.30	142	168	8e-39
TRINITY_DN14077_c0_g1::TRINITY_DN14077_c0_g1_i1::g.26231::m.26231	PF00023.30	175	203	8e-39
TRINITY_DN14077_c0_g1::TRINITY_DN14077_c0_g1_i1::g.26231::m.26231	PF00023.30	206	233	8e-39
TRINITY_DN14009_c0_g1::TRINITY_DN14009_c0_g1_i1::g.26007::m.26007	PF00023.30	139	164	7.5e-12
TRINITY_DN14009_c0_g1::TRINITY_DN14009_c0_g1_i1::g.26007::m.26007	PF00023.30	166	197	7.5e-12
TRINITY_DN14009_c0_g1::TRINITY_DN14009_c0_g1_i1::g.26007::m.26007	PF00023.30	202	226	7.5e-12
TRINITY_DN13805_c0_g1::TRINITY_DN13805_c0_g1_i1::g.25452::m.25452	PF00023.30	58	75	0.00021
TRINITY_DN13805_c0_g1::TRINITY_DN13805_c0_g1_i1::g.25452::m.25452	PF00023.30	83	110	0.00021
TRINITY_DN13805_c0_g1::TRINITY_DN13805_c0_g1_i1::g.25452::m.25452	PF00023.30	218	243	0.00021
TRINITY_DN13805_c0_g1::TRINITY_DN13805_c0_g1_i1::g.25452::m.25452	PF00023.30	255	276	0.00021
TRINITY_DN13805_c0_g1::TRINITY_DN13805_c0_g1_i1::g.25452::m.25452	PF00023.30	339	354	0.00021
TRINITY_DN13607_c0_g1::TRINITY_DN13607_c0_g1_i1::g.24768::m.24768	PF00023.30	31	41	2e-12
TRINITY_DN13607_c0_g1::TRINITY_DN13607_c0_g1_i1::g.24768::m.24768	PF00023.30	45	73	2e-12
TRINITY_DN13607_c0_g1::TRINITY_DN13607_c0_g1_i1::g.24768::m.24768	PF00023.30	78	101	2e-12
TRINITY_DN13607_c0_g1::TRINITY_DN13607_c0_g1_i1::g.24768::m.24768	PF00023.30	110	141	2e-12
TRINITY_DN13546_c0_g1::TRINITY_DN13546_c0_g1_i2::g.24608::m.24608	PF00023.30	34	67	2.2e-16
TRINITY_DN13546_c0_g1::TRINITY_DN13546_c0_g1_i2::g.24608::m.24608	PF00023.30	70	80	2.2e-16
TRINITY_DN13546_c0_g1::TRINITY_DN13546_c0_g1_i2::g.24608::m.24608	PF00023.30	104	130	2.2e-16
TRINITY_DN13546_c0_g1::TRINITY_DN13546_c0_g1_i2::g.24608::m.24608	PF00023.30	138	147	2.2e-16
TRINITY_DN13546_c0_g1::TRINITY_DN13546_c0_g1_i1::g.24605::m.24605	PF00023.30	34	67	2.2e-16
TRINITY_DN13546_c0_g1::TRINITY_DN13546_c0_g1_i1::g.24605::m.24605	PF00023.30	70	80	2.2e-16
TRINITY_DN13546_c0_g1::TRINITY_DN13546_c0_g1_i1::g.24605::m.24605	PF00023.30	104	130	2.2e-16
TRINITY_DN13546_c0_g1::TRINITY_DN13546_c0_g1_i1::g.24605::m.24605	PF00023.30	138	147	2.2e-16
TRINITY_DN13445_c0_g1::TRINITY_DN13445_c0_g1_i1::g.24282::m.24282	PF00023.30	8	28	2.6e-11
TRINITY_DN13445_c0_g1::TRINITY_DN13445_c0_g1_i1::g.24282::m.24282	PF00023.30	34	58	2.6e-11
TRINITY_DN13445_c0_g1::TRINITY_DN13445_c0_g1_i1::g.24282::m.24282	PF00023.30	101	123	2.6e-11
TRINITY_DN13445_c0_g1::TRINITY_DN13445_c0_g1_i1::g.24282::m.24282	PF00023.30	163	184	2.6e-11
TRINITY_DN13445_c0_g1::TRINITY_DN13445_c0_g1_i1::g.24282::m.24282	PF00023.30	200	211	2.6e-11
TRINITY_DN13445_c0_g1::TRINITY_DN13445_c0_g1_i1::g.24282::m.24282	PF00023.30	230	248	2.6e-11
TRINITY_DN13445_c0_g1::TRINITY_DN13445_c0_g1_i1::g.24282::m.24282	PF00023.30	289	315	2.6e-11
TRINITY_DN13445_c0_g1::TRINITY_DN13445_c0_g1_i1::g.24282::m.24282	PF00023.30	317	336	2.6e-11
TRINITY_DN13445_c0_g1::TRINITY_DN13445_c0_g1_i1::g.24282::m.24282	PF00023.30	377	403	2.6e-11
TRINITY_DN13445_c0_g1::TRINITY_DN13445_c0_g1_i1::g.24282::m.24282	PF00023.30	468	495	2.6e-11
TRINITY_DN13445_c0_g1::TRINITY_DN13445_c0_g1_i1::g.24282::m.24282	PF00023.30	606	625	2.6e-11
TRINITY_DN13445_c0_g1::TRINITY_DN13445_c0_g1_i1::g.24281::m.24281	PF00023.30	6	22	4.2e-12
TRINITY_DN13445_c0_g1::TRINITY_DN13445_c0_g1_i1::g.24281::m.24281	PF00023.30	244	266	4.2e-12
TRINITY_DN13445_c0_g1::TRINITY_DN13445_c0_g1_i1::g.24281::m.24281	PF00023.30	336	362	4.2e-12
TRINITY_DN13445_c0_g1::TRINITY_DN13445_c0_g1_i1::g.24281::m.24281	PF00023.30	432	449	4.2e-12
TRINITY_DN13445_c0_g1::TRINITY_DN13445_c0_g1_i1::g.24281::m.24281	PF00023.30	461	485	4.2e-12
TRINITY_DN13445_c0_g1::TRINITY_DN13445_c0_g1_i1::g.24281::m.24281	PF00023.30	491	517	4.2e-12
TRINITY_DN13445_c0_g1::TRINITY_DN13445_c0_g1_i1::g.24281::m.24281	PF00023.30	550	567	4.2e-12
TRINITY_DN13399_c0_g1::TRINITY_DN13399_c0_g1_i1::g.23976::m.23976	PF00023.30	132	155	3e-23
TRINITY_DN13399_c0_g1::TRINITY_DN13399_c0_g1_i1::g.23976::m.23976	PF00023.30	209	230	3e-23
TRINITY_DN13399_c0_g1::TRINITY_DN13399_c0_g1_i1::g.23976::m.23976	PF00023.30	441	469	3e-23
TRINITY_DN13399_c0_g1::TRINITY_DN13399_c0_g1_i1::g.23976::m.23976	PF00023.30	479	503	3e-23
TRINITY_DN13399_c0_g1::TRINITY_DN13399_c0_g1_i1::g.23976::m.23976	PF00023.30	514	531	3e-23
TRINITY_DN13399_c0_g1::TRINITY_DN13399_c0_g1_i1::g.23976::m.23976	PF00023.30	569	595	3e-23
TRINITY_DN13399_c0_g1::TRINITY_DN13399_c0_g1_i1::g.23976::m.23976	PF00023.30	601	630	3e-23
TRINITY_DN13399_c0_g1::TRINITY_DN13399_c0_g1_i1::g.23976::m.23976	PF00023.30	649	665	3e-23
TRINITY_DN13379_c0_g1::TRINITY_DN13379_c0_g1_i1::g.24020::m.24020	PF00023.30	44	58	5.2e-05
TRINITY_DN13379_c0_g1::TRINITY_DN13379_c0_g1_i1::g.24020::m.24020	PF00023.30	79	103	5.2e-05
TRINITY_DN13379_c0_g1::TRINITY_DN13379_c0_g1_i1::g.24020::m.24020	PF00023.30	115	136	5.2e-05
TRINITY_DN13049_c0_g1::TRINITY_DN13049_c0_g1_i1::g.23081::m.23081	PF00023.30	55	66	1.8e-07
TRINITY_DN13049_c0_g1::TRINITY_DN13049_c0_g1_i1::g.23081::m.23081	PF00023.30	222	244	1.8e-07
TRINITY_DN13049_c0_g1::TRINITY_DN13049_c0_g1_i1::g.23081::m.23081	PF00023.30	249	278	1.8e-07
[truncated: 80,744 more rows]

## Sheet: Pfam_all_species
Pfam domain ID	Pfam domain name	T. aureum ssp. strugatski	Aplanochytrium kerguelense PBS07 v1.0	Hondaea fermentalgiana GCA_002897355.1	Aurantiochytrium limacinum ATCC MYA-1381	Schizochytrium aggregatum ATCC 28209
PF10417	1-cysPrx_C	3	3	2	2	2
PF00244	14-3-3	7	4	10	6	5
PF00389	2-Hacid_dh	2	4	2	2	2
PF02826	2-Hacid_dh_C	9	19	14	12	8
PF00198	2-oxoacid_dh	8	4	4	4	4
PF16078	2-oxogl_dehyd_N	1	1	1	1	1
PF01257	2Fe-2S_thioredx	1	1	1	1	1
PF03171	2OG-FeII_Oxy	6	15	9	9	11
PF13532	2OG-FeII_Oxy_2	9	7	7	6	8
PF13640	2OG-FeII_Oxy_3	29	21	19	19	18
PF13661	2OG-FeII_Oxy_4	8	6	4	6	3
PF13563	2_5_RNA_ligase2	4	3	2	1	1
PF06052	3-HAO	1	1	1	1	1
PF01073	3Beta_HSD	29	33	29	36	19
PF00725	3HCDH	5	4	4	4	4
PF02737	3HCDH_N	11	13	12	8	9
PF16121	40S_S4_C	4	1	1	1	1
PF03061	4HBT	10	5	9	11	6
PF13279	4HBT_2	7	4	5	4	1
PF13622	4HBT_3	6	4	4	4	4
PF12729	4HB_MCP_1	0	0	0	0	1
PF01812	5-FTHF_cyc-lig	1	1	1	1	1
PF09038	53-BP1_Tudor	3	1	5	8	4
PF01367	5_3_exonuc	1	2	2	1	2
PF02739	5_3_exonuc_N	0	0	1	1	1
PF05761	5_nucleotid	1	1	2	2	3
PF02872	5_nucleotid_C	4	3	3	3	3
PF02096	60KD_IMP	3	2	2	2	2
PF01591	6PF2K	5	3	3	3	5
PF00393	6PGD	2	1	1	1	1
PF00001	7tm_1	1	2	2	3	5
PF00002	7tm_2	6	1	2	2	2
PF00003	7tm_3	50	19	30	37	33
PF02175	7TM_GPCR_Srb	0	0	0	0	1
PF10323	7TM_GPCR_Srv	0	0	0	0	1
PF00207	A2M	1	1	0	0	1
PF07677	A2M_recep	0	1	0	1	1
PF00004	AAA	90	86	82	88	86
PF13086	AAA_11	18	9	16	13	14
PF13087	AAA_12	15	6	9	9	7
PF13173	AAA_14	21	32	25	20	20
PF13175	AAA_15	16	24	10	17	23
PF13191	AAA_16	132	123	142	146	128
PF13207	AAA_17	15	15	15	13	13
PF13238	AAA_18	35	55	52	65	54
PF13245	AAA_19	18	15	32	21	19
PF07724	AAA_2	22	32	27	32	27
PF13304	AAA_21	58	82	49	49	63
PF13401	AAA_22	75	111	122	129	111
PF13476	AAA_23	27	38	19	21	29
PF13479	AAA_24	6	30	15	17	16
PF13481	AAA_25	15	28	29	36	23
PF13500	AAA_26	6	5	5	5	4
PF13514	AAA_27	0	3	0	1	2
PF13521	AAA_28	14	18	24	20	20
PF13555	AAA_29	35	62	45	44	47
PF07726	AAA_3	6	16	10	11	9
PF13604	AAA_30	26	27	40	37	32
PF13614	AAA_31	5	5	6	6	6
PF13671	AAA_33	30	46	48	50	44
PF13872	AAA_34	1	1	1	1	2
PF07728	AAA_5	64	61	77	79	76
PF12774	AAA_6	17	2	21	21	20
PF12775	AAA_7	19	22	36	39	34
PF12780	AAA_8	13	2	19	19	19
PF12781	AAA_9	20	1	19	18	18
PF17857	AAA_lid_1	9	0	17	17	17
PF17872	AAA_lid_10	0	1	2	2	2
PF18198	AAA_lid_11	17	0	18	18	18
PF17863	AAA_lid_2	0	1	1	1	1
PF17862	AAA_lid_3	29	28	25	24	25
PF17865	AAA_lid_5	1	1	1	1	1
PF17867	AAA_lid_7	2	1	2	1	1
PF17871	AAA_lid_9	4	3	3	4	2
PF08298	AAA_PrkA	4	1	1	2	1
PF05282	AAR2	1	1	1	1	1
PF08142	AARP2CN	7	2	2	2	2
PF03417	AAT	1	2	0	0	1
PF07247	AATase	0	2	0	0	1
PF00696	AA_kinase	10	7	6	6	5
PF00324	AA_permease	16	11	11	10	9
PF13520	AA_permease_2	15	8	10	7	8
PF13906	AA_permease_C	2	1	1	1	1
PF01490	Aa_trans	33	15	20	25	14
PF12430	ABA_GPCR	1	1	1	1	1
PF03109	ABC1	14	9	10	10	11
PF01061	ABC2_membrane	29	21	28	31	14
PF12679	ABC2_membrane_2	1	1	1	1	4
PF12698	ABC2_membrane_3	25	20	18	20	18
PF09818	ABC_ATPase	2	6	2	4	6
PF00664	ABC_membrane	41	24	22	22	34
PF06472	ABC_membrane_2	5	8	5	4	1
PF00005	ABC_tran	122	116	97	100	97
PF09822	ABC_transp_aux	1	0	1	1	1
PF12848	ABC_tran_Xtn	4	5	4	4	4
PF00561	Abhydrolase_1	67	81	46	49	53
PF02230	Abhydrolase_2	10	16	7	6	5
PF07859	Abhydrolase_3	34	30	22	23	15
PF08386	Abhydrolase_4	0	4	5	2	3
PF12695	Abhydrolase_5	1	4	0	2	2
PF12697	Abhydrolase_6	66	78	49	47	52
PF04083	Abhydro_lipase	4	4	3	2	2
PF03992	ABM	6	5	2	2	2
PF16177	ACAS_N	1	2	2	2	1
PF13000	Acatn	1	1	1	1	1
PF00887	ACBP	11	10	5	5	5
PF08326	ACC_central	2	1	1	1	1
PF00583	Acetyltransf_1	38	31	24	30	24
PF13673	Acetyltransf_10	29	24	17	20	21
PF13720	Acetyltransf_11	1	1	1	1	1
PF13880	Acetyltransf_13	0	2	0	1	1
PF13302	Acetyltransf_3	7	3	4	7	5
PF13420	Acetyltransf_4	3	5	4	8	6
PF13508	Acetyltransf_7	27	25	19	22	19
PF13523	Acetyltransf_8	2	2	1	0	3
PF13527	Acetyltransf_9	9	7	4	6	8
PF14542	Acetyltransf_CG	2	4	0	0	3
PF12689	Acid_PPase	2	2	1	3	1
PF00330	Aconitase	2	2	2	2	2
PF06434	Aconitase_2_N	1	1	1	1	1
PF11791	Aconitase_B_N	1	1	1	1	1
PF00694	Aconitase_C	1	1	1	1	1
PF01756	ACOX	5	7	3	3	3
PF01648	ACPS	4	2	3	3	2
PF08545	ACP_syn_III	0	2	2	1	1
PF01842	ACT	6	4	3	2	2
PF09192	Act-Frag_cataly	2	2	2	1	1
PF00022	Actin	31	64	12	17	13
PF13710	ACT_5	2	2	1	1	1
PF13840	ACT_7	5	3	4	2	1
PF18859	acVLRF1	4	1	1	1	2
PF00441	Acyl-CoA_dh_1	24	23	23	19	16
PF08028	Acyl-CoA_dh_2	18	18	19	15	13
PF12806	Acyl-CoA_dh_C	2	1	2	2	2
PF02770	Acyl-CoA_dh_M	29	28	24	23	19
PF02771	Acyl-CoA_dh_N	22	18	19	18	14
PF14749	Acyl-CoA_ox_N	4	7	4	4	4
PF12418	AcylCoA_DH_N	1	1	1	2	2
PF00708	Acylphosphatase	1	0	1	2	1
PF01553	Acyltransferase	29	19	17	18	15
PF16076	Acyltransf_C	2	3	2	2	2
PF02551	Acyl_CoA_thio	4	2	2	2	2
PF00698	Acyl_transf_1	12	4	6	5	3
PF01757	Acyl_transf_3	4	3	1	0	3
PF09793	AD	3	1	1	1	1
PF17771	ADAM_CR_2	0	0	1	0	1
PF01602	Adaptin_N	18	17	22	20	20
PF00928	Adap_comp_sub	8	4	5	5	5
PF02456	Adeno_IVa2	0	0	0	1	1
PF03228	Adeno_VII	0	0	0	0	1
PF16579	AdenylateSensor	1	1	1	1	1
PF00709	Adenylsucc_synt	2	1	1	1	1
PF08240	ADH_N	21	34	28	31	21
PF16884	ADH_N_2	3	4	3	2	5
PF00106	adh_short	129	108	82	85	74
PF13561	adh_short_C2	122	99	76	77	67
PF00107	ADH_zinc_N	27	42	37	36	26
PF13602	ADH_zinc_N_2	25	33	26	31	21
PF11559	ADIP	2	0	2	0	1
PF00406	ADK	15	7	11	9	9
PF05191	ADK_lid	3	3	3	2	2
PF05221	AdoHcyase	1	1	1	1	1
PF00670	AdoHcyase_NAD	1	1	1	1	1
PF02675	AdoMet_dc	3	0	0	0	1
PF04587	ADP_PFK_GK	1	1	1	1	1
PF03747	ADP_ribosyl_GH	6	2	4	5	3
PF10397	ADSL_C	2	0	1	1	1
PF03969	AFG1_ATPase	5	3	2	2	3
PF05641	Agenet	9	4	9	10	6
PF09229	Aha1_N	2	2	2	1	1
PF00578	AhpC-TSA	14	20	13	11	11
PF13911	AhpC-TSA_2	2	2	1	0	1
PF01594	AI-2E_transport	3	2	3	2	2
PF01808	AICARFT_IMPCHas	2	1	1	1	1
PF14186	Aida_C2	1	0	2	1	1
PF08910	Aida_N	0	0	1	1	1
PF18158	AidB_N	2	1	1	1	1
PF14721	AIF_C	1	1	1	1	1
PF04548	AIG1	14	11	10	6	5
PF13772	AIG2_2	5	4	2	2	2
PF01987	AIM24	2	1	1	1	1
PF00731	AIRC	3	1	2	2	2
PF00586	AIRS	1	2	1	3	2
PF02769	AIRS_C	5	3	3	3	3
PF10469	AKAP7_NLS	3	1	2	0	1
PF00490	ALAD	3	1	1	1	1
PF01262	AlaDh_PNT_C	11	25	20	14	17
PF05222	AlaDh_PNT_N	3	2	2	2	2
PF01168	Ala_racemase_N	4	3	1	1	2
PF00171	Aldedh	28	22	18	19	19
PF01081	Aldolase	1	1	2	2	1
PF00596	Aldolase_II	3	4	2	2	2
PF01263	Aldose_epim	7	2	2	2	3
PF00248	Aldo_ket_red	19	22	12	14	13
PF15924	ALG11_N	2	1	1	1	1
PF08660	Alg14	2	1	1	1	1
PF05208	ALG3	1	1	1	1	1
PF03155	Alg6_Alg8	5	2	2	2	2
PF13949	ALIX_LYPXL_bnd	1	1	1	1	1
PF14863	Alkyl_sulf_dimr	0	3	0	1	1
PF03561	Allantoicase	1	0	1	1	1
PF04864	Alliinase_C	0	2	1	1	1
PF11744	ALMT	3	2	1	1	1
PF04030	ALO	2	1	2	2	1
PF00128	Alpha-amylase	7	2	0	0	1
PF09261	Alpha-mann_mid	3	2	3	1	2
PF02883	Alpha_adaptinC2	3	2	3	1	2
PF02816	Alpha_kinase	4	4	3	3	3
PF10369	ALS_ss_C	2	1	1	1	1
PF07344	Amastin	0	0	0	1	2
PF01425	Amidase	9	9	5	5	4
PF01979	Amidohydro_1	12	10	7	7	7
PF04909	Amidohydro_2	5	5	3	6	4
PF07969	Amidohydro_3	14	8	6	6	6
PF00155	Aminotran_1_2	51	32	32	30	27
PF00202	Aminotran_3	9	8	7	7	8
PF01063	Aminotran_4	6	4	1	2	3
PF00266	Aminotran_5	26	26	26	28	24
PF12897	Aminotran_MocR	2	4	5	4	4
PF01593	Amino_oxidase	33	25	27	23	23
PF01871	AMMECR1	1	1	1	1	1
PF00909	Ammonium_transp	7	7	9	9	7
PF14828	Amnionless	0	0	2	0	1
PF00501	AMP-binding	61	39	36	37	28
PF13193	AMP-binding_C	25	19	17	20	16
PF16561	AMPK1_CBM	1	1	2	1	2
PF04739	AMPKBI	1	1	1	1	1
PF05195	AMP_N	1	1	1	1	1
PF03256	ANAPC10	3	1	1	1	2
PF15243	ANAPC15	0	1	1	1	1
PF08672	ANAPC2	2	1	1	1	1
PF12895	ANAPC3	38	41	56	34	31
PF12894	ANAPC4_WD40	182	109	204	135	169
PF12862	ANAPC5	1	3	9	5	3
PF04049	ANAPC8	1	1	1	1	1
PF02166	Androgen_recep	1	0	0	0	1
PF01094	ANF_receptor	9	10	7	9	17
PF00023	Ank	239	92	191	161	144
PF12796	Ank_2	301	101	223	182	153
PF13606	Ank_3	265	97	200	165	150
PF13637	Ank_4	276	97	209	173	151
PF13857	Ank_5	262	97	204	170	150
PF04547	Anoctamin	4	1	7	6	4
PF03861	ANTAR	0	0	0	0	1
PF07651	ANTH	1	1	0	1	1
PF05587	Anth_Ig	2	2	1	2	2
PF04715	Anth_synt_I_N	1	2	2	2	2
PF08264	Anticodon_1	6	7	6	6	6
PF03098	An_peroxidase	4	1	0	0	2
PF01786	AOX	1	1	1	1	1
PF00847	AP2	26	15	25	28	12
PF14796	AP3B1_C	1	1	1	1	1
PF14807	AP4E_app_platf	2	1	1	1	1
PF02558	ApbA	3	7	5	6	8
PF08546	ApbA_C	3	3	3	4	2
PF02424	ApbE	2	2	1	1	1
PF18122	APC1_C	2	1	1	1	1
PF04110	APG12	3	3	2	1	1
PF04108	APG17	3	4	2	2	1
PF04106	APG5	1	1	1	1	1
PF04111	APG6	3	3	2	2	2
PF17675	APG6_N	4	4	3	5	3
PF04109	APG9	1	1	1	1	1
PF01636	APH	53	43	71	101	75
PF06105	Aph-1	1	1	1	1	1
PF05355	Apo-CII	0	0	0	0	1
PF01442	Apolipoprotein	7	5	6	12	2
PF09769	ApoO	0	0	0	0	1
PF01583	APS_kinase	1	2	2	1	2
PF10351	Apt1	0	0	0	0	1
PF06079	Apyrase	2	1	2	2	2
PF01261	AP_endonuc_2	2	1	3	2	2
PF00025	Arf	89	86	74	73	67
PF01412	ArfGap	13	9	11	11	10
PF00491	Arginase	2	2	2	3	2
PF00764	Arginosuc_synth	1	1	1	1	1
PF01960	ArgJ	1	1	1	1	1
PF03485	Arg_tRNA_synt_N	2	1	1	1	1
PF01388	ARID	7	4	5	3	4
PF11527	ARL2_Bind_BART	16	0	13	12	6
PF18719	ArlS_N	0	0	0	0	1
PF00514	Arm	58	40	49	48	32
PF10208	Armet	1	2	1	1	1
PF04826	Arm_2	4	4	5	9	8
PF16186	Arm_3	6	4	3	3	4
PF05856	ARPC4	1	1	1	1	1
PF02752	Arrestin_C	5	2	4	3	1
PF00339	Arrestin_N	4	3	4	5	1
PF02374	ArsA_ATPase	6	3	5	4	4
PF17886	ArsA_HSP20	3	2	3	2	5
PF01129	ART	0	0	1	1	1
PF16749	Arteri_nsp7a	0	0	0	0	1
PF04161	Arv1	1	1	1	1	1
PF01731	Arylesterase	0	2	2	0	1
PF04729	ASF1_hist_chap	1	1	2	1	1
PF15780	ASH	5	3	9	12	8
PF08328	ASL_C	1	3	1	1	1
PF14698	ASL_C2	1	1	1	1	1
PF01037	AsnC_trans_reg	0	0	0	0	3
PF00733	Asn_synthase	4	3	4	4	3
PF00026	Asp	10	3	4	4	2
PF00710	Asparaginase	2	1	2	2	1
PF05118	Asp_Arg_Hydrox	12	5	6	7	6
PF01177	Asp_Glu_race	1	2	2	2	2
PF13650	Asp_protease_2	6	2	2	1	1
PF01400	Astacin	12	1	5	5	9
PF04952	AstE_AspA	6	4	6	5	7
PF07855	ATG101	4	1	1	1	1
PF10033	ATG13	0	1	0	1	1
PF10186	Atg14	2	2	2	4	1
PF08614	ATG16	3	2	5	5	5
PF11700	ATG22	8	3	3	3	1
PF09451	ATG27	1	2	1	1	1
PF16420	ATG7_N	1	1	1	1	1
PF02991	Atg8	5	2	2	3	2
PF09333	ATG_C	5	3	6	4	4
PF03477	ATP-cone	2	1	2	2	1
PF02222	ATP-grasp	7	7	10	11	8
PF08442	ATP-grasp_2	4	1	1	2	3
PF02655	ATP-grasp_3	7	16	7	10	12
PF13535	ATP-grasp_4	4	4	3	3	3
PF13549	ATP-grasp_5	1	1	1	2	1
PF00217	ATP-gua_Ptrans	5	3	3	3	3
PF02807	ATP-gua_PtransN	6	3	3	2	3
PF01747	ATP-sulfurylase	1	1	1	1	1
PF00231	ATP-synt	3	1	1	1	1
PF00006	ATP-synt_ab	9	7	7	7	5
PF00306	ATP-synt_ab_C	1	1	1	1	1
PF02874	ATP-synt_ab_N	4	4	4	3	4
PF16886	ATP-synt_ab_Xtn	1	1	1	1	1
PF00137	ATP-synt_C	6	4	4	4	3
PF01813	ATP-synt_D	2	3	1	1	1
PF02823	ATP-synt_DE_N	2	1	1	1	1
PF04627	ATP-synt_Eps	2	0	1	1	1
PF01990	ATP-synt_F	2	1	1	1	1
PF06644	ATP11	1	1	1	1	1
PF07542	ATP12	1	1	1	1	1
PF12921	ATP13	1	8	1	1	1
PF06745	ATPase	6	9	8	8	7
PF01637	ATPase_2	19	17	8	10	8
PF18130	ATPgrasp_N	0	1	0	1	1
PF14397	ATPgrasp_ST	5	12	16	17	12
PF15632	ATPgrasp_Ter	4	3	4	4	4
PF14398	ATPgrasp_YheCD	14	18	24	22	16
PF03029	ATP_bind_1	6	8	4	6	9
PF01171	ATP_bind_3	2	2	2	2	2
PF05493	ATP_synt_H	1	1	1	1	1
PF09759	Atx10homo_assoc	7	10	6	6	8
PF03987	Autophagy_act_C	2	2	1	2	1
PF10381	Autophagy_C	1	1	1	1	1
PF03986	Autophagy_N	2	2	1	1	1
PF06677	Auto_anti-p27	2	1	1	1	1
PF09794	Avl9	3	1	3	1	2
PF16847	AvrPtoB_bdg	0	0	0	0	1
PF05448	AXE1	7	8	1	2	9
PF10211	Ax_dynein_light	5	0	2	3	4
PF00962	A_deaminase	5	6	5	3	4
PF02310	B12-binding	2	2	2	2	2
PF02607	B12-binding_2	1	1	1	1	1
PF09066	B2-adapt-app_C	3	4	3	3	3
PF03483	B3_4	2	1	1	1	1
PF03484	B5	2	1	1	1	1
PF01603	B56	8	4	7	5	6
PF07162	B9-C2	5	0	4	6	3
PF08840	BAAT_C	2	8	0	2	6
PF07707	BACK	5	10	6	4	4
PF18483	Bact_lectin	14	3	10	7	5
PF04513	Baculo_PEP_C	1	2	3	1	1
PF00308	Bac_DnaA	1	6	1	4	1
PF05088	Bac_GDH	1	1	1	1	1
PF01103	Bac_surface_Ag	1	1	1	1	1
PF18854	baeRF_family10	5	1	1	1	1
PF18855	baeRF_family11	0	0	0	0	1
PF02961	BAF	1	1	1	1	1
PF04684	BAF1_ABF1	0	0	0	0	1
PF02179	BAG	6	1	1	1	1
PF01145	Band_7	9	7	8	8	10
PF16200	Band_7_C	1	1	1	1	1
PF18035	Bap31_Bap29_C	2	0	2	1	2
PF03114	BAR	4	1	5	3	4
PF16746	BAR_3	2	2	2	1	1
PF10456	BAR_3_WASP_bdg	1	1	1	1	1
PF06968	BATS	1	1	1	1	1
PF01027	Bax1-I	3	2	3	3	4
PF14777	BBIP10	0	0	1	1	1
PF07289	BBL5	1	0	1	1	1
PF14779	BBS1	1	0	1	1	1
PF14782	BBS2_C	1	0	1	3	2
PF14783	BBS2_Mid	3	6	26	6	9
PF14781	BBS2_N	1	0	1	1	1
PF12490	BCAS3	1	1	1	1	1
PF02028	BCCT	2	0	3	4	3
PF10436	BCDHK_Adom3	3	4	3	3	3
PF13862	BCIP	1	1	1	1	1
PF01869	BcrAD_BadFG	0	3	1	1	1
PF14439	Bd3614-deam	1	0	1	1	1
PF02138	Beach	6	7	6	7	7
PF01062	Bestrophin	5	3	4	4	2
PF17035	BET	3	1	3	1	1
PF10996	Beta-Casp	2	3	2	2	2
PF00144	Beta-lactamase	14	8	9	11	7
PF01212	Beta_elim_lyase	10	11	15	16	10
PF13229	Beta_helix	5	3	4	4	3
PF02929	Bgal_small_N	1	1	1	0	1
PF10403	BHD_1	1	1	1	1	1
PF10404	BHD_2	1	1	1	1	1
PF10405	BHD_3	1	1	1	1	1
PF02368	Big_2	1	1	0	0	1
PF17963	Big_9	1	0	2	1	2
PF08149	BING4CT	2	1	1	1	1
PF00351	Biopterin_H	1	1	1	1	1
PF02785	Biotin_carb_C	7	6	5	6	5
PF00289	Biotin_carb_N	5	6	5	6	5
PF00364	Biotin_lipoyl	20	12	13	13	12
PF13533	Biotin_lipoyl_2	3	4	5	3	5
PF04197	Birna_RdRp	0	0	0	0	1
PF03493	BK_channel_a	2	0	6	6	5
PF17778	BLACT_WH	1	2	2	2	2
PF16507	BLM10_mid	1	1	1	1	1
PF04940	BLUF	1	1	1	2	1
PF00936	BMC	0	0	0	0	1
PF17973	bMG10	0	0	0	0	1
PF02608	Bmp	3	1	0	0	3
PF11968	Bmt2	2	1	1	1	1
PF02012	BNR	7	2	0	0	2
PF13088	BNR_2	8	2	1	0	3
PF01722	BolA	3	4	3	2	3
PF08145	BOP1NT	1	1	1	1	1
PF10157	BORCS6	0	0	0	1	1
PF12298	Bot1p	2	0	1	0	1
PF14470	bPH_3	0	0	1	1	1
PF02237	BPL_C	0	1	0	0	1
PF03099	BPL_LplA_LipB	3	2	2	2	2
PF09825	BPL_N	6	2	0	0	3
PF02485	Branch	1	0	0	0	1
PF00533	BRCT	5	5	8	6	6
PF16589	BRCT_2	7	8	8	6	7
PF08647	BRE1	1	1	1	0	1
PF04427	Brix	12	5	5	5	5
PF03097	BRO1	2	4	10	2	2
PF00439	Bromodomain	33	24	21	21	18
PF07524	Bromo_TP	1	1	1	1	2
PF03909	BSD	12	6	6	5	4
PF03092	BT1	4	4	4	3	3
PF03704	BTAD	6	2	16	6	3
PF00651	BTB	24	14	17	11	13
PF02214	BTB_2	8	3	6	8	5
PF09736	Bud13	1	1	1	1	1
PF09073	BUD22	7	1	8	3	2
PF18826	bVLRF1	1	1	1	1	1
PF05291	Bystin	2	1	1	1	1
PF00170	bZIP_1	27	14	20	16	19
PF07716	bZIP_2	22	15	16	16	10
PF15617	C-C_Bond_Lyase	2	1	1	1	1
PF00130	C1_1	3	3	3	3	2
PF03107	C1_2	4	4	3	3	3
PF07975	C1_4	1	1	0	1	1
PF00168	C2	53	18	44	40	26
PF09732	CactinC_cactus	1	1	2	2	2
PF17803	Cadherin_4	2	0	1	1	1
PF04857	CAF1	3	2	2	2	2
PF12253	CAF1A	1	2	1	1	1
PF12265	CAF1C_H4-bd	3	4	4	4	3
PF02029	Caldesmon	0	0	0	0	1
PF05042	Caleosin	0	1	4	4	5
PF01067	Calpain_III	3	0	5	3	2
PF00262	Calreticulin	3	2	2	2	2
PF01216	Calsequestrin	0	0	1	0	1
PF03160	Calx-beta	5	0	4	3	2
PF11971	CAMSAP_CH	5	4	7	6	6
PF16903	Capsid_N	1	0	0	0	4
PF05704	Caps_synth	0	3	2	1	1
PF08603	CAP_C	4	5	3	2	2
PF01302	CAP_GLY	9	3	10	8	10
PF01039	Carboxyl_trans	6	5	5	5	5
PF00194	Carb_anhydrase	2	2	5	4	3
PF01256	Carb_kinase	2	1	1	1	1
PF00755	Carn_acyltransf	16	8	7	6	7
PF07779	Cas1_AcylT	2	1	1	1	1
PF15927	Casc1_N	1	0	1	1	1
PF08172	CASP_C	3	1	2	2	2
PF14526	Cass2	0	0	0	0	1
PF06241	Castor_Poll_mid	1	1	1	1	1
PF03378	CAS_CSE1	1	2	1	1	1
PF00199	Catalase	1	0	1	2	1
PF06628	Catalase-rel	0	0	1	2	1
PF08773	CathepsinC_exc	1	0	1	1	1
PF13246	Cation_ATPase	20	10	10	13	15
PF00689	Cation_ATPase_C	8	6	4	5	7
PF00690	Cation_ATPase_N	7	6	7	5	6
PF01545	Cation_efflux	14	11	13	17	8
PF15020	CATSPERD	0	0	1	1	1
PF15064	CATSPERG	1	0	1	1	1
PF01693	Cauli_VI	2	1	0	0	1
PF03914	CBF	4	3	3	3	2
PF02045	CBFB_NFYA	1	1	0	1	2
PF00808	CBFD_NFYB_HMF	9	21	12	15	20
PF01656	CbiA	7	12	7	8	10
PF01903	CbiX	1	2	2	2	1
PF00734	CBM_1	4	5	0	2	3
PF00686	CBM_20	2	2	2	2	1
PF11658	CBP_BcsG	0	0	0	0	1
PF06564	CBP_BcsQ	3	3	4	2	1
PF00571	CBS	28	14	15	15	12
PF15625	CC2D2AN-C2	0	0	1	1	1
PF06244	Ccdc124	1	2	1	1	1
PF10152	CCDC53	13	11	11	8	6
PF06203	CCT	6	6	4	5	5
PF01130	CD36	2	3	3	3	1
PF06395	CDC24	3	1	2	1	2
PF09507	CDC27	1	1	1	1	1
PF08564	CDC37_C	3	1	1	1	1
PF08565	CDC37_M	3	1	1	1	1
PF03234	CDC37_N	3	1	1	1	1
PF02724	CDC45	2	1	8	2	2
PF02933	CDC48_2	1	3	1	2	1
PF02359	CDC48_N	1	3	2	2	1
PF03381	CDC50	2	1	1	1	1
PF05179	CDC73_C	1	1	1	1	1
PF16050	CDC73_N	1	1	0	0	1
PF18484	CDCA	0	0	0	0	1
PF05995	CDO_I	1	2	1	1	1
PF01066	CDP-OH_P_transf	8	5	6	6	9
PF03498	CDtoxinA	1	1	0	0	1
PF16366	CEBP_ZZ	0	0	2	4	3
PF00150	Cellulase	10	7	3	3	9
PF10473	CENP-F_leu_zip	4	5	5	0	1
PF07778	CENP-I	1	1	1	1	1
PF13092	CENP-L	2	1	1	1	1
PF11111	CENP-M	1	0	1	1	1
PF05238	CENP-N	0	1	1	1	1
PF13094	CENP-Q	0	1	0	0	1
PF15630	CENP-S	5	8	6	9	13
PF15511	CENP-T_C	6	10	6	11	12
PF09415	CENP-X	4	0	1	2	1
PF14933	CEP19	2	0	1	1	1
PF15627	CEP76-C2	2	0	2	1	1
PF05875	Ceramidase	9	6	3	2	4
PF04734	Ceramidase_alk	4	1	2	2	2
PF17048	Ceramidse_alk_C	3	1	2	2	2
PF14738	CFAP91	1	0	1	1	1
PF08617	CGI-121	0	1	0	0	1
PF03879	Cgr1	1	1	1	1	1
PF00307	CH	18	16	15	16	13
PF04752	ChaC	1	1	1	1	1
PF16035	Chalcone_2	2	1	1	1	1
PF05257	CHAP	1	0	0	0	6
PF09295	ChAPs	0	3	1	2	3
PF17150	CHASE6_C	1	0	1	1	1
PF12770	CHAT	3	2	4	3	1
PF06747	CHCH	5	4	6	5	5
PF08073	CHDNT	1	2	1	2	1
PF13541	ChlI	4	3	2	2	2
PF07224	Chlorophyllase	1	4	0	2	3
PF12740	Chlorophyllase2	5	7	2	5	6
PF01633	Choline_kinase	4	6	5	5	4
PF04515	Choline_transpo	5	5	5	5	7
PF04968	CHORD	2	1	1	1	1
PF12624	Chorein_N	9	4	10	5	6
PF00425	Chorismate_bind	2	2	2	2	2
PF01264	Chorismate_synt	3	1	1	1	1
PF02417	Chromate_transp	0	1	1	1	1
PF00385	Chromo	6	7	7	4	4
PF06573	Churchill	1	1	1	1	1
PF06294	CH_2	5	2	6	7	5
PF08547	CIA30	1	1	1	1	1
PF05093	CIAPIN1	1	1	1	1	1
PF02464	CinA	1	1	1	1	1
PF03600	CitMHS	6	2	10	8	1
PF16114	Citrate_bind	3	0	0	0	1
PF00285	Citrate_synt	2	1	1	1	2
PF15011	CK2S	0	1	0	0	2
PF01111	CKS	2	1	1	1	1
PF01214	CK_II_beta	2	1	1	2	2
PF12348	CLASP_N	10	8	11	14	11
PF00637	Clathrin	11	10	11	11	8
PF13838	Clathrin_H_link	1	1	1	1	1
PF01086	Clathrin_lg_ch	2	1	2	2	2
PF01394	Clathrin_propel	1	1	1	1	1
PF01217	Clat_adaptor_s	9	7	10	10	10
PF02487	CLN3	1	1	2	3	2
PF06807	Clp1	1	1	1	1	1
PF16573	CLP1_N	1	0	1	1	1
PF16575	CLP1_P	3	3	3	4	4
PF10431	ClpB_D2-small	4	4	5	6	4
PF05602	CLPTM1	2	2	1	1	1
PF02861	Clp_N	1	1	2	3	1
PF00574	CLP_protease	2	3	2	2	3
PF14420	Clr5	0	0	0	0	1
PF10607	CLTH	3	4	5	4	3
PF13236	CLU	3	1	4	4	4
PF10234	Cluap1	1	0	1	1	1
PF02353	CMAS	13	11	11	15	11
PF08583	Cmc1	4	3	2	5	2
PF14617	CMS1	1	4	3	2	1
PF12717	Cnd1	24	26	30	30	26
PF05786	Cnd2	2	1	1	1	1
PF12719	Cnd3	3	3	4	5	3
PF16858	CNDH2_C	1	1	2	1	1
PF06278	CNDH2_N	2	1	2	0	2
PF00780	CNH	2	0	2	0	5
PF00027	cNMP_binding	77	33	72	57	55
PF07989	Cnn_1N	0	2	2	1	1
PF10155	CNOT11	1	1	1	1	1
PF16415	CNOT1_CAF1_bind	1	1	1	1	1
PF16418	CNOT1_HEAT	1	1	1	1	1
PF16417	CNOT1_TTP_bind	1	1	1	1	1
PF00795	CN_hydrolase	6	6	4	4	5
PF08695	Coa1	0	1	2	2	1
PF01121	CoaE	4	3	3	3	3
PF07718	Coatamer_beta_C	1	1	1	1	1
PF14806	Coatomer_b_Cpla	1	1	1	1	1
PF04733	Coatomer_E	2	2	29	6	4
PF16381	Coatomer_g_Cpla	1	1	1	1	1
PF04053	Coatomer_WDAD	7	3	7	7	7
PF02629	CoA_binding	6	2	2	2	3
PF13380	CoA_binding_2	2	3	3	3	3
PF01144	CoA_trans	2	2	3	2	2
PF02515	CoA_transf_3	12	9	7	8	6
PF02654	CobS	1	0	1	1	1
PF02492	cobW	19	19	16	16	15
PF07683	CobW_C	6	10	7	6	5
PF01923	Cob_adeno_trans	1	1	1	1	1
PF15296	Codanin-1_C	0	0	0	0	1
PF00135	COesterase	13	14	12	8	5
PF00241	Cofilin_ADF	9	13	6	6	6
PF06148	COG2	1	3	2	2	3
PF08318	COG4	2	3	2	2	2
PF10392	COG5	2	1	1	3	2
PF06419	COG6	2	1	2	2	1
PF10191	COG7	4	2	2	2	2
PF10345	Cohesin_load	0	1	0	0	1
PF17221	COMMD1_N	0	0	0	0	3
PF01512	Complex1_51K	1	1	1	1	1
PF05347	Complex1_LYR	9	10	8	9	8
PF13232	Complex1_LYR_1	1	1	1	0	1
PF13233	Complex1_LYR_2	1	7	3	4	4
PF00668	Condensation	6	6	1	1	2
PF12422	Condensin2nSMC	2	2	1	1	1
PF03601	Cons_hypoth698	1	1	1	1	1
PF03602	Cons_hypoth95	6	6	6	7	4
PF08752	COP-gamma_platf	1	1	1	1	1
PF07970	COPIIcoated_ERV	4	5	4	4	3
PF07002	Copine	9	2	4	4	3
PF08507	COPI_assoc	6	3	4	4	3
PF06957	COPI_C	1	1	1	1	1
PF01218	Coprogen_oxidas	2	0	1	1	2
PF05019	Coq4	1	1	1	1	1
PF03232	COQ7	0	0	0	0	1
PF08511	COQ9	1	1	1	1	1
PF16095	COR	24	65	54	16	4
PF01544	CorA	3	4	4	4	3
PF09304	Cortex-I_coil	0	0	1	1	1
PF14705	Costars	13	9	7	7	6
PF02628	COX15-CtaA	1	1	1	1	1
PF05051	COX17	0	1	0	2	1
PF01215	COX5B	1	1	1	1	1
PF02046	COX6A	1	1	1	1	1
PF02297	COX6B	1	2	1	2	1
PF08144	CPL	2	2	2	5	2
PF00166	Cpn10	2	1	1	1	1
PF00118	Cpn60_TCP1	22	10	14	11	9
PF02786	CPSase_L_D2	15	9	10	11	11
PF02787	CPSase_L_D3	2	2	2	2	2
PF00988	CPSase_sm_chain	2	2	2	2	2
PF13299	CPSF100_C	1	1	1	0	1
PF11718	CPSF73-100_C	1	1	1	1	1
PF03178	CPSF_A	3	3	3	3	2
PF07931	CPT	0	1	0	1	1
PF14353	CpXC	0	1	1	0	1
PF00650	CRAL_TRIO	52	44	34	32	27
PF13716	CRAL_TRIO_2	11	6	12	5	10
PF03765	CRAL_TRIO_N	6	9	7	7	4
PF01321	Creatinase_N	0	1	1	1	1
PF16189	Creatinase_N_2	0	1	1	1	1
PF09030	Creb_binding	0	0	0	0	1
PF18061	CRISPR_Cas9_WED	0	0	0	0	1
PF08767	CRM1_C	3	2	2	2	2
PF18777	CRM1_repeat	2	1	1	1	2
PF18784	CRM1_repeat_2	1	1	1	1	2
PF18787	CRM1_repeat_3	1	1	1	1	2
PF08627	CRT-like	8	6	6	6	5
PF07143	CrtC	1	1	1	0	1
PF04969	CS	8	10	9	11	8
PF00313	CSD	5	4	3	2	3
PF17876	CSD2	1	2	3	3	2
PF08506	Cse1	2	1	1	2	1
PF08943	CsiD	0	2	0	1	2
PF10075	CSN8_PSD8_EIF3K	3	4	3	3	3
PF14327	CSTF2_hinge	1	0	1	1	1
PF14304	CSTF_C	0	1	0	0	2
PF04442	CtaG_Cox11	1	1	1	1	1
PF04818	CTD_bind	5	5	4	3	2
PF09696	Ctf8	1	1	1	1	1
PF08216	CTNNBL	1	1	2	1	1
PF06418	CTP_synth_N	1	1	1	1	1
PF01148	CTP_transf_1	3	2	2	1	1
PF02348	CTP_transf_3	2	1	2	1	1
PF01467	CTP_transf_like	11	8	8	7	7
PF04145	Ctr	2	4	3	3	1
PF07731	Cu-oxidase_2	3	4	3	1	1
PF07732	Cu-oxidase_3	4	6	3	2	2
PF01082	Cu2_monooxygen	7	6	2	0	3
PF03712	Cu2_monoox_C	12	8	2	0	5
PF02845	CUE	0	2	2	1	4
PF00888	Cullin	6	5	5	5	5
PF03556	Cullin_binding	2	2	2	2	2
PF10557	Cullin_Nedd8	3	3	4	4	4
PF07883	Cupin_2	2	3	4	8	11
PF08007	Cupin_4	28	12	11	16	10
PF13621	Cupin_8	51	27	29	30	21
PF03091	CutA1	0	0	0	0	1
PF03932	CutC	1	0	0	0	1
PF01083	Cutinase	1	3	1	1	1
PF16860	CX9C	3	1	1	3	2
PF18721	CxC6	6	5	1	2	1
PF05328	CybS	1	1	1	1	1
PF08613	Cyclin	10	17	12	11	10
PF02984	Cyclin_C	6	5	8	7	6
PF00134	Cyclin_N	19	26	19	19	17
PF00031	Cystatin	2	0	1	1	1
PF01053	Cys_Met_Meta_PP	23	15	15	14	16
PF00173	Cyt-b5	49	33	31	29	37
PF02224	Cytidylate_kin	0	3	1	0	2
PF13442	Cytochrome_CBB3	2	2	2	1	1
PF03188	Cytochrom_B561	14	5	7	4	7
PF00034	Cytochrom_C	2	1	1	1	1
PF02167	Cytochrom_C1	2	1	1	1	1
PF02239	Cytochrom_D1	7	5	5	5	5
PF01265	Cyto_heme_lyase	2	2	2	2	1
PF10890	Cyt_b-c1_8	0	1	1	2	1
PF14031	D-ser_dehydrat	2	1	0	0	1
PF07065	D123	2	2	1	1	1
PF07876	Dabb	1	1	0	0	1
PF03982	DAGAT	7	6	3	4	5
PF00609	DAGK_acc	4	3	3	3	3
PF00781	DAGK_cat	12	7	10	8	9
PF00793	DAHP_synth_1	6	3	3	3	3
PF01474	DAHP_synth_2	1	1	1	1	1
PF02733	Dak1	2	0	1	1	1
PF02734	Dak2	1	0	1	1	1
PF07478	Dala_Dala_lig_C	7	8	8	8	7
PF05746	DALR_1	2	2	1	1	1
PF09190	DALR_2	0	1	1	1	1
PF05869	Dam	0	0	0	2	2
PF01266	DAO	70	65	63	57	57
PF16901	DAO_C	2	1	2	2	2
PF10236	DAP3	1	1	1	1	1
PF05173	DapB_C	2	1	1	1	1
PF01113	DapB_N	2	2	1	3	3
PF08650	DASH_Dad4	0	0	1	1	1
PF02277	DBI_PRT	1	0	1	1	1
PF08147	DBP10CT	1	0	1	1	1
PF05011	DBR1	1	1	1	1	1
PF16213	DCB	3	2	3	2	1
PF09724	Dcc1	2	1	1	1	1
PF06559	DCD	2	1	1	1	1
PF00383	dCMP_cyt_deam_1	7	6	8	8	7
PF05026	DCP2	1	1	1	1	1
PF11969	DcpS_C	12	5	7	9	6
PF03455	dDENN	3	2	6	5	1
PF13358	DDE_3	4	0	5	0	5
PF01609	DDE_Tnp_1	4	0	2	0	1
PF13843	DDE_Tnp_1_7	2	0	3	3	2
PF01526	DDE_Tnp_Tn3	0	0	0	0	1
PF02862	DDHD	1	1	1	2	1
PF03345	DDOST_48kD	1	0	1	1	1
PF02791	DDT	3	1	2	2	1
PF00270	DEAD	88	69	66	68	71
PF06733	DEAD_2	6	5	5	5	3
PF01041	DegT_DnrJ_EryC1	15	9	9	8	10
PF08766	DEK_C	2	4	2	1	1
PF02141	DENN	11	7	12	11	7
PF01791	DeoC	1	1	1	1	1
PF00455	DeoRC	0	0	0	1	2
PF00610	DEP	4	3	3	7	2
PF04511	DER1	4	4	2	2	3
PF04127	DFP	1	2	2	1	1
PF16543	DFRP_C	2	2	2	2	2
PF11038	DGF-1_5	0	0	0	0	1
PF00926	DHBP_synthase	1	1	1	1	1
PF08385	DHC_N1	9	1	8	7	8
PF08393	DHC_N2	11	1	20	20	19
PF00701	DHDPS	2	5	1	1	1
PF00186	DHFR_1	2	2	1	0	2
PF01368	DHH	4	4	2	2	2
PF02833	DHHA2	2	3	2	1	2
PF01529	DHHC	18	17	15	16	14
PF01180	DHO_dh	2	2	1	2	1
PF01487	DHquinase_I	1	1	1	1	1
PF01761	DHQ_synthase	2	1	4	3	2
PF06920	DHR-2	1	0	1	1	1
PF18595	DHR10	2	2	2	2	2
PF05462	Dicty_CAR	2	3	3	2	4
PF02966	DIM1	1	1	1	1	1
PF12867	DinB_2	2	1	1	1	1
PF00775	Dioxygenase_C	0	1	3	1	1
PF14226	DIOX_N	3	7	6	7	8
PF01866	Diphthamide_syn	2	2	2	2	3
PF01902	Diphthami_syn_2	3	2	2	2	3
PF00200	Disintegrin	6	1	2	3	2
PF00778	DIX	1	3	2	2	1
PF01965	DJ-1_PfpI	9	4	3	3	7
PF08068	DKCLD	1	1	1	1	1
PF01738	DLH	23	20	9	12	12
PF05783	DLIC	4	0	2	2	2
PF03474	DMA	0	0	0	0	2
PF05499	DMAP1	1	1	1	1	1
PF00885	DMRL_synthase	1	1	1	1	1
PF04657	DMT_YdcZ	1	0	2	4	1
PF03796	DnaB_C	5	5	6	4	3
PF00226	DnaJ	60	57	55	56	52
PF14308	DnaJ-X	2	3	1	1	1
PF01556	DnaJ_C	8	7	5	7	7
PF00684	DnaJ_CXXCXGXG	2	3	2	2	2
PF08713	DNA_alkylation	1	2	1	1	1
PF01035	DNA_binding_1	3	1	1	2	2
PF00204	DNA_gyraseB	3	2	2	4	3
PF04679	DNA_ligase_A_C	2	3	3	3	3
PF01068	DNA_ligase_A_M	6	3	4	4	5
PF04675	DNA_ligase_A_N	3	3	3	2	3
PF14743	DNA_ligase_OB_2	2	0	1	0	2
PF00145	DNA_methylase	3	3	2	2	1
PF01119	DNA_mis_repair	2	3	3	2	3
PF00875	DNA_photolyase	2	4	3	5	3
PF06144	DNA_pol3_delta	0	2	2	1	1
PF13177	DNA_pol3_delta2	4	4	6	8	5
PF00476	DNA_pol_A	0	2	1	1	1
PF01612	DNA_pol_A_exo1	6	6	5	5	6
PF00136	DNA_pol_B	8	4	5	7	5
PF03104	DNA_pol_B_exo1	8	4	5	6	4
PF10108	DNA_pol_B_exo2	2	1	1	2	1
PF14792	DNA_pol_B_palm	1	0	1	1	1
PF14791	DNA_pol_B_thumb	1	0	1	1	1
PF18018	DNA_pol_D_N	1	2	1	1	1
PF04042	DNA_pol_E_B	5	3	3	3	3
PF10391	DNA_pol_lambd_f	2	0	1	1	1
PF04104	DNA_primase_lrg	1	1	1	1	1
PF01896	DNA_primase_S	2	1	1	1	1
PF03604	DNA_RNApol_7kD	3	1	1	1	1
PF00521	DNA_topoisoIV	5	2	3	4	3
PF01712	dNK	1	1	0	1	1
PF00404	Dockerin_1	3	3	2	3	7
PF03351	DOMON	12	6	6	1	8
PF08883	DOPA_dioxygen	0	0	1	0	1
PF04124	Dor1	3	2	2	3	3
PF08123	DOT1	5	7	8	7	4
PF08781	DP	2	1	1	1	1
PF00930	DPPIV_N	2	2	1	1	1
PF05186	Dpy-30	3	1	6	3	2
PF11719	Drc1-Sld2	1	1	3	1	2
PF05219	DREV	5	4	2	4	2
PF07539	DRIM	2	1	1	1	1
PF07522	DRMBL	0	3	3	2	1
PF07085	DRTGG	1	1	1	1	1
PF01916	DS	1	1	1	1	1
PF01323	DSBA	11	11	6	6	5
PF01984	dsDNA_bind	1	1	1	1	1
PF08148	DSHCT	2	2	2	2	2
PF00782	DSPc	25	37	21	23	22
PF14671	DSPn	1	1	1	1	1
PF05160	DSS1_SEM1	3	0	1	1	1
PF18102	DTC	1	2	1	1	1
PF03942	DTW	2	2	0	0	1
PF06370	DUF1069	0	0	0	0	2
PF06417	DUF1077	1	1	1	1	1
PF06454	DUF1084	2	1	2	2	1
PF06544	DUF1115	2	1	1	1	1
PF06565	DUF1126	2	0	3	2	3
PF06570	DUF1129	0	1	0	0	1
PF06842	DUF1242	0	1	0	1	1
PF06844	DUF1244	1	1	1	0	1
PF06916	DUF1279	6	3	3	3	2
PF06966	DUF1295	7	8	6	5	4
PF06974	DUF1298	4	7	4	1	5
PF07039	DUF1325	3	3	5	9	6
PF07059	DUF1336	15	13	13	12	15
PF07103	DUF1365	2	1	1	0	1
PF07128	DUF1380	0	0	0	0	1
PF07159	DUF1394	1	2	1	2	2
PF07394	DUF1501	0	4	1	0	4
PF17384	DUF150_C	0	0	0	1	2
PF07433	DUF1513	2	0	0	0	8
PF07563	DUF1541	0	0	0	0	1
PF02582	DUF155	3	2	2	2	3
PF07610	DUF1573	0	0	5	6	4
PF07713	DUF1604	1	1	1	1	1
PF07773	DUF1619	1	0	1	1	1
PF07798	DUF1640	0	0	2	0	1
PF07849	DUF1641	0	0	0	0	1
PF07865	DUF1652	0	2	0	0	1
PF07889	DUF1664	4	6	2	3	1
PF07896	DUF1674	2	1	1	1	1
PF07914	DUF1679	1	2	3	3	2
PF07933	DUF1681	1	1	1	1	2
PF07946	DUF1682	2	1	1	1	1
PF08213	DUF1713	2	1	1	1	1
PF08351	DUF1726	1	1	1	1	1
PF08354	DUF1729	2	1	1	1	1
PF08409	DUF1736	4	2	2	3	1
PF08427	DUF1741	1	1	0	1	1
PF08490	DUF1744	0	1	1	1	1
PF08538	DUF1749	2	1	1	1	1
PF08576	DUF1764	1	1	1	1	1
PF08719	DUF1768	1	2	1	2	1
PF08592	DUF1772	0	2	0	0	1
PF08643	DUF1776	1	3	2	1	2
PF02622	DUF179	5	2	4	4	2
PF08760	DUF1793	0	0	1	1	1
PF08811	DUF1800	0	3	1	0	4
PF08907	DUF1853	1	1	1	1	1
PF08953	DUF1899	2	4	3	3	2
PF09320	DUF1977	1	1	1	1	1
PF09324	DUF1981	1	1	2	1	1
PF09369	DUF1998	1	1	1	1	1
PF09418	DUF2009	3	2	2	2	2
PF09430	DUF2012	1	1	1	1	1
PF09431	DUF2013	1	1	1	1	1
PF02656	DUF202	8	2	3	4	3
PF10217	DUF2039	1	1	1	1	1
PF09755	DUF2046	2	1	1	1	1
PF09752	DUF2048	0	5	4	0	1
PF09747	DUF2052	0	0	0	1	1
PF09834	DUF2061	1	0	1	1	1
PF09843	DUF2070	0	0	0	0	1
PF09849	DUF2076	2	1	0	0	1
PF01595	DUF21	4	2	3	3	3
PF09880	DUF2107	0	0	0	0	1
PF09922	DUF2154	3	1	0	0	1
PF10223	DUF2181	0	1	1	1	1
PF09949	DUF2183	1	1	2	2	1
PF09953	DUF2187	1	0	0	0	1
PF09967	DUF2201	0	0	0	0	1
PF09973	DUF2208	0	0	0	0	1
PF09986	DUF2225	4	15	16	7	5
PF09995	DUF2236	4	3	3	3	2
PF10009	DUF2252	1	2	2	3	1
PF10011	DUF2254	1	0	3	3	1
PF10021	DUF2263	3	2	1	1	2
PF02995	DUF229	0	3	2	2	3
PF10067	DUF2306	2	1	1	1	2
PF10080	DUF2318	0	0	0	0	1
PF10084	DUF2322	0	0	0	0	1
PF09804	DUF2347	0	0	1	1	1
PF09789	DUF2353	1	0	4	3	1
PF10166	DUF2368	1	1	1	1	1
PF10180	DUF2373	1	1	1	1	1
PF09543	DUF2379	0	0	1	0	13
PF10302	DUF2407	2	6	3	4	3
PF10354	DUF2431	6	5	5	5	4
PF10382	DUF2439	0	1	0	1	1
PF10474	DUF2451	2	2	2	2	2
PF10615	DUF2470	0	2	1	1	1
PF10846	DUF2722	1	0	3	4	3
PF11028	DUF2723	2	0	3	3	1
PF03314	DUF273	2	1	4	1	1
PF11074	DUF2779	1	0	1	1	1
PF11443	DUF2828	1	0	0	0	1
PF11196	DUF2834	2	2	1	2	1
PF10998	DUF2838	3	2	2	3	3
PF11017	DUF2855	2	2	1	0	1
PF11069	DUF2870	1	2	1	1	3
PF03479	DUF296	1	0	1	1	1
PF11187	DUF2974	0	4	1	1	1
PF17479	DUF3048_C	0	0	0	1	1
PF03713	DUF305	2	1	2	1	1
PF11286	DUF3087	0	0	0	0	1
PF11288	DUF3089	3	2	0	1	1
PF11377	DUF3180	0	0	0	0	1
PF11539	DUF3228	1	1	1	1	1
PF11815	DUF3336	0	1	0	0	1
PF11822	DUF3342	1	0	1	1	2
PF11841	DUF3361	1	3	0	2	1
PF11849	DUF3369	0	0	0	0	1
PF11858	DUF3378	1	1	1	1	1
PF11861	DUF3381	8	1	1	1	1
PF11865	DUF3385	7	3	4	4	3
PF11875	DUF3395	2	2	2	3	2
PF11885	DUF3405	0	0	1	0	1
PF11919	DUF3437	1	2	1	2	1
PF11931	DUF3449	1	1	1	1	1
PF11932	DUF3450	1	0	4	1	2
PF11935	DUF3453	0	1	1	1	1
PF11940	DUF3458	3	0	1	1	1
PF17432	DUF3458_C	1	0	1	1	2
PF11960	DUF3474	0	0	1	0	1
PF12022	DUF3510	1	1	1	1	1
PF12036	DUF3522	5	2	2	2	2
PF12037	DUF3523	2	1	2	2	2
PF12038	DUF3524	1	1	1	1	1
PF12043	DUF3527	0	0	1	0	1
PF12054	DUF3535	0	0	0	0	1
PF12126	DUF3583	0	0	0	0	1
PF12128	DUF3584	3	4	1	2	1
PF12157	DUF3591	2	0	1	0	1
PF12340	DUF3638	8	3	5	4	4
PF12345	DUF3641	2	1	1	1	1
PF12359	DUF3645	4	3	4	4	4
PF12394	DUF3657	1	1	1	1	1
PF12463	DUF3689	1	0	1	1	1
PF12481	DUF3700	1	1	1	1	1
PF04123	DUF373	2	0	0	0	1
PF04028	DUF374	0	0	0	0	1
PF12566	DUF3748	0	0	0	0	1
PF12597	DUF3767	1	1	1	1	1
PF10300	DUF3808	4	6	4	2	2
PF12725	DUF3810	0	0	0	0	1
PF12842	DUF3819	1	1	1	1	1
PF04037	DUF382	1	1	1	1	1
PF04063	DUF383	1	1	2	2	1
PF04064	DUF384	2	1	1	1	1
PF12968	DUF3856	5	9	16	7	8
PF12977	DUF3861	0	1	0	0	1
PF13020	DUF3883	1	1	1	1	1
PF04087	DUF389	3	3	3	3	1
PF13045	DUF3905	0	0	0	0	1
PF04134	DUF393	4	2	1	1	1
PF13195	DUF4011	3	0	1	0	1
PF13271	DUF4062	4	0	6	3	1
PF13301	DUF4079	0	0	1	0	1
PF04190	DUF410	1	3	1	1	1
PF13422	DUF4110	1	1	1	1	1
PF13600	DUF4140	0	2	0	0	1
PF13747	DUF4164	0	0	0	0	1
PF13863	DUF4200	5	0	4	3	4
PF13870	DUF4201	2	1	2	2	3
PF13875	DUF4202	1	0	0	0	1
PF13898	DUF4205	2	1	3	3	3
PF13904	DUF4207	0	0	1	2	1
PF13938	DUF4213	0	2	1	1	1
PF13959	DUF4217	5	4	4	4	4
PF04241	DUF423	1	1	1	1	1
PF14033	DUF4246	6	0	0	7	3
PF14085	DUF4265	0	0	2	0	4
PF14258	DUF4350	0	0	0	0	1
PF14332	DUF4388	0	0	0	0	1
PF14362	DUF4407	2	0	3	1	2
PF14539	DUF4442	2	2	1	1	1
PF04286	DUF445	3	3	3	2	3
PF14643	DUF4455	1	0	1	1	1
PF14652	DUF4457	1	1	1	0	1
PF14713	DUF4464	1	0	1	1	2
PF14737	DUF4470	4	2	2	2	1
PF14740	DUF4471	1	0	1	1	1
PF14739	DUF4472	1	0	1	1	1
PF14771	DUF4476	2	0	1	1	1
PF14825	DUF4483	1	0	1	1	1
PF14846	DUF4485	1	0	0	1	1
PF14926	DUF4498	1	0	1	1	1
PF01863	DUF45	0	2	1	1	2
PF14956	DUF4505	2	0	1	1	1
PF15016	DUF4520	1	0	2	1	1
PF15025	DUF4524	0	1	1	1	1
PF15047	DUF4533	0	0	0	0	1
PF15057	DUF4537	1	1	7	9	5
PF04305	DUF455	1	0	1	1	1
PF15143	DUF4575	0	0	0	0	1
PF15239	DUF4586	1	0	2	1	1
PF15370	DUF4598	0	1	0	1	1
PF15377	DUF4604	0	1	0	0	1
PF15700	DUF4667	0	0	1	0	1
PF16043	DUF4795	1	0	1	0	1
PF16062	DUF4804	1	0	1	1	1
PF16068	DUF4810	0	2	0	1	2
PF16092	DUF4821	0	0	1	1	1
PF16116	DUF4832	1	0	0	0	2
PF16117	DUF4833	5	2	2	2	2
PF16147	DUF4855	0	0	0	0	1
PF16173	DUF4874	0	0	0	0	2
PF16227	DUF4886	2	1	1	2	2
PF16314	DUF4954	5	2	3	2	2
PF16335	DUF4965	0	0	1	1	1
PF04430	DUF498	1	1	1	1	1
PF16353	DUF4981	0	0	1	0	1
PF16378	DUF4988	0	0	0	0	2
PF16392	DUF5001	0	0	1	1	1
PF16403	DUF5011	0	0	0	0	1
PF16465	DUF5046	0	1	4	0	2
PF17140	DUF5113	9	8	26	7	2
PF17141	DUF5114	0	0	0	0	1
PF17168	DUF5127	0	0	1	1	1
PF04379	DUF525	2	2	2	2	1
PF04784	DUF547	5	2	2	2	2
PF17569	DUF5475	0	0	0	0	1
PF17731	DUF5570	0	0	0	0	1
PF17741	DUF5578	0	1	0	1	1
PF17743	DUF5580	0	0	0	0	1
PF18150	DUF5600	3	3	2	2	2
PF04481	DUF561	0	1	0	0	1
PF04577	DUF563	10	4	7	7	3
PF04502	DUF572	3	2	1	1	1
PF04842	DUF639	4	0	1	1	1
PF04884	DUF647	2	1	2	1	2
PF05018	DUF667	3	1	4	4	4
PF05057	DUF676	7	4	4	4	4
PF05167	DUF711	1	1	1	1	1
PF05266	DUF724	0	1	1	0	1
PF05277	DUF726	2	2	1	1	1
PF05303	DUF727	0	1	0	0	1
PF05335	DUF745	0	1	0	0	1
PF05346	DUF747	1	1	1	1	1
PF05600	DUF773	1	1	1	1	1
PF05603	DUF775	3	1	0	0	1
PF05608	DUF778	1	1	0	1	1
PF05667	DUF812	4	2	3	3	1
PF05673	DUF815	4	13	13	10	8
PF05677	DUF818	1	5	2	2	1
PF05688	DUF824	0	0	0	0	1
PF05705	DUF829	2	2	2	3	1
PF05787	DUF839	1	0	0	0	1
PF05811	DUF842	1	1	1	1	1
PF05832	DUF846	1	1	1	1	1
PF05907	DUF866	1	1	1	1	1
PF01935	DUF87	1	2	7	3	6
PF05957	DUF883	4	1	2	7	3
PF05960	DUF885	2	0	0	1	4
PF01937	DUF89	2	1	1	1	1
PF05987	DUF898	0	0	0	0	1
PF05990	DUF900	6	3	1	1	1
PF06001	DUF902	0	1	0	0	1
PF01940	DUF92	1	0	1	1	1
PF06080	DUF938	2	0	0	0	2
PF06110	DUF953	2	0	1	1	1
PF06127	DUF962	2	2	2	1	1
PF06149	DUF969	0	0	0	0	1
PF06155	DUF971	3	3	4	4	2
PF06159	DUF974	1	1	0	1	2
PF01207	Dus	9	6	6	7	6
PF06337	DUSP	5	4	7	4	1
PF00692	dUTPase	3	2	1	2	3
PF08783	DWNN	1	1	1	1	1
PF13292	DXP_synthase_N	2	2	1	1	2
PF09742	Dymeclin	1	1	1	1	1
PF01031	Dynamin_M	4	1	2	2	1
PF00350	Dynamin_N	21	22	20	19	17
PF04912	Dynamitin	2	1	2	1	1
PF17852	Dynein_AAA_lid	6	1	17	18	17
PF18199	Dynein_C	22	0	18	18	18
PF03028	Dynein_heavy	18	1	20	21	19
PF01221	Dynein_light	10	1	7	8	6
PF04261	Dyp_perox	1	1	1	1	1
PF13815	Dzip-like_N	3	1	3	3	1
PF12773	DZR	0	1	0	2	1
PF00122	E1-E2_ATPase	27	17	16	21	20
PF16191	E1_4HB	6	4	4	3	3
PF02221	E1_DerP2_DerF2	0	0	1	0	1
PF00676	E1_dh	7	5	5	5	5
PF16190	E1_FCCH	5	4	2	2	2
PF09358	E1_UFD	5	4	3	3	3
PF08825	E2_bind	1	1	1	1	1
PF02817	E3_binding	5	3	2	2	2
PF09743	E3_UFM1_ligase	1	1	1	1	1
PF00892	EamA	32	31	23	19	22
PF04157	EAP30	4	2	2	2	2
PF01683	EB	1	0	0	0	1
PF03271	EB1	2	2	1	1	1
PF05241	EBP	1	2	2	1	2
PF05890	Ebp2	1	1	1	1	1
PF00378	ECH_1	34	41	28	27	24
PF16113	ECH_2	34	40	27	26	23
PF02958	EcKinase	7	8	12	16	6
PF13001	Ecm29	2	2	1	2	1
PF14382	ECR1_N	2	2	1	2	2
PF00036	EF-hand_1	166	66	165	162	131
PF14788	EF-hand_10	2	3	3	5	9
PF08976	EF-hand_11	6	4	6	8	4
PF17958	EF-hand_13	2	2	2	2	2
PF17959	EF-hand_14	1	2	2	3	6
PF09068	EF-hand_2	0	1	1	1	1
PF09069	EF-hand_3	0	0	0	0	1
PF12763	EF-hand_4	26	24	26	27	23
PF13202	EF-hand_5	131	54	131	127	104
PF13405	EF-hand_6	162	64	169	156	131
PF13499	EF-hand_7	175	66	183	166	129
PF13833	EF-hand_8	143	55	144	130	113
PF14658	EF-hand_9	22	17	20	28	24
PF00647	EF1G	2	1	1	1	1
PF00736	EF1_GNE	6	4	2	2	3
PF10153	Efg1	1	2	1	1	1
PF00679	EFG_C	12	7	7	7	7
PF14492	EFG_II	9	5	6	6	6
PF03764	EFG_IV	6	4	3	4	3
PF08726	EFhand_Ca_insen	0	1	1	2	1
PF08207	EFP_N	3	1	1	1	1
PF11957	efThoc1	1	1	1	1	1
PF16004	EFTUD2	1	1	1	1	1
PF08355	EF_assoc_1	1	1	1	1	1
PF08356	EF_assoc_2	1	1	1	1	1
PF00889	EF_TS	2	1	1	1	1
PF00008	EGF	2	0	5	10	8
PF07974	EGF_2	20	11	26	24	22
PF18720	EGF_Tenascin	0	0	1	2	2
PF16880	EHD_N	3	3	2	2	2
PF06441	EHN	6	2	3	4	1
PF07264	EI24	4	5	3	3	3
PF01176	eIF-1a	2	2	3	3	3
PF05470	eIF-3c_N	2	1	1	1	1
PF05091	eIF-3_zeta	2	1	1	1	1
PF01287	eIF-5a	3	1	1	1	1
PF01873	eIF-5_eIF-2B	6	2	2	2	2
PF01912	eIF-6	1	1	1	1	1
PF08662	eIF2A	15	28	16	15	26
PF09173	eIF2_C	1	1	1	1	1
PF12353	eIF3g	2	1	2	3	1
PF18005	eIF3m_C_helix	1	1	0	0	1
PF09440	eIF3_N	1	1	1	1	1
PF12807	eIF3_p135	3	1	4	1	2
PF08597	eIF3_subunit	1	1	1	1	1
PF07541	EIF_2_alpha	2	1	1	1	1
PF05129	Elf1	1	1	1	1	1
PF00208	ELFV_dehydrog	6	8	7	6	8
PF02812	ELFV_dehydrog_N	5	5	5	5	5
PF04727	ELMO_CED12	4	2	5	5	1
PF01151	ELO	7	4	6	4	6
PF06881	Elongin_A	1	1	1	0	1
PF16505	Emaravirus_P4	0	0	0	0	1
PF07774	EMC1_C	1	1	1	1	1
PF01956	EMC3_TMCO1	1	1	2	1	1
PF03587	EMG1	2	1	1	1	1
PF01105	EMP24_GP25L	6	4	4	4	5
PF02990	EMP70	7	4	4	4	5
PF04231	Endonuclease_1	6	0	0	0	3
PF04493	Endonuclease_5	2	1	1	1	1
PF01223	Endonuclease_NS	3	1	1	1	1
PF04667	Endosulfine	1	0	0	1	1
PF13864	Enkurin	3	0	3	3	4
PF00113	Enolase_C	1	2	1	2	3
PF18374	Enolase_like_N	0	0	0	0	1
PF03952	Enolase_N	1	2	3	3	3
PF01417	ENTH	2	3	3	3	3
PF10163	EnY2	0	1	0	1	1
PF07699	Ephrin_rec_like	21	0	17	10	21
PF01370	Epimerase	54	58	53	56	41
PF00275	EPSP_synthase	2	1	1	1	2
PF11838	ERAP1_C	1	3	2	2	2
PF12497	ERbeta_N	0	0	0	0	1
PF16203	ERCC3_RAD25_C	6	7	4	4	8
PF02732	ERCC4	2	3	2	2	2
PF03463	eRF1_1	3	2	3	2	2
PF03464	eRF1_2	7	2	2	2	3
PF03465	eRF1_3	5	2	2	2	3
PF01222	ERG4_ERG24	5	3	3	3	1
PF13850	ERGIC_N	4	5	4	3	3
PF04137	ERO1	1	1	1	1	1
PF07749	ERp29	3	1	0	0	3
PF00810	ER_lumen_recept	3	3	2	2	2
PF05871	ESCRT-II	2	2	1	1	1
PF10183	ESSS	1	1	1	1	1
PF10374	EST1	0	1	1	1	1
PF10373	EST1_DNA_bind	3	1	2	1	2
PF00756	Esterase	3	11	6	9	6
PF04716	ETC_C1_NDUFA5	0	1	1	1	1
PF01012	ETF	2	2	2	2	2
PF00766	ETF_alpha	1	1	1	1	1
PF05187	ETF_QO	1	1	1	1	1
PF04777	Evr1_Alr	10	2	3	4	4
PF02601	Exonuc_VII_L	0	0	1	0	1
PF10447	EXOSC1	1	1	1	1	1
PF03016	Exostosin	11	15	3	4	3
PF03372	Exo_endo_phos	31	30	20	23	22
PF03124	EXS	5	3	3	3	1
PF01267	F-actin_cap_A	5	1	1	1	1
PF00646	F-box	4	5	7	4	5
PF12937	F-box-like	10	5	6	9	5
PF03807	F420_oxidored	10	14	12	13	6
PF00754	F5_F8_type_C	1	1	2	2	3
PF01557	FAA_hydrolase	6	3	3	4	5
PF09298	FAA_hydrolase_N	2	1	1	1	1
PF14826	FACT-Spt16_Nlob	1	1	1	1	1
PF02913	FAD-oxidase_C	4	3	3	3	2
PF00667	FAD_binding_1	5	6	4	5	5
PF00890	FAD_binding_2	53	48	46	39	42
PF01494	FAD_binding_3	28	30	33	28	25
PF01565	FAD_binding_4	10	9	7	7	5
PF00970	FAD_binding_6	14	16	8	8	13
PF03441	FAD_binding_7	2	3	2	2	2
PF08022	FAD_binding_8	7	11	4	6	5
PF08021	FAD_binding_9	0	1	0	0	1
PF12831	FAD_oxidored	31	25	30	26	28
PF06905	FAIM1	1	1	1	1	1
PF14886	FAM183	3	0	1	1	2
PF15665	FAM184	0	0	5	0	1
PF14977	FAM194	2	0	1	1	1
PF14753	FAM221	0	0	0	1	1
PF06730	FAM92	2	1	1	1	1
PF14631	FancD2	2	1	1	2	1
PF14680	FANCI_HD2	1	1	1	1	1
PF14675	FANCI_S1	1	1	1	1	1
PF14676	FANCI_S2	1	1	2	1	1
PF14678	FANCI_S4	1	1	1	1	1
PF11793	FANCL_C	6	1	2	3	6
PF16350	FAO_M	2	2	2	2	3
PF12018	FAP206	3	0	2	2	1
PF01149	Fapy_DNA_glyco	4	1	1	2	2
PF04750	Far-17a_AIG1	3	3	1	1	1
PF02469	Fasciclin	3	3	0	1	2
PF06743	FAST_1	1	1	0	0	1
PF18325	Fas_alpha_ACP	5	1	1	1	1
PF18314	FAS_I_H	2	1	1	1	1
PF17951	FAS_meander	0	1	0	0	1
PF02259	FAT	6	5	5	6	4
PF02260	FATC	4	6	6	5	6
PF00487	FA_desaturase	27	12	12	8	15
PF04116	FA_hydroxylase	27	28	15	14	9
PF05833	FbpA	3	2	1	3	2
PF00316	FBPase	3	2	2	3	2
PF04900	Fcf1	1	1	1	1	1
PF08698	Fcf2	1	1	1	1	1
PF09532	FDF	1	0	1	1	1
PF03147	FDX-ACB	1	1	1	1	1
PF00465	Fe-ADH	6	5	5	4	4
PF13685	Fe-ADH_2	6	5	4	3	4
PF01521	Fe-S_biosyn	2	2	2	2	1
PF07692	Fea1	2	0	0	0	1
PF02421	FeoB_N	15	18	13	14	16
PF00111	Fer2	4	4	3	3	4
PF13085	Fer2_3	2	1	1	1	1
PF04324	Fer2_BFD	3	3	2	2	3
PF00037	Fer4	2	1	2	2	1
PF13237	Fer4_10	2	2	2	2	2
PF13353	Fer4_12	3	2	2	2	2
PF13394	Fer4_14	2	1	2	2	2
PF13484	Fer4_16	1	1	1	1	1
PF13534	Fer4_17	1	2	2	2	2
PF12797	Fer4_2	1	1	1	1	1
PF14691	Fer4_20	2	2	2	2	2
PF14697	Fer4_21	1	1	1	1	1
PF12800	Fer4_4	0	1	1	1	1
PF12837	Fer4_6	2	1	1	1	1
PF12838	Fer4_7	1	1	2	2	1
PF13183	Fer4_8	2	2	2	2	2
PF13187	Fer4_9	1	1	2	1	1
PF00142	Fer4_NifH	4	3	5	5	5
PF08151	FerI	0	0	2	1	2
PF00373	FERM_M	4	4	5	4	3
PF01794	Ferric_reduct	7	8	5	7	4
PF00762	Ferrochelatase	1	1	1	1	1
PF08609	Fes1	1	1	1	0	1
PF01883	FeS_assembly_P	2	2	1	2	1
PF06818	Fez1	2	0	1	2	1
PF02906	Fe_hyd_lg_C	1	1	1	1	1
PF02256	Fe_hyd_SSU	1	0	1	1	1
PF01846	FF	1	2	2	2	1
PF01839	FG-GAP	0	1	9	3	2
PF14312	FG-GAP_2	34	21	29	2	2
PF18072	FGAR-AT_linker	2	1	2	1	1
PF18076	FGAR-AT_N	1	1	1	1	1
PF05013	FGase	2	3	2	2	1
PF03781	FGE-sulfatase	4	3	3	3	3
PF02782	FGGY_C	9	6	6	5	4
PF00370	FGGY_N	6	5	5	5	4
PF02181	FH2	11	4	7	7	7
PF00498	FHA	26	11	22	19	12
PF05427	FIBP	1	1	1	1	1
PF01269	Fibrillarin	2	1	2	2	2
PF08702	Fib_alpha	0	1	1	1	1
PF00038	Filament	4	0	3	2	1
PF00630	Filamin	9	1	5	5	4
PF14853	Fis1_TPR_C	8	6	13	9	11
PF00254	FKBP_C	19	19	14	16	16
PF01346	FKBP_N	3	2	1	1	1
PF05377	FlaC_arch	0	0	0	1	1
PF01613	Flavin_Reduct	3	1	1	1	1
PF00258	Flavodoxin_1	8	6	6	9	7
PF02525	Flavodoxin_2	4	1	4	5	4
PF01687	Flavokinase	1	1	1	1	1
PF02441	Flavoprotein	5	1	1	1	1
PF05130	FlgN	0	0	0	1	1
PF15975	Flot	0	1	2	2	1
PF09766	FmiP_Thoc5	1	2	1	1	1
PF01070	FMN_dh	14	16	11	8	12
PF03358	FMN_red	6	4	5	6	3
PF00743	FMO-like	9	16	13	10	7
PF00041	fn3	22	9	15	14	10
PF14310	Fn3-like	2	3	2	1	2
PF16893	fn3_2	0	0	0	0	1
PF06280	fn3_5	0	0	0	0	1
PF01770	Folate_carrier	1	1	1	1	1
PF03024	Folate_rec	7	2	2	3	1
PF09398	FOP_dimer	2	1	1	2	3
PF13865	FoP_duplication	2	1	1	1	2
PF00250	Forkhead	1	1	2	2	1
PF02911	Formyl_trans_C	1	1	0	1	1
PF00551	Formyl_trans_N	2	3	1	2	1
PF01226	Form_Nir_trans	2	2	4	3	1
PF09758	FPL	1	1	1	1	1
PF06963	FPN1	2	2	2	2	1
PF05911	FPP	0	1	1	1	2
PF08445	FR47	11	13	7	6	10
PF10277	Frag1	4	2	2	3	3
PF05994	FragX_IP	1	1	0	1	1
PF14407	Frankia_peptide	0	0	0	0	1
PF01491	Frataxin_Cyay	2	1	2	2	1
PF08771	FRB_dom	3	2	2	2	2
PF08867	FRG	1	0	1	1	1
PF06229	FRG1	0	0	0	0	1
PF02434	Fringe	2	3	0	0	2
PF01534	Frizzled	6	0	3	2	2
PF11768	Frtz	0	2	0	0	9
PF03881	Fructosamin_kin	0	1	1	1	1
PF03959	FSH1	6	8	8	6	7
PF15554	FSIP1	0	0	0	1	1
PF13095	FTA2	0	6	2	5	4
PF13093	FTA4	0	0	0	0	1
PF04961	FTCD_C	3	1	1	1	1
PF07837	FTCD_N	1	0	1	1	1
PF01268	FTHFS	5	2	2	2	2
PF12934	FTO_CTD	1	1	0	0	1
PF12933	FTO_NTD	1	1	0	0	1
PF03239	FTR1	7	2	1	1	2
PF06480	FtsH_ext	2	1	1	1	1
PF01728	FtsJ	14	13	9	10	7
PF01580	FtsK_SpoIIIE	2	3	1	3	6
PF07959	Fucokinase	1	3	1	2	2
PF10415	FumaraseC_C	2	2	1	1	2
PF03630	Fumble	3	2	2	2	2
PF05681	Fumerase	1	1	1	1	1
PF05683	Fumerase_C	1	1	1	1	1
PF04930	FUN14	2	2	2	2	2
PF04632	FUSC	3	1	1	0	1
PF13515	FUSC_2	2	3	1	2	1
PF05965	FYRC	2	2	1	0	1
PF05964	FYRN	2	3	2	0	1
PF01363	FYVE	18	11	15	16	15
PF02318	FYVE_2	0	2	1	2	1
PF01392	Fz	5	1	5	5	2
PF18060	F_actin_bund_C	8	2	5	5	4
PF01115	F_actin_cap_B	1	1	1	1	1
PF01116	F_bP_aldolase	2	1	0	0	1
PF00503	G-alpha	38	44	30	31	30
PF00631	G-gamma	0	0	2	2	2
PF01585	G-patch	2	4	3	3	3
PF12656	G-patch_2	4	4	3	3	2
PF01125	G10	1	1	1	1	1
PF02781	G6PD_C	5	5	3	3	3
PF00479	G6PD_N	4	5	3	3	3
PF10162	G8	3	0	5	2	2
PF04114	Gaa1	1	1	1	1	1
PF01590	GAF	14	3	10	10	10
PF13185	GAF_2	9	3	7	9	7
PF13492	GAF_3	5	3	7	5	3
PF00337	Gal-bind_lectin	1	1	1	1	1
PF01762	Galactosyl_T	7	6	1	0	2
PF10509	GalKase_gal_bdg	3	1	1	3	3
PF13802	Gal_mutarotas_2	5	3	2	2	2
PF01071	GARS_A	6	6	6	4	6
PF02843	GARS_C	2	2	1	1	2
PF02844	GARS_N	1	2	1	1	2
PF13851	GAS	3	1	4	4	4
PF03127	GAT	1	1	1	1	1
PF00117	GATase	11	11	8	9	10
PF00310	GATase_2	3	2	2	2	2
PF07685	GATase_3	5	3	1	2	4
PF13230	GATase_4	3	3	4	4	3
PF13507	GATase_5	2	1	1	1	1
PF13522	GATase_6	8	7	6	6	6
PF13537	GATase_7	6	5	4	5	5
PF02934	GatB_N	1	1	1	1	1
PF02637	GatB_Yqey	1	1	1	1	1
PF07670	Gate	1	1	0	0	1
PF04572	Gb3_synth	1	2	1	1	1
PF02263	GBP	9	4	5	2	2
PF02841	GBP_C	2	1	2	2	1
PF04189	Gcd10p	2	0	1	1	1
PF08704	GCD14	1	4	3	2	2
PF13324	GCIP	1	1	1	1	1
PF04130	GCP_C_terminal	7	4	5	5	2
PF17681	GCP_N_terminal	5	3	5	4	2
PF03074	GCS	2	1	1	1	1
PF01597	GCV_H	3	1	3	3	1
PF01571	GCV_T	5	4	4	4	5
PF08669	GCV_T_C	4	3	3	3	5
PF02347	GDC-P	2	1	2	1	2
PF00996	GDI	9	3	3	3	2
PF03009	GDPD	10	3	3	3	2
PF13653	GDPD_2	1	1	1	2	1
PF16363	GDP_Man_Dehyd	28	31	26	30	16
PF04295	GD_AH_C	3	0	0	0	1
PF16529	Ge1_WD40	26	21	28	33	61
PF02212	GED	2	1	1	1	1
PF00626	Gelsolin	10	9	5	5	6
PF06372	Gemin6	2	1	0	1	1
PF01708	Gemini_mov	0	0	0	0	1
PF17898	GerD	0	1	0	0	1
PF04828	GFA	7	3	2	2	4
PF01408	GFO_IDH_MocA	7	8	5	4	5
PF06094	GGACT	4	7	3	3	2
PF00990	GGDEF	0	0	0	0	1
PF14741	GH114_assoc	9	0	2	2	1
PF08544	GHMP_kinases_C	6	4	4	5	4
PF00288	GHMP_kinases_N	9	6	7	8	8
PF01134	GIDA	21	30	18	20	19
PF11710	Git3	0	2	0	0	2
PF11397	GlcNAc	9	5	5	6	8
PF07817	GLE1	1	1	1	1	1
PF10528	GLEYA	1	0	1	0	1
PF03275	GLF	2	1	2	2	3
PF00120	Gln-synt_C	6	4	6	6	6
PF18318	Gln-synt_C-ter	1	0	1	1	1
PF03951	Gln-synt_N	2	2	4	3	4
PF00042	Globin	2	1	1	1	1
PF08718	GLTP	8	2	1	1	1
PF03616	Glt_symporter	1	0	3	1	1
PF01182	Glucosamine_iso	6	2	2	3	3
PF04960	Glutaminase	2	1	1	1	2
PF00462	Glutaredoxin	22	12	11	11	8
PF00745	GlutR_dimer	0	0	0	0	1
PF05096	Glu_cyclase_2	2	2	2	2	1
PF16912	Glu_dehyd_C	2	4	4	2	2
PF01645	Glu_synthase	7	8	4	4	6
PF04898	Glu_syn_central	3	2	2	2	2
PF13488	Gly-zipper_Omp	10	8	0	3	1
PF14845	Glycohydro_20b2	1	2	3	1	2
PF00274	Glycolytic	1	0	1	1	1
PF00534	Glycos_transf_1	13	12	12	10	6
PF00535	Glycos_transf_2	12	7	6	6	3
PF00591	Glycos_transf_3	4	2	3	3	3
PF00953	Glycos_transf_4	1	1	1	1	1
PF02885	Glycos_trans_3N	3	2	3	3	3
PF17677	Glyco_hydro38C2	1	1	3	1	1
PF00232	Glyco_hydro_1	4	1	0	0	1
PF03537	Glyco_hydro_114	16	0	6	5	5
PF00722	Glyco_hydro_16	1	0	0	0	4
PF00704	Glyco_hydro_18	3	3	2	2	3
PF00703	Glyco_hydro_2	2	3	1	0	1
PF00728	Glyco_hydro_20	2	3	3	3	2
PF02838	Glyco_hydro_20b	1	3	3	2	2
PF02836	Glyco_hydro_2_C	2	4	2	0	1
PF02837	Glyco_hydro_2_N	2	2	1	0	1
PF00933	Glyco_hydro_3	5	3	3	3	4
PF17189	Glyco_hydro_30C	1	0	0	0	1
PF01055	Glyco_hydro_31	15	5	5	6	4
PF01301	Glyco_hydro_35	2	1	0	0	3
PF07748	Glyco_hydro_38C	3	2	3	2	2
PF01074	Glyco_hydro_38N	4	2	3	2	2
PF01915	Glyco_hydro_3_C	5	3	3	3	4
PF02449	Glyco_hydro_42	2	1	0	0	1
PF01532	Glyco_hydro_47	8	4	3	3	3
PF02057	Glyco_hydro_59	2	1	1	1	1
PF17387	Glyco_hydro_59M	2	1	1	1	1
PF18564	Glyco_hydro_5_C	4	3	3	2	3
PF03443	Glyco_hydro_61	8	0	0	0	2
PF03648	Glyco_hydro_67N	0	0	0	1	1
PF03644	Glyco_hydro_85	1	1	0	0	1
PF07971	Glyco_hydro_92	3	0	3	4	3
PF17678	Glyco_hydro_92N	1	0	3	4	2
PF17451	Glyco_hyd_101C	0	2	1	2	3
PF10111	Glyco_tranf_2_2	0	3	1	2	1
PF13641	Glyco_tranf_2_3	7	5	4	4	3
PF13704	Glyco_tranf_2_4	0	3	1	1	2
PF00852	Glyco_transf_10	5	4	4	5	3
PF01793	Glyco_transf_15	1	0	0	1	1
PF00982	Glyco_transf_20	5	6	3	3	3
PF03901	Glyco_transf_22	8	4	4	4	4
PF18404	Glyco_transf_24	2	3	1	1	1
PF01755	Glyco_transf_25	2	3	1	5	2
PF03033	Glyco_transf_28	10	6	9	9	4
PF05637	Glyco_transf_34	10	3	5	2	1
PF13439	Glyco_transf_4	5	6	3	5	3
PF13844	Glyco_transf_41	7	2	4	4	4
PF13896	Glyco_transf_49	4	2	3	2	1
PF08323	Glyco_transf_5	1	0	0	0	1
PF04666	Glyco_transf_54	2	1	2	2	1
PF02709	Glyco_transf_7C	5	1	1	1	1
PF13733	Glyco_transf_7N	5	1	1	1	1
PF01501	Glyco_transf_8	4	7	8	3	3
PF05686	Glyco_transf_90	4	4	3	4	2
PF01697	Glyco_transf_92	4	8	1	2	3
PF13524	Glyco_trans_1_2	3	5	5	4	2
PF13692	Glyco_trans_1_4	16	10	11	10	7
PF13579	Glyco_trans_4_4	3	3	3	3	2
PF04101	Glyco_tran_28_C	2	4	2	5	3
PF00903	Glyoxalase	8	10	8	7	4
PF13468	Glyoxalase_3	1	1	4	3	2
PF13669	Glyoxalase_4	3	6	4	5	2
PF18029	Glyoxalase_6	2	1	5	3	2
PF04488	Gly_transf_sug	6	7	10	7	6
PF10647	Gmad1	1	0	2	0	4
PF05199	GMC_oxred_C	5	6	11	9	5
PF00732	GMC_oxred_N	7	6	11	9	5
PF05351	GMP_PDE_delta	3	0	2	2	2
PF00958	GMP_synt_C	1	2	1	1	1
PF08701	GN3L_Grn1	1	1	1	1	1
PF13718	GNAT_acetyltr_2	2	2	1	1	1
PF03071	GNT-I	5	3	3	3	5
PF13897	GOLD_2	0	1	2	2	2
PF09787	Golgin_A5	2	1	2	1	5
PF04178	Got1	5	5	4	4	4
PF10192	GpcrRhopsn4	9	3	7	7	5
PF16905	GPHH	1	0	2	1	1
PF12537	GPHR_N	1	1	0	1	1
PF05024	Gpi1	2	1	1	1	1
PF04113	Gpi16	2	1	1	1	1
PF06432	GPI2	1	1	1	1	1
PF11970	GPR_Gpa2_C	0	0	0	0	1
PF01825	GPS	2	4	2	1	1
PF02800	Gp_dh_C	6	4	5	5	4
PF00044	Gp_dh_N	5	3	4	4	4
PF02893	GRAM	0	1	2	2	1
PF04495	GRASP55_65	3	1	2	2	2
PF07173	GRDP-like	0	4	0	0	1
PF06212	GRIM-19	1	1	1	1	1
PF01465	GRIP	3	1	3	2	2
PF07172	GRP	0	0	0	1	1
PF01025	GrpE	1	2	2	1	3
PF12742	Gryzun-like	0	0	0	1	1
PF00255	GSHPx	5	4	4	3	2
PF03199	GSH_synthase	1	1	1	1	1
PF03917	GSH_synth_ATP	1	1	1	1	1
PF12437	GSIII_N	1	0	1	1	1
PF12019	GspH	0	0	0	0	1
PF00043	GST_C	24	25	22	19	19
PF13410	GST_C_2	25	33	20	15	21
PF14497	GST_C_3	23	29	17	14	19
PF16865	GST_C_5	4	3	3	2	2
PF17171	GST_C_6	3	6	5	3	2
PF02798	GST_N	26	25	12	17	18
PF13409	GST_N_2	25	29	13	19	15
PF13417	GST_N_3	33	33	19	19	23
PF17172	GST_N_4	6	4	4	7	3
PF09594	GT87	1	0	1	1	1
PF01018	GTP1_OBG	1	1	1	1	1
PF12471	GTP_CH_N	2	1	1	1	1
PF00925	GTP_cyclohydro2	3	2	2	2	2
PF01227	GTP_cyclohydroI	1	1	1	1	1
PF00009	GTP_EFTU	58	48	42	47	44
PF03144	GTP_EFTU_D2	13	13	14	13	14
PF03143	GTP_EFTU_D3	5	5	4	4	4
PF14578	GTP_EFTU_D4	1	1	1	2	2
PF04670	Gtr1_RagA	29	50	40	41	35
PF00211	Guanylate_cyc	26	15	19	21	17
PF09778	Guanylate_cyc_2	1	1	1	1	1
PF00625	Guanylate_kin	2	3	2	2	3
PF08152	GUCT	1	1	1	1	1
PF06423	GWT1	1	2	0	1	1
PF01493	GXGXG	3	2	2	2	2
PF14323	GxGYxYP_C	1	1	2	2	1
PF02213	GYF	8	5	7	4	3
PF14237	GYF_2	7	8	8	4	4
PF06445	GyrI-like	0	1	1	1	1
PF01019	G_glu_transpept	1	1	1	1	1
PF03883	H2O2_YaaD	1	1	1	1	1
PF06831	H2TH	4	1	1	2	2
PF04408	HA2	13	11	12	12	9
PF04774	HABP4_PAI-RBP1	1	0	1	2	1
PF12710	HAD	6	10	6	6	8
PF13419	HAD_2	13	17	9	11	11
PF03928	Haem_degrading	0	1	1	1	1
PF16123	HAGH_C	2	2	3	3	2
PF02183	HALZ	3	1	3	1	2
PF01725	Ham1p_like	2	1	1	3	1
PF09110	HAND	4	1	1	1	1
PF04849	HAP1_N	4	0	3	0	1
PF09378	HAS-barrel	1	1	1	1	1
PF12330	Haspin_kinase	8	20	18	29	16
PF02184	HAT	1	1	1	1	1
PF02518	HATPase_c	29	19	27	26	24
PF13589	HATPase_c_3	13	12	10	11	9
PF08214	HAT_KAT11	3	3	4	4	3
PF14661	HAUS6_N	1	0	1	0	1
PF06777	HBB	1	1	1	1	2
PF07382	HC2	0	1	0	0	2
PF01966	HD	7	8	4	5	4
PF11496	HDA2-3	3	6	5	6	8
PF08668	HDOD	0	0	0	0	1
PF12917	HD_2	1	1	1	1	1
PF13023	HD_3	1	1	1	1	1
PF02985	HEAT	58	41	48	50	46
PF13646	HEAT_2	58	39	49	53	50
PF13513	HEAT_EZ	31	33	36	40	36
PF03130	HEAT_PBS	5	4	1	2	3
PF18817	HEAT_UF	0	0	0	0	1
PF00632	HECT	30	17	23	20	20
PF09814	HECT_2	0	1	1	1	1
PF12949	HeH	0	0	1	2	1
PF00271	Helicase_C	108	76	81	82	80
PF13307	Helicase_C_2	4	4	5	5	5
PF13625	Helicase_C_3	3	2	2	2	3
PF13871	Helicase_C_4	2	1	1	1	2
PF18149	Helicase_PWI	0	2	1	0	1
PF05127	Helicase_RecD	4	1	4	3	2
PF03451	HELP	4	1	4	3	1
PF01814	Hemerythrin	3	2	2	3	1
PF01126	Heme_oxygenase	2	1	2	2	1
PF03121	Herpes_UL52	1	0	1	1	1
PF04534	Herpes_UL56	0	0	0	0	1
PF05459	Herpes_UL69	0	0	0	0	1
PF00132	Hexapep	12	9	9	10	10
PF14602	Hexapep_2	5	3	3	6	7
PF00349	Hexokinase_1	1	1	1	1	2
PF03727	Hexokinase_2	1	1	1	1	2
PF04209	HgmA	2	1	1	1	1
PF03129	HGTP_anticodon	13	8	9	9	8
PF00633	HHH	2	2	3	2	4
PF00730	HhH-GPD	4	5	4	5	5
PF12826	HHH_2	0	3	1	4	1
PF12836	HHH_3	1	0	1	0	1
PF14520	HHH_5	2	2	2	2	1
PF14635	HHH_7	3	1	1	1	1
PF14716	HHH_8	3	1	3	2	3
PF17674	HHH_9	0	0	0	0	1
PF03486	HI0933_like	15	30	34	27	27
PF15919	HicB_lk_antitox	0	1	2	0	2
PF12722	Hid1	1	1	1	1	1
PF04588	HIG_1_N	1	1	2	2	2
PF01634	HisG	7	1	1	1	1
PF08029	HisG_C	7	1	1	1	1
PF00512	HisKA	9	3	8	8	6
PF00815	Histidinol_dh	1	1	1	1	1
PF00125	Histone	15	24	15	20	32
PF16211	Histone_H2A_C	2	5	3	4	5
PF00850	Hist_deacetyl	22	14	12	12	13
PF00977	His_biosynth	9	6	4	8	6
PF00300	His_Phos_1	37	22	22	23	23
PF00328	His_Phos_2	8	8	6	7	5
PF01230	HIT	8	5	6	5	4
PF02110	HK	0	0	0	0	1
PF00010	HLH	13	4	6	6	6
PF03006	HlyIII	1	4	1	1	1
PF00403	HMA	8	4	6	6	5
PF00368	HMG-CoA_red	3	2	1	2	2
PF00682	HMGL-like	5	4	5	5	3
PF00505	HMG_box	13	9	9	8	15
PF09011	HMG_box_2	14	9	8	7	15
PF08540	HMG_CoA_synt_C	2	2	1	1	1
PF01154	HMG_CoA_synt_N	2	2	1	1	1
PF15908	HMMR_C	0	0	1	0	2
PF01844	HNH	1	1	2	2	1
PF14279	HNH_5	0	0	1	1	1
PF18360	hnRNP_Q_AcD	4	3	3	2	1
PF14515	HOASN	0	1	0	0	1
PF05920	Homeobox_KN	2	4	3	3	4
PF00046	Homeodomain	3	4	4	4	4
PF00742	Homoserine_dh	1	2	1	1	1
PF05622	HOOK	5	2	4	5	2
PF02301	HORMA	1	2	2	3	1
PF03328	HpcH_HpaI	2	5	3	3	5
PF04982	HPP	1	1	1	1	1
PF01288	HPPK	0	1	1	1	1
PF07475	Hpr_kinase_C	0	0	1	1	2
PF01627	Hpt	2	1	1	1	1
PF00570	HRDC	2	2	4	3	1
PF09613	HrpB1_HrpK	1	2	1	1	4
PF09486	HrpB7	0	1	2	0	1
PF07529	HSA	0	1	2	1	2
PF06825	HSBP1	2	1	2	1	1
PF07743	HSCB_C	1	1	1	1	1
PF00447	HSF_DNA-bind	4	6	3	3	4
PF00011	HSP20	3	3	3	2	4
PF00012	HSP70	35	12	9	10	11
PF00183	HSP90	10	3	3	3	3
PF13413	HTH_25	0	1	0	0	1
PF13518	HTH_28	0	0	0	0	1
PF01381	HTH_3	2	1	1	1	1
PF13560	HTH_31	2	1	1	1	1
PF13592	HTH_33	0	0	0	0	1
PF13936	HTH_38	0	0	0	0	1
PF14641	HTH_44	1	1	1	1	1
PF08221	HTH_9	1	1	1	1	1
PF13022	HTH_Tnp_1_2	0	0	0	0	1
PF18289	HU-CCDC81_euk_2	1	0	2	1	1
PF04005	Hus1	4	1	1	2	3
PF07449	HyaE	0	2	0	1	1
PF01968	Hydantoinase_A	2	1	2	1	1
PF02538	Hydantoinase_B	1	1	1	1	1
PF05378	Hydant_A_N	1	1	1	1	1
PF17213	Hydin_ADK	0	3	1	1	2
PF00702	Hydrolase	44	33	28	31	34
PF08282	Hydrolase_3	12	21	9	11	14
PF12146	Hydrolase_4	72	83	52	58	56
PF13344	Hydrolase_6	4	5	4	4	5
PF13242	Hydrolase_like	11	12	10	10	9
PF18582	HZS_alpha	0	0	0	0	1
PF03030	H_PPase	11	5	4	4	4
PF01749	IBB	3	2	3	2	2
PF03810	IBN_N	11	9	7	7	9
PF01485	IBR	11	4	2	3	4
PF00463	ICL	1	2	2	2	1
PF04140	ICMT	1	3	2	1	3
PF01231	IDO	2	3	2	2	1
PF11987	IF-2	2	2	2	2	2
PF01008	IF-2B	7	4	4	4	4
PF04760	IF2_N	0	0	0	0	1
PF00707	IF3_C	2	1	2	1	1
PF05198	IF3_N	2	1	1	1	1
PF01652	IF4E	4	2	2	2	2
PF05004	IFRD	3	2	1	3	2
PF14931	IFT20	1	0	1	1	1
PF15305	IFT43	1	0	1	1	1
PF12317	IFT46_B_C	1	0	1	1	1
PF10498	IFT57	2	0	4	2	1
PF00475	IGPD	2	1	1	1	1
PF00218	IGPS	1	2	1	1	1
PF09597	IGR	0	4	0	0	1
PF17753	Ig_mannosidase	0	1	0	0	1
PF04762	IKI3	0	2	2	2	4
PF01450	IlvC	1	1	1	1	1
PF00920	ILVD_EDD	2	1	1	2	1
PF07991	IlvN	1	4	2	2	2
PF12257	IML1	2	1	1	1	1
PF18591	IMP2_C	1	1	1	3	1
PF18590	IMP2_N	5	5	5	5	3
PF00478	IMPDH	20	21	13	11	15
PF00817	IMS	7	5	5	4	4
PF11799	IMS_C	4	5	3	2	1
PF03941	INCENP_ARK-bind	1	1	1	1	1
PF04227	Indigoidine_A	2	1	1	1	1
PF12998	ING	1	1	2	1	1
PF08246	Inhibitor_I29	4	2	3	3	3
PF04179	Init_tRNA_PT	0	3	0	1	1
PF01658	Inos-1-P_synth	2	1	1	1	1
PF00459	Inositol_P	6	3	4	4	3
PF06090	Ins_P5_2-kin	1	1	1	1	1
PF18785	Inv-AAD	1	1	1	1	1
PF09134	Invasin_D3	3	1	3	1	1
PF00520	Ion_trans	64	17	64	62	49
PF07885	Ion_trans_2	19	11	31	37	33
PF06415	iPGM_N	1	1	1	1	1
PF03770	IPK	2	2	2	2	2
PF04979	IPP-2	2	2	2	1	1
PF01715	IPPT	1	1	1	1	2
PF01745	IPT	1	1	1	1	1
PF00612	IQ	38	8	59	65	23
PF10401	IRF-3	0	0	0	0	1
PF01007	IRK	5	3	2	3	3
PF17655	IRK_C	8	5	4	4	3
PF00857	Isochorismatase	5	5	3	3	4
PF00180	Iso_dh	3	3	3	3	3
PF03398	Ist1	2	6	1	1	2
PF01695	IstB_IS21	12	22	18	19	19
PF06246	Isy1	1	1	1	1	1
PF15907	Itfg2	2	1	2	2	2
PF01156	IU_nuc_hydro	4	3	1	1	1
PF01398	JAB	9	10	7	7	8
PF01419	Jacalin	1	1	3	3	2
PF05571	JAMP	1	0	0	0	1
PF02373	JmjC	13	17	15	17	9
PF02375	JmjN	1	2	2	2	2
PF02099	Josephin	3	1	1	1	1
PF05804	KAP	5	1	4	4	4
PF07693	KAP_NTPase	0	0	0	1	2
PF14662	KASH_CCD	2	1	5	4	3
PF16197	KAsynt_C_assoc	7	3	3	3	3
PF07648	Kazal_2	0	0	0	0	1
PF12309	KBP_C	1	1	1	1	1
PF06293	Kdo	31	50	50	73	55
PF01344	Kelch_1	25	9	17	16	12
PF07646	Kelch_2	24	10	15	14	12
PF13415	Kelch_3	30	10	17	15	13
PF13418	Kelch_4	28	10	19	17	14
PF13854	Kelch_5	31	10	19	16	12
PF13964	Kelch_6	27	10	18	16	14
PF00109	ketoacyl-synt	14	16	12	13	11
PF02801	Ketoacyl-synt_C	10	7	6	7	6
PF00013	KH_1	19	10	13	11	6
PF07650	KH_2	10	5	6	5	4
PF13083	KH_4	2	4	4	4	2
PF13184	KH_5	0	2	1	2	1
PF15985	KH_6	3	2	2	2	2
PF17903	KH_8	6	2	2	2	2
PF14714	KH_dom-like	1	1	1	1	1
PF13879	KIAA1430	7	0	5	7	5
PF12423	KIF1B	0	0	1	0	1
PF10357	Kin17_mid	1	1	1	1	1
PF14531	Kinase-like	81	119	113	157	123
PF03618	Kinase-PPPase	0	0	0	0	1
PF00225	Kinesin	85	24	66	66	63
PF16183	Kinesin_assoc	1	0	2	3	2
PF02172	KIX	0	0	0	0	1
PF16987	KIX_2	1	1	2	1	1
PF18131	KN17_SH3	1	2	1	2	2
PF00467	KOW	9	3	3	4	4
PF08659	KR	98	88	68	70	66
PF05178	Kri1	2	1	1	1	1
PF12936	Kri1_C	2	1	1	1	1
PF08433	KTI12	2	2	1	4	2
PF02735	Ku	2	2	2	2	1
PF03730	Ku_C	0	2	2	2	1
PF08785	Ku_PK_bind	1	1	1	1	1
PF13434	K_oxygenase	10	25	15	14	10
PF05047	L51_S25_CI-B8	2	2	2	3	2
PF05383	La	6	3	3	3	3
PF07578	LAB_N	0	1	0	1	2
PF00753	Lactamase_B	22	23	24	22	20
PF12706	Lactamase_B_2	17	23	21	23	20
PF13483	Lactamase_B_3	1	1	1	1	1
PF13691	Lactamase_B_4	1	0	2	1	1
PF16661	Lactamase_B_6	2	4	2	3	2
PF02652	Lactate_perm	1	0	0	0	1
PF10282	Lactonase	2	0	4	3	2
PF01306	LacY_symp	2	1	3	2	1
PF18603	LAL_C2	2	1	1	1	1
PF00052	Laminin_B	1	0	2	2	1
PF00053	Laminin_EGF	2	0	2	5	6
PF13385	Laminin_G_3	29	1	12	10	7
PF05609	LAP1C	0	0	0	0	1
PF09861	Lar_N	2	0	1	0	1
PF14354	Lar_restr_allev	0	0	0	0	1
PF04031	Las1	1	1	1	1	1
PF09465	LBR_tudor	5	2	5	11	6
PF02450	LCAT	5	2	2	2	4
PF04072	LCM	3	6	4	4	1
PF18306	LDcluster4	1	1	1	1	1
PF02866	Ldh_1_C	2	4	2	2	3
PF00056	Ldh_1_N	2	4	2	4	4
PF02615	Ldh_2	1	0	0	0	1
PF00057	Ldl_recept_a	0	0	0	0	1
PF02987	LEA_4	1	0	3	4	1
PF10714	LEA_6	0	0	0	0	2
PF15619	Lebercilin	1	1	3	1	1
PF00059	Lectin_C	16	7	3	3	10
PF03388	Lectin_leg-like	4	2	4	2	3
PF00139	Lectin_legB	9	1	10	7	4
PF04004	Leo1	1	1	1	1	1
PF06421	LepA_C	4	1	1	1	1
PF07766	LETM1	4	1	2	2	2
PF08502	LeuA_dimer	1	1	1	1	1
PF09127	Leuk-A4-hydro_C	1	1	1	1	1
PF03588	Leu_Phe_trans	1	1	1	1	1
PF15294	Leu_zip	2	1	1	1	1
PF16881	LIAS_N	2	1	1	1	1
PF10230	LIDHydrolase	1	2	2	3	1
PF16759	LIG3_BRCT	0	2	1	0	1
PF00549	Ligase_CoA	4	2	3	3	3
PF02900	LigB	1	1	1	1	2
PF00060	Lig_chan	2	4	2	3	3
PF00412	LIM	15	17	10	11	8
PF11608	Limkain-b1	0	1	0	3	1
PF00538	Linker_histone	4	3	3	1	2
PF01764	Lipase_3	34	30	28	27	26
PF00657	Lipase_GDSL	5	4	3	2	3
PF13472	Lipase_GDSL_2	14	9	5	5	10
PF08557	Lipid_DES	1	0	2	2	2
PF08212	Lipocalin_2	2	3	2	2	1
PF17186	Lipocalin_9	1	1	1	0	1
PF08513	LisH	2	3	2	2	1
PF16045	LisH_2	2	1	1	1	2
PF17814	LisH_TPL	0	0	1	1	1
PF04791	LMBR1	3	2	2	2	2
PF14421	LmjF365940-deam	2	1	1	1	1
PF18238	LnmK_N_HDF	0	0	0	0	1
PF08235	LNS2	2	2	2	2	2
PF13774	Longin	6	5	5	5	4
PF05362	Lon_C	5	2	2	2	2
PF02190	LON_substr_bdg	8	4	3	4	2
PF18850	LPD30	0	1	1	0	2
PF03067	LPMO_10	9	3	3	4	6
PF02684	LpxB	1	1	1	1	1
PF03331	LpxC	1	1	1	1	1
PF02606	LpxK	3	1	1	0	1
PF08263	LRRNT_2	0	0	0	0	1
PF00560	LRR_1	45	57	58	91	52
PF12799	LRR_4	108	110	132	167	95
PF13516	LRR_6	138	149	155	191	71
PF13855	LRR_8	82	68	98	114	74
PF14580	LRR_9	40	15	46	48	42
PF01423	LSM	16	16	17	18	16
PF12701	LSM14	1	1	2	1	1
PF06741	LsmAD	2	1	2	2	1
PF00677	Lum_binding	2	1	1	1	1
PF06814	Lung_7-TM_R	9	5	5	6	6
PF05893	LuxC	2	1	1	2	2
PF00206	Lyase_1	5	5	4	4	4
PF00221	Lyase_aromatic	4	0	1	1	1
PF05834	Lycopene_cycl	4	10	14	13	15
PF03641	Lysine_decarbox	1	1	1	1	1
PF01476	LysM	7	2	4	3	1
PF03466	LysR_substrate	0	0	0	0	1
PF18517	LZ3wCH	1	1	1	1	1
PF08367	M16C_assoc	1	2	1	1	1
PF07687	M20_dimer	10	6	6	8	9
PF02847	MA3	5	4	3	3	4
PF07476	MAAL_C	1	2	1	1	1
PF12464	Mac	0	0	1	0	1
PF09726	Macoilin	0	0	1	3	3
PF01661	Macro	5	4	5	6	3
PF05557	MAD	1	1	2	1	2
PF08311	Mad3_BUB1_I	1	15	3	1	2
PF10545	MADF_DNA_bdg	0	2	2	0	1
PF02545	Maf	2	2	2	2	2
PF09174	Maf1	2	1	1	1	1
PF14437	MafB19-deam	4	5	5	6	6
PF01454	MAGE	1	1	1	1	1
PF04112	Mak10	1	1	1	1	1
PF04874	Mak16	1	1	1	1	1
PF01274	Malate_synthase	3	1	2	2	1
PF00390	malic	3	2	2	2	2
PF03949	Malic_M	3	2	2	2	2
PF02330	MAM33	1	1	1	1	1
PF05007	Mannosyl_trans	2	1	1	1	1
PF11051	Mannosyl_trans3	2	0	1	0	2
PF01575	MaoC_dehydratas	9	6	5	4	5
PF13452	MaoC_dehydrat_N	1	0	2	2	1
PF03999	MAP65_ASE1	1	1	1	1	1
PF01124	MAPEG	9	8	5	4	2
PF08923	MAPKK1_Int	1	1	1	1	1
PF06391	MAT1	1	4	1	1	1
PF01554	MatE	9	8	7	6	6
PF00917	MATH	1	3	1	1	1
[truncated: 3,751 more rows]
