# Supplementary material for: Isolation and transcriptome analysis of a biotechnologically promising Black Sea protist, Thraustochytrium aureum ssp. strugatskii
Source: PeerJ. 2022 Mar 9;10:e12737. doi: 10.7717/peerj.12737 (PMC8917795; doi:10.7717/peerj.12737)
Supplement: Supplemental Information 5 [file peerj-10-12737-s005.xlsx]

## Sheet: GO
Gene Ontology ID	Gene Ontology name	Gene Ontology type	Number of predicted protein	% predicted protein
GO:0005488	binding	Molecular Function	4837	44.8
GO:0003824	catalytic activity	Molecular Function	4342	40.2
GO:0005515	protein binding	undefined	2403	22.2
GO:1901363	heterocyclic compound binding	undefined	1766	16.3
GO:0097159	organic cyclic compound binding	undefined	1766	16.3
GO:0016787	hydrolase activity	undefined	1701	15.7
GO:0043167	ion binding	undefined	1579	14.6
GO:0016740	transferase activity	undefined	1348	12.5
GO:0140096	catalytic activity, acting on a protein	undefined	1111	10.3
GO:0036094	small molecule binding	undefined	998	9.2
GO:0043168	anion binding	undefined	915	8.5
GO:1901265	nucleoside phosphate binding	undefined	912	8.4
GO:1901265	nucleoside phosphate binding	undefined	912	8.4
GO:0000166	nucleotide binding	undefined	912	8.4
GO:0000166	nucleotide binding	undefined	912	8.4
GO:0009987	cellular process	Biological Process	897	8.3
GO:0003676	nucleic acid binding	undefined	869	8.0
GO:0003676	nucleic acid binding	undefined	869	8.0
GO:0097367	carbohydrate derivative binding	undefined	742	6.9
GO:0016491	oxidoreductase activity	undefined	737	6.8
GO:0032553	ribonucleotide binding	undefined	730	6.8
GO:0032553	ribonucleotide binding	undefined	730	6.8
GO:0032553	ribonucleotide binding	undefined	730	6.8
GO:0017076	purine nucleotide binding	undefined	708	6.6
GO:0032555	purine ribonucleotide binding	undefined	705	6.5
GO:0008152	metabolic process	Biological Process	692	6.4
GO:0035639	purine ribonucleoside triphosphate binding	undefined	688	6.4
GO:0035639	purine ribonucleoside triphosphate binding	undefined	688	6.4
GO:0035639	purine ribonucleoside triphosphate binding	undefined	688	6.4
GO:0043169	cation binding	undefined	686	6.4
GO:0046872	metal ion binding	undefined	681	6.3
GO:0016817	hydrolase activity, acting on acid anhydrides	undefined	668	6.2
GO:0016818	hydrolase activity, acting on acid anhydrides, in phosphorus-containing anhydrides	undefined	659	6.1
GO:0016462	pyrophosphatase activity	undefined	659	6.1
GO:0016772	transferase activity, transferring phosphorus-containing groups	undefined	641	5.9
GO:0008144	drug binding	undefined	594	5.5
GO:0071704	organic substance metabolic process	undefined	583	5.4
GO:0044238	primary metabolic process	undefined	557	5.2
GO:0016301	kinase activity	undefined	552	5.1
GO:0032559	adenyl ribonucleotide binding	undefined	534	4.9
GO:0016773	phosphotransferase activity, alcohol group as acceptor	undefined	524	4.9
GO:0005524	ATP binding	undefined	517	4.8
GO:0005524	ATP binding	undefined	517	4.8
GO:0005524	ATP binding	undefined	517	4.8
GO:0005524	ATP binding	undefined	517	4.8
GO:0051179	localization	Biological Process	499	4.6
GO:0044237	cellular metabolic process	undefined	496	4.6
GO:0044237	cellular metabolic process	undefined	496	4.6
GO:0051234	establishment of localization	undefined	472	4.4
GO:0004672	protein kinase activity	undefined	470	4.4
GO:0004672	protein kinase activity	undefined	470	4.4
GO:0004672	protein kinase activity	undefined	470	4.4
GO:0006810	transport	undefined	470	4.4
GO:0006807	nitrogen compound metabolic process	undefined	462	4.3
GO:0005215	transporter activity	Molecular Function	435	4.0
GO:0008233	peptidase activity	undefined	427	4.0
GO:0008233	peptidase activity	undefined	427	4.0
GO:0043170	macromolecule metabolic process	undefined	413	3.8
GO:0070011	peptidase activity, acting on L-amino acid peptides	undefined	406	3.8
GO:0022857	transmembrane transporter activity	undefined	400	3.7
GO:0016020	membrane	Cellular Component	387	3.6
GO:0003677	DNA binding	undefined	338	3.1
GO:0016788	hydrolase activity, acting on ester bonds	undefined	314	2.9
GO:0044260	cellular macromolecule metabolic process	undefined	300	2.8
GO:0044260	cellular macromolecule metabolic process	undefined	300	2.8
GO:0044260	cellular macromolecule metabolic process	undefined	300	2.8
GO:0046483	heterocycle metabolic process	undefined	295	2.7
GO:1901360	organic cyclic compound metabolic process	undefined	295	2.7
GO:0046914	transition metal ion binding	undefined	294	2.7
GO:0034641	cellular nitrogen compound metabolic process	undefined	289	2.7
GO:0006725	cellular aromatic compound metabolic process	undefined	289	2.7
GO:0034641	cellular nitrogen compound metabolic process	undefined	289	2.7
GO:0006725	cellular aromatic compound metabolic process	undefined	289	2.7
GO:0015075	ion transmembrane transporter activity	undefined	284	2.6
GO:0003723	RNA binding	undefined	270	2.5
GO:0003723	RNA binding	undefined	270	2.5
GO:0006139	nucleobase-containing compound metabolic process	undefined	268	2.5
GO:0006139	nucleobase-containing compound metabolic process	undefined	268	2.5
GO:0006139	nucleobase-containing compound metabolic process	undefined	268	2.5
GO:0006139	nucleobase-containing compound metabolic process	undefined	268	2.5
GO:0006139	nucleobase-containing compound metabolic process	undefined	268	2.5
GO:0006139	nucleobase-containing compound metabolic process	undefined	268	2.5
GO:0015318	inorganic molecular entity transmembrane transporter activity	undefined	250	2.3
GO:0048037	cofactor binding	undefined	245	2.3
GO:0090304	nucleic acid metabolic process	undefined	239	2.2
GO:0090304	nucleic acid metabolic process	undefined	239	2.2
GO:0005198	structural molecule activity	Molecular Function	236	2.2
GO:0001882	nucleoside binding	undefined	233	2.2
GO:0001882	nucleoside binding	undefined	233	2.2
GO:0001882	nucleoside binding	undefined	233	2.2
GO:0001882	nucleoside binding	undefined	233	2.2
GO:0032549	ribonucleoside binding	undefined	232	2.1
GO:0032550	purine ribonucleoside binding	undefined	232	2.1
GO:0032549	ribonucleoside binding	undefined	232	2.1
GO:0032550	purine ribonucleoside binding	undefined	232	2.1
GO:0005525	GTP binding	undefined	232	2.1
GO:0032561	guanyl ribonucleotide binding	undefined	232	2.1
GO:0001883	purine nucleoside binding	undefined	232	2.1
GO:0032550	purine ribonucleoside binding	undefined	232	2.1
GO:0032549	ribonucleoside binding	undefined	232	2.1
GO:0032550	purine ribonucleoside binding	undefined	232	2.1
GO:0005509	calcium ion binding	undefined	226	2.1
GO:0071840	cellular component organization or biogenesis	Biological Process	223	2.1
GO:0055085	transmembrane transport	undefined	221	2.0
GO:0065007	biological regulation	Biological Process	220	2.0
GO:0050789	regulation of biological process	undefined	216	2.0
GO:0050789	regulation of biological process	Biological Process	216	2.0
GO:1901564	organonitrogen compound metabolic process	undefined	214	2.0
GO:1901564	organonitrogen compound metabolic process	undefined	214	2.0
GO:0050662	coenzyme binding	undefined	212	2.0
GO:0044425	membrane part	undefined	210	1.9
GO:0044425	membrane part	Cellular Component	210	1.9
GO:0004175	endopeptidase activity	undefined	207	1.9
GO:0044464	cell part	Cellular Component	206	1.9
GO:0005623	cell	Cellular Component	206	1.9
GO:0044464	cell part	undefined	206	1.9
GO:0010467	gene expression	undefined	202	1.9
GO:0050794	regulation of cellular process	undefined	202	1.9
GO:0050794	regulation of cellular process	undefined	202	1.9
GO:0050794	regulation of cellular process	undefined	202	1.9
GO:0031224	intrinsic component of membrane	undefined	194	1.8
GO:0031224	intrinsic component of membrane	undefined	194	1.8
GO:0016741	transferase activity, transferring one-carbon groups	undefined	193	1.8
GO:0003735	structural constituent of ribosome	undefined	192	1.8
GO:0016021	integral component of membrane	undefined	190	1.8
GO:0016021	integral component of membrane	undefined	190	1.8
GO:0008168	methyltransferase activity	undefined	184	1.7
GO:0016043	cellular component organization	undefined	184	1.7
GO:0016043	cellular component organization	undefined	184	1.7
GO:0140110	transcription regulator activity	Molecular Function	183	1.7
GO:0016070	RNA metabolic process	undefined	182	1.7
GO:0009058	biosynthetic process	undefined	182	1.7
GO:0044424	intracellular part	undefined	177	1.6
GO:0005622	intracellular	undefined	177	1.6
GO:0044424	intracellular part	undefined	177	1.6
GO:0008324	cation transmembrane transporter activity	undefined	167	1.5
GO:0044249	cellular biosynthetic process	undefined	167	1.5
GO:1901576	organic substance biosynthetic process	undefined	167	1.5
GO:0044249	cellular biosynthetic process	undefined	167	1.5
GO:1901576	organic substance biosynthetic process	undefined	167	1.5
GO:0044249	cellular biosynthetic process	undefined	167	1.5
GO:0019538	protein metabolic process	undefined	166	1.5
GO:0019538	protein metabolic process	undefined	166	1.5
GO:0019538	protein metabolic process	undefined	166	1.5
GO:0008236	serine-type peptidase activity	undefined	165	1.5
GO:0017171	serine hydrolase activity	undefined	165	1.5
GO:0008236	serine-type peptidase activity	undefined	165	1.5
GO:0016829	lyase activity	undefined	160	1.5
GO:0044267	cellular protein metabolic process	undefined	152	1.4
GO:0044267	cellular protein metabolic process	undefined	152	1.4
GO:0044267	cellular protein metabolic process	undefined	152	1.4
GO:0044267	cellular protein metabolic process	undefined	152	1.4
GO:0043412	macromolecule modification	undefined	150	1.4
GO:0043226	organelle	Cellular Component	148	1.4
GO:0043229	intracellular organelle	undefined	147	1.4
GO:0043229	intracellular organelle	undefined	147	1.4
GO:0043229	intracellular organelle	undefined	147	1.4
GO:0016746	transferase activity, transferring acyl groups	undefined	145	1.3
GO:0071702	organic substance transport	undefined	145	1.3
GO:0022890	inorganic cation transmembrane transporter activity	undefined	143	1.3
GO:0022890	inorganic cation transmembrane transporter activity	undefined	143	1.3
GO:0003700	DNA-binding transcription factor activity	undefined	139	1.3
GO:0016757	transferase activity, transferring glycosyl groups	undefined	137	1.3
GO:0071705	nitrogen compound transport	undefined	137	1.3
GO:0050896	response to stimulus	Biological Process	136	1.3
GO:0051641	cellular localization	undefined	133	1.2
GO:0033036	macromolecule localization	undefined	131	1.2
GO:0008104	protein localization	undefined	128	1.2
GO:0045184	establishment of protein localization	undefined	128	1.2
GO:0045184	establishment of protein localization	undefined	128	1.2
GO:0015031	protein transport	undefined	126	1.2
GO:0015031	protein transport	undefined	126	1.2
GO:0042886	amide transport	undefined	126	1.2
GO:0015833	peptide transport	undefined	126	1.2
GO:0034645	cellular macromolecule biosynthetic process	undefined	125	1.2
GO:0034645	cellular macromolecule biosynthetic process	undefined	125	1.2
GO:0034645	cellular macromolecule biosynthetic process	undefined	125	1.2
GO:0009059	macromolecule biosynthetic process	undefined	125	1.2
GO:0034645	cellular macromolecule biosynthetic process	undefined	125	1.2
GO:0009059	macromolecule biosynthetic process	undefined	125	1.2
GO:0034645	cellular macromolecule biosynthetic process	undefined	125	1.2
GO:0034645	cellular macromolecule biosynthetic process	undefined	125	1.2
GO:0034645	cellular macromolecule biosynthetic process	undefined	125	1.2
GO:0044085	cellular component biogenesis	undefined	123	1.1
GO:0042578	phosphoric ester hydrolase activity	undefined	122	1.1
GO:0051716	cellular response to stimulus	undefined	122	1.1
GO:0051716	cellular response to stimulus	undefined	122	1.1
GO:0006996	organelle organization	undefined	122	1.1
GO:0016614	oxidoreductase activity, acting on CH-OH group of donors	undefined	121	1.1
GO:0046907	intracellular transport	undefined	120	1.1
GO:0051649	establishment of localization in cell	undefined	120	1.1
GO:0046907	intracellular transport	undefined	120	1.1
GO:0046907	intracellular transport	undefined	120	1.1
GO:0051649	establishment of localization in cell	undefined	120	1.1
GO:0006464	cellular protein modification process	undefined	119	1.1
GO:0036211	protein modification process	undefined	119	1.1
GO:0036211	protein modification process	undefined	119	1.1
GO:0036211	protein modification process	undefined	119	1.1
GO:0006464	cellular protein modification process	undefined	119	1.1
GO:0006464	cellular protein modification process	undefined	119	1.1
GO:0043227	membrane-bounded organelle	undefined	117	1.1
GO:0098772	molecular function regulator	Molecular Function	117	1.1
GO:0018130	heterocycle biosynthetic process	undefined	114	1.1
GO:0018130	heterocycle biosynthetic process	undefined	114	1.1
GO:1901362	organic cyclic compound biosynthetic process	undefined	114	1.1
GO:0018130	heterocycle biosynthetic process	undefined	114	1.1
GO:1901362	organic cyclic compound biosynthetic process	undefined	114	1.1
GO:0018130	heterocycle biosynthetic process	undefined	114	1.1
GO:0043231	intracellular membrane-bounded organelle	undefined	113	1.0
GO:0043231	intracellular membrane-bounded organelle	undefined	113	1.0
GO:0043231	intracellular membrane-bounded organelle	undefined	113	1.0
GO:0043231	intracellular membrane-bounded organelle	undefined	113	1.0
GO:0008234	cysteine-type peptidase activity	undefined	113	1.0
GO:0019787	ubiquitin-like protein transferase activity	undefined	109	1.0
GO:0004842	ubiquitin-protein transferase activity	undefined	109	1.0
GO:0019787	ubiquitin-like protein transferase activity	undefined	109	1.0
GO:0004842	ubiquitin-protein transferase activity	undefined	109	1.0
GO:0034613	cellular protein localization	undefined	109	1.0
GO:0070727	cellular macromolecule localization	undefined	109	1.0
GO:0070727	cellular macromolecule localization	undefined	109	1.0
GO:0034613	cellular protein localization	undefined	109	1.0
GO:0016616	oxidoreductase activity, acting on the CH-OH group of donors, NAD or NADP as acceptor	undefined	108	1.0
GO:0006886	intracellular protein transport	undefined	107	1.0
GO:0006886	intracellular protein transport	undefined	107	1.0
GO:0006886	intracellular protein transport	undefined	107	1.0
GO:0006886	intracellular protein transport	undefined	107	1.0
GO:0006629	lipid metabolic process	undefined	105	1.0
GO:0006629	lipid metabolic process	undefined	105	1.0
GO:0016874	ligase activity	undefined	104	1.0
GO:0019438	aromatic compound biosynthetic process	undefined	103	1.0
GO:0019438	aromatic compound biosynthetic process	undefined	103	1.0
GO:0019438	aromatic compound biosynthetic process	undefined	103	1.0
GO:0019438	aromatic compound biosynthetic process	undefined	103	1.0
GO:0019438	aromatic compound biosynthetic process	undefined	103	1.0
GO:0008092	cytoskeletal protein binding	undefined	101	0.9
GO:0140098	catalytic activity, acting on RNA	undefined	99	0.9
GO:0004252	serine-type endopeptidase activity	undefined	97	0.9
GO:0044271	cellular nitrogen compound biosynthetic process	undefined	96	0.9
GO:0044271	cellular nitrogen compound biosynthetic process	undefined	96	0.9
GO:0044271	cellular nitrogen compound biosynthetic process	undefined	96	0.9
GO:0044271	cellular nitrogen compound biosynthetic process	undefined	96	0.9
GO:0022803	passive transmembrane transporter activity	undefined	94	0.9
GO:0015267	channel activity	undefined	94	0.9
GO:0016798	hydrolase activity, acting on glycosyl bonds	undefined	93	0.9
GO:0016853	isomerase activity	undefined	92	0.9
GO:0005216	ion channel activity	undefined	92	0.9
GO:0005216	ion channel activity	undefined	92	0.9
GO:0022838	substrate-specific channel activity	undefined	92	0.9
GO:0032991	protein-containing complex	Cellular Component	91	0.8
GO:0006396	RNA processing	undefined	91	0.8
GO:0007154	cell communication	undefined	91	0.8
GO:0016747	transferase activity, transferring acyl groups other than amino-acyl groups	undefined	90	0.8
GO:0034654	nucleobase-containing compound biosynthetic process	undefined	89	0.8
GO:0034654	nucleobase-containing compound biosynthetic process	undefined	89	0.8
GO:0034654	nucleobase-containing compound biosynthetic process	undefined	89	0.8
GO:0034654	nucleobase-containing compound biosynthetic process	undefined	89	0.8
GO:0034654	nucleobase-containing compound biosynthetic process	undefined	89	0.8
GO:0034654	nucleobase-containing compound biosynthetic process	undefined	89	0.8
GO:0034654	nucleobase-containing compound biosynthetic process	undefined	89	0.8
GO:0034654	nucleobase-containing compound biosynthetic process	undefined	89	0.8
GO:0034654	nucleobase-containing compound biosynthetic process	undefined	89	0.8
GO:0034654	nucleobase-containing compound biosynthetic process	undefined	89	0.8
GO:0034654	nucleobase-containing compound biosynthetic process	undefined	89	0.8
GO:0034654	nucleobase-containing compound biosynthetic process	undefined	89	0.8
GO:0034654	nucleobase-containing compound biosynthetic process	undefined	89	0.8
GO:0034654	nucleobase-containing compound biosynthetic process	undefined	89	0.8
GO:0034654	nucleobase-containing compound biosynthetic process	undefined	89	0.8
GO:0004553	hydrolase activity, hydrolyzing O-glycosyl compounds	undefined	86	0.8
GO:0140097	catalytic activity, acting on DNA	undefined	86	0.8
GO:0007165	signal transduction	undefined	85	0.8
GO:0007165	signal transduction	undefined	85	0.8
GO:0007165	signal transduction	undefined	85	0.8
GO:0007165	signal transduction	undefined	85	0.8
GO:0007165	signal transduction	undefined	85	0.8
GO:0007165	signal transduction	undefined	85	0.8
GO:0007165	signal transduction	undefined	85	0.8
GO:0023052	signaling	Biological Process	85	0.8
GO:0007165	signal transduction	undefined	85	0.8
GO:0046873	metal ion transmembrane transporter activity	undefined	84	0.8
GO:0022607	cellular component assembly	undefined	84	0.8
GO:0022607	cellular component assembly	undefined	84	0.8
GO:0022607	cellular component assembly	undefined	84	0.8
GO:0006351	transcription, DNA-templated	undefined	83	0.8
GO:0006351	transcription, DNA-templated	undefined	83	0.8
GO:0006351	transcription, DNA-templated	undefined	83	0.8
GO:0032774	RNA biosynthetic process	undefined	83	0.8
GO:0006351	transcription, DNA-templated	undefined	83	0.8
GO:0032774	RNA biosynthetic process	undefined	83	0.8
GO:0006351	transcription, DNA-templated	undefined	83	0.8
GO:0006351	transcription, DNA-templated	undefined	83	0.8
GO:0060089	molecular transducer activity	Molecular Function	82	0.8
GO:0038023	signaling receptor activity	undefined	82	0.8
GO:0016782	transferase activity, transferring sulfur-containing groups	undefined	81	0.7
GO:0016791	phosphatase activity	undefined	81	0.7
GO:0008289	lipid binding	undefined	80	0.7
GO:0016627	oxidoreductase activity, acting on the CH-CH group of donors	undefined	78	0.7
GO:0043933	protein-containing complex subunit organization	undefined	78	0.7
GO:0043933	protein-containing complex subunit organization	undefined	78	0.7
GO:0008146	sulfotransferase activity	undefined	77	0.7
GO:0019899	enzyme binding	undefined	77	0.7
GO:0008237	metallopeptidase activity	undefined	76	0.7
GO:0004888	transmembrane signaling receptor activity	undefined	75	0.7
GO:0065003	protein-containing complex assembly	undefined	75	0.7
GO:0065003	protein-containing complex assembly	undefined	75	0.7
GO:0065003	protein-containing complex assembly	undefined	75	0.7
GO:0065003	protein-containing complex assembly	undefined	75	0.7
GO:0005634	nucleus	undefined	73	0.7
GO:0005634	nucleus	undefined	73	0.7
GO:0019842	vitamin binding	undefined	73	0.7
GO:0005737	cytoplasm	undefined	71	0.7
GO:0005737	cytoplasm	undefined	71	0.7
GO:0042802	identical protein binding	undefined	71	0.7
GO:0030234	enzyme regulator activity	undefined	71	0.7
GO:0044444	cytoplasmic part	undefined	69	0.6
GO:0044444	cytoplasmic part	undefined	69	0.6
GO:0044444	cytoplasmic part	undefined	69	0.6
GO:0140101	catalytic activity, acting on a tRNA	undefined	69	0.6
GO:0044422	organelle part	undefined	67	0.6
GO:0044422	organelle part	Cellular Component	67	0.6
GO:0015631	tubulin binding	undefined	67	0.6
GO:0004930	G protein-coupled receptor activity	undefined	67	0.6
GO:0016192	vesicle-mediated transport	undefined	67	0.6
GO:0044446	intracellular organelle part	undefined	66	0.6
GO:0044446	intracellular organelle part	undefined	66	0.6
GO:0044446	intracellular organelle part	undefined	66	0.6
GO:0044446	intracellular organelle part	undefined	66	0.6
GO:0044446	intracellular organelle part	undefined	66	0.6
GO:0044446	intracellular organelle part	undefined	66	0.6
GO:0015077	monovalent inorganic cation transmembrane transporter activity	undefined	65	0.6
GO:0070279	vitamin B6 binding	undefined	64	0.6
GO:0030170	pyridoxal phosphate binding	undefined	64	0.6
GO:0070279	vitamin B6 binding	undefined	64	0.6
GO:0030170	pyridoxal phosphate binding	undefined	64	0.6
GO:0030170	pyridoxal phosphate binding	undefined	64	0.6
GO:0070279	vitamin B6 binding	undefined	64	0.6
GO:0070279	vitamin B6 binding	undefined	64	0.6
GO:0016758	transferase activity, transferring hexosyl groups	undefined	62	0.6
GO:0003678	DNA helicase activity	undefined	62	0.6
GO:0055114	oxidation-reduction process	undefined	62	0.6
GO:0050660	flavin adenine dinucleotide binding	undefined	61	0.6
GO:0050660	flavin adenine dinucleotide binding	undefined	61	0.6
GO:0050660	flavin adenine dinucleotide binding	undefined	61	0.6
GO:0050660	flavin adenine dinucleotide binding	undefined	61	0.6
GO:0071949	FAD binding	undefined	61	0.6
GO:0007049	cell cycle	undefined	61	0.6
GO:0101005	ubiquitinyl hydrolase activity	undefined	59	0.5
GO:0101005	ubiquitinyl hydrolase activity	undefined	59	0.5
GO:0036459	thiol-dependent ubiquitinyl hydrolase activity	undefined	59	0.5
GO:0065008	regulation of biological quality	undefined	59	0.5
GO:0006259	DNA metabolic process	undefined	58	0.5
GO:0006259	DNA metabolic process	undefined	58	0.5
GO:0006259	DNA metabolic process	undefined	58	0.5
GO:0051704	multi-organism process	Biological Process	57	0.5
GO:0044281	small molecule metabolic process	undefined	56	0.5
GO:0008017	microtubule binding	undefined	55	0.5
GO:0051020	GTPase binding	undefined	54	0.5
GO:0034622	cellular protein-containing complex assembly	undefined	54	0.5
GO:0034622	cellular protein-containing complex assembly	undefined	54	0.5
GO:0004497	monooxygenase activity	undefined	53	0.5
GO:0009055	electron transfer activity	undefined	52	0.5
GO:0016779	nucleotidyltransferase activity	undefined	52	0.5
GO:1901566	organonitrogen compound biosynthetic process	undefined	52	0.5
GO:1901566	organonitrogen compound biosynthetic process	undefined	52	0.5
GO:1901566	organonitrogen compound biosynthetic process	undefined	52	0.5
GO:1901566	organonitrogen compound biosynthetic process	undefined	52	0.5
GO:0000287	magnesium ion binding	undefined	50	0.5
GO:0022804	active transmembrane transporter activity	undefined	50	0.5
GO:0051276	chromosome organization	undefined	49	0.5
GO:0009378	four-way junction helicase activity	undefined	48	0.4
GO:0006811	ion transport	undefined	47	0.4
GO:0008757	S-adenosylmethionine-dependent methyltransferase activity	undefined	46	0.4
GO:0008484	sulfuric ester hydrolase activity	undefined	46	0.4
GO:0006950	response to stress	undefined	46	0.4
GO:0044419	interspecies interaction between organisms	undefined	46	0.4
GO:0022613	ribonucleoprotein complex biogenesis	undefined	45	0.4
GO:0045454	cell redox homeostasis	undefined	44	0.4
GO:0019725	cellular homeostasis	undefined	44	0.4
GO:0042592	homeostatic process	undefined	44	0.4
GO:0019725	cellular homeostasis	undefined	44	0.4
GO:0045454	cell redox homeostasis	undefined	44	0.4
GO:0045454	cell redox homeostasis	undefined	44	0.4
GO:0045454	cell redox homeostasis	undefined	44	0.4
GO:0016879	ligase activity, forming carbon-nitrogen bonds	undefined	43	0.4
GO:0031267	small GTPase binding	undefined	43	0.4
GO:0003712	transcription coregulator activity	undefined	43	0.4
GO:1901135	carbohydrate derivative metabolic process	undefined	43	0.4
GO:0006793	phosphorus metabolic process	undefined	42	0.4
GO:0006796	phosphate-containing compound metabolic process	undefined	42	0.4
GO:0006793	phosphorus metabolic process	undefined	42	0.4
GO:0006796	phosphate-containing compound metabolic process	undefined	42	0.4
GO:0008238	exopeptidase activity	undefined	41	0.4
GO:0016209	antioxidant activity	Molecular Function	41	0.4
GO:0019637	organophosphate metabolic process	undefined	41	0.4
GO:0019637	organophosphate metabolic process	undefined	41	0.4
GO:0019637	organophosphate metabolic process	undefined	41	0.4
GO:0022402	cell cycle process	undefined	41	0.4
GO:0022402	cell cycle process	undefined	41	0.4
GO:0016790	thiolester hydrolase activity	undefined	40	0.4
GO:0005085	guanyl-nucleotide exchange factor activity	undefined	40	0.4
GO:0005085	guanyl-nucleotide exchange factor activity	undefined	40	0.4
GO:0048519	negative regulation of biological process	undefined	40	0.4
GO:0048519	negative regulation of biological process	undefined	40	0.4
GO:0048519	negative regulation of biological process	Biological Process	40	0.4
GO:0033764	steroid dehydrogenase activity, acting on the CH-OH group of donors, NAD or NADP as acceptor	undefined	39	0.4
GO:0016229	steroid dehydrogenase activity	undefined	39	0.4
GO:0033764	steroid dehydrogenase activity, acting on the CH-OH group of donors, NAD or NADP as acceptor	undefined	39	0.4
GO:0003854	3-beta-hydroxy-delta5-steroid dehydrogenase activity	undefined	39	0.4
GO:0051287	NAD binding	undefined	39	0.4
GO:0051287	NAD binding	undefined	39	0.4
GO:0051287	NAD binding	undefined	39	0.4
GO:0019222	regulation of metabolic process	undefined	39	0.4
GO:0009056	catabolic process	undefined	39	0.4
GO:0019222	regulation of metabolic process	undefined	39	0.4
GO:0042254	ribosome biogenesis	undefined	39	0.4
GO:0008081	phosphoric diester hydrolase activity	undefined	38	0.4
GO:0044248	cellular catabolic process	undefined	38	0.4
GO:0044248	cellular catabolic process	undefined	38	0.4
GO:0044248	cellular catabolic process	undefined	38	0.4
GO:0003857	3-hydroxyacyl-CoA dehydrogenase activity	undefined	37	0.3
GO:0016701	oxidoreductase activity, acting on single donors with incorporation of molecular oxygen	undefined	37	0.3
GO:0004721	phosphoprotein phosphatase activity	undefined	37	0.3
GO:0005543	phospholipid binding	undefined	37	0.3
GO:0005543	phospholipid binding	undefined	37	0.3
GO:0033554	cellular response to stress	undefined	37	0.3
GO:0006974	cellular response to DNA damage stimulus	undefined	37	0.3
GO:0033554	cellular response to stress	undefined	37	0.3
GO:0060255	regulation of macromolecule metabolic process	undefined	37	0.3
GO:0060255	regulation of macromolecule metabolic process	undefined	37	0.3
GO:0060255	regulation of macromolecule metabolic process	undefined	37	0.3
GO:0016638	oxidoreductase activity, acting on the CH-NH2 group of donors	undefined	36	0.3
GO:0016835	carbon-oxygen lyase activity	undefined	36	0.3
GO:0016830	carbon-carbon lyase activity	undefined	36	0.3
GO:0003755	peptidyl-prolyl cis-trans isomerase activity	undefined	36	0.3
GO:0016859	cis-trans isomerase activity	undefined	36	0.3
GO:0003755	peptidyl-prolyl cis-trans isomerase activity	undefined	36	0.3
GO:0035091	phosphatidylinositol binding	undefined	36	0.3
GO:0060589	nucleoside-triphosphatase regulator activity	undefined	36	0.3
GO:0010468	regulation of gene expression	undefined	36	0.3
GO:0010468	regulation of gene expression	undefined	36	0.3
GO:0010468	regulation of gene expression	undefined	36	0.3
GO:0010468	regulation of gene expression	undefined	36	0.3
GO:0035556	intracellular signal transduction	undefined	36	0.3
GO:0016289	CoA hydrolase activity	undefined	35	0.3
GO:0043232	intracellular non-membrane-bounded organelle	undefined	34	0.3
GO:0043232	intracellular non-membrane-bounded organelle	undefined	34	0.3
GO:0043228	non-membrane-bounded organelle	undefined	34	0.3
GO:0043232	intracellular non-membrane-bounded organelle	undefined	34	0.3
GO:0016831	carboxy-lyase activity	undefined	33	0.3
GO:0008509	anion transmembrane transporter activity	undefined	33	0.3
GO:0007010	cytoskeleton organization	undefined	33	0.3
GO:0048523	negative regulation of cellular process	undefined	33	0.3
GO:0048523	negative regulation of cellular process	undefined	33	0.3
GO:0048523	negative regulation of cellular process	undefined	33	0.3
GO:0048523	negative regulation of cellular process	undefined	33	0.3
GO:0048523	negative regulation of cellular process	undefined	33	0.3
GO:0048523	negative regulation of cellular process	undefined	33	0.3
GO:0048523	negative regulation of cellular process	undefined	33	0.3
GO:0004674	protein serine/threonine kinase activity	undefined	32	0.3
GO:0008135	translation factor activity, RNA binding	undefined	32	0.3
GO:0008135	translation factor activity, RNA binding	undefined	32	0.3
GO:0003779	actin binding	undefined	32	0.3
GO:0015291	secondary active transmembrane transporter activity	undefined	32	0.3
GO:0031323	regulation of cellular metabolic process	undefined	32	0.3
GO:0031323	regulation of cellular metabolic process	undefined	32	0.3
GO:0031323	regulation of cellular metabolic process	undefined	32	0.3
GO:0031323	regulation of cellular metabolic process	undefined	32	0.3
GO:0007017	microtubule-based process	undefined	32	0.3
GO:0006928	movement of cell or subcellular component	undefined	32	0.3
GO:0031323	regulation of cellular metabolic process	undefined	32	0.3
GO:0031323	regulation of cellular metabolic process	undefined	32	0.3
GO:0031323	regulation of cellular metabolic process	undefined	32	0.3
GO:0004518	nuclease activity	undefined	31	0.3
GO:0016836	hydro-lyase activity	undefined	31	0.3
GO:0009451	RNA modification	undefined	31	0.3
GO:0040011	locomotion	Biological Process	31	0.3
GO:0052689	carboxylic ester hydrolase activity	undefined	30	0.3
GO:0016849	phosphorus-oxygen lyase activity	undefined	30	0.3
GO:0019219	regulation of nucleobase-containing compound metabolic process	undefined	30	0.3
GO:0019219	regulation of nucleobase-containing compound metabolic process	undefined	30	0.3
GO:0019219	regulation of nucleobase-containing compound metabolic process	undefined	30	0.3
GO:0019219	regulation of nucleobase-containing compound metabolic process	undefined	30	0.3
GO:0051171	regulation of nitrogen compound metabolic process	undefined	30	0.3
GO:0006508	proteolysis	undefined	30	0.3
GO:0006508	proteolysis	undefined	30	0.3
GO:0019219	regulation of nucleobase-containing compound metabolic process	undefined	30	0.3
GO:0019219	regulation of nucleobase-containing compound metabolic process	undefined	30	0.3
GO:0080090	regulation of primary metabolic process	undefined	30	0.3
GO:0019219	regulation of nucleobase-containing compound metabolic process	undefined	30	0.3
GO:0006508	proteolysis	undefined	30	0.3
GO:0051171	regulation of nitrogen compound metabolic process	undefined	30	0.3
GO:0019219	regulation of nucleobase-containing compound metabolic process	undefined	30	0.3
GO:0080090	regulation of primary metabolic process	undefined	30	0.3
GO:0019219	regulation of nucleobase-containing compound metabolic process	undefined	30	0.3
GO:0019219	regulation of nucleobase-containing compound metabolic process	undefined	30	0.3
GO:0080090	regulation of primary metabolic process	undefined	30	0.3
GO:0044403	symbiont process	undefined	30	0.3
GO:0016667	oxidoreductase activity, acting on a sulfur group of donors	undefined	29	0.3
GO:0004812	aminoacyl-tRNA ligase activity	undefined	29	0.3
GO:0016875	ligase activity, forming carbon-oxygen bonds	undefined	29	0.3
GO:0004812	aminoacyl-tRNA ligase activity	undefined	29	0.3
GO:0005088	Ras guanyl-nucleotide exchange factor activity	undefined	29	0.3
GO:0005089	Rho guanyl-nucleotide exchange factor activity	undefined	29	0.3
GO:0055086	nucleobase-containing small molecule metabolic process	undefined	29	0.3
GO:0055086	nucleobase-containing small molecule metabolic process	undefined	29	0.3
GO:0051252	regulation of RNA metabolic process	undefined	29	0.3
GO:0055086	nucleobase-containing small molecule metabolic process	undefined	29	0.3
GO:0051252	regulation of RNA metabolic process	undefined	29	0.3
GO:0055086	nucleobase-containing small molecule metabolic process	undefined	29	0.3
GO:0051252	regulation of RNA metabolic process	undefined	29	0.3
GO:0055086	nucleobase-containing small molecule metabolic process	undefined	29	0.3
GO:0051252	regulation of RNA metabolic process	undefined	29	0.3
GO:0051252	regulation of RNA metabolic process	undefined	29	0.3
GO:0051252	regulation of RNA metabolic process	undefined	29	0.3
GO:0055086	nucleobase-containing small molecule metabolic process	undefined	29	0.3
GO:0055086	nucleobase-containing small molecule metabolic process	undefined	29	0.3
GO:0051252	regulation of RNA metabolic process	undefined	29	0.3
GO:0048870	cell motility	undefined	29	0.3
GO:0051674	localization of cell	undefined	29	0.3
GO:0048870	cell motility	undefined	29	0.3
GO:0051252	regulation of RNA metabolic process	undefined	29	0.3
GO:0048870	cell motility	undefined	29	0.3
GO:0016032	viral process	undefined	29	0.3
GO:0016810	hydrolase activity, acting on carbon-nitrogen (but not peptide) bonds	undefined	28	0.3
GO:0008138	protein tyrosine/serine/threonine phosphatase activity	undefined	28	0.3
GO:0015297	antiporter activity	undefined	28	0.3
GO:0031326	regulation of cellular biosynthetic process	undefined	28	0.3
GO:2000112	regulation of cellular macromolecule biosynthetic process	undefined	28	0.3
GO:2001141	regulation of RNA biosynthetic process	undefined	28	0.3
GO:0090407	organophosphate biosynthetic process	undefined	28	0.3
GO:0044255	cellular lipid metabolic process	undefined	28	0.3
GO:2000112	regulation of cellular macromolecule biosynthetic process	undefined	28	0.3
GO:0031326	regulation of cellular biosynthetic process	undefined	28	0.3
GO:0010556	regulation of macromolecule biosynthetic process	undefined	28	0.3
GO:0090407	organophosphate biosynthetic process	undefined	28	0.3
GO:0090407	organophosphate biosynthetic process	undefined	28	0.3
GO:0044255	cellular lipid metabolic process	undefined	28	0.3
GO:0006355	regulation of transcription, DNA-templated	undefined	28	0.3
GO:0010556	regulation of macromolecule biosynthetic process	undefined	28	0.3
GO:2000112	regulation of cellular macromolecule biosynthetic process	undefined	28	0.3
GO:2001141	regulation of RNA biosynthetic process	undefined	28	0.3
GO:2001141	regulation of RNA biosynthetic process	undefined	28	0.3
GO:0031326	regulation of cellular biosynthetic process	undefined	28	0.3
GO:2000112	regulation of cellular macromolecule biosynthetic process	undefined	28	0.3
GO:2001141	regulation of RNA biosynthetic process	undefined	28	0.3
GO:0009889	regulation of biosynthetic process	undefined	28	0.3
GO:0010556	regulation of macromolecule biosynthetic process	undefined	28	0.3
GO:2000112	regulation of cellular macromolecule biosynthetic process	undefined	28	0.3
GO:2001141	regulation of RNA biosynthetic process	undefined	28	0.3
GO:0031326	regulation of cellular biosynthetic process	undefined	28	0.3
GO:2000112	regulation of cellular macromolecule biosynthetic process	undefined	28	0.3
GO:0031326	regulation of cellular biosynthetic process	undefined	28	0.3
GO:0010556	regulation of macromolecule biosynthetic process	undefined	28	0.3
GO:0090407	organophosphate biosynthetic process	undefined	28	0.3
GO:0009889	regulation of biosynthetic process	undefined	28	0.3
GO:0031326	regulation of cellular biosynthetic process	undefined	28	0.3
GO:2000112	regulation of cellular macromolecule biosynthetic process	undefined	28	0.3
GO:2001141	regulation of RNA biosynthetic process	undefined	28	0.3
GO:0090407	organophosphate biosynthetic process	undefined	28	0.3
GO:0044255	cellular lipid metabolic process	undefined	28	0.3
GO:2000112	regulation of cellular macromolecule biosynthetic process	undefined	28	0.3
GO:0031326	regulation of cellular biosynthetic process	undefined	28	0.3
GO:0031326	regulation of cellular biosynthetic process	undefined	28	0.3
GO:2000112	regulation of cellular macromolecule biosynthetic process	undefined	28	0.3
GO:2001141	regulation of RNA biosynthetic process	undefined	28	0.3
GO:0010556	regulation of macromolecule biosynthetic process	undefined	28	0.3
GO:0031326	regulation of cellular biosynthetic process	undefined	28	0.3
GO:0009889	regulation of biosynthetic process	undefined	28	0.3
GO:0010556	regulation of macromolecule biosynthetic process	undefined	28	0.3
GO:0031326	regulation of cellular biosynthetic process	undefined	28	0.3
GO:0031326	regulation of cellular biosynthetic process	undefined	28	0.3
GO:0031326	regulation of cellular biosynthetic process	undefined	28	0.3
GO:2000112	regulation of cellular macromolecule biosynthetic process	undefined	28	0.3
GO:2001141	regulation of RNA biosynthetic process	undefined	28	0.3
GO:0005856	cytoskeleton	undefined	27	0.2
GO:0071944	cell periphery	undefined	27	0.2
GO:0071944	cell periphery	undefined	27	0.2
GO:0005856	cytoskeleton	undefined	27	0.2
GO:1901505	carbohydrate derivative transmembrane transporter activity	undefined	27	0.2
GO:0015932	nucleobase-containing compound transmembrane transporter activity	undefined	27	0.2
GO:0008047	enzyme activator activity	undefined	27	0.2
GO:0006281	DNA repair	undefined	27	0.2
GO:0006281	DNA repair	undefined	27	0.2
GO:0006281	DNA repair	undefined	27	0.2
GO:0032940	secretion by cell	undefined	27	0.2
GO:0046903	secretion	undefined	27	0.2
GO:0032940	secretion by cell	undefined	27	0.2
GO:0005886	plasma membrane	undefined	26	0.2
GO:0005886	plasma membrane	undefined	26	0.2
GO:0005886	plasma membrane	undefined	26	0.2
GO:0005886	plasma membrane	undefined	26	0.2
GO:0005886	plasma membrane	undefined	26	0.2
GO:0016903	oxidoreductase activity, acting on the aldehyde or oxo group of donors	undefined	25	0.2
GO:0016703	oxidoreductase activity, acting on single donors with incorporation of molecular oxygen, incorporation of one atom of oxygen (internal monooxygenases or internal mixed function oxidases)	undefined	25	0.2
GO:0016703	oxidoreductase activity, acting on single donors with incorporation of molecular oxygen, incorporation of one atom of oxygen (internal monooxygenases or internal mixed function oxidases)	undefined	25	0.2
GO:0018580	nitronate monooxygenase activity	undefined	25	0.2
GO:0010181	FMN binding	undefined	25	0.2
GO:0010181	FMN binding	undefined	25	0.2
GO:0010181	FMN binding	undefined	25	0.2
GO:0010181	FMN binding	undefined	25	0.2
GO:0015103	inorganic anion transmembrane transporter activity	undefined	25	0.2
GO:0015103	inorganic anion transmembrane transporter activity	undefined	25	0.2
GO:0030695	GTPase regulator activity	undefined	25	0.2
GO:0016705	oxidoreductase activity, acting on paired donors, with incorporation or reduction of molecular oxygen	undefined	24	0.2
GO:0016684	oxidoreductase activity, acting on peroxide as acceptor	undefined	24	0.2
GO:0050661	NADP binding	undefined	24	0.2
GO:0043531	ADP binding	undefined	24	0.2
GO:0050661	NADP binding	undefined	24	0.2
GO:0050661	NADP binding	undefined	24	0.2
GO:0008134	transcription factor binding	undefined	24	0.2
GO:0030246	carbohydrate binding	undefined	24	0.2
GO:0006325	chromatin organization	undefined	24	0.2
GO:0048285	organelle fission	undefined	24	0.2
GO:0010256	endomembrane system organization	undefined	24	0.2
GO:0006325	chromatin organization	undefined	24	0.2
GO:0000278	mitotic cell cycle	undefined	24	0.2
GO:0033365	protein localization to organelle	undefined	24	0.2
GO:0048193	Golgi vesicle transport	undefined	24	0.2
GO:0010256	endomembrane system organization	undefined	24	0.2
GO:0006325	chromatin organization	undefined	24	0.2
GO:0000003	reproduction	Biological Process	24	0.2
GO:0022414	reproductive process	undefined	24	0.2
GO:0022414	reproductive process	Biological Process	24	0.2
GO:0044428	nuclear part	undefined	23	0.2
GO:0044428	nuclear part	undefined	23	0.2
GO:0012505	endomembrane system	undefined	23	0.2
GO:0012505	endomembrane system	undefined	23	0.2
GO:0044428	nuclear part	undefined	23	0.2
GO:0044428	nuclear part	undefined	23	0.2
GO:0016645	oxidoreductase activity, acting on the CH-NH group of donors	undefined	23	0.2
GO:0016763	transferase activity, transferring pentosyl groups	undefined	23	0.2
GO:0004725	protein tyrosine phosphatase activity	undefined	23	0.2
GO:0046983	protein dimerization activity	undefined	23	0.2
GO:0044877	protein-containing complex binding	undefined	23	0.2
GO:0006887	exocytosis	undefined	23	0.2
GO:0006887	exocytosis	undefined	23	0.2
GO:0006260	DNA replication	undefined	22	0.2
GO:0006260	DNA replication	undefined	22	0.2
GO:0006260	DNA replication	undefined	22	0.2
GO:0009057	macromolecule catabolic process	undefined	22	0.2
GO:1901575	organic substance catabolic process	undefined	22	0.2
GO:0009057	macromolecule catabolic process	undefined	22	0.2
GO:1901575	organic substance catabolic process	undefined	22	0.2
GO:0009057	macromolecule catabolic process	undefined	22	0.2
GO:0006260	DNA replication	undefined	22	0.2
GO:0006260	DNA replication	undefined	22	0.2
GO:0006260	DNA replication	undefined	22	0.2
GO:0006260	DNA replication	undefined	22	0.2
GO:0051128	regulation of cellular component organization	undefined	22	0.2
GO:0051128	regulation of cellular component organization	undefined	22	0.2
GO:0051726	regulation of cell cycle	undefined	22	0.2
GO:0051726	regulation of cell cycle	undefined	22	0.2
GO:0072594	establishment of protein localization to organelle	undefined	22	0.2
GO:0072594	establishment of protein localization to organelle	undefined	22	0.2
GO:0051128	regulation of cellular component organization	undefined	22	0.2
GO:0051726	regulation of cell cycle	undefined	22	0.2
GO:0051128	regulation of cellular component organization	undefined	22	0.2
GO:0006364	rRNA processing	undefined	22	0.2
GO:0051128	regulation of cellular component organization	undefined	22	0.2
GO:0051726	regulation of cell cycle	undefined	22	0.2
GO:0016646	oxidoreductase activity, acting on the CH-NH group of donors, NAD or NADP as acceptor	undefined	21	0.2
GO:0030058	amine dehydrogenase activity	undefined	21	0.2
GO:0070003	threonine-type peptidase activity	undefined	21	0.2
GO:0016877	ligase activity, forming carbon-sulfur bonds	undefined	21	0.2
GO:0008641	ubiquitin-like modifier activating enzyme activity	undefined	21	0.2
GO:0051082	unfolded protein binding	undefined	21	0.2
GO:0044265	cellular macromolecule catabolic process	undefined	21	0.2
GO:0044265	cellular macromolecule catabolic process	undefined	21	0.2
GO:0006082	organic acid metabolic process	undefined	21	0.2
GO:0043436	oxoacid metabolic process	undefined	21	0.2
GO:0044265	cellular macromolecule catabolic process	undefined	21	0.2
GO:0044265	cellular macromolecule catabolic process	undefined	21	0.2
GO:0006082	organic acid metabolic process	undefined	21	0.2
GO:0044265	cellular macromolecule catabolic process	undefined	21	0.2
GO:0006082	organic acid metabolic process	undefined	21	0.2
GO:0044265	cellular macromolecule catabolic process	undefined	21	0.2
GO:0044265	cellular macromolecule catabolic process	undefined	21	0.2
GO:0006082	organic acid metabolic process	undefined	21	0.2
GO:0043436	oxoacid metabolic process	undefined	21	0.2
GO:0033043	regulation of organelle organization	undefined	21	0.2
GO:0033043	regulation of organelle organization	undefined	21	0.2
GO:0006812	cation transport	undefined	21	0.2
GO:0033043	regulation of organelle organization	undefined	21	0.2
GO:0032501	multicellular organismal process	Biological Process	21	0.2
GO:0031090	organelle membrane	undefined	20	0.2
GO:0031090	organelle membrane	undefined	20	0.2
GO:0031090	organelle membrane	undefined	20	0.2
GO:0031090	organelle membrane	undefined	20	0.2
GO:0016709	oxidoreductase activity, acting on paired donors, with incorporation or reduction of molecular oxygen, NAD(P)H as one donor, and incorporation of one atom of oxygen	undefined	20	0.2
GO:0016709	oxidoreductase activity, acting on paired donors, with incorporation or reduction of molecular oxygen, NAD(P)H as one donor, and incorporation of one atom of oxygen	undefined	20	0.2
GO:0097747	RNA polymerase activity	undefined	20	0.2
GO:0016769	transferase activity, transferring nitrogenous groups	undefined	20	0.2
GO:0008483	transaminase activity	undefined	20	0.2
GO:0097747	RNA polymerase activity	undefined	20	0.2
GO:0034062	5'-3' RNA polymerase activity	undefined	20	0.2
GO:0022839	ion gated channel activity	undefined	20	0.2
GO:0022836	gated channel activity	undefined	20	0.2
GO:1901137	carbohydrate derivative biosynthetic process	undefined	20	0.2
GO:1901137	carbohydrate derivative biosynthetic process	undefined	20	0.2
GO:1901137	carbohydrate derivative biosynthetic process	undefined	20	0.2
GO:0051259	protein complex oligomerization	undefined	20	0.2
GO:0051259	protein complex oligomerization	undefined	20	0.2
GO:0051259	protein complex oligomerization	undefined	20	0.2
GO:0051259	protein complex oligomerization	undefined	20	0.2
GO:0032502	developmental process	Biological Process	20	0.2
GO:0000160	phosphorelay signal transduction system	undefined	20	0.2
GO:0071203	WASH complex	undefined	19	0.2
GO:0071203	WASH complex	undefined	19	0.2
GO:0071203	WASH complex	undefined	19	0.2
GO:0006644	phospholipid metabolic process	undefined	19	0.2
GO:0006644	phospholipid metabolic process	undefined	19	0.2
GO:0046486	glycerolipid metabolic process	undefined	19	0.2
GO:0006650	glycerophospholipid metabolic process	undefined	19	0.2
GO:0006644	phospholipid metabolic process	undefined	19	0.2
GO:0006650	glycerophospholipid metabolic process	undefined	19	0.2
GO:0008610	lipid biosynthetic process	undefined	19	0.2
GO:0008610	lipid biosynthetic process	undefined	19	0.2
GO:0008610	lipid biosynthetic process	undefined	19	0.2
GO:0008610	lipid biosynthetic process	undefined	19	0.2
GO:0044283	small molecule biosynthetic process	undefined	19	0.2
GO:0044283	small molecule biosynthetic process	undefined	19	0.2
GO:0006644	phospholipid metabolic process	undefined	19	0.2
GO:0006644	phospholipid metabolic process	undefined	19	0.2
GO:0046486	glycerolipid metabolic process	undefined	19	0.2
GO:0006650	glycerophospholipid metabolic process	undefined	19	0.2
GO:0006644	phospholipid metabolic process	undefined	19	0.2
GO:0006650	glycerophospholipid metabolic process	undefined	19	0.2
GO:0045786	negative regulation of cell cycle	undefined	19	0.2
GO:0045786	negative regulation of cell cycle	undefined	19	0.2
GO:0045786	negative regulation of cell cycle	undefined	19	0.2
GO:0045786	negative regulation of cell cycle	undefined	19	0.2
GO:0051169	nuclear transport	undefined	19	0.2
GO:0006913	nucleocytoplasmic transport	undefined	19	0.2
GO:0051169	nuclear transport	undefined	19	0.2
GO:0051169	nuclear transport	undefined	19	0.2
GO:0045786	negative regulation of cell cycle	undefined	19	0.2
GO:0045786	negative regulation of cell cycle	undefined	19	0.2
GO:0045786	negative regulation of cell cycle	undefined	19	0.2
GO:0045786	negative regulation of cell cycle	undefined	19	0.2
GO:0045786	negative regulation of cell cycle	undefined	19	0.2
GO:0070013	intracellular organelle lumen	undefined	18	0.2
GO:0070013	intracellular organelle lumen	undefined	18	0.2
GO:0070013	intracellular organelle lumen	undefined	18	0.2
GO:0070013	intracellular organelle lumen	undefined	18	0.2
GO:0070013	intracellular organelle lumen	undefined	18	0.2
GO:0043233	organelle lumen	undefined	18	0.2
GO:0043233	organelle lumen	undefined	18	0.2
GO:0031974	membrane-enclosed lumen	Cellular Component	18	0.2
GO:0043233	organelle lumen	undefined	18	0.2
GO:0070013	intracellular organelle lumen	undefined	18	0.2
GO:0016776	phosphotransferase activity, phosphate group as acceptor	undefined	18	0.2
GO:0008173	RNA methyltransferase activity	undefined	18	0.2
GO:0008173	RNA methyltransferase activity	undefined	18	0.2
GO:0003899	DNA-directed 5'-3' RNA polymerase activity	undefined	18	0.2
GO:0016881	acid-amino acid ligase activity	undefined	18	0.2
GO:0005102	signaling receptor binding	undefined	18	0.2
GO:0015399	primary active transmembrane transporter activity	undefined	18	0.2
GO:0015405	P-P-bond-hydrolysis-driven transmembrane transporter activity	undefined	18	0.2
GO:0007186	G protein-coupled receptor signaling pathway	undefined	18	0.2
GO:0030163	protein catabolic process	undefined	18	0.2
GO:1901565	organonitrogen compound catabolic process	undefined	18	0.2
GO:0030163	protein catabolic process	undefined	18	0.2
GO:0030163	protein catabolic process	undefined	18	0.2
GO:0030163	protein catabolic process	undefined	18	0.2
GO:1901565	organonitrogen compound catabolic process	undefined	18	0.2
GO:0030163	protein catabolic process	undefined	18	0.2
GO:1901565	organonitrogen compound catabolic process	undefined	18	0.2
GO:0005975	carbohydrate metabolic process	undefined	18	0.2
GO:0030163	protein catabolic process	undefined	18	0.2
GO:0005975	carbohydrate metabolic process	undefined	18	0.2
GO:0030163	protein catabolic process	undefined	18	0.2
GO:1901565	organonitrogen compound catabolic process	undefined	18	0.2
GO:0030163	protein catabolic process	undefined	18	0.2
GO:0007186	G protein-coupled receptor signaling pathway	undefined	18	0.2
GO:0070925	organelle assembly	undefined	18	0.2
GO:0070925	organelle assembly	undefined	18	0.2
GO:0007186	G protein-coupled receptor signaling pathway	undefined	18	0.2
GO:1903047	mitotic cell cycle process	undefined	18	0.2
GO:1903047	mitotic cell cycle process	undefined	18	0.2
GO:1903047	mitotic cell cycle process	undefined	18	0.2
GO:0007186	G protein-coupled receptor signaling pathway	undefined	18	0.2
GO:0007186	G protein-coupled receptor signaling pathway	undefined	18	0.2
GO:0007059	chromosome segregation	undefined	18	0.2
GO:0007186	G protein-coupled receptor signaling pathway	undefined	18	0.2
GO:0070925	organelle assembly	undefined	18	0.2
GO:0070925	organelle assembly	undefined	18	0.2
GO:0007186	G protein-coupled receptor signaling pathway	undefined	18	0.2
GO:0048856	anatomical structure development	undefined	18	0.2
GO:0019058	viral life cycle	undefined	18	0.2
GO:0007186	G protein-coupled receptor signaling pathway	undefined	18	0.2
GO:0005739	mitochondrion	undefined	17	0.2
GO:0005739	mitochondrion	undefined	17	0.2
GO:0005739	mitochondrion	undefined	17	0.2
GO:0031975	envelope	undefined	17	0.2
GO:0031975	envelope	undefined	17	0.2
GO:0098796	membrane protein complex	undefined	17	0.2
GO:0005739	mitochondrion	undefined	17	0.2
GO:0005739	mitochondrion	undefined	17	0.2
GO:0098796	membrane protein complex	undefined	17	0.2
GO:0019012	virion	Cellular Component	17	0.2
GO:0044423	virion part	undefined	17	0.2
GO:0044423	virion part	Cellular Component	17	0.2
GO:0004601	peroxidase activity	undefined	17	0.2
GO:0019205	nucleobase-containing compound kinase activity	undefined	17	0.2
GO:0008194	UDP-glycosyltransferase activity	undefined	17	0.2
GO:0016811	hydrolase activity, acting on carbon-nitrogen (but not peptide) bonds, in linear amides	undefined	17	0.2
GO:1901681	sulfur compound binding	undefined	17	0.2
GO:0004601	peroxidase activity	undefined	17	0.2
GO:0000981	DNA-binding transcription factor activity, RNA polymerase II-specific	undefined	17	0.2
GO:0043632	modification-dependent macromolecule catabolic process	undefined	17	0.2
GO:0044257	cellular protein catabolic process	undefined	17	0.2
GO:0044257	cellular protein catabolic process	undefined	17	0.2
GO:0043632	modification-dependent macromolecule catabolic process	undefined	17	0.2
GO:0044257	cellular protein catabolic process	undefined	17	0.2
GO:0006914	autophagy	undefined	17	0.2
GO:0019752	carboxylic acid metabolic process	undefined	17	0.2
GO:0009116	nucleoside metabolic process	undefined	17	0.2
GO:1901657	glycosyl compound metabolic process	undefined	17	0.2
GO:0009116	nucleoside metabolic process	undefined	17	0.2
GO:0009116	nucleoside metabolic process	undefined	17	0.2
GO:0009116	nucleoside metabolic process	undefined	17	0.2
GO:0044257	cellular protein catabolic process	undefined	17	0.2
GO:0051603	proteolysis involved in cellular protein catabolic process	undefined	17	0.2
GO:0043632	modification-dependent macromolecule catabolic process	undefined	17	0.2
GO:0044257	cellular protein catabolic process	undefined	17	0.2
GO:0006914	autophagy	undefined	17	0.2
GO:0009116	nucleoside metabolic process	undefined	17	0.2
GO:0043632	modification-dependent macromolecule catabolic process	undefined	17	0.2
GO:0044257	cellular protein catabolic process	undefined	17	0.2
GO:0044257	cellular protein catabolic process	undefined	17	0.2
GO:0043632	modification-dependent macromolecule catabolic process	undefined	17	0.2
GO:0044257	cellular protein catabolic process	undefined	17	0.2
GO:0006914	autophagy	undefined	17	0.2
GO:0019752	carboxylic acid metabolic process	undefined	17	0.2
GO:0000280	nuclear division	undefined	17	0.2
GO:0000075	cell cycle checkpoint	undefined	17	0.2
GO:0140014	mitotic nuclear division	undefined	17	0.2
GO:0140014	mitotic nuclear division	undefined	17	0.2
GO:0140014	mitotic nuclear division	undefined	17	0.2
GO:0000075	cell cycle checkpoint	undefined	17	0.2
GO:0000075	cell cycle checkpoint	undefined	17	0.2
GO:0061919	process utilizing autophagic mechanism	undefined	17	0.2
GO:0006914	autophagy	undefined	17	0.2
GO:0017038	protein import	undefined	17	0.2
GO:0000075	cell cycle checkpoint	undefined	17	0.2
GO:0000075	cell cycle checkpoint	undefined	17	0.2
GO:0000075	cell cycle checkpoint	undefined	17	0.2
GO:0031967	organelle envelope	undefined	16	0.1
GO:0031981	nuclear lumen	undefined	16	0.1
GO:0031981	nuclear lumen	undefined	16	0.1
GO:0031967	organelle envelope	undefined	16	0.1
GO:0031981	nuclear lumen	undefined	16	0.1
GO:0031967	organelle envelope	undefined	16	0.1
GO:0031967	organelle envelope	undefined	16	0.1
GO:0031967	organelle envelope	undefined	16	0.1
GO:0031967	organelle envelope	undefined	16	0.1
GO:0031981	nuclear lumen	undefined	16	0.1
GO:0031967	organelle envelope	undefined	16	0.1
GO:0031967	organelle envelope	undefined	16	0.1
GO:0016620	oxidoreductase activity, acting on the aldehyde or oxo group of donors, NAD or NADP as acceptor	undefined	16	0.1
GO:0016775	phosphotransferase activity, nitrogenous group as acceptor	undefined	16	0.1
GO:0004673	protein histidine kinase activity	undefined	16	0.1
GO:0050145	nucleoside monophosphate kinase activity	undefined	16	0.1
GO:0004673	protein histidine kinase activity	undefined	16	0.1
GO:0019900	kinase binding	undefined	16	0.1
GO:0019901	protein kinase binding	undefined	16	0.1
GO:0016407	acetyltransferase activity	undefined	15	0.1
GO:0008374	O-acyltransferase activity	undefined	15	0.1
GO:0008276	protein methyltransferase activity	undefined	15	0.1
GO:0015923	mannosidase activity	undefined	15	0.1
GO:0000155	phosphorelay sensor kinase activity	undefined	15	0.1
GO:0008276	protein methyltransferase activity	undefined	15	0.1
GO:0016854	racemase and epimerase activity	undefined	15	0.1
GO:0000049	tRNA binding	undefined	15	0.1
GO:0000049	tRNA binding	undefined	15	0.1
GO:0051536	iron-sulfur cluster binding	undefined	15	0.1
GO:0033218	amide binding	undefined	15	0.1
GO:0051540	metal cluster binding	undefined	15	0.1
GO:0051536	iron-sulfur cluster binding	undefined	15	0.1
GO:0019829	cation-transporting ATPase activity	undefined	15	0.1
GO:0015298	solute:cation antiporter activity	undefined	15	0.1
GO:0022853	active ion transmembrane transporter activity	undefined	15	0.1
GO:0022853	active ion transmembrane transporter activity	undefined	15	0.1
GO:0042625	ATPase coupled ion transmembrane transporter activity	undefined	15	0.1
GO:0005096	GTPase activator activity	undefined	15	0.1
GO:0005096	GTPase activator activity	undefined	15	0.1
GO:0051186	cofactor metabolic process	undefined	15	0.1
GO:0006520	cellular amino acid metabolic process	undefined	15	0.1
GO:0006520	cellular amino acid metabolic process	undefined	15	0.1
GO:0006520	cellular amino acid metabolic process	undefined	15	0.1
GO:0051186	cofactor metabolic process	undefined	15	0.1
GO:0000819	sister chromatid segregation	undefined	15	0.1
GO:0000226	microtubule cytoskeleton organization	undefined	15	0.1
GO:0010639	negative regulation of organelle organization	undefined	15	0.1
GO:0010639	negative regulation of organelle organization	undefined	15	0.1
GO:0010639	negative regulation of organelle organization	undefined	15	0.1
GO:0051129	negative regulation of cellular component organization	undefined	15	0.1
GO:0051129	negative regulation of cellular component organization	undefined	15	0.1
GO:0010639	negative regulation of organelle organization	undefined	15	0.1
GO:0051129	negative regulation of cellular component organization	undefined	15	0.1
GO:0051129	negative regulation of cellular component organization	undefined	15	0.1
GO:0098813	nuclear chromosome segregation	undefined	15	0.1
GO:0000819	sister chromatid segregation	undefined	15	0.1
GO:0000070	mitotic sister chromatid segregation	undefined	15	0.1
GO:0000070	mitotic sister chromatid segregation	undefined	15	0.1
GO:0098813	nuclear chromosome segregation	undefined	15	0.1
GO:0000819	sister chromatid segregation	undefined	15	0.1
GO:0000070	mitotic sister chromatid segregation	undefined	15	0.1
GO:0000070	mitotic sister chromatid segregation	undefined	15	0.1
GO:0000070	mitotic sister chromatid segregation	undefined	15	0.1
GO:0000226	microtubule cytoskeleton organization	undefined	15	0.1
GO:0051129	negative regulation of cellular component organization	undefined	15	0.1
GO:0051301	cell division	undefined	15	0.1
GO:0098813	nuclear chromosome segregation	undefined	15	0.1
GO:0006606	protein import into nucleus	undefined	15	0.1
GO:0006606	protein import into nucleus	undefined	15	0.1
GO:0051129	negative regulation of cellular component organization	undefined	15	0.1
GO:0051129	negative regulation of cellular component organization	undefined	15	0.1
GO:0051129	negative regulation of cellular component organization	undefined	15	0.1
GO:0010639	negative regulation of organelle organization	undefined	15	0.1
GO:0051129	negative regulation of cellular component organization	undefined	15	0.1
GO:0051129	negative regulation of cellular component organization	undefined	15	0.1
GO:0010639	negative regulation of organelle organization	undefined	15	0.1
GO:0051129	negative regulation of cellular component organization	undefined	15	0.1
GO:0051129	negative regulation of cellular component organization	undefined	15	0.1
GO:0051129	negative regulation of cellular component organization	undefined	15	0.1
GO:0051129	negative regulation of cellular component organization	undefined	15	0.1
GO:0009405	pathogenesis	undefined	15	0.1
GO:0044430	cytoskeletal part	undefined	14	0.1
GO:0044430	cytoskeletal part	undefined	14	0.1
GO:0044430	cytoskeletal part	undefined	14	0.1
GO:0044459	plasma membrane part	undefined	14	0.1
GO:0044459	plasma membrane part	undefined	14	0.1
GO:1990904	ribonucleoprotein complex	undefined	14	0.1
GO:0044430	cytoskeletal part	undefined	14	0.1
GO:0044430	cytoskeletal part	undefined	14	0.1
GO:0044430	cytoskeletal part	undefined	14	0.1
GO:0044459	plasma membrane part	undefined	14	0.1
GO:0044459	plasma membrane part	undefined	14	0.1
GO:0044459	plasma membrane part	undefined	14	0.1
GO:0016410	N-acyltransferase activity	undefined	14	0.1
GO:0016765	transferase activity, transferring alkyl or aryl (other than methyl) groups	undefined	14	0.1
GO:0008375	acetylglucosaminyltransferase activity	undefined	14	0.1
GO:0008375	acetylglucosaminyltransferase activity	undefined	14	0.1
GO:0016866	intramolecular transferase activity	undefined	14	0.1
GO:0019208	phosphatase regulator activity	undefined	14	0.1
GO:0004857	enzyme inhibitor activity	undefined	14	0.1
GO:0000105	histidine biosynthetic process	undefined	14	0.1
GO:0052803	imidazole-containing compound metabolic process	undefined	14	0.1
GO:0052803	imidazole-containing compound metabolic process	undefined	14	0.1
GO:0006547	histidine metabolic process	undefined	14	0.1
GO:0009073	aromatic amino acid family biosynthetic process	undefined	14	0.1
GO:0009072	aromatic amino acid family metabolic process	undefined	14	0.1
GO:0006547	histidine metabolic process	undefined	14	0.1
GO:0009073	aromatic amino acid family biosynthetic process	undefined	14	0.1
GO:0052803	imidazole-containing compound metabolic process	undefined	14	0.1
GO:0000105	histidine biosynthetic process	undefined	14	0.1
GO:0009073	aromatic amino acid family biosynthetic process	undefined	14	0.1
GO:0051188	cofactor biosynthetic process	undefined	14	0.1
GO:0016053	organic acid biosynthetic process	undefined	14	0.1
GO:0051188	cofactor biosynthetic process	undefined	14	0.1
GO:0006732	coenzyme metabolic process	undefined	14	0.1
GO:0016053	organic acid biosynthetic process	undefined	14	0.1
GO:0046394	carboxylic acid biosynthetic process	undefined	14	0.1
GO:0052803	imidazole-containing compound metabolic process	undefined	14	0.1
GO:0006547	histidine metabolic process	undefined	14	0.1
GO:0008652	cellular amino acid biosynthetic process	undefined	14	0.1
GO:0008652	cellular amino acid biosynthetic process	undefined	14	0.1
GO:0009072	aromatic amino acid family metabolic process	undefined	14	0.1
GO:1901605	alpha-amino acid metabolic process	undefined	14	0.1
GO:0052803	imidazole-containing compound metabolic process	undefined	14	0.1
GO:0009073	aromatic amino acid family biosynthetic process	undefined	14	0.1
GO:0009072	aromatic amino acid family metabolic process	undefined	14	0.1
GO:0009073	aromatic amino acid family biosynthetic process	undefined	14	0.1
GO:0052803	imidazole-containing compound metabolic process	undefined	14	0.1
GO:0008652	cellular amino acid biosynthetic process	undefined	14	0.1
GO:0016053	organic acid biosynthetic process	undefined	14	0.1
GO:0008652	cellular amino acid biosynthetic process	undefined	14	0.1
GO:0008652	cellular amino acid biosynthetic process	undefined	14	0.1
GO:0009072	aromatic amino acid family metabolic process	undefined	14	0.1
GO:1901605	alpha-amino acid metabolic process	undefined	14	0.1
GO:0052803	imidazole-containing compound metabolic process	undefined	14	0.1
GO:0016053	organic acid biosynthetic process	undefined	14	0.1
GO:0046394	carboxylic acid biosynthetic process	undefined	14	0.1
GO:0008652	cellular amino acid biosynthetic process	undefined	14	0.1
GO:1901607	alpha-amino acid biosynthetic process	undefined	14	0.1
GO:0009073	aromatic amino acid family biosynthetic process	undefined	14	0.1
GO:0009072	aromatic amino acid family metabolic process	undefined	14	0.1
GO:1901605	alpha-amino acid metabolic process	undefined	14	0.1
GO:0006547	histidine metabolic process	undefined	14	0.1
GO:1901607	alpha-amino acid biosynthetic process	undefined	14	0.1
GO:0000105	histidine biosynthetic process	undefined	14	0.1
GO:0009073	aromatic amino acid family biosynthetic process	undefined	14	0.1
GO:0051188	cofactor biosynthetic process	undefined	14	0.1
GO:0016053	organic acid biosynthetic process	undefined	14	0.1
GO:0009073	aromatic amino acid family biosynthetic process	undefined	14	0.1
GO:0008652	cellular amino acid biosynthetic process	undefined	14	0.1
GO:0016053	organic acid biosynthetic process	undefined	14	0.1
GO:0016053	organic acid biosynthetic process	undefined	14	0.1
GO:0016053	organic acid biosynthetic process	undefined	14	0.1
GO:0016053	organic acid biosynthetic process	undefined	14	0.1
GO:0046394	carboxylic acid biosynthetic process	undefined	14	0.1
GO:0009073	aromatic amino acid family biosynthetic process	undefined	14	0.1
GO:0009072	aromatic amino acid family metabolic process	undefined	14	0.1
GO:0006547	histidine metabolic process	undefined	14	0.1
GO:0009073	aromatic amino acid family biosynthetic process	undefined	14	0.1
GO:0052803	imidazole-containing compound metabolic process	undefined	14	0.1
GO:0000105	histidine biosynthetic process	undefined	14	0.1
GO:0009073	aromatic amino acid family biosynthetic process	undefined	14	0.1
GO:0051188	cofactor biosynthetic process	undefined	14	0.1
GO:0016053	organic acid biosynthetic process	undefined	14	0.1
GO:0051188	cofactor biosynthetic process	undefined	14	0.1
GO:0006732	coenzyme metabolic process	undefined	14	0.1
GO:0016053	organic acid biosynthetic process	undefined	14	0.1
GO:0046394	carboxylic acid biosynthetic process	undefined	14	0.1
GO:0000910	cytokinesis	undefined	14	0.1
GO:0043093	FtsZ-dependent cytokinesis	undefined	14	0.1
GO:0000910	cytokinesis	undefined	14	0.1
GO:0043093	FtsZ-dependent cytokinesis	undefined	14	0.1
GO:0000910	cytokinesis	undefined	14	0.1
GO:0007034	vacuolar transport	undefined	14	0.1
GO:0043093	FtsZ-dependent cytokinesis	undefined	14	0.1
GO:0019954	asexual reproduction	undefined	14	0.1
GO:0043093	FtsZ-dependent cytokinesis	undefined	14	0.1
GO:0032505	reproduction of a single-celled organism	undefined	14	0.1
GO:0043093	FtsZ-dependent cytokinesis	undefined	14	0.1
GO:0043093	FtsZ-dependent cytokinesis	undefined	14	0.1
GO:0044429	mitochondrial part	undefined	13	0.1
GO:0044429	mitochondrial part	undefined	13	0.1
GO:0044429	mitochondrial part	undefined	13	0.1
GO:0044429	mitochondrial part	undefined	13	0.1
GO:0005654	nucleoplasm	undefined	13	0.1
GO:0005654	nucleoplasm	undefined	13	0.1
GO:0044451	nucleoplasm part	undefined	13	0.1
GO:0044429	mitochondrial part	undefined	13	0.1
GO:0044429	mitochondrial part	undefined	13	0.1
GO:0044429	mitochondrial part	undefined	13	0.1
GO:0044429	mitochondrial part	undefined	13	0.1
GO:0005654	nucleoplasm	undefined	13	0.1
GO:0044451	nucleoplasm part	undefined	13	0.1
GO:0044429	mitochondrial part	undefined	13	0.1
GO:0098588	bounding membrane of organelle	undefined	13	0.1
GO:0044429	mitochondrial part	undefined	13	0.1
GO:0098588	bounding membrane of organelle	undefined	13	0.1
GO:0098805	whole membrane	undefined	13	0.1
GO:0004488	methylenetetrahydrofolate dehydrogenase (NADP+) activity	undefined	13	0.1
GO:0003684	damaged DNA binding	undefined	13	0.1
GO:0043021	ribonucleoprotein complex binding	undefined	13	0.1
GO:0015276	ligand-gated ion channel activity	undefined	13	0.1
GO:0015276	ligand-gated ion channel activity	undefined	13	0.1
GO:0019888	protein phosphatase regulator activity	undefined	13	0.1
GO:0072521	purine-containing compound metabolic process	undefined	13	0.1
GO:0072521	purine-containing compound metabolic process	undefined	13	0.1
GO:0006163	purine nucleotide metabolic process	undefined	13	0.1
GO:0072521	purine-containing compound metabolic process	undefined	13	0.1
GO:0006163	purine nucleotide metabolic process	undefined	13	0.1
GO:0006753	nucleoside phosphate metabolic process	undefined	13	0.1
GO:0019693	ribose phosphate metabolic process	undefined	13	0.1
GO:0006753	nucleoside phosphate metabolic process	undefined	13	0.1
GO:0019693	ribose phosphate metabolic process	undefined	13	0.1
GO:0009108	coenzyme biosynthetic process	undefined	13	0.1
GO:0009108	coenzyme biosynthetic process	undefined	13	0.1
GO:0009108	coenzyme biosynthetic process	undefined	13	0.1
GO:0072521	purine-containing compound metabolic process	undefined	13	0.1
GO:0006163	purine nucleotide metabolic process	undefined	13	0.1
GO:0072521	purine-containing compound metabolic process	undefined	13	0.1
GO:0006163	purine nucleotide metabolic process	undefined	13	0.1
GO:0072521	purine-containing compound metabolic process	undefined	13	0.1
GO:0006163	purine nucleotide metabolic process	undefined	13	0.1
GO:0006753	nucleoside phosphate metabolic process	undefined	13	0.1
GO:0009117	nucleotide metabolic process	undefined	13	0.1
GO:0019693	ribose phosphate metabolic process	undefined	13	0.1
GO:0019693	ribose phosphate metabolic process	undefined	13	0.1
GO:0009259	ribonucleotide metabolic process	undefined	13	0.1
GO:0072521	purine-containing compound metabolic process	undefined	13	0.1
GO:0006163	purine nucleotide metabolic process	undefined	13	0.1
GO:0006753	nucleoside phosphate metabolic process	undefined	13	0.1
GO:0009108	coenzyme biosynthetic process	undefined	13	0.1
GO:0006753	nucleoside phosphate metabolic process	undefined	13	0.1
GO:0009117	nucleotide metabolic process	undefined	13	0.1
GO:0072521	purine-containing compound metabolic process	undefined	13	0.1
GO:0006163	purine nucleotide metabolic process	undefined	13	0.1
GO:0006753	nucleoside phosphate metabolic process	undefined	13	0.1
GO:0019693	ribose phosphate metabolic process	undefined	13	0.1
GO:0006753	nucleoside phosphate metabolic process	undefined	13	0.1
GO:0019693	ribose phosphate metabolic process	undefined	13	0.1
GO:0009108	coenzyme biosynthetic process	undefined	13	0.1
GO:0009108	coenzyme biosynthetic process	undefined	13	0.1
GO:0009108	coenzyme biosynthetic process	undefined	13	0.1
GO:0051493	regulation of cytoskeleton organization	undefined	13	0.1
GO:0051493	regulation of cytoskeleton organization	undefined	13	0.1
GO:0034220	ion transmembrane transport	undefined	13	0.1
GO:0034220	ion transmembrane transport	undefined	13	0.1
GO:0009653	anatomical structure morphogenesis	undefined	13	0.1
GO:0009653	anatomical structure morphogenesis	undefined	13	0.1
GO:0030684	preribosome	undefined	12	0.1
GO:0032040	small-subunit processome	undefined	12	0.1
GO:0016628	oxidoreductase activity, acting on the CH-CH group of donors, NAD or NADP as acceptor	undefined	12	0.1
GO:0051213	dioxygenase activity	undefined	12	0.1
GO:0016702	oxidoreductase activity, acting on single donors with incorporation of molecular oxygen, incorporation of two atoms of oxygen	undefined	12	0.1
GO:0016702	oxidoreductase activity, acting on single donors with incorporation of molecular oxygen, incorporation of two atoms of oxygen	undefined	12	0.1
GO:0016670	oxidoreductase activity, acting on a sulfur group of donors, oxygen as acceptor	undefined	12	0.1
GO:0015036	disulfide oxidoreductase activity	undefined	12	0.1
GO:0015035	protein disulfide oxidoreductase activity	undefined	12	0.1
GO:0008175	tRNA methyltransferase activity	undefined	12	0.1
GO:0008175	tRNA methyltransferase activity	undefined	12	0.1
GO:0004519	endonuclease activity	undefined	12	0.1
GO:0019239	deaminase activity	undefined	12	0.1
GO:0016846	carbon-sulfur lyase activity	undefined	12	0.1
GO:0016860	intramolecular oxidoreductase activity	undefined	12	0.1
GO:0008716	D-alanine-D-alanine ligase activity	undefined	12	0.1
GO:1901682	sulfur compound transmembrane transporter activity	undefined	12	0.1
GO:0005338	nucleotide-sugar transmembrane transporter activity	undefined	12	0.1
GO:0005338	nucleotide-sugar transmembrane transporter activity	undefined	12	0.1
GO:0015165	pyrimidine nucleotide-sugar transmembrane transporter activity	undefined	12	0.1
GO:0045017	glycerolipid biosynthetic process	undefined	12	0.1
GO:0008654	phospholipid biosynthetic process	undefined	12	0.1
GO:0045017	glycerolipid biosynthetic process	undefined	12	0.1
GO:0046474	glycerophospholipid biosynthetic process	undefined	12	0.1
GO:0008654	phospholipid biosynthetic process	undefined	12	0.1
GO:0046474	glycerophospholipid biosynthetic process	undefined	12	0.1
GO:0010605	negative regulation of macromolecule metabolic process	undefined	12	0.1
GO:0010605	negative regulation of macromolecule metabolic process	undefined	12	0.1
GO:0010629	negative regulation of gene expression	undefined	12	0.1
GO:0016569	covalent chromatin modification	undefined	12	0.1
GO:0008654	phospholipid biosynthetic process	undefined	12	0.1
GO:0009123	nucleoside monophosphate metabolic process	undefined	12	0.1
GO:0008654	phospholipid biosynthetic process	undefined	12	0.1
GO:0008654	phospholipid biosynthetic process	undefined	12	0.1
GO:0045017	glycerolipid biosynthetic process	undefined	12	0.1
GO:0008654	phospholipid biosynthetic process	undefined	12	0.1
GO:0008654	phospholipid biosynthetic process	undefined	12	0.1
GO:0010629	negative regulation of gene expression	undefined	12	0.1
GO:0010605	negative regulation of macromolecule metabolic process	undefined	12	0.1
GO:0009892	negative regulation of metabolic process	undefined	12	0.1
GO:0009892	negative regulation of metabolic process	undefined	12	0.1
GO:0045017	glycerolipid biosynthetic process	undefined	12	0.1
GO:0046474	glycerophospholipid biosynthetic process	undefined	12	0.1
GO:0008654	phospholipid biosynthetic process	undefined	12	0.1
GO:0046474	glycerophospholipid biosynthetic process	undefined	12	0.1
GO:0008654	phospholipid biosynthetic process	undefined	12	0.1
GO:0045017	glycerolipid biosynthetic process	undefined	12	0.1
GO:0008654	phospholipid biosynthetic process	undefined	12	0.1
GO:0009123	nucleoside monophosphate metabolic process	undefined	12	0.1
GO:0045017	glycerolipid biosynthetic process	undefined	12	0.1
GO:0008654	phospholipid biosynthetic process	undefined	12	0.1
GO:0045017	glycerolipid biosynthetic process	undefined	12	0.1
GO:0046474	glycerophospholipid biosynthetic process	undefined	12	0.1
GO:0008654	phospholipid biosynthetic process	undefined	12	0.1
GO:0046474	glycerophospholipid biosynthetic process	undefined	12	0.1
GO:0007030	Golgi organization	undefined	12	0.1
GO:0007030	Golgi organization	undefined	12	0.1
GO:0016569	covalent chromatin modification	undefined	12	0.1
GO:0016570	histone modification	undefined	12	0.1
GO:0051640	organelle localization	undefined	12	0.1
GO:0015711	organic anion transport	undefined	12	0.1
GO:0015849	organic acid transport	undefined	12	0.1
GO:0006820	anion transport	undefined	12	0.1
GO:0010605	negative regulation of macromolecule metabolic process	undefined	12	0.1
GO:0009892	negative regulation of metabolic process	undefined	12	0.1
GO:0009892	negative regulation of metabolic process	undefined	12	0.1
GO:0010605	negative regulation of macromolecule metabolic process	undefined	12	0.1
GO:0007030	Golgi organization	undefined	12	0.1
GO:0016569	covalent chromatin modification	undefined	12	0.1
GO:0016570	histone modification	undefined	12	0.1
GO:0009892	negative regulation of metabolic process	undefined	12	0.1
GO:0010605	negative regulation of macromolecule metabolic process	undefined	12	0.1
GO:0010629	negative regulation of gene expression	undefined	12	0.1
GO:0005740	mitochondrial envelope	undefined	11	0.1
GO:0031966	mitochondrial membrane	undefined	11	0.1
GO:0005740	mitochondrial envelope	undefined	11	0.1
GO:0031966	mitochondrial membrane	undefined	11	0.1
GO:0005740	mitochondrial envelope	undefined	11	0.1
GO:0005740	mitochondrial envelope	undefined	11	0.1
GO:0031966	mitochondrial membrane	undefined	11	0.1
GO:0031226	intrinsic component of plasma membrane	undefined	11	0.1
GO:0005740	mitochondrial envelope	undefined	11	0.1
GO:0031226	intrinsic component of plasma membrane	undefined	11	0.1
GO:0071821	FANCM-MHF complex	undefined	11	0.1
GO:0005740	mitochondrial envelope	undefined	11	0.1
GO:0031966	mitochondrial membrane	undefined	11	0.1
GO:0005740	mitochondrial envelope	undefined	11	0.1
GO:0005740	mitochondrial envelope	undefined	11	0.1
GO:0031966	mitochondrial membrane	undefined	11	0.1
GO:0005740	mitochondrial envelope	undefined	11	0.1
GO:0031966	mitochondrial membrane	undefined	11	0.1
GO:0031966	mitochondrial membrane	undefined	11	0.1
GO:0005740	mitochondrial envelope	undefined	11	0.1
GO:0031966	mitochondrial membrane	undefined	11	0.1
GO:0015630	microtubule cytoskeleton	undefined	11	0.1
GO:0031966	mitochondrial membrane	undefined	11	0.1
GO:0005887	integral component of plasma membrane	undefined	11	0.1
GO:0031226	intrinsic component of plasma membrane	undefined	11	0.1
GO:0005887	integral component of plasma membrane	undefined	11	0.1
GO:0031226	intrinsic component of plasma membrane	undefined	11	0.1
GO:0031966	mitochondrial membrane	undefined	11	0.1
GO:0031226	intrinsic component of plasma membrane	undefined	11	0.1
GO:0005887	integral component of plasma membrane	undefined	11	0.1
GO:0031226	intrinsic component of plasma membrane	undefined	11	0.1
GO:0005887	integral component of plasma membrane	undefined	11	0.1
GO:0031226	intrinsic component of plasma membrane	undefined	11	0.1
GO:0019028	viral capsid	undefined	11	0.1
GO:0019028	viral capsid	undefined	11	0.1
GO:0004499	N,N-dimethylaniline monooxygenase activity	undefined	11	0.1
GO:0016780	phosphotransferase activity, for other substituted phosphate groups	undefined	11	0.1
GO:0008170	N-methyltransferase activity	undefined	11	0.1
GO:0002161	aminoacyl-tRNA editing activity	undefined	11	0.1
GO:0016423	tRNA (guanine) methyltransferase activity	undefined	11	0.1
GO:0016423	tRNA (guanine) methyltransferase activity	undefined	11	0.1
GO:0002161	aminoacyl-tRNA editing activity	undefined	11	0.1
GO:0070001	aspartic-type peptidase activity	undefined	11	0.1
GO:0042054	histone methyltransferase activity	undefined	11	0.1
GO:0018024	histone-lysine N-methyltransferase activity	undefined	11	0.1
GO:0016279	protein-lysine N-methyltransferase activity	undefined	11	0.1
GO:0018024	histone-lysine N-methyltransferase activity	undefined	11	0.1
GO:0004843	thiol-dependent ubiquitin-specific protease activity	undefined	11	0.1
GO:0046906	tetrapyrrole binding	undefined	11	0.1
GO:0046906	tetrapyrrole binding	undefined	11	0.1
GO:0000062	fatty-acyl-CoA binding	undefined	11	0.1
GO:0000062	fatty-acyl-CoA binding	undefined	11	0.1
GO:1901567	fatty acid derivative binding	undefined	11	0.1
GO:0000062	fatty-acyl-CoA binding	undefined	11	0.1
GO:0000062	fatty-acyl-CoA binding	undefined	11	0.1
GO:0000062	fatty-acyl-CoA binding	undefined	11	0.1
GO:0015116	sulfate transmembrane transporter activity	undefined	11	0.1
GO:0015116	sulfate transmembrane transporter activity	undefined	11	0.1
GO:0060590	ATPase regulator activity	undefined	11	0.1
GO:0042158	lipoprotein biosynthetic process	undefined	11	0.1
GO:0006643	membrane lipid metabolic process	undefined	11	0.1
GO:0046467	membrane lipid biosynthetic process	undefined	11	0.1
GO:0006664	glycolipid metabolic process	undefined	11	0.1
GO:0042158	lipoprotein biosynthetic process	undefined	11	0.1
GO:0046467	membrane lipid biosynthetic process	undefined	11	0.1
GO:0009247	glycolipid biosynthetic process	undefined	11	0.1
GO:0017144	drug metabolic process	undefined	11	0.1
GO:0042157	lipoprotein metabolic process	undefined	11	0.1
GO:0051604	protein maturation	undefined	11	0.1
GO:0042158	lipoprotein biosynthetic process	undefined	11	0.1
GO:0051604	protein maturation	undefined	11	0.1
GO:0042157	lipoprotein metabolic process	undefined	11	0.1
GO:0051604	protein maturation	undefined	11	0.1
GO:1903509	liposaccharide metabolic process	undefined	11	0.1
GO:0006664	glycolipid metabolic process	undefined	11	0.1
GO:0046467	membrane lipid biosynthetic process	undefined	11	0.1
GO:0042158	lipoprotein biosynthetic process	undefined	11	0.1
GO:0009247	glycolipid biosynthetic process	undefined	11	0.1
GO:0046467	membrane lipid biosynthetic process	undefined	11	0.1
GO:0009247	glycolipid biosynthetic process	undefined	11	0.1
GO:1903509	liposaccharide metabolic process	undefined	11	0.1
GO:0042158	lipoprotein biosynthetic process	undefined	11	0.1
GO:0006643	membrane lipid metabolic process	undefined	11	0.1
GO:1903509	liposaccharide metabolic process	undefined	11	0.1
GO:0006664	glycolipid metabolic process	undefined	11	0.1
GO:0046467	membrane lipid biosynthetic process	undefined	11	0.1
GO:0042157	lipoprotein metabolic process	undefined	11	0.1
GO:0042158	lipoprotein biosynthetic process	undefined	11	0.1
GO:0051604	protein maturation	undefined	11	0.1
GO:0042158	lipoprotein biosynthetic process	undefined	11	0.1
GO:0046467	membrane lipid biosynthetic process	undefined	11	0.1
GO:0009247	glycolipid biosynthetic process	undefined	11	0.1
GO:0042158	lipoprotein biosynthetic process	undefined	11	0.1
GO:0009247	glycolipid biosynthetic process	undefined	11	0.1
GO:0046467	membrane lipid biosynthetic process	undefined	11	0.1
GO:0042158	lipoprotein biosynthetic process	undefined	11	0.1
GO:0006643	membrane lipid metabolic process	undefined	11	0.1
GO:0046467	membrane lipid biosynthetic process	undefined	11	0.1
GO:0006664	glycolipid metabolic process	undefined	11	0.1
GO:0042158	lipoprotein biosynthetic process	undefined	11	0.1
GO:0046467	membrane lipid biosynthetic process	undefined	11	0.1
GO:0009247	glycolipid biosynthetic process	undefined	11	0.1
GO:0017144	drug metabolic process	undefined	11	0.1
GO:0007029	endoplasmic reticulum organization	undefined	11	0.1
GO:0030036	actin cytoskeleton organization	undefined	11	0.1
GO:0007029	endoplasmic reticulum organization	undefined	11	0.1
GO:0097435	supramolecular fiber organization	undefined	11	0.1
GO:0007015	actin filament organization	undefined	11	0.1
GO:0008154	actin polymerization or depolymerization	undefined	11	0.1
GO:0140029	exocytic process	undefined	11	0.1
GO:0030029	actin filament-based process	undefined	11	0.1
GO:0030036	actin cytoskeleton organization	undefined	11	0.1
GO:0007015	actin filament organization	undefined	11	0.1
GO:0140029	exocytic process	undefined	11	0.1
GO:0006904	vesicle docking involved in exocytosis	undefined	11	0.1
GO:0022406	membrane docking	undefined	11	0.1
GO:0140056	organelle localization by membrane tethering	undefined	11	0.1
GO:0140056	organelle localization by membrane tethering	undefined	11	0.1
GO:0048278	vesicle docking	undefined	11	0.1
GO:0048278	vesicle docking	undefined	11	0.1
GO:0007029	endoplasmic reticulum organization	undefined	11	0.1
GO:0097435	supramolecular fiber organization	undefined	11	0.1
GO:0007015	actin filament organization	undefined	11	0.1
GO:0008154	actin polymerization or depolymerization	undefined	11	0.1
GO:0022610	biological adhesion	Biological Process	11	0.1
GO:0007155	cell adhesion	undefined	11	0.1
GO:0019867	outer membrane	undefined	10	0.1
GO:0015930	glutamate synthase activity	undefined	10	0.1
GO:0016972	thiol oxidase activity	undefined	10	0.1
GO:0016307	phosphatidylinositol phosphate kinase activity	undefined	10	0.1
GO:0016307	phosphatidylinositol phosphate kinase activity	undefined	10	0.1
GO:0061630	ubiquitin protein ligase activity	undefined	10	0.1
GO:0016814	hydrolase activity, acting on carbon-nitrogen (but not peptide) bonds, in cyclic amidines	undefined	10	0.1
GO:0061659	ubiquitin-like protein ligase activity	undefined	10	0.1
GO:0061630	ubiquitin protein ligase activity	undefined	10	0.1
GO:0061630	ubiquitin protein ligase activity	undefined	10	0.1
GO:0016857	racemase and epimerase activity, acting on carbohydrates and derivatives	undefined	10	0.1
GO:0016868	intramolecular transferase activity, phosphotransferases	undefined	10	0.1
GO:0051539	4 iron, 4 sulfur cluster binding	undefined	10	0.1
GO:0005337	nucleoside transmembrane transporter activity	undefined	10	0.1
GO:0005337	nucleoside transmembrane transporter activity	undefined	10	0.1
GO:0005319	lipid transporter activity	undefined	10	0.1
GO:0005092	GDP-dissociation inhibitor activity	undefined	10	0.1
GO:0043545	molybdopterin cofactor metabolic process	undefined	10	0.1
GO:0051189	prosthetic group metabolic process	undefined	10	0.1
GO:0016310	phosphorylation	undefined	10	0.1
GO:0043545	molybdopterin cofactor metabolic process	undefined	10	0.1
GO:0043545	molybdopterin cofactor metabolic process	undefined	10	0.1
GO:0051189	prosthetic group metabolic process	undefined	10	0.1
GO:0043545	molybdopterin cofactor metabolic process	undefined	10	0.1
GO:0043545	molybdopterin cofactor metabolic process	undefined	10	0.1
GO:0043545	molybdopterin cofactor metabolic process	undefined	10	0.1
GO:0098732	macromolecule deacylation	undefined	10	0.1
GO:0043545	molybdopterin cofactor metabolic process	undefined	10	0.1
GO:0009141	nucleoside triphosphate metabolic process	undefined	10	0.1
GO:0043545	molybdopterin cofactor metabolic process	undefined	10	0.1
GO:0043545	molybdopterin cofactor metabolic process	undefined	10	0.1
GO:0009141	nucleoside triphosphate metabolic process	undefined	10	0.1
GO:0051189	prosthetic group metabolic process	undefined	10	0.1
GO:0016310	phosphorylation	undefined	10	0.1
GO:0043545	molybdopterin cofactor metabolic process	undefined	10	0.1
GO:0043545	molybdopterin cofactor metabolic process	undefined	10	0.1
GO:0051189	prosthetic group metabolic process	undefined	10	0.1
GO:0043545	molybdopterin cofactor metabolic process	undefined	10	0.1
GO:0043545	molybdopterin cofactor metabolic process	undefined	10	0.1
GO:0071103	DNA conformation change	undefined	10	0.1
GO:0043254	regulation of protein complex assembly	undefined	10	0.1
GO:0071824	protein-DNA complex subunit organization	undefined	10	0.1
GO:0065004	protein-DNA complex assembly	undefined	10	0.1
GO:0043254	regulation of protein complex assembly	undefined	10	0.1
GO:1902903	regulation of supramolecular fiber organization	undefined	10	0.1
GO:0043254	regulation of protein complex assembly	undefined	10	0.1
GO:0110053	regulation of actin filament organization	undefined	10	0.1
GO:1902903	regulation of supramolecular fiber organization	undefined	10	0.1
GO:0110053	regulation of actin filament organization	undefined	10	0.1
GO:0032535	regulation of cellular component size	undefined	10	0.1
GO:0030832	regulation of actin filament length	undefined	10	0.1
GO:0008064	regulation of actin polymerization or depolymerization	undefined	10	0.1
GO:1902903	regulation of supramolecular fiber organization	undefined	10	0.1
GO:0043254	regulation of protein complex assembly	undefined	10	0.1
GO:0010564	regulation of cell cycle process	undefined	10	0.1
GO:0032970	regulation of actin filament-based process	undefined	10	0.1
GO:0032956	regulation of actin cytoskeleton organization	undefined	10	0.1
GO:0030832	regulation of actin filament length	undefined	10	0.1
GO:0110053	regulation of actin filament organization	undefined	10	0.1
GO:0010564	regulation of cell cycle process	undefined	10	0.1
GO:0010564	regulation of cell cycle process	undefined	10	0.1
GO:0010564	regulation of cell cycle process	undefined	10	0.1
GO:0110053	regulation of actin filament organization	undefined	10	0.1
GO:0032956	regulation of actin cytoskeleton organization	undefined	10	0.1
GO:0032970	regulation of actin filament-based process	undefined	10	0.1
GO:0090066	regulation of anatomical structure size	undefined	10	0.1
GO:0032535	regulation of cellular component size	undefined	10	0.1
GO:1902903	regulation of supramolecular fiber organization	undefined	10	0.1
GO:0043254	regulation of protein complex assembly	undefined	10	0.1
GO:0010564	regulation of cell cycle process	undefined	10	0.1
GO:0032970	regulation of actin filament-based process	undefined	10	0.1
GO:0032956	regulation of actin cytoskeleton organization	undefined	10	0.1
GO:0044087	regulation of cellular component biogenesis	undefined	10	0.1
GO:0043254	regulation of protein complex assembly	undefined	10	0.1
GO:0032271	regulation of protein polymerization	undefined	10	0.1
GO:0043254	regulation of protein complex assembly	undefined	10	0.1
GO:0071824	protein-DNA complex subunit organization	undefined	10	0.1
GO:0065004	protein-DNA complex assembly	undefined	10	0.1
GO:0043254	regulation of protein complex assembly	undefined	10	0.1
GO:1902903	regulation of supramolecular fiber organization	undefined	10	0.1
GO:0043254	regulation of protein complex assembly	undefined	10	0.1
GO:0110053	regulation of actin filament organization	undefined	10	0.1
GO:1902903	regulation of supramolecular fiber organization	undefined	10	0.1
GO:0110053	regulation of actin filament organization	undefined	10	0.1
GO:0032535	regulation of cellular component size	undefined	10	0.1
GO:0030832	regulation of actin filament length	undefined	10	0.1
GO:0008064	regulation of actin polymerization or depolymerization	undefined	10	0.1
GO:0044087	regulation of cellular component biogenesis	undefined	10	0.1
GO:1902903	regulation of supramolecular fiber organization	undefined	10	0.1
GO:0043254	regulation of protein complex assembly	undefined	10	0.1
GO:0010564	regulation of cell cycle process	undefined	10	0.1
GO:0032970	regulation of actin filament-based process	undefined	10	0.1
GO:0032956	regulation of actin cytoskeleton organization	undefined	10	0.1
GO:0030832	regulation of actin filament length	undefined	10	0.1
GO:0110053	regulation of actin filament organization	undefined	10	0.1
GO:0044087	regulation of cellular component biogenesis	undefined	10	0.1
GO:0043254	regulation of protein complex assembly	undefined	10	0.1
GO:0032271	regulation of protein polymerization	undefined	10	0.1
GO:0030833	regulation of actin filament polymerization	undefined	10	0.1
GO:0005783	endoplasmic reticulum	undefined	9	0.1
GO:0005783	endoplasmic reticulum	undefined	9	0.1
GO:0005783	endoplasmic reticulum	undefined	9	0.1
GO:0005815	microtubule organizing center	undefined	9	0.1
GO:0005783	endoplasmic reticulum	undefined	9	0.1
GO:0005783	endoplasmic reticulum	undefined	9	0.1
GO:0005783	endoplasmic reticulum	undefined	9	0.1
GO:0005815	microtubule organizing center	undefined	9	0.1
GO:0005815	microtubule organizing center	undefined	9	0.1
GO:0005783	endoplasmic reticulum	undefined	9	0.1
GO:0017150	tRNA dihydrouridine synthase activity	undefined	9	0.1
GO:0004506	squalene monooxygenase activity	undefined	9	0.1
GO:0004506	squalene monooxygenase activity	undefined	9	0.1
GO:0008443	phosphofructokinase activity	undefined	9	0.1
GO:0019200	carbohydrate kinase activity	undefined	9	0.1
GO:0008171	O-methyltransferase activity	undefined	9	0.1
GO:0004540	ribonuclease activity	undefined	9	0.1
GO:0017150	tRNA dihydrouridine synthase activity	undefined	9	0.1
GO:0004540	ribonuclease activity	undefined	9	0.1
GO:0070008	serine-type exopeptidase activity	undefined	9	0.1
GO:0098599	palmitoyl hydrolase activity	undefined	9	0.1
GO:0003697	single-stranded DNA binding	undefined	9	0.1
GO:0020037	heme binding	undefined	9	0.1
GO:0020037	heme binding	undefined	9	0.1
GO:0020037	heme binding	undefined	9	0.1
GO:0043022	ribosome binding	undefined	9	0.1
GO:0000077	DNA damage checkpoint	undefined	9	0.1
GO:0006777	Mo-molybdopterin cofactor biosynthetic process	undefined	9	0.1
GO:0019720	Mo-molybdopterin cofactor metabolic process	undefined	9	0.1
GO:0015074	DNA integration	undefined	9	0.1
GO:0006777	Mo-molybdopterin cofactor biosynthetic process	undefined	9	0.1
GO:0046034	ATP metabolic process	undefined	9	0.1
GO:0006777	Mo-molybdopterin cofactor biosynthetic process	undefined	9	0.1
GO:0006777	Mo-molybdopterin cofactor biosynthetic process	undefined	9	0.1
GO:0019720	Mo-molybdopterin cofactor metabolic process	undefined	9	0.1
GO:0006777	Mo-molybdopterin cofactor biosynthetic process	undefined	9	0.1
GO:0006777	Mo-molybdopterin cofactor biosynthetic process	undefined	9	0.1
GO:0019720	Mo-molybdopterin cofactor metabolic process	undefined	9	0.1
GO:0019720	Mo-molybdopterin cofactor metabolic process	undefined	9	0.1
GO:0006777	Mo-molybdopterin cofactor biosynthetic process	undefined	9	0.1
GO:0006777	Mo-molybdopterin cofactor biosynthetic process	undefined	9	0.1
GO:0006777	Mo-molybdopterin cofactor biosynthetic process	undefined	9	0.1
GO:0006777	Mo-molybdopterin cofactor biosynthetic process	undefined	9	0.1
GO:0019720	Mo-molybdopterin cofactor metabolic process	undefined	9	0.1
GO:0006777	Mo-molybdopterin cofactor biosynthetic process	undefined	9	0.1
GO:0006777	Mo-molybdopterin cofactor biosynthetic process	undefined	9	0.1
GO:0006777	Mo-molybdopterin cofactor biosynthetic process	undefined	9	0.1
GO:0006777	Mo-molybdopterin cofactor biosynthetic process	undefined	9	0.1
GO:0006777	Mo-molybdopterin cofactor biosynthetic process	undefined	9	0.1
GO:0015074	DNA integration	undefined	9	0.1
GO:0006777	Mo-molybdopterin cofactor biosynthetic process	undefined	9	0.1
GO:0046034	ATP metabolic process	undefined	9	0.1
GO:0048309	endoplasmic reticulum inheritance	undefined	9	0.1
GO:0007031	peroxisome organization	undefined	9	0.1
GO:0048308	organelle inheritance	undefined	9	0.1
GO:0048309	endoplasmic reticulum inheritance	undefined	9	0.1
GO:0048309	endoplasmic reticulum inheritance	undefined	9	0.1
GO:0032984	protein-containing complex disassembly	undefined	9	0.1
GO:0032989	cellular component morphogenesis	undefined	9	0.1
GO:0022411	cellular component disassembly	undefined	9	0.1
GO:0032984	protein-containing complex disassembly	undefined	9	0.1
GO:0043624	cellular protein complex disassembly	undefined	9	0.1
GO:0010948	negative regulation of cell cycle process	undefined	9	0.1
GO:0010948	negative regulation of cell cycle process	undefined	9	0.1
GO:0007346	regulation of mitotic cell cycle	undefined	9	0.1
GO:0010948	negative regulation of cell cycle process	undefined	9	0.1
GO:0010948	negative regulation of cell cycle process	undefined	9	0.1
GO:0010948	negative regulation of cell cycle process	undefined	9	0.1
GO:0010948	negative regulation of cell cycle process	undefined	9	0.1
GO:0010948	negative regulation of cell cycle process	undefined	9	0.1
GO:0007346	regulation of mitotic cell cycle	undefined	9	0.1
GO:0007346	regulation of mitotic cell cycle	undefined	9	0.1
GO:0010948	negative regulation of cell cycle process	undefined	9	0.1
GO:0010948	negative regulation of cell cycle process	undefined	9	0.1
GO:0031570	DNA integrity checkpoint	undefined	9	0.1
GO:0010948	negative regulation of cell cycle process	undefined	9	0.1
GO:0048869	cellular developmental process	undefined	9	0.1
GO:0032989	cellular component morphogenesis	undefined	9	0.1
GO:0007346	regulation of mitotic cell cycle	undefined	9	0.1
GO:0048309	endoplasmic reticulum inheritance	undefined	9	0.1
GO:0032984	protein-containing complex disassembly	undefined	9	0.1
GO:0032989	cellular component morphogenesis	undefined	9	0.1
GO:0022411	cellular component disassembly	undefined	9	0.1
GO:0032984	protein-containing complex disassembly	undefined	9	0.1
GO:0043624	cellular protein complex disassembly	undefined	9	0.1
GO:0010948	negative regulation of cell cycle process	undefined	9	0.1
GO:0010948	negative regulation of cell cycle process	undefined	9	0.1
GO:0007346	regulation of mitotic cell cycle	undefined	9	0.1
GO:0010948	negative regulation of cell cycle process	undefined	9	0.1
GO:0032989	cellular component morphogenesis	undefined	9	0.1
GO:0000902	cell morphogenesis	undefined	9	0.1
GO:0007275	multicellular organism development	undefined	9	0.1
GO:0032989	cellular component morphogenesis	undefined	9	0.1
GO:0000902	cell morphogenesis	undefined	9	0.1
GO:0048869	cellular developmental process	undefined	9	0.1
GO:0007275	multicellular organism development	undefined	9	0.1
GO:0031570	DNA integrity checkpoint	undefined	9	0.1
GO:0010948	negative regulation of cell cycle process	undefined	9	0.1
GO:0005773	vacuole	undefined	8	0.1
GO:0005773	vacuole	undefined	8	0.1
GO:0005773	vacuole	undefined	8	0.1
GO:0005773	vacuole	undefined	8	0.1
GO:0005773	vacuole	undefined	8	0.1
GO:0016651	oxidoreductase activity, acting on NAD(P)H	undefined	8	0.1
GO:0016624	oxidoreductase activity, acting on the aldehyde or oxo group of donors, disulfide as acceptor	undefined	8	0.1
GO:0046912	transferase activity, transferring acyl groups, acyl groups converted into alkyl on transfer	undefined	8	0.1
GO:0003847	1-alkyl-2-acetylglycerophosphocholine esterase activity	undefined	8	0.1
GO:0047465	N-acylglucosamine-6-phosphate 2-epimerase activity	undefined	8	0.1
GO:0016861	intramolecular oxidoreductase activity, interconverting aldoses and ketoses	undefined	8	0.1
GO:0031406	carboxylic acid binding	undefined	8	0.1
GO:0070403	NAD+ binding	undefined	8	0.1
GO:0070403	NAD+ binding	undefined	8	0.1
GO:0070403	NAD+ binding	undefined	8	0.1
GO:0043177	organic acid binding	undefined	8	0.1
GO:0031406	carboxylic acid binding	undefined	8	0.1
GO:0043015	gamma-tubulin binding	undefined	8	0.1
GO:0008514	organic anion transmembrane transporter activity	undefined	8	0.1
GO:0120013	intermembrane lipid transfer activity	undefined	8	0.1
GO:0008565	protein transporter activity	undefined	8	0.1
GO:0006952	defense response	undefined	8	0.1
GO:0042221	response to chemical	undefined	8	0.1
GO:0033044	regulation of chromosome organization	undefined	8	0.1
GO:0051494	negative regulation of cytoskeleton organization	undefined	8	0.1
GO:0032185	septin cytoskeleton organization	undefined	8	0.1
GO:0033044	regulation of chromosome organization	undefined	8	0.1
GO:0051783	regulation of nuclear division	undefined	8	0.1
GO:0000921	septin ring assembly	undefined	8	0.1
GO:0051494	negative regulation of cytoskeleton organization	undefined	8	0.1
GO:0000921	septin ring assembly	undefined	8	0.1
GO:0033044	regulation of chromosome organization	undefined	8	0.1
GO:0051783	regulation of nuclear division	undefined	8	0.1
GO:0051494	negative regulation of cytoskeleton organization	undefined	8	0.1
GO:0045930	negative regulation of mitotic cell cycle	undefined	8	0.1
GO:0033045	regulation of sister chromatid segregation	undefined	8	0.1
GO:0007088	regulation of mitotic nuclear division	undefined	8	0.1
GO:1905818	regulation of chromosome separation	undefined	8	0.1
GO:1901987	regulation of cell cycle phase transition	undefined	8	0.1
GO:1901990	regulation of mitotic cell cycle phase transition	undefined	8	0.1
GO:0007088	regulation of mitotic nuclear division	undefined	8	0.1
GO:0045930	negative regulation of mitotic cell cycle	undefined	8	0.1
GO:0051983	regulation of chromosome segregation	undefined	8	0.1
GO:1905818	regulation of chromosome separation	undefined	8	0.1
GO:0010965	regulation of mitotic sister chromatid separation	undefined	8	0.1
GO:0033045	regulation of sister chromatid segregation	undefined	8	0.1
GO:0033047	regulation of mitotic sister chromatid segregation	undefined	8	0.1
GO:0044784	metaphase/anaphase transition of cell cycle	undefined	8	0.1
GO:1902099	regulation of metaphase/anaphase transition of cell cycle	undefined	8	0.1
GO:0051304	chromosome separation	undefined	8	0.1
GO:0051306	mitotic sister chromatid separation	undefined	8	0.1
GO:1905818	regulation of chromosome separation	undefined	8	0.1
GO:0051306	mitotic sister chromatid separation	undefined	8	0.1
GO:0044772	mitotic cell cycle phase transition	undefined	8	0.1
GO:0007093	mitotic cell cycle checkpoint	undefined	8	0.1
GO:0007088	regulation of mitotic nuclear division	undefined	8	0.1
GO:1905818	regulation of chromosome separation	undefined	8	0.1
GO:1901987	regulation of cell cycle phase transition	undefined	8	0.1
GO:0044770	cell cycle phase transition	undefined	8	0.1
GO:0044784	metaphase/anaphase transition of cell cycle	undefined	8	0.1
GO:1901987	regulation of cell cycle phase transition	undefined	8	0.1
GO:0044772	mitotic cell cycle phase transition	undefined	8	0.1
GO:0045930	negative regulation of mitotic cell cycle	undefined	8	0.1
GO:0007093	mitotic cell cycle checkpoint	undefined	8	0.1
GO:0045930	negative regulation of mitotic cell cycle	undefined	8	0.1
GO:0033045	regulation of sister chromatid segregation	undefined	8	0.1
GO:0007088	regulation of mitotic nuclear division	undefined	8	0.1
GO:1905818	regulation of chromosome separation	undefined	8	0.1
GO:1901987	regulation of cell cycle phase transition	undefined	8	0.1
GO:1901990	regulation of mitotic cell cycle phase transition	undefined	8	0.1
GO:0007088	regulation of mitotic nuclear division	undefined	8	0.1
GO:0045930	negative regulation of mitotic cell cycle	undefined	8	0.1
GO:0044772	mitotic cell cycle phase transition	undefined	8	0.1
GO:0007093	mitotic cell cycle checkpoint	undefined	8	0.1
GO:0045930	negative regulation of mitotic cell cycle	undefined	8	0.1
GO:0045930	negative regulation of mitotic cell cycle	undefined	8	0.1
GO:0007093	mitotic cell cycle checkpoint	undefined	8	0.1
GO:0051304	chromosome separation	undefined	8	0.1
GO:0051306	mitotic sister chromatid separation	undefined	8	0.1
GO:0010965	regulation of mitotic sister chromatid separation	undefined	8	0.1
GO:1905818	regulation of chromosome separation	undefined	8	0.1
GO:0033045	regulation of sister chromatid segregation	undefined	8	0.1
GO:0051306	mitotic sister chromatid separation	undefined	8	0.1
GO:0044772	mitotic cell cycle phase transition	undefined	8	0.1
GO:0007091	metaphase/anaphase transition of mitotic cell cycle	undefined	8	0.1
GO:1901990	regulation of mitotic cell cycle phase transition	undefined	8	0.1
GO:0051306	mitotic sister chromatid separation	undefined	8	0.1
GO:0033047	regulation of mitotic sister chromatid segregation	undefined	8	0.1
GO:0007088	regulation of mitotic nuclear division	undefined	8	0.1
GO:0007093	mitotic cell cycle checkpoint	undefined	8	0.1
GO:0007088	regulation of mitotic nuclear division	undefined	8	0.1
GO:0033047	regulation of mitotic sister chromatid segregation	undefined	8	0.1
GO:1905818	regulation of chromosome separation	undefined	8	0.1
GO:1901987	regulation of cell cycle phase transition	undefined	8	0.1
GO:1901990	regulation of mitotic cell cycle phase transition	undefined	8	0.1
GO:1902099	regulation of metaphase/anaphase transition of cell cycle	undefined	8	0.1
GO:0044770	cell cycle phase transition	undefined	8	0.1
GO:0044784	metaphase/anaphase transition of cell cycle	undefined	8	0.1
GO:0007091	metaphase/anaphase transition of mitotic cell cycle	undefined	8	0.1
GO:1902099	regulation of metaphase/anaphase transition of cell cycle	undefined	8	0.1
GO:1901987	regulation of cell cycle phase transition	undefined	8	0.1
GO:1901990	regulation of mitotic cell cycle phase transition	undefined	8	0.1
GO:1902099	regulation of metaphase/anaphase transition of cell cycle	undefined	8	0.1
GO:0044772	mitotic cell cycle phase transition	undefined	8	0.1
GO:1901990	regulation of mitotic cell cycle phase transition	undefined	8	0.1
GO:0007093	mitotic cell cycle checkpoint	undefined	8	0.1
GO:0045930	negative regulation of mitotic cell cycle	undefined	8	0.1
GO:0007093	mitotic cell cycle checkpoint	undefined	8	0.1
GO:0007093	mitotic cell cycle checkpoint	undefined	8	0.1
GO:0051983	regulation of chromosome segregation	undefined	8	0.1
GO:0033045	regulation of sister chromatid segregation	undefined	8	0.1
GO:0033047	regulation of mitotic sister chromatid segregation	undefined	8	0.1
GO:0044784	metaphase/anaphase transition of cell cycle	undefined	8	0.1
GO:1902099	regulation of metaphase/anaphase transition of cell cycle	undefined	8	0.1
GO:0051304	chromosome separation	undefined	8	0.1
GO:1905818	regulation of chromosome separation	undefined	8	0.1
GO:0006865	amino acid transport	undefined	8	0.1
GO:1903825	organic acid transmembrane transport	undefined	8	0.1
GO:0051983	regulation of chromosome segregation	undefined	8	0.1
GO:1905818	regulation of chromosome separation	undefined	8	0.1
GO:0033045	regulation of sister chromatid segregation	undefined	8	0.1
GO:0000921	septin ring assembly	undefined	8	0.1
GO:0033044	regulation of chromosome organization	undefined	8	0.1
GO:0051783	regulation of nuclear division	undefined	8	0.1
GO:0051494	negative regulation of cytoskeleton organization	undefined	8	0.1
GO:0000921	septin ring assembly	undefined	8	0.1
GO:0045930	negative regulation of mitotic cell cycle	undefined	8	0.1
GO:0033045	regulation of sister chromatid segregation	undefined	8	0.1
GO:0007088	regulation of mitotic nuclear division	undefined	8	0.1
GO:1905818	regulation of chromosome separation	undefined	8	0.1
GO:1901987	regulation of cell cycle phase transition	undefined	8	0.1
GO:1901990	regulation of mitotic cell cycle phase transition	undefined	8	0.1
GO:0007088	regulation of mitotic nuclear division	undefined	8	0.1
GO:0045930	negative regulation of mitotic cell cycle	undefined	8	0.1
GO:0051983	regulation of chromosome segregation	undefined	8	0.1
GO:1905818	regulation of chromosome separation	undefined	8	0.1
GO:0010965	regulation of mitotic sister chromatid separation	undefined	8	0.1
GO:0033045	regulation of sister chromatid segregation	undefined	8	0.1
GO:0033047	regulation of mitotic sister chromatid segregation	undefined	8	0.1
GO:0044784	metaphase/anaphase transition of cell cycle	undefined	8	0.1
GO:1902099	regulation of metaphase/anaphase transition of cell cycle	undefined	8	0.1
GO:0045930	negative regulation of mitotic cell cycle	undefined	8	0.1
GO:0007093	mitotic cell cycle checkpoint	undefined	8	0.1
GO:0045930	negative regulation of mitotic cell cycle	undefined	8	0.1
GO:0007093	mitotic cell cycle checkpoint	undefined	8	0.1
GO:0044437	vacuolar part	undefined	7	0.1
GO:0000221	vacuolar proton-transporting V-type ATPase, V1 domain	undefined	7	0.1
GO:0016471	vacuolar proton-transporting V-type ATPase complex	undefined	7	0.1
GO:0005774	vacuolar membrane	undefined	7	0.1
GO:0044437	vacuolar part	undefined	7	0.1
GO:0044437	vacuolar part	undefined	7	0.1
GO:0044437	vacuolar part	undefined	7	0.1
GO:0000221	vacuolar proton-transporting V-type ATPase, V1 domain	undefined	7	0.1
GO:0016471	vacuolar proton-transporting V-type ATPase complex	undefined	7	0.1
GO:0005774	vacuolar membrane	undefined	7	0.1
GO:0044437	vacuolar part	undefined	7	0.1
GO:0016469	proton-transporting two-sector ATPase complex	undefined	7	0.1
GO:0033176	proton-transporting V-type ATPase complex	undefined	7	0.1
GO:0016471	vacuolar proton-transporting V-type ATPase complex	undefined	7	0.1
GO:0033180	proton-transporting V-type ATPase, V1 domain	undefined	7	0.1
GO:0033178	proton-transporting two-sector ATPase complex, catalytic domain	undefined	7	0.1
GO:0033180	proton-transporting V-type ATPase, V1 domain	undefined	7	0.1
GO:0033178	proton-transporting two-sector ATPase complex, catalytic domain	undefined	7	0.1
GO:0044437	vacuolar part	undefined	7	0.1
GO:0044437	vacuolar part	undefined	7	0.1
GO:0000221	vacuolar proton-transporting V-type ATPase, V1 domain	undefined	7	0.1
GO:0016471	vacuolar proton-transporting V-type ATPase complex	undefined	7	0.1
GO:0005774	vacuolar membrane	undefined	7	0.1
GO:0044437	vacuolar part	undefined	7	0.1
GO:0000221	vacuolar proton-transporting V-type ATPase, V1 domain	undefined	7	0.1
GO:0016471	vacuolar proton-transporting V-type ATPase complex	undefined	7	0.1
GO:0005774	vacuolar membrane	undefined	7	0.1
GO:0005774	vacuolar membrane	undefined	7	0.1
GO:0044437	vacuolar part	undefined	7	0.1
GO:0005774	vacuolar membrane	undefined	7	0.1
GO:0016471	vacuolar proton-transporting V-type ATPase complex	undefined	7	0.1
GO:0016469	proton-transporting two-sector ATPase complex	undefined	7	0.1
GO:0033176	proton-transporting V-type ATPase complex	undefined	7	0.1
GO:0033178	proton-transporting two-sector ATPase complex, catalytic domain	undefined	7	0.1
GO:0033178	proton-transporting two-sector ATPase complex, catalytic domain	undefined	7	0.1
GO:0005774	vacuolar membrane	undefined	7	0.1
GO:0016471	vacuolar proton-transporting V-type ATPase complex	undefined	7	0.1
GO:0016634	oxidoreductase activity, acting on the CH-CH group of donors, oxygen as acceptor	undefined	7	0.1
GO:0015002	heme-copper terminal oxidase activity	undefined	7	0.1
GO:0051920	peroxiredoxin activity	undefined	7	0.1
GO:0004312	fatty acid synthase activity	undefined	7	0.1
GO:0016755	transferase activity, transferring amino-acyl groups	undefined	7	0.1
GO:0070569	uridylyltransferase activity	undefined	7	0.1
GO:0008378	galactosyltransferase activity	undefined	7	0.1
GO:0003950	NAD+ ADP-ribosyltransferase activity	undefined	7	0.1
GO:0003879	ATP phosphoribosyltransferase activity	undefined	7	0.1
GO:0016742	hydroxymethyl-, formyl- and related transferase activity	undefined	7	0.1
GO:0050694	galactose 3-O-sulfotransferase activity	undefined	7	0.1
GO:0004521	endoribonuclease activity	undefined	7	0.1
GO:0016298	lipase activity	undefined	7	0.1
GO:0004852	uroporphyrinogen-III synthase activity	undefined	7	0.1
GO:0016840	carbon-nitrogen lyase activity	undefined	7	0.1
GO:0016755	transferase activity, transferring amino-acyl groups	undefined	7	0.1
GO:0016872	intramolecular lyase activity	undefined	7	0.1
GO:0016884	carbon-nitrogen ligase activity, with glutamine as amido-N-donor	undefined	7	0.1
GO:0016880	acid-ammonia (or amide) ligase activity	undefined	7	0.1
GO:0016211	ammonia ligase activity	undefined	7	0.1
GO:0016886	ligase activity, forming phosphoric ester bonds	undefined	7	0.1
GO:0000150	recombinase activity	undefined	7	0.1
GO:0019843	rRNA binding	undefined	7	0.1
GO:0008312	7S RNA binding	undefined	7	0.1
GO:0019843	rRNA binding	undefined	7	0.1
GO:0008312	7S RNA binding	undefined	7	0.1
GO:0044389	ubiquitin-like protein ligase binding	undefined	7	0.1
GO:0031625	ubiquitin protein ligase binding	undefined	7	0.1
GO:0030247	polysaccharide binding	undefined	7	0.1
GO:0001871	pattern binding	undefined	7	0.1
GO:0030247	polysaccharide binding	undefined	7	0.1
GO:0051920	peroxiredoxin activity	undefined	7	0.1
GO:0015098	molybdate ion transmembrane transporter activity	undefined	7	0.1
GO:0005261	cation channel activity	undefined	7	0.1
GO:0005261	cation channel activity	undefined	7	0.1
GO:0008519	ammonium transmembrane transporter activity	undefined	7	0.1
GO:0005244	voltage-gated ion channel activity	undefined	7	0.1
GO:0005261	cation channel activity	undefined	7	0.1
GO:0061134	peptidase regulator activity	undefined	7	0.1
GO:0030414	peptidase inhibitor activity	undefined	7	0.1
GO:0030414	peptidase inhibitor activity	undefined	7	0.1
GO:0005086	ARF guanyl-nucleotide exchange factor activity	undefined	7	0.1
GO:0007166	cell surface receptor signaling pathway	undefined	7	0.1
GO:0030258	lipid modification	undefined	7	0.1
GO:0046834	lipid phosphorylation	undefined	7	0.1
GO:0006720	isoprenoid metabolic process	undefined	7	0.1
GO:0008299	isoprenoid biosynthetic process	undefined	7	0.1
GO:0008299	isoprenoid biosynthetic process	undefined	7	0.1
GO:0008299	isoprenoid biosynthetic process	undefined	7	0.1
GO:0008299	isoprenoid biosynthetic process	undefined	7	0.1
GO:0030258	lipid modification	undefined	7	0.1
GO:0006720	isoprenoid metabolic process	undefined	7	0.1
GO:0008299	isoprenoid biosynthetic process	undefined	7	0.1
GO:0008299	isoprenoid biosynthetic process	undefined	7	0.1
GO:0008299	isoprenoid biosynthetic process	undefined	7	0.1
GO:0030258	lipid modification	undefined	7	0.1
GO:0046834	lipid phosphorylation	undefined	7	0.1
GO:0006720	isoprenoid metabolic process	undefined	7	0.1
GO:0008299	isoprenoid biosynthetic process	undefined	7	0.1
GO:0008299	isoprenoid biosynthetic process	undefined	7	0.1
GO:0007166	cell surface receptor signaling pathway	undefined	7	0.1
GO:2001251	negative regulation of chromosome organization	undefined	7	0.1
GO:0016559	peroxisome fission	undefined	7	0.1
GO:0016559	peroxisome fission	undefined	7	0.1
GO:0061024	membrane organization	undefined	7	0.1
GO:0031023	microtubule organizing center organization	undefined	7	0.1
GO:2001251	negative regulation of chromosome organization	undefined	7	0.1
GO:0051784	negative regulation of nuclear division	undefined	7	0.1
GO:0051985	negative regulation of chromosome segregation	undefined	7	0.1
GO:0033046	negative regulation of sister chromatid segregation	undefined	7	0.1
GO:1905819	negative regulation of chromosome separation	undefined	7	0.1
GO:0007166	cell surface receptor signaling pathway	undefined	7	0.1
GO:1905819	negative regulation of chromosome separation	undefined	7	0.1
GO:0033046	negative regulation of sister chromatid segregation	undefined	7	0.1
GO:0051985	negative regulation of chromosome segregation	undefined	7	0.1
GO:1905819	negative regulation of chromosome separation	undefined	7	0.1
GO:1905819	negative regulation of chromosome separation	undefined	7	0.1
GO:1901988	negative regulation of cell cycle phase transition	undefined	7	0.1
GO:1901988	negative regulation of cell cycle phase transition	undefined	7	0.1
GO:0045839	negative regulation of mitotic nuclear division	undefined	7	0.1
GO:1905819	negative regulation of chromosome separation	undefined	7	0.1
GO:0033046	negative regulation of sister chromatid segregation	undefined	7	0.1
GO:1901988	negative regulation of cell cycle phase transition	undefined	7	0.1
GO:0045839	negative regulation of mitotic nuclear division	undefined	7	0.1
GO:1905819	negative regulation of chromosome separation	undefined	7	0.1
GO:0033046	negative regulation of sister chromatid segregation	undefined	7	0.1
GO:1901991	negative regulation of mitotic cell cycle phase transition	undefined	7	0.1
GO:0045839	negative regulation of mitotic nuclear division	undefined	7	0.1
GO:1901991	negative regulation of mitotic cell cycle phase transition	undefined	7	0.1
GO:0045839	negative regulation of mitotic nuclear division	undefined	7	0.1
GO:2000816	negative regulation of mitotic sister chromatid separation	undefined	7	0.1
GO:1905819	negative regulation of chromosome separation	undefined	7	0.1
GO:1905819	negative regulation of chromosome separation	undefined	7	0.1
GO:0033046	negative regulation of sister chromatid segregation	undefined	7	0.1
GO:2000816	negative regulation of mitotic sister chromatid separation	undefined	7	0.1
GO:1901991	negative regulation of mitotic cell cycle phase transition	undefined	7	0.1
GO:0033048	negative regulation of mitotic sister chromatid segregation	undefined	7	0.1
GO:0045839	negative regulation of mitotic nuclear division	undefined	7	0.1
GO:0045839	negative regulation of mitotic nuclear division	undefined	7	0.1
GO:1905819	negative regulation of chromosome separation	undefined	7	0.1
GO:1901988	negative regulation of cell cycle phase transition	undefined	7	0.1
GO:1901988	negative regulation of cell cycle phase transition	undefined	7	0.1
GO:0045839	negative regulation of mitotic nuclear division	undefined	7	0.1
GO:1905819	negative regulation of chromosome separation	undefined	7	0.1
GO:0033046	negative regulation of sister chromatid segregation	undefined	7	0.1
GO:1902100	negative regulation of metaphase/anaphase transition of cell cycle	undefined	7	0.1
GO:1901988	negative regulation of cell cycle phase transition	undefined	7	0.1
GO:1901991	negative regulation of mitotic cell cycle phase transition	undefined	7	0.1
GO:1901988	negative regulation of cell cycle phase transition	undefined	7	0.1
GO:1902100	negative regulation of metaphase/anaphase transition of cell cycle	undefined	7	0.1
GO:1901988	negative regulation of cell cycle phase transition	undefined	7	0.1
GO:1901991	negative regulation of mitotic cell cycle phase transition	undefined	7	0.1
GO:1902100	negative regulation of metaphase/anaphase transition of cell cycle	undefined	7	0.1
GO:0045839	negative regulation of mitotic nuclear division	undefined	7	0.1
GO:0033048	negative regulation of mitotic sister chromatid segregation	undefined	7	0.1
GO:1905819	negative regulation of chromosome separation	undefined	7	0.1
GO:2000816	negative regulation of mitotic sister chromatid separation	undefined	7	0.1
GO:0033046	negative regulation of sister chromatid segregation	undefined	7	0.1
GO:0033048	negative regulation of mitotic sister chromatid segregation	undefined	7	0.1
GO:0031023	microtubule organizing center organization	undefined	7	0.1
GO:0031023	microtubule organizing center organization	undefined	7	0.1
GO:0031577	spindle checkpoint	undefined	7	0.1
GO:1901988	negative regulation of cell cycle phase transition	undefined	7	0.1
GO:0045839	negative regulation of mitotic nuclear division	undefined	7	0.1
GO:1905819	negative regulation of chromosome separation	undefined	7	0.1
GO:0033046	negative regulation of sister chromatid segregation	undefined	7	0.1
GO:1901991	negative regulation of mitotic cell cycle phase transition	undefined	7	0.1
GO:0045839	negative regulation of mitotic nuclear division	undefined	7	0.1
GO:0051985	negative regulation of chromosome segregation	undefined	7	0.1
GO:0033046	negative regulation of sister chromatid segregation	undefined	7	0.1
GO:0033048	negative regulation of mitotic sister chromatid segregation	undefined	7	0.1
GO:1905819	negative regulation of chromosome separation	undefined	7	0.1
GO:0071174	mitotic spindle checkpoint	undefined	7	0.1
GO:0007094	mitotic spindle assembly checkpoint	undefined	7	0.1
GO:0031577	spindle checkpoint	undefined	7	0.1
GO:0071174	mitotic spindle checkpoint	undefined	7	0.1
GO:0071173	spindle assembly checkpoint	undefined	7	0.1
GO:0007094	mitotic spindle assembly checkpoint	undefined	7	0.1
GO:0007166	cell surface receptor signaling pathway	undefined	7	0.1
GO:0007166	cell surface receptor signaling pathway	undefined	7	0.1
GO:0033046	negative regulation of sister chromatid segregation	undefined	7	0.1
GO:0051985	negative regulation of chromosome segregation	undefined	7	0.1
GO:1905819	negative regulation of chromosome separation	undefined	7	0.1
GO:1905819	negative regulation of chromosome separation	undefined	7	0.1
GO:1905819	negative regulation of chromosome separation	undefined	7	0.1
GO:0051985	negative regulation of chromosome segregation	undefined	7	0.1
GO:0006605	protein targeting	undefined	7	0.1
GO:0032879	regulation of localization	undefined	7	0.1
GO:0051985	negative regulation of chromosome segregation	undefined	7	0.1
GO:0007166	cell surface receptor signaling pathway	undefined	7	0.1
GO:0051985	negative regulation of chromosome segregation	undefined	7	0.1
GO:0051985	negative regulation of chromosome segregation	undefined	7	0.1
GO:0032879	regulation of localization	undefined	7	0.1
GO:0031023	microtubule organizing center organization	undefined	7	0.1
GO:2001251	negative regulation of chromosome organization	undefined	7	0.1
GO:0051784	negative regulation of nuclear division	undefined	7	0.1
GO:0051985	negative regulation of chromosome segregation	undefined	7	0.1
GO:0033046	negative regulation of sister chromatid segregation	undefined	7	0.1
GO:1905819	negative regulation of chromosome separation	undefined	7	0.1
GO:0007166	cell surface receptor signaling pathway	undefined	7	0.1
GO:1905819	negative regulation of chromosome separation	undefined	7	0.1
GO:0033046	negative regulation of sister chromatid segregation	undefined	7	0.1
GO:0051985	negative regulation of chromosome segregation	undefined	7	0.1
GO:1905819	negative regulation of chromosome separation	undefined	7	0.1
GO:0051985	negative regulation of chromosome segregation	undefined	7	0.1
GO:0033046	negative regulation of sister chromatid segregation	undefined	7	0.1
GO:1905819	negative regulation of chromosome separation	undefined	7	0.1
GO:0032879	regulation of localization	undefined	7	0.1
GO:0031577	spindle checkpoint	undefined	7	0.1
GO:1901988	negative regulation of cell cycle phase transition	undefined	7	0.1
GO:0045839	negative regulation of mitotic nuclear division	undefined	7	0.1
GO:1905819	negative regulation of chromosome separation	undefined	7	0.1
GO:0033046	negative regulation of sister chromatid segregation	undefined	7	0.1
GO:1901991	negative regulation of mitotic cell cycle phase transition	undefined	7	0.1
GO:0045839	negative regulation of mitotic nuclear division	undefined	7	0.1
GO:0051985	negative regulation of chromosome segregation	undefined	7	0.1
GO:0033046	negative regulation of sister chromatid segregation	undefined	7	0.1
GO:0033048	negative regulation of mitotic sister chromatid segregation	undefined	7	0.1
GO:1905819	negative regulation of chromosome separation	undefined	7	0.1
GO:0019068	virion assembly	undefined	7	0.1
GO:0007166	cell surface receptor signaling pathway	undefined	7	0.1
GO:0019866	organelle inner membrane	undefined	6	0.1
GO:0019866	organelle inner membrane	undefined	6	0.1
GO:0005743	mitochondrial inner membrane	undefined	6	0.1
GO:0019866	organelle inner membrane	undefined	6	0.1
GO:0005743	mitochondrial inner membrane	undefined	6	0.1
GO:0019866	organelle inner membrane	undefined	6	0.1
GO:0019866	organelle inner membrane	undefined	6	0.1
GO:1902494	catalytic complex	undefined	6	0.1
GO:0019866	organelle inner membrane	undefined	6	0.1
GO:0019866	organelle inner membrane	undefined	6	0.1
GO:0005743	mitochondrial inner membrane	undefined	6	0.1
GO:0019866	organelle inner membrane	undefined	6	0.1
GO:0005743	mitochondrial inner membrane	undefined	6	0.1
GO:0005743	mitochondrial inner membrane	undefined	6	0.1
GO:0019866	organelle inner membrane	undefined	6	0.1
GO:0005743	mitochondrial inner membrane	undefined	6	0.1
GO:0019866	organelle inner membrane	undefined	6	0.1
GO:0005743	mitochondrial inner membrane	undefined	6	0.1
GO:0019866	organelle inner membrane	undefined	6	0.1
GO:0005743	mitochondrial inner membrane	undefined	6	0.1
GO:0005743	mitochondrial inner membrane	undefined	6	0.1
GO:0019866	organelle inner membrane	undefined	6	0.1
GO:0005743	mitochondrial inner membrane	undefined	6	0.1
GO:0004129	cytochrome-c oxidase activity	undefined	6	0.1
GO:0004129	cytochrome-c oxidase activity	undefined	6	0.1
GO:0016675	oxidoreductase activity, acting on a heme group of donors	undefined	6	0.1
GO:0016676	oxidoreductase activity, acting on a heme group of donors, oxygen as acceptor	undefined	6	0.1
GO:0004129	cytochrome-c oxidase activity	undefined	6	0.1
GO:0070566	adenylyltransferase activity	undefined	6	0.1
GO:0016744	transferase activity, transferring aldehyde or ketonic groups	undefined	6	0.1
GO:0008661	1-deoxy-D-xylulose-5-phosphate synthase activity	undefined	6	0.1
GO:0004549	tRNA-specific ribonuclease activity	undefined	6	0.1
GO:0004549	tRNA-specific ribonuclease activity	undefined	6	0.1
GO:0004359	glutaminase activity	undefined	6	0.1
GO:0004014	adenosylmethionine decarboxylase activity	undefined	6	0.1
GO:0140103	catalytic activity, acting on a glycoprotein	undefined	6	0.1
GO:0003909	DNA ligase activity	undefined	6	0.1
GO:0003910	DNA ligase (ATP) activity	undefined	6	0.1
GO:0003909	DNA ligase activity	undefined	6	0.1
GO:0043565	sequence-specific DNA binding	undefined	6	0.1
GO:0000149	SNARE binding	undefined	6	0.1
GO:0019905	syntaxin binding	undefined	6	0.1
GO:0051087	chaperone binding	undefined	6	0.1
GO:0099516	ion antiporter activity	undefined	6	0.1
GO:0140104	molecular carrier activity	Molecular Function	6	0.1
GO:0140142	nucleocytoplasmic carrier activity	undefined	6	0.1
GO:0045735	nutrient reservoir activity	Molecular Function	6	0.1
GO:0007218	neuropeptide signaling pathway	undefined	6	0.1
GO:0045934	negative regulation of nucleobase-containing compound metabolic process	undefined	6	0.1
GO:0072522	purine-containing compound biosynthetic process	undefined	6	0.1
GO:0072522	purine-containing compound biosynthetic process	undefined	6	0.1
GO:0043604	amide biosynthetic process	undefined	6	0.1
GO:0072522	purine-containing compound biosynthetic process	undefined	6	0.1
GO:0072522	purine-containing compound biosynthetic process	undefined	6	0.1
GO:0043603	cellular amide metabolic process	undefined	6	0.1
GO:0043604	amide biosynthetic process	undefined	6	0.1
GO:0006518	peptide metabolic process	undefined	6	0.1
GO:0006270	DNA replication initiation	undefined	6	0.1
GO:0006412	translation	undefined	6	0.1
GO:0006412	translation	undefined	6	0.1
GO:0045934	negative regulation of nucleobase-containing compound metabolic process	undefined	6	0.1
GO:0072522	purine-containing compound biosynthetic process	undefined	6	0.1
GO:0072522	purine-containing compound biosynthetic process	undefined	6	0.1
GO:0045934	negative regulation of nucleobase-containing compound metabolic process	undefined	6	0.1
GO:0031324	negative regulation of cellular metabolic process	undefined	6	0.1
GO:0045934	negative regulation of nucleobase-containing compound metabolic process	undefined	6	0.1
GO:0043604	amide biosynthetic process	undefined	6	0.1
GO:0072522	purine-containing compound biosynthetic process	undefined	6	0.1
GO:0072522	purine-containing compound biosynthetic process	undefined	6	0.1
GO:0072522	purine-containing compound biosynthetic process	undefined	6	0.1
GO:0006412	translation	undefined	6	0.1
GO:0031324	negative regulation of cellular metabolic process	undefined	6	0.1
GO:0045934	negative regulation of nucleobase-containing compound metabolic process	undefined	6	0.1
GO:0043604	amide biosynthetic process	undefined	6	0.1
GO:0072522	purine-containing compound biosynthetic process	undefined	6	0.1
GO:0072522	purine-containing compound biosynthetic process	undefined	6	0.1
GO:0043603	cellular amide metabolic process	undefined	6	0.1
GO:0043604	amide biosynthetic process	undefined	6	0.1
GO:0006518	peptide metabolic process	undefined	6	0.1
GO:0051172	negative regulation of nitrogen compound metabolic process	undefined	6	0.1
GO:0051172	negative regulation of nitrogen compound metabolic process	undefined	6	0.1
GO:0043043	peptide biosynthetic process	undefined	6	0.1
GO:0072522	purine-containing compound biosynthetic process	undefined	6	0.1
GO:0072522	purine-containing compound biosynthetic process	undefined	6	0.1
GO:0006518	peptide metabolic process	undefined	6	0.1
GO:0043043	peptide biosynthetic process	undefined	6	0.1
GO:0051253	negative regulation of RNA metabolic process	undefined	6	0.1
GO:0006412	translation	undefined	6	0.1
GO:0045934	negative regulation of nucleobase-containing compound metabolic process	undefined	6	0.1
GO:0072522	purine-containing compound biosynthetic process	undefined	6	0.1
GO:0072522	purine-containing compound biosynthetic process	undefined	6	0.1
GO:1901293	nucleoside phosphate biosynthetic process	undefined	6	0.1
GO:0046390	ribose phosphate biosynthetic process	undefined	6	0.1
GO:1901293	nucleoside phosphate biosynthetic process	undefined	6	0.1
GO:0046390	ribose phosphate biosynthetic process	undefined	6	0.1
GO:0043043	peptide biosynthetic process	undefined	6	0.1
GO:0072522	purine-containing compound biosynthetic process	undefined	6	0.1
GO:0046390	ribose phosphate biosynthetic process	undefined	6	0.1
GO:0046390	ribose phosphate biosynthetic process	undefined	6	0.1
GO:1901293	nucleoside phosphate biosynthetic process	undefined	6	0.1
GO:0046390	ribose phosphate biosynthetic process	undefined	6	0.1
GO:0046390	ribose phosphate biosynthetic process	undefined	6	0.1
GO:0043043	peptide biosynthetic process	undefined	6	0.1
GO:0072522	purine-containing compound biosynthetic process	undefined	6	0.1
GO:0072522	purine-containing compound biosynthetic process	undefined	6	0.1
GO:0006518	peptide metabolic process	undefined	6	0.1
GO:0043043	peptide biosynthetic process	undefined	6	0.1
GO:0045934	negative regulation of nucleobase-containing compound metabolic process	undefined	6	0.1
GO:1901293	nucleoside phosphate biosynthetic process	undefined	6	0.1
GO:0045934	negative regulation of nucleobase-containing compound metabolic process	undefined	6	0.1
GO:0045934	negative regulation of nucleobase-containing compound metabolic process	undefined	6	0.1
GO:0016485	protein processing	undefined	6	0.1
GO:0016485	protein processing	undefined	6	0.1
GO:0045934	negative regulation of nucleobase-containing compound metabolic process	undefined	6	0.1
GO:0051172	negative regulation of nitrogen compound metabolic process	undefined	6	0.1
GO:0051253	negative regulation of RNA metabolic process	undefined	6	0.1
GO:0051253	negative regulation of RNA metabolic process	undefined	6	0.1
GO:0031324	negative regulation of cellular metabolic process	undefined	6	0.1
GO:0045934	negative regulation of nucleobase-containing compound metabolic process	undefined	6	0.1
GO:0031324	negative regulation of cellular metabolic process	undefined	6	0.1
GO:0051172	negative regulation of nitrogen compound metabolic process	undefined	6	0.1
GO:0045934	negative regulation of nucleobase-containing compound metabolic process	undefined	6	0.1
GO:0031324	negative regulation of cellular metabolic process	undefined	6	0.1
GO:0051172	negative regulation of nitrogen compound metabolic process	undefined	6	0.1
GO:0045934	negative regulation of nucleobase-containing compound metabolic process	undefined	6	0.1
GO:0072522	purine-containing compound biosynthetic process	undefined	6	0.1
GO:0072522	purine-containing compound biosynthetic process	undefined	6	0.1
GO:0006412	translation	undefined	6	0.1
GO:0072522	purine-containing compound biosynthetic process	undefined	6	0.1
GO:0043043	peptide biosynthetic process	undefined	6	0.1
GO:0072522	purine-containing compound biosynthetic process	undefined	6	0.1
GO:0046390	ribose phosphate biosynthetic process	undefined	6	0.1
GO:0046390	ribose phosphate biosynthetic process	undefined	6	0.1
GO:1901293	nucleoside phosphate biosynthetic process	undefined	6	0.1
GO:1901293	nucleoside phosphate biosynthetic process	undefined	6	0.1
GO:0006270	DNA replication initiation	undefined	6	0.1
GO:0006412	translation	undefined	6	0.1
GO:0006412	translation	undefined	6	0.1
GO:0045934	negative regulation of nucleobase-containing compound metabolic process	undefined	6	0.1
GO:0072522	purine-containing compound biosynthetic process	undefined	6	0.1
GO:0072522	purine-containing compound biosynthetic process	undefined	6	0.1
GO:0045934	negative regulation of nucleobase-containing compound metabolic process	undefined	6	0.1
GO:0031324	negative regulation of cellular metabolic process	undefined	6	0.1
GO:0045934	negative regulation of nucleobase-containing compound metabolic process	undefined	6	0.1
GO:0043604	amide biosynthetic process	undefined	6	0.1
GO:0072522	purine-containing compound biosynthetic process	undefined	6	0.1
[truncated: 2,271 more rows]

## Sheet: pathways_ALL
Biochemical pathways	Number of proteins including isoformes
Metabolic pathways	418
Biosynthesis of secondary metabolites	182
Biosynthesis of antibiotics	154
Microbial metabolism in diverse environments	113
Carbon metabolism	80
Biosynthesis of amino acids	76
Ribosome	74
Thermogenesis	68
Purine metabolism	44
Oxytocin signaling pathway	43
Oxidative phosphorylation	37
Ribosome biogenesis in eukaryotes	37
Endocytosis	37
Glucagon signaling pathway	36
Proteasome	35
cGMP-PKG signaling pathway	34
Insulin signaling pathway	33
Protein processing in endoplasmic reticulum	33
Ubiquitin mediated proteolysis	31
RNA transport	31
Glycine, serine and threonine metabolism	30
Phagosome	29
PI3K-Akt signaling pathway	29
AMPK signaling pathway	29
Apelin signaling pathway	29
Circadian entrainment	29
Valine, leucine and isoleucine degradation	28
mTOR signaling pathway	27
Spliceosome	27
Lysosome	27
Cysteine and methionine metabolism	27
Glycolysis / Gluconeogenesis	27
Wnt signaling pathway	26
Calcium signaling pathway	26
Amino sugar and nucleotide sugar metabolism	26
Cellular senescence	26
Vascular smooth muscle contraction	26
Aminoacyl-tRNA biosynthesis	26
Retrograde endocannabinoid signaling	25
cAMP signaling pathway	25
Sphingolipid signaling pathway	25
Dopaminergic synapse	25
Cell cycle - yeast	25
Olfactory transduction	25
Platelet activation	25
Tight junction	24
Alanine, aspartate and glutamate metabolism	24
Adrenergic signaling in cardiomyocytes	23
Gap junction	23
Neurotrophin signaling pathway	22
Aldosterone synthesis and secretion	22
Salivary secretion	22
Autophagy - animal	21
Citrate cycle (TCA cycle)	21
Ras signaling pathway	21
Fatty acid metabolism	21
Autophagy - yeast	21
Peroxisome	21
Regulation of lipolysis in adipocytes	21
Meiosis - yeast	20
Rap1 signaling pathway	19
Regulation of actin cytoskeleton	19
Fluid shear stress and atherosclerosis	19
Insulin resistance	19
Long-term potentiation	19
Pentose phosphate pathway	19
Long-term depression	19
Arginine biosynthesis	19
Pyruvate metabolism	19
Pyrimidine metabolism	18
GABAergic synapse	18
PPAR signaling pathway	18
Axon regeneration	17
Cell cycle	17
HIF-1 signaling pathway	17
RNA degradation	17
Synaptic vesicle cycle	17
One carbon pool by folate	16
RNA polymerase	16
MAPK signaling pathway - yeast	16
Glutamatergic synapse	16
Glycerophospholipid metabolism	16
FoxO signaling pathway	16
Fatty acid degradation	16
Hippo signaling pathway	16
Drug metabolism - other enzymes	16
MAPK signaling pathway	15
Focal adhesion	15
mRNA surveillance pathway	15
SNARE interactions in vesicular transport	15
Glutathione metabolism	15
Renin secretion	15
Propanoate metabolism	15
Arginine and proline metabolism	15
Carbon fixation in photosynthetic organisms	15
Glyoxylate and dicarboxylate metabolism	14
Chemokine signaling pathway	14
Axon guidance	14
Fc gamma R-mediated phagocytosis	14
Longevity regulating pathway	14
Apoptosis	14
Influenza A	14
2-Oxocarboxylic acid metabolism	14
Lysine degradation	14
Longevity regulating pathway - multiple species	13
Phosphatidylinositol signaling system	13
Estrogen signaling pathway	13
Melanogenesis	13
Hippo signaling pathway - fly	13
MAPK signaling pathway - fly	12
VEGF signaling pathway	12
Osteoclast differentiation	12
Amyotrophic lateral sclerosis (ALS)	12
Thyroid hormone signaling pathway	12
Cholinergic synapse	12
Inositol phosphate metabolism	12
Inflammatory mediator regulation of TRP channels	12
Gastric acid secretion	12
Butanoate metabolism	12
Progesterone-mediated oocyte maturation	12
Histidine metabolism	12
Protein export	12
Systemic lupus erythematosus	12
Carbon fixation pathways in prokaryotes	11
Adherens junction	11
Sphingolipid metabolism	11
Porphyrin and chlorophyll metabolism	11
C-type lectin receptor signaling pathway	11
Phototransduction - fly	11
Pertussis	11
Legionellosis	11
Rheumatoid arthritis	11
Methane metabolism	11
Circadian rhythm	11
Adipocytokine signaling pathway	11
Notch signaling pathway	10
Folate biosynthesis	10
Leukocyte transendothelial migration	10
Antifolate resistance	10
Serotonergic synapse	10
Relaxin signaling pathway	10
Terpenoid backbone biosynthesis	10
Fatty acid elongation	10
Fructose and mannose metabolism	10
Selenocompound metabolism	10
Nitrogen metabolism	10
Tryptophan metabolism	10
Galactose metabolism	10
Steroid biosynthesis	10
Vasopressin-regulated water reabsorption	9
Apoptosis - fly	9
Phototransduction	9
GnRH signaling pathway	9
Toxoplasmosis	9
Collecting duct acid secretion	9
Hypertrophic cardiomyopathy (HCM)	9
Pentose and glucuronate interconversions	9
beta-Alanine metabolism	8
Pantothenate and CoA biosynthesis	8
Fc epsilon RI signaling pathway	8
Nucleotide excision repair	8
Ascorbate and aldarate metabolism	8
Longevity regulating pathway - worm	8
Mitophagy - yeast	8
Parathyroid hormone synthesis, secretion and action	8
Tyrosine metabolism	8
Ether lipid metabolism	8
Hippo signaling pathway - multiple species	8
Sulfur metabolism	8
Pancreatic secretion	7
NOD-like receptor signaling pathway	7
Basal transcription factors	7
Phenylalanine metabolism	7
Phenylalanine, tyrosine and tryptophan biosynthesis	7
ABC transporters	7
Cyanoamino acid metabolism	7
Nicotinate and nicotinamide metabolism	7
Measles	7
Two-component system	7
Antigen processing and presentation	7
Starch and sucrose metabolism	7
Amoebiasis	7
Toll-like receptor signaling pathway	6
AGE-RAGE signaling pathway in diabetic complications	6
DNA replication	6
Mitophagy - animal	6
Platinum drug resistance	6
Phospholipase D signaling pathway	6
Synthesis and degradation of ketone bodies	6
Cardiac muscle contraction	6
Quorum sensing	6
Hedgehog signaling pathway - fly	6
Protein digestion and absorption	6
Bile secretion	6
Drug metabolism - cytochrome P450	6
Cytosolic DNA-sensing pathway	5
Mismatch repair	5
Biosynthesis of unsaturated fatty acids	5
Retinol metabolism	5
Homologous recombination	5
Fanconi anemia pathway	5
Autophagy - other	5
Thiamine metabolism	5
EGFR tyrosine kinase inhibitor resistance	5
TGF-beta signaling pathway	5
Th1 and Th2 cell differentiation	5
Th17 cell differentiation	5
Lysine biosynthesis	5
NF-kappa B signaling pathway	5
Streptomycin biosynthesis	5
p53 signaling pathway	5
Metabolism of xenobiotics by cytochrome P450	5
Chemical carcinogenesis	5
Valine, leucine and isoleucine biosynthesis	5
Fatty acid biosynthesis	4
Riboflavin metabolism	4
Endocrine resistance	4
Aldosterone-regulated sodium reabsorption	4
Glycerolipid metabolism	4
Tropane, piperidine and pyridine alkaloid biosynthesis	4
Base excision repair	4
Vitamin B6 metabolism	4
Caprolactam degradation	4
Glycosylphosphatidylinositol (GPI)-anchor biosynthesis	4
Endocrine and other factor-regulated calcium reabsorption	4
Various types of N-glycan biosynthesis	4
Hedgehog signaling pathway	4
Dilated cardiomyopathy (DCM)	4
Aminobenzoate degradation	4
Proximal tubule bicarbonate reclamation	4
Monobactam biosynthesis	4
Chronic myeloid leukemia	3
Lipopolysaccharide biosynthesis	3
N-Glycan biosynthesis	3
Geraniol degradation	3
Ubiquinone and other terpenoid-quinone biosynthesis	3
Isoquinoline alkaloid biosynthesis	3
Cholesterol metabolism	3
Phosphonate and phosphinate metabolism	3
Toll and Imd signaling pathway	3
Renin-angiotensin system	3
Vitamin digestion and absorption	3
Insulin secretion	3
Thyroid hormone synthesis	3
D-Glutamine and D-glutamate metabolism	3
Carbapenem biosynthesis	3
Biotin metabolism	2
IL-17 signaling pathway	2
Melanoma	2
Novobiocin biosynthesis	2
Taurine and hypotaurine metabolism	2
Non-homologous end-joining	2
Apoptosis - multiple species	2
Glycosaminoglycan degradation	2
Benzoate degradation	2
Mineral absorption	2
Taste transduction	2
Ovarian steroidogenesis	2
Cortisol synthesis and secretion	2
Phenylpropanoid biosynthesis	2
Bacterial secretion system	2
Arrhythmogenic right ventricular cardiomyopathy (ARVC)	2
Arachidonic acid metabolism	2
Carbohydrate digestion and absorption	2
Other types of O-glycan biosynthesis	2
ErbB signaling pathway	1
Dorso-ventral axis formation	1
Signaling pathways regulating pluripotency of stem cells	1
TNF signaling pathway	1
Prolactin signaling pathway	1
GnRH secretion	1
Acute myeloid leukemia	1
Fat digestion and absorption	1
Glycosaminoglycan biosynthesis - chondroitin sulfate / dermatan sulfate	1
Type I diabetes mellitus	1
Cutin, suberine and wax biosynthesis	1
African trypanosomiasis	1
Cell cycle - Caulobacter	1
Sulfur relay system	1
Neomycin, kanamycin and gentamicin biosynthesis	1
Fluorobenzoate degradation	1
Styrene degradation	1
alpha-Linolenic acid metabolism	1
Sesquiterpenoid and triterpenoid biosynthesis	1
Steroid hormone biosynthesis	1
Primary bile acid biosynthesis	1
Huntington disease	46
Alzheimer disease	44
Human immunodeficiency virus 1 infection	39
Pathways in cancer	39
Alcoholism	37
Parkinson disease	36
Human papillomavirus infection	36
Oocyte meiosis	32
Non-alcoholic fatty liver disease (NAFLD)	31
Human cytomegalovirus infection	28
Epstein-Barr virus infection	26
Viral carcinogenesis	26
Tuberculosis	23
Human T-cell leukemia virus 1 infection	22
Kaposi sarcoma-associated herpesvirus infection	22
Vibrio cholerae infection	19
Glioma	18
Proteoglycans in cancer	18
Amphetamine addiction	18
Necroptosis	16
Epithelial cell signaling in Helicobacter pylori infection	16
Central carbon metabolism in cancer	15
Salmonella infection	14
Shigellosis	13
MAPK signaling pathway - plant	12
Bacterial invasion of epithelial cells	12
Renal cell carcinoma	12
Choline metabolism in cancer	12
Herpes simplex virus 1 infection	12
Morphine addiction	11
Natural killer cell mediated cytotoxicity	10
B cell receptor signaling pathway	10
Cushing syndrome	10
Pathogenic Escherichia coli infection	10
Transcriptional misregulation in cancer	9
MicroRNAs in cancer	9
PD-L1 expression and PD-1 checkpoint pathway in cancer	9
Yersinia infection	8
Pancreatic cancer	8
Prion diseases	8
Viral myocarditis	8
Chagas disease (American trypanosomiasis)	8
Colorectal cancer	7
T cell receptor signaling pathway	7
Hepatitis C	7
Hepatocellular carcinoma	7
Plant-pathogen interaction	7
Ferroptosis	6
Type II diabetes mellitus	5
Hepatitis B	5
Prostate cancer	5
Small cell lung cancer	5
Cocaine addiction	5
Endometrial cancer	4
Circadian rhythm - plant	3
Non-small cell lung cancer	3
Gastric cancer	3
Plant hormone signal transduction	2
Breast cancer	2
Nicotine addiction	2
Leishmaniasis	1
Thyroid cancer	1
Bladder cancer	1

## Sheet: Fatty acid
Gene name	Gene ID Hondaea fermentalgiana	Gene ID T. aureum ssp. strugatskii	Gene Hondaea fermentalgiana
Acyl CoA dehydrogenase family member 11	gi_1377601090	TRINITY_DN2888_c0_g1::TRINITY_DN2888_c0_g1_i1::g.3460::m.3460	dbj_GBG31443
Cardiolipin synthase CMP forming	gi_1377606493	TRINITY_DN6615_c0_g1::TRINITY_DN6615_c0_g1_i1::g.8848::m.8848	dbj_GBG26027
Phosphatidate phosphatase LPIN3	gi_1377608150	TRINITY_DN7751_c0_g1::TRINITY_DN7751_c0_g1_i1::g.10730::m.10730	dbj_GBG24223
Enoyl CoA delta isomerase 3	gi_1377602283	TRINITY_DN7918_c0_g1::TRINITY_DN7918_c0_g1_i1::g.11001::m.11001	dbj_GBG30322
Hypothetical Protein FCC1311 005815	gi_1377599574	TRINITY_DN8200_c0_g1::TRINITY_DN8200_c0_g1_i1::g.11381::m.11381	dbj_GBG32998
Non specific lipid transfer protein	gi_1377599435	TRINITY_DN8246_c0_g1::TRINITY_DN8246_c0_g1_i1::g.11391::m.11391	dbj_GBG33130
Phosphatidylglycerophosphatase GEP4 mitochondrial	gi_1377607250	TRINITY_DN8226_c0_g1::TRINITY_DN8226_c0_g1_i1::g.11507::m.11507	dbj_GBG25394
Phosphatidylserine decarboxylase proenzyme 2	gi_1377599718	TRINITY_DN8303_c0_g1::TRINITY_DN8303_c0_g1_i1::g.11569::m.11569	dbj_GBG32861
Peroxisomal acyl coenzyme A oxidase 1	gi_1377600675	TRINITY_DN9273_c0_g1::TRINITY_DN9273_c0_g1_i1::g.13169::m.13169	dbj_GBG31886
3 hydroxyisobutyryl CoA hydrolase mitochondrial	gi_1377607473	TRINITY_DN9452_c0_g1::TRINITY_DN9452_c0_g1_i1::g.13621::m.13621	dbj_GBG25122
Lysophospholipid acyltransferase LPEAT2	gi_1377606550	TRINITY_DN9552_c0_g1::TRINITY_DN9552_c0_g1_i1::g.13921::m.13921	dbj_GBG25939
Lipase member K	gi_1377597959	TRINITY_DN9827_c0_g1::TRINITY_DN9827_c0_g1_i1::g.14549::m.14549	dbj_GBG34595
Acetyl CoA acetyltransferase mitochondrial	gi_1377608155	TRINITY_DN9951_c0_g1::TRINITY_DN9951_c0_g1_i1::g.14792::m.14792	dbj_GBG24228
Enoyl CoA delta isomerase 2 mitochondrial	gi_1377602556	TRINITY_DN10806_c0_g1::TRINITY_DN10806_c0_g1_i1::g.16824::m.16824	dbj_GBG30011
Hypothetical Protein FCC1311 083361	gi_1377603067	TRINITY_DN11303_c0_g1::TRINITY_DN11303_c0_g1_i1::g.18098::m.18098	dbj_GBG29531
Phospholipase ABHD3	gi_1377604023	TRINITY_DN11361_c0_g1::TRINITY_DN11361_c0_g1_i1::g.18353::m.18353	dbj_GBG28494
Leucine rich repeat serine/threonine protein kinase 2	gi_1377607405	TRINITY_DN12340_c0_g1::TRINITY_DN12340_c0_g1_i1::g.21031::m.21031	dbj_GBG25054
1 acyl sn glycerol 3 phosphate acyltransferase	gi_1377606312	TRINITY_DN13168_c0_g1::TRINITY_DN13168_c0_g1_i1::g.23417::m.23417	dbj_GBG26176
Lipase member N	gi_1377597870	TRINITY_DN13202_c0_g1::TRINITY_DN13202_c0_g1_i1::g.23593::m.23593	dbj_GBG34670
Polyketide synthase	gi_1377600016	TRINITY_DN13560_c0_g1::TRINITY_DN13560_c0_g1_i1::g.24394::m.24394	dbj_GBG32548
Carnitine O palmitoyltransferase 2 mitochondrial	gi_1377606666	TRINITY_DN13789_c0_g1::TRINITY_DN13789_c0_g1_i1::g.25268::m.25268	dbj_GBG25864
Choline/ethanolamine kinase	gi_1377600317	TRINITY_DN14290_c0_g1::TRINITY_DN14290_c0_g1_i1::g.26797::m.26797	dbj_GBG32215
Hypothetical Protein FCC1311 007801	gi_1377601429	TRINITY_DN14234_c0_g1::TRINITY_DN14234_c0_g1_i1::g.26856::m.26856	dbj_GBG31124
Lipase putative	gi_1377607974	TRINITY_DN14312_c0_g1::TRINITY_DN14312_c0_g1_i2::g.27060::m.27060	dbj_GBG24482
Hypothetical Protein FCC1311 076992	gi_1377601022	TRINITY_DN14428_c0_g1::TRINITY_DN14428_c0_g1_i1::g.27424::m.27424	dbj_GBG31475
Coiled coil helix coiled coil helix domain containing protein 1	gi_1377606213	TRINITY_DN14482_c0_g1::TRINITY_DN14482_c0_g1_i2::g.27616::m.27616	dbj_GBG26077
Sn1 specific diacylglycerol lipase alpha partial	gi_1377602209	TRINITY_DN14484_c0_g1::TRINITY_DN14484_c0_g1_i1::g.27645::m.27645	dbj_GBG30248
Phospholipase A1 Igamma2 chloroplastic	gi_1377604341	TRINITY_DN14526_c0_g1::TRINITY_DN14526_c0_g1_i1::g.27807::m.27807	dbj_GBG28357
Hypothetical Protein FCC1311 039011	gi_1377607694	TRINITY_DN14557_c0_g1::TRINITY_DN14557_c0_g1_i1::g.27822::m.27822	dbj_GBG24950
Diacylglycerol O acyltransferase 2	gi_1377601492	TRINITY_DN14817_c0_g1::TRINITY_DN14817_c0_g1_i1::g.28781::m.28781	dbj_GBG31037
L amino acid oxidase	gi_1377603072	TRINITY_DN15208_c0_g1::TRINITY_DN15208_c0_g1_i1::g.30270::m.30270	dbj_GBG29536
3 hydroxyacyl CoA dehydrogenase type 2	gi_1377598296	TRINITY_DN15471_c0_g1::TRINITY_DN15471_c0_g1_i1::g.30971::m.30971	dbj_GBG34250
Acyl CoA dehydrogenase family member 11	gi_1377608091	TRINITY_DN15662_c0_g1::TRINITY_DN15662_c0_g1_i1::g.31690::m.31690	dbj_GBG24599
7 dehydrocholesterol reductase	gi_1377601944	TRINITY_DN15823_c0_g1::TRINITY_DN15823_c0_g1_i3::g.32481::m.32481	dbj_GBG30628
Peroxisomal 2 4 dienoyl CoA reductase	gi_1377604315	TRINITY_DN15902_c0_g1::TRINITY_DN15902_c0_g1_i1::g.32775::m.32775	dbj_GBG28331
Elongation of very long chain fatty acids protein 6	gi_1377604727	TRINITY_DN15998_c0_g2::TRINITY_DN15998_c0_g2_i1::g.32831::m.32831	dbj_GBG27854
ABC efflux transporter ATP binding protein	gi_1377604745	TRINITY_DN16086_c0_g1::TRINITY_DN16086_c0_g1_i1::g.33305::m.33305	dbj_GBG27872
Diacylglycerol kinase	gi_1377602412	TRINITY_DN16095_c0_g1::TRINITY_DN16095_c0_g1_i2::g.33364::m.33364	dbj_GBG30126
Enoyl CoA hydratase mitochondrial	gi_1377600940	TRINITY_DN16199_c0_g1::TRINITY_DN16199_c0_g1_i1::g.33642::m.33642	dbj_GBG31613
3 hydroxy 3 methylglutaryl coenzyme A reductase 3	gi_1377601241	TRINITY_DN16162_c0_g1::TRINITY_DN16162_c0_g1_i1::g.33692::m.33692	dbj_GBG31329
Lipase	gi_1377602085	TRINITY_DN16127_c0_g1::TRINITY_DN16127_c0_g1_i1::g.33816::m.33816	dbj_GBG30412
Hydroxyacyl coenzyme A dehydrogenase mitochondrial	gi_1377599412	TRINITY_DN16278_c0_g1::TRINITY_DN16278_c0_g1_i1::g.34220::m.34220	dbj_GBG33107
DNA directed RNA polymerase subunit	gi_1377598399	TRINITY_DN16262_c0_g1::TRINITY_DN16262_c0_g1_i1::g.34305::m.34305	dbj_GBG34121
Phosphatidylserine synthase 2	gi_1377607156	TRINITY_DN16494_c0_g1::TRINITY_DN16494_c0_g1_i1::g.35125::m.35125	dbj_GBG25300
3 hydroxybutyryl CoA dehydratase like protein mitochondrial	gi_1377604091	TRINITY_DN16500_c0_g1::TRINITY_DN16500_c0_g1_i1::g.35510::m.35510	dbj_GBG28455
Delta7 sterol 56 desaturase	gi_1377605468	TRINITY_DN16606_c0_g1::TRINITY_DN16606_c0_g1_i1::g.35656::m.35656	dbj_GBG27014
Cycloartenol synthase	gi_1377601242	TRINITY_DN16669_c0_g1::TRINITY_DN16669_c0_g1_i1::g.35737::m.35737	dbj_GBG31330
PA phosphatase related family protein DDB G0284367	gi_1377601984	TRINITY_DN16615_c1_g1::TRINITY_DN16615_c1_g1_i2::g.35992::m.35992	dbj_GBG30594
Cycloeucalenol cycloisomerase	gi_1377598665	TRINITY_DN16735_c0_g1::TRINITY_DN16735_c0_g1_i2::g.36406::m.36406	dbj_GBG33886
Elongation of very long chain fatty acids protein 4	gi_1377599831	TRINITY_DN16891_c0_g1::TRINITY_DN16891_c0_g1_i1::g.36535::m.36535	dbj_GBG32706
Lysophosphatidylcholine acyltransferase	gi_1377603532	TRINITY_DN16885_c0_g1::TRINITY_DN16885_c0_g1_i2::g.36704::m.36704	dbj_GBG29045
Lipase putative	gi_1377602578	TRINITY_DN16959_c0_g1::TRINITY_DN16959_c0_g1_i1::g.36919::m.36919	dbj_GBG29924
Delta24 sterol reductase	gi_1377605040	TRINITY_DN16928_c0_g1::TRINITY_DN16928_c0_g1_i1::g.36966::m.36966	dbj_GBG27560
Lysophospholipid acyltransferase LPEAT2	gi_1377606550	TRINITY_DN17040_c0_g1::TRINITY_DN17040_c0_g1_i2::g.37628::m.37628	dbj_GBG25939
Short chain specific acyl CoA dehydrogenase mitochondrial	gi_1377608441	TRINITY_DN17273_c0_g1::TRINITY_DN17273_c0_g1_i1::g.38237::m.38237	dbj_GBG24023
Sterol 24 C methyltransferase	gi_1377605118	TRINITY_DN17235_c0_g1::TRINITY_DN17235_c0_g1_i1::g.38434::m.38434	dbj_GBG27352
Acetyl CoA acetyltransferase mitochondrial	gi_1377607443	TRINITY_DN17309_c0_g1::TRINITY_DN17309_c0_g1_i1::g.38785::m.38785	dbj_GBG25092
Choline/ethanolamine kinase	gi_1377600695	TRINITY_DN17338_c0_g1::TRINITY_DN17338_c0_g1_i2::g.39072::m.39072	dbj_GBG31906
Methylsterol monooxygenase 1 1	gi_1377605845	TRINITY_DN17423_c0_g1::TRINITY_DN17423_c0_g1_i1::g.39388::m.39388	dbj_GBG26608
Glycerol 3 phosphate acyltransferase 3	gi_1377597823	TRINITY_DN17590_c0_g1::TRINITY_DN17590_c0_g1_i1::g.39806::m.39806	dbj_GBG34725
Long chain fatty acid CoA ligase 6	gi_1377607459	TRINITY_DN17671_c0_g1::TRINITY_DN17671_c0_g1_i2::g.40318::m.40318	dbj_GBG25108
Phosphatidylethanolamine N methyltransferase	gi_1377604625	TRINITY_DN17761_c0_g1::TRINITY_DN17761_c0_g1_i1::g.40778::m.40778	dbj_GBG27905
CDP diacylglycerol inositol 3 phosphatidyltransferase	gi_1377599916	TRINITY_DN18098_c0_g1::TRINITY_DN18098_c0_g1_i1::g.42042::m.42042	dbj_GBG32649
Monoglyceride lipase	gi_1377606625	TRINITY_DN18390_c0_g1::TRINITY_DN18390_c0_g1_i1::g.43484::m.43484	dbj_GBG25823
Monoglyceride lipase	gi_1377606625	TRINITY_DN18390_c0_g1::TRINITY_DN18390_c0_g1_i2::g.43488::m.43488	dbj_GBG25823
Methylglutaconyl CoA hydratase mitochondrial	gi_1377606100	TRINITY_DN18540_c0_g1::TRINITY_DN18540_c0_g1_i1::g.44584::m.44584	dbj_GBG26559
Delta12 fatty acid desaturase	gi_1377608391	TRINITY_DN18539_c0_g1::TRINITY_DN18539_c0_g1_i1::g.44647::m.44647	dbj_GBG24140
Lysophospholipid acyltransferase LPEAT2	gi_1377603076	TRINITY_DN18509_c0_g1::TRINITY_DN18509_c0_g1_i1::g.44662::m.44662	dbj_GBG29540
Sterol 14 demethylase partial	gi_1377604944	TRINITY_DN18523_c1_g1::TRINITY_DN18523_c1_g1_i1::g.44697::m.44697	dbj_GBG27609
Delta14 sterol reductase	gi_1377599548	TRINITY_DN18514_c0_g1::TRINITY_DN18514_c0_g1_i1::g.44939::m.44939	dbj_GBG32972
Monoacylglycerol lipase ABHD6	gi_1377607424	TRINITY_DN18654_c0_g1::TRINITY_DN18654_c0_g1_i3::g.45242::m.45242	dbj_GBG25073
Phospholipase D alpha 1	gi_1377598065	TRINITY_DN18661_c0_g1::TRINITY_DN18661_c0_g1_i1::g.45308::m.45308	dbj_GBG34460
Enoyl CoA hydratase mitochondrial	gi_1377602165	TRINITY_DN18891_c0_g1::TRINITY_DN18891_c0_g1_i1::g.46117::m.46117	dbj_GBG30357
Elongation of very long chain fatty acids protein 5	gi_1377607158	TRINITY_DN18841_c0_g1::TRINITY_DN18841_c0_g1_i1::g.46239::m.46239	dbj_GBG25302
Methylsterol monooxygenase 1	gi_1377601959	TRINITY_DN18998_c0_g1::TRINITY_DN18998_c0_g1_i1::g.46856::m.46856	dbj_GBG30569
Sn1 specific diacylglycerol lipase alpha	gi_1377604678	TRINITY_DN18907_c0_g1::TRINITY_DN18907_c0_g1_i1::g.47150::m.47150	dbj_GBG27805
3 beta hydroxysteroid dehydrogenase type 4	gi_1377608279	TRINITY_DN19087_c0_g1::TRINITY_DN19087_c0_g1_i1::g.47182::m.47182	dbj_GBG24352
Enoyl CoA delta isomerase 2 mitochondrial	gi_1377599876	TRINITY_DN19091_c0_g1::TRINITY_DN19091_c0_g1_i1::g.47263::m.47263	dbj_GBG32681
Choline phosphate cytidylyltransferase 1	gi_1377602274	TRINITY_DN19103_c0_g1::TRINITY_DN19103_c0_g1_i1::g.48214::m.48214	dbj_GBG30313
Monoglyceride lipase	gi_1377604062	TRINITY_DN19235_c0_g1::TRINITY_DN19235_c0_g1_i1::g.48318::m.48318	dbj_GBG28533
Mevalonate kinase	gi_1377598832	TRINITY_DN19228_c0_g1::TRINITY_DN19228_c0_g1_i1::g.48540::m.48540	dbj_GBG33701
Malonyl CoA acyl carrier protein transacylase	gi_1377608579	TRINITY_DN19327_c0_g2::TRINITY_DN19327_c0_g2_i1::g.49158::m.49158	dbj_GBG23800
Phospholipase D partial	gi_1377599945	TRINITY_DN19485_c0_g1::TRINITY_DN19485_c0_g1_i2::g.49836::m.49836	dbj_GBG32568
Ankyrin repeat domain containing protein 1	gi_1377599573	TRINITY_DN19412_c0_g1::TRINITY_DN19412_c0_g1_i1::g.49994::m.49994	dbj_GBG32997
1 acyl sn glycerol 3 phosphate acyltransferase	gi_1377606312	TRINITY_DN19616_c0_g1::TRINITY_DN19616_c0_g1_i4::g.51136::m.51136	dbj_GBG26176
3 hydroxyacyl CoA dehydrogenase type 2	gi_1377604401	TRINITY_DN19768_c0_g1::TRINITY_DN19768_c0_g1_i6::g.51896::m.51896	dbj_GBG28417
NADH cytochrome b5 reductase 2	gi_1377605460	TRINITY_DN19826_c0_g1::TRINITY_DN19826_c0_g1_i1::g.52235::m.52235	dbj_GBG27006
Long chain fatty acid CoA ligase 1	gi_1377604078	TRINITY_DN19807_c0_g1::TRINITY_DN19807_c0_g1_i2::g.52285::m.52285	dbj_GBG28442
Hypothetical Protein FCC1311 015292	gi_1377607168	TRINITY_DN19836_c1_g1::TRINITY_DN19836_c1_g1_i3::g.52661::m.52661	dbj_GBG25312
Fatty acid desaturase 3	gi_1377603398	TRINITY_DN20071_c0_g1::TRINITY_DN20071_c0_g1_i1::g.53409::m.53409	dbj_GBG29175
Lysophosphatidylcholine acyltransferase 2	gi_1377599874	TRINITY_DN20138_c0_g1::TRINITY_DN20138_c0_g1_i1::g.54300::m.54300	dbj_GBG32679
Diacylglycerol O acyltransferase 2	gi_1377601513	TRINITY_DN20296_c0_g1::TRINITY_DN20296_c0_g1_i1::g.54598::m.54598	dbj_GBG31058
Peroxisomal multifunctional enzyme type 2	gi_1377598555	TRINITY_DN20209_c0_g1::TRINITY_DN20209_c0_g1_i1::g.54723::m.54723	dbj_GBG33967
Lipase putative	gi_1377602498	TRINITY_DN20239_c0_g1::TRINITY_DN20239_c0_g1_i1::g.54880::m.54880	dbj_GBG30060
1 acyl sn glycerol 3 phosphate acyltransferase 3	gi_1377601127	TRINITY_DN20207_c0_g1::TRINITY_DN20207_c0_g1_i2::g.55040::m.55040	dbj_GBG31411
Non specific lipid transfer protein	gi_1377598173	TRINITY_DN20339_c0_g1::TRINITY_DN20339_c0_g1_i1::g.55517::m.55517	dbj_GBG34378
Glycerol 3 phosphate acyltransferase	gi_1377604375	TRINITY_DN20460_c0_g1::TRINITY_DN20460_c0_g1_i3::g.56467::m.56467	dbj_GBG28391
Carnitine O palmitoyltransferase 2 mitochondrial	gi_1377604787	TRINITY_DN20598_c0_g1::TRINITY_DN20598_c0_g1_i1::g.56773::m.56773	dbj_GBG27714
Hypothetical Protein FCC1311 025511	gi_1377603164	TRINITY_DN20506_c0_g2::TRINITY_DN20506_c0_g2_i3::g.56858::m.56858	dbj_GBG29309
Choline/ethanolaminephosphotransferase 1	gi_1377601255	TRINITY_DN20681_c0_g1::TRINITY_DN20681_c0_g1_i1::g.57402::m.57402	dbj_GBG31343
Ethanolaminephosphotransferase 1	gi_1377605035	TRINITY_DN20681_c1_g1::TRINITY_DN20681_c1_g1_i1::g.57407::m.57407	dbj_GBG27555
Acetyl CoA acetyltransferase mitochondrial	gi_1377605553	TRINITY_DN20667_c0_g1::TRINITY_DN20667_c0_g1_i1::g.57764::m.57764	dbj_GBG27099
Lipase putative	gi_1377606155	TRINITY_DN20631_c0_g1::TRINITY_DN20631_c0_g1_i1::g.57767::m.57767	dbj_GBG26382
Sn1 specific diacylglycerol lipase beta	gi_1377601761	TRINITY_DN20672_c0_g1::TRINITY_DN20672_c0_g1_i1::g.58025::m.58025	dbj_GBG30879
Fatty acid desaturase 3	gi_1377605451	TRINITY_DN20752_c0_g1::TRINITY_DN20752_c0_g1_i1::g.58113::m.58113	dbj_GBG26997
Phospholipase B	gi_1377607110	TRINITY_DN20859_c0_g1::TRINITY_DN20859_c0_g1_i4::g.59474::m.59474	dbj_GBG25254
Peroxisomal bifunctional enzyme	gi_1377605220	TRINITY_DN21075_c0_g1::TRINITY_DN21075_c0_g1_i1::g.60311::m.60311	dbj_GBG27281
1 acyl glycerol 3 phosphate acyltransferase putative	gi_1377601438	TRINITY_DN21196_c0_g1::TRINITY_DN21196_c0_g1_i1::g.61195::m.61195	dbj_GBG31133
3 beta hydroxysteroid dehydrogenase type 3	gi_1377606729	TRINITY_DN21135_c0_g1::TRINITY_DN21135_c0_g1_i1::g.61590::m.61590	dbj_GBG25927
3 ketoacyl CoA thiolase peroxisomal	gi_1377604564	TRINITY_DN21246_c0_g1::TRINITY_DN21246_c0_g1_i1::g.62275::m.62275	dbj_GBG28030
Enoyl CoA hydratase domain containing protein 3 mitochondrial	gi_1377606936	TRINITY_DN21291_c0_g1::TRINITY_DN21291_c0_g1_i1::g.62370::m.62370	dbj_GBG25544
Hypothetical Protein FCC1311 081331	gi_1377599711	TRINITY_DN21348_c0_g1::TRINITY_DN21348_c0_g1_i1::g.62921::m.62921	dbj_GBG32854
Lipase putative	gi_1377607172	TRINITY_DN21390_c0_g1::TRINITY_DN21390_c0_g1_i2::g.62982::m.62982	dbj_GBG25316
Acyl CoA dehydrogenase family member 11	gi_1377608001	TRINITY_DN21397_c0_g1::TRINITY_DN21397_c0_g1_i2::g.63275::m.63275	dbj_GBG24509
Hydroxymethylglutaryl CoA synthase	gi_1377607816	TRINITY_DN21398_c0_g1::TRINITY_DN21398_c0_g1_i2::g.63530::m.63530	dbj_GBG24740
Phosphatidylserine decarboxylase proenzyme mitochondrial	gi_1377599672	TRINITY_DN21481_c0_g1::TRINITY_DN21481_c0_g1_i1::g.63809::m.63809	dbj_GBG32895
Monoglyceride lipase	gi_1377607947	TRINITY_DN21427_c0_g1::TRINITY_DN21427_c0_g1_i1::g.63964::m.63964	dbj_GBG24455
Carnitine O palmitoyltransferase	gi_1377607159	TRINITY_DN21432_c0_g1::TRINITY_DN21432_c0_g1_i2::g.64241::m.64241	dbj_GBG25303
Long chain fatty acid CoA ligase 4 partial	gi_1377605623	TRINITY_DN21590_c0_g1::TRINITY_DN21590_c0_g1_i2::g.64781::m.64781	dbj_GBG26976
Phosphatidate cytidylyltransferase	gi_1377606696	TRINITY_DN21520_c0_g1::TRINITY_DN21520_c0_g1_i2::g.65009::m.65009	dbj_GBG25894
Ethanolamine phosphate cytidylyltransferase	gi_1377601200	TRINITY_DN21514_c0_g1::TRINITY_DN21514_c0_g1_i1::g.65463::m.65463	dbj_GBG31288
Glycerol 3 phosphate O acyltransferase 1	gi_1377608700	TRINITY_DN21581_c0_g1::TRINITY_DN21581_c0_g1_i1::g.65505::m.65505	dbj_GBG23921
Glycerol 3 phosphate O acyltransferase 1	gi_1377601096	TRINITY_DN21516_c0_g1::TRINITY_DN21516_c0_g1_i1::g.65617::m.65617	dbj_GBG31449
Delta8 fatty acid desaturase	gi_1377602889	TRINITY_DN21648_c0_g1::TRINITY_DN21648_c0_g1_i2::g.65698::m.65698	dbj_GBG29703
Acetyl CoA carboxylase	gi_1377602680	TRINITY_DN21660_c0_g1::TRINITY_DN21660_c0_g1_i2::g.65761::m.65761	dbj_GBG29850
Elongation of very long chain fatty acids protein 5	gi_1377607192	TRINITY_DN21606_c0_g3::TRINITY_DN21606_c0_g3_i1::g.65875::m.65875	dbj_GBG25336
Patatin like phospholipase domain containing protein AN0408	gi_1377606973	TRINITY_DN21782_c0_g1::TRINITY_DN21782_c0_g1_i1::g.66793::m.66793	dbj_GBG25581
Isopentenyl diphosphate Delta isomerase	gi_1377605972	TRINITY_DN21790_c0_g1::TRINITY_DN21790_c0_g1_i1::g.66931::m.66931	dbj_GBG26735
1 acyl sn glycerol 3 phosphate acyltransferase	gi_1377598394	TRINITY_DN21739_c1_g1::TRINITY_DN21739_c1_g1_i2::g.67332::m.67332	dbj_GBG34169
Acetyl CoA acetyltransferase mitochondrial	gi_1377601276	TRINITY_DN21776_c0_g1::TRINITY_DN21776_c0_g1_i1::g.67372::m.67372	dbj_GBG31230
Hypothetical Protein FCC1311 085692	gi_1377600162	TRINITY_DN21930_c0_g1::TRINITY_DN21930_c0_g1_i1::g.69265::m.69265	dbj_GBG32344
Glycerol 3 phosphate O acyltransferase 1	gi_1377607150	TRINITY_DN21962_c2_g1::TRINITY_DN21962_c2_g1_i1::g.69603::m.69603	dbj_GBG25294
Elongation of very long chain fatty acids protein 6	gi_1377607153	TRINITY_DN21962_c2_g1::TRINITY_DN21962_c2_g1_i1::g.69605::m.69605	dbj_GBG25297
Reducing polyketide synthase swnK partial	gi_1377602820	TRINITY_DN21910_c0_g1::TRINITY_DN21910_c0_g1_i1::g.69786::m.69786	dbj_GBG29714
Medium chain specific acyl CoA dehydrogenase mitochondrial	gi_1377604495	TRINITY_DN22096_c0_g1::TRINITY_DN22096_c0_g1_i1::g.70512::m.70512	dbj_GBG27961
ABC transporter ATP binding protein	gi_1377607366	TRINITY_DN22112_c0_g1::TRINITY_DN22112_c0_g1_i3::g.71456::m.71456	dbj_GBG25510
Squalene synthase	gi_1377600803	TRINITY_DN22142_c0_g1::TRINITY_DN22142_c0_g1_i2::g.71908::m.71908	dbj_GBG31736
Trifunctional enzyme subunit alpha mitochondrial	gi_1377606351	TRINITY_DN22146_c0_g1::TRINITY_DN22146_c0_g1_i1::g.71995::m.71995	dbj_GBG26215
Mitochondrial carnitine/acylcarnitine carrier protein	gi_1377598262	TRINITY_DN22138_c1_g1::TRINITY_DN22138_c1_g1_i1::g.72723::m.72723	dbj_GBG34310
Hypothetical Protein FCC1311 053432	gi_1377603343	TRINITY_DN22248_c0_g1::TRINITY_DN22248_c0_g1_i6::g.72958::m.72958	dbj_GBG29120
Farnesyl pyrophosphate synthase	gi_1377604461	TRINITY_DN22241_c1_g1::TRINITY_DN22241_c1_g1_i1::g.72967::m.72967	dbj_GBG28108
Fatty acid synthase subunit alpha	gi_1377598169	TRINITY_DN22221_c0_g1::TRINITY_DN22221_c0_g1_i2::g.73012::m.73012	dbj_GBG34374
Polyketide synthase	gi_1377602821	TRINITY_DN22208_c0_g1::TRINITY_DN22208_c0_g1_i1::g.73748::m.73748	dbj_GBG29715
Diphosphomevalonate decarboxylase	gi_1377605779	TRINITY_DN22231_c1_g1::TRINITY_DN22231_c1_g1_i2::g.73806::m.73806	dbj_GBG26760
Hypothetical Protein FCC1311 058781	gi_1377607508	TRINITY_DN22383_c0_g1::TRINITY_DN22383_c0_g1_i1::g.74412::m.74412	dbj_GBG25157
Diacylglycerol kinase 2	gi_1377604949	TRINITY_DN24585_c0_g1::TRINITY_DN24585_c0_g1_i1::g.76634::m.76634	dbj_GBG27614
Phosphatidyl N methylethanolamine N methyltransferase	gi_1377598219	TRINITY_DN26487_c0_g1::TRINITY_DN26487_c0_g1_i1::g.78291::m.78291	dbj_GBG34323
Glutathione S transferase C terminal domain containing protein	gi_1377603637	TRINITY_DN30504_c0_g1::TRINITY_DN30504_c0_g1_i1::g.82114::m.82114	dbj_GBG28950
Hypothetical Protein FCC1311 005818	gi_1377599577	TRINITY_DN30687_c0_g1::TRINITY_DN30687_c0_g1_i1::g.82144::m.82144	dbj_GBG33001
Proteasome assembly chaperone 2	gi_1377603668	TRINITY_DN31338_c0_g1::TRINITY_DN31338_c0_g1_i1::g.82962::m.82962	dbj_GBG28799
Hypothetical Protein FCC1311 005817	gi_1377599576	TRINITY_DN32616_c0_g1::TRINITY_DN32616_c0_g1_i1::g.83882::m.83882	dbj_GBG33000
